# Supplementary material for: Genotyping-by-Sequencing and Morphology Revealed the Role of Polyploidization and Hybridization in the Diversification of the Centaurea aspera L. Complex of Section Seridia (Juss.) DC. (Asteraceae)
Source: MDPI journal article supplement (doi:10.3390/plants11151919), 2022-07-25

Figure S1.

STRUCTURE clustering analysis for *Centaurea aspera*, *C. seridis* and hybrids between them in the studied area for  $K = 4$ . A. Diagram representing alignment test with individual plants represented by columns and taxonomic adscription of individuals indicated. B. Geographic location of STRUCTURE clusters. Pie charts are depicted in contact zones.

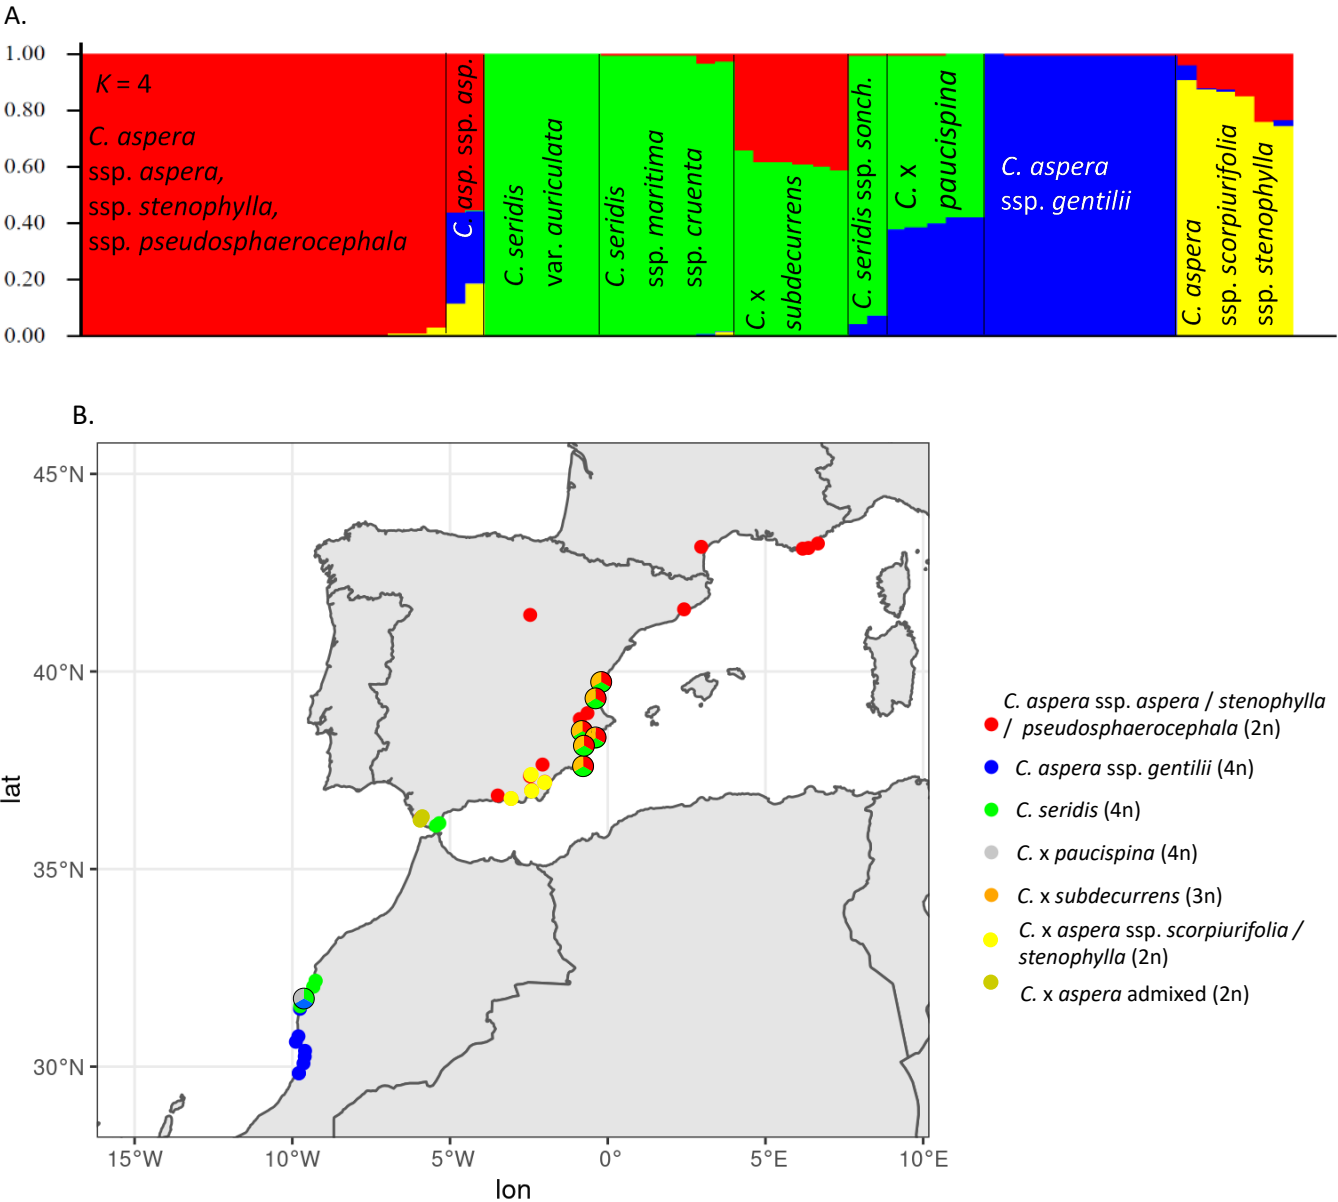

Supplement: s1 [file s1]
