# Supplementary material for: Genotyping-by-Sequencing and Morphology Revealed the Role of Polyploidization and Hybridization in the Diversification of the Centaurea aspera L. Complex of Section Seridia (Juss.) DC. (Asteraceae)
Source: MDPI journal article supplement (doi:10.3390/plants11151919), 2022-07-25
Supplement: s1 [file s1]

Figure S3.

Flow cytometry histograms based on DAPI fluorescence staining and analysed with the CyView software (Partec) obtained for different *Centaurea* individuals. A. Diploid *C. aspera* ssp. *pseudosphaerocephala*; B. Triploid *C. x subdecurrens* nothosp. *subdecurrens*; C. Tetraploid *C. seridis* var. *auriculata*. Peak number 1 corresponds to the diploid internal control (*C. aspera* ssp. *stenophylla*). Peak positions are depicted, and number of particles (particle), coefficient of variation (CV), arithmetic mean (center) and median (median) of samples are also included in the tables.

A.

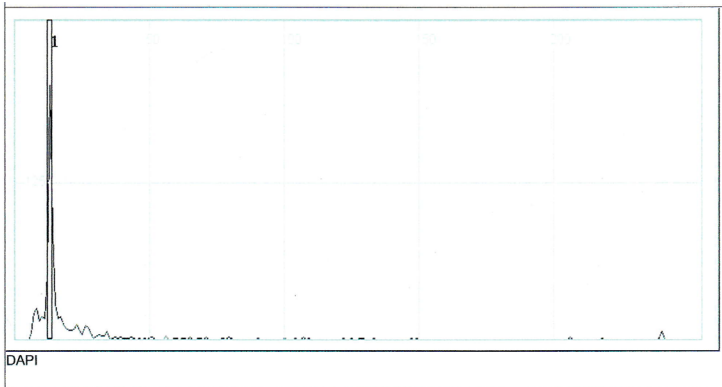

REGIONS

| Name  | Particle | Center | CV%  | Median |
|-------|----------|--------|------|--------|
| DAP_1 | 203      | 13.00  | 6.86 | 13     |

B.

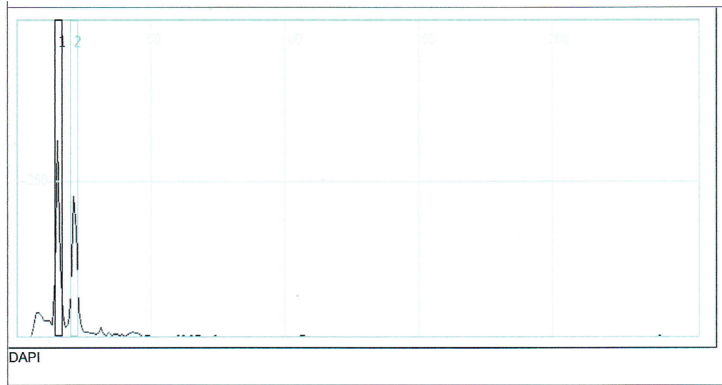

REGIONS

| Name  | Particle | Center | CV%  | Median |
|-------|----------|--------|------|--------|
| DAP_1 | 435      | 15.00  | 4.24 | 15     |
| DAP_2 | 399      | 22.52  | 3.20 | 21     |

C.

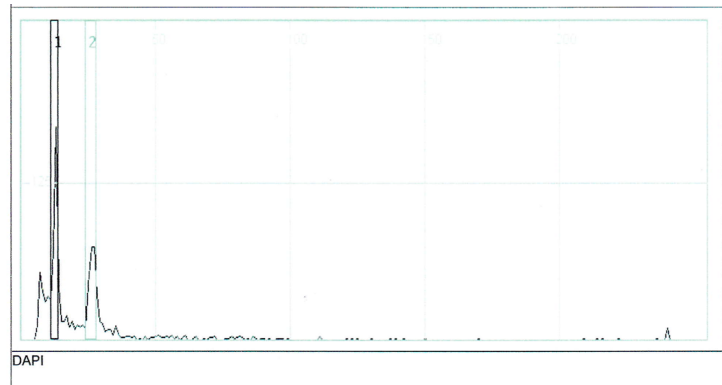

REGIONS

| Name  | Particle | Center | CV%  | Median |
|-------|----------|--------|------|--------|
| DAP_1 | 241      | 13.00  | 6.62 | 13     |
| DAP_2 | 192      | 26.00  | 3.37 | 26     |
