# Supplementary material for: Genotyping-by-Sequencing and Morphology Revealed the Role of Polyploidization and Hybridization in the Diversification of the Centaurea aspera L. Complex of Section Seridia (Juss.) DC. (Asteraceae)
Source: MDPI journal article supplement (doi:10.3390/plants11151919), 2022-07-25
Supplement: s1 [file s1]

Table S1.

Measures of population diversity and differentiation in *Centaurea aspera* and *C. seridis* using a large SNP set. STRUCTURE analysis was used for establishing  $k = 4$  genetic populations.

| Population                                                  | $H_S$ | $H_T$ | $n$    | $G'_{ST}$ | $F_{ST}$ |                                 |            |
|-------------------------------------------------------------|-------|-------|--------|-----------|----------|---------------------------------|------------|
|                                                             |       |       |        |           | $F_{ST}$ | 5% - 95%<br>confidence interval | $p$ -value |
| <i>C. aspera</i> cluster 1 (2n)                             | 0.144 |       | 22.047 |           |          |                                 |            |
| <i>C. aspera</i> cluster 2 (2n)                             | 0.088 |       | 6.286  |           |          |                                 |            |
| <i>C. aspera</i> spp. <i>gentilii</i> (4n)                  | 0.109 |       | 9.966  |           |          |                                 |            |
| <i>C. seridis</i> (4n)                                      | 0.231 | 0.291 | 14.491 | 0.461     | 0.271    | 0.242<br>0.295                  | 0          |
| <i>C. x subdecurrens</i> (3n)                               | 0.300 |       | 5.794  |           |          |                                 |            |
| <i>C. x subdecurrens</i><br>nothosp. <i>paucispina</i> (4n) | 0.288 |       | 4.389  |           |          |                                 |            |

$H_S$ : average population heterozygosity,  $H_T$ : Total population heterozygosity,  $n$ : number of alleles observed in each population,  $G'_{ST}$ : genetic population differentiation  $G'_{ST}$  weighted by the number of alleles observed in each population,  $F_{ST}$ : Fixation index, values along with confidence intervals (5% and 95%) and  $p$ -values between populations following 100 bootstrappings across loci.
