# Supplementary material for: Genotyping-by-Sequencing and Morphology Revealed the Role of Polyploidization and Hybridization in the Diversification of the Centaurea aspera L. Complex of Section Seridia (Juss.) DC. (Asteraceae)
Source: MDPI journal article supplement (doi:10.3390/plants11151919), 2022-07-25

Figure S2.

Two-dimensional plot of the Principal Component Analysis based on the morphology of the *Centaurea aspera* and *C. seridis* individuals. STRUCTURE analysis was used for establishing  $K = 4$  genetic populations. A. Vegetative characters B. Reproductive characters. C. Vegetative and reproductive characters.

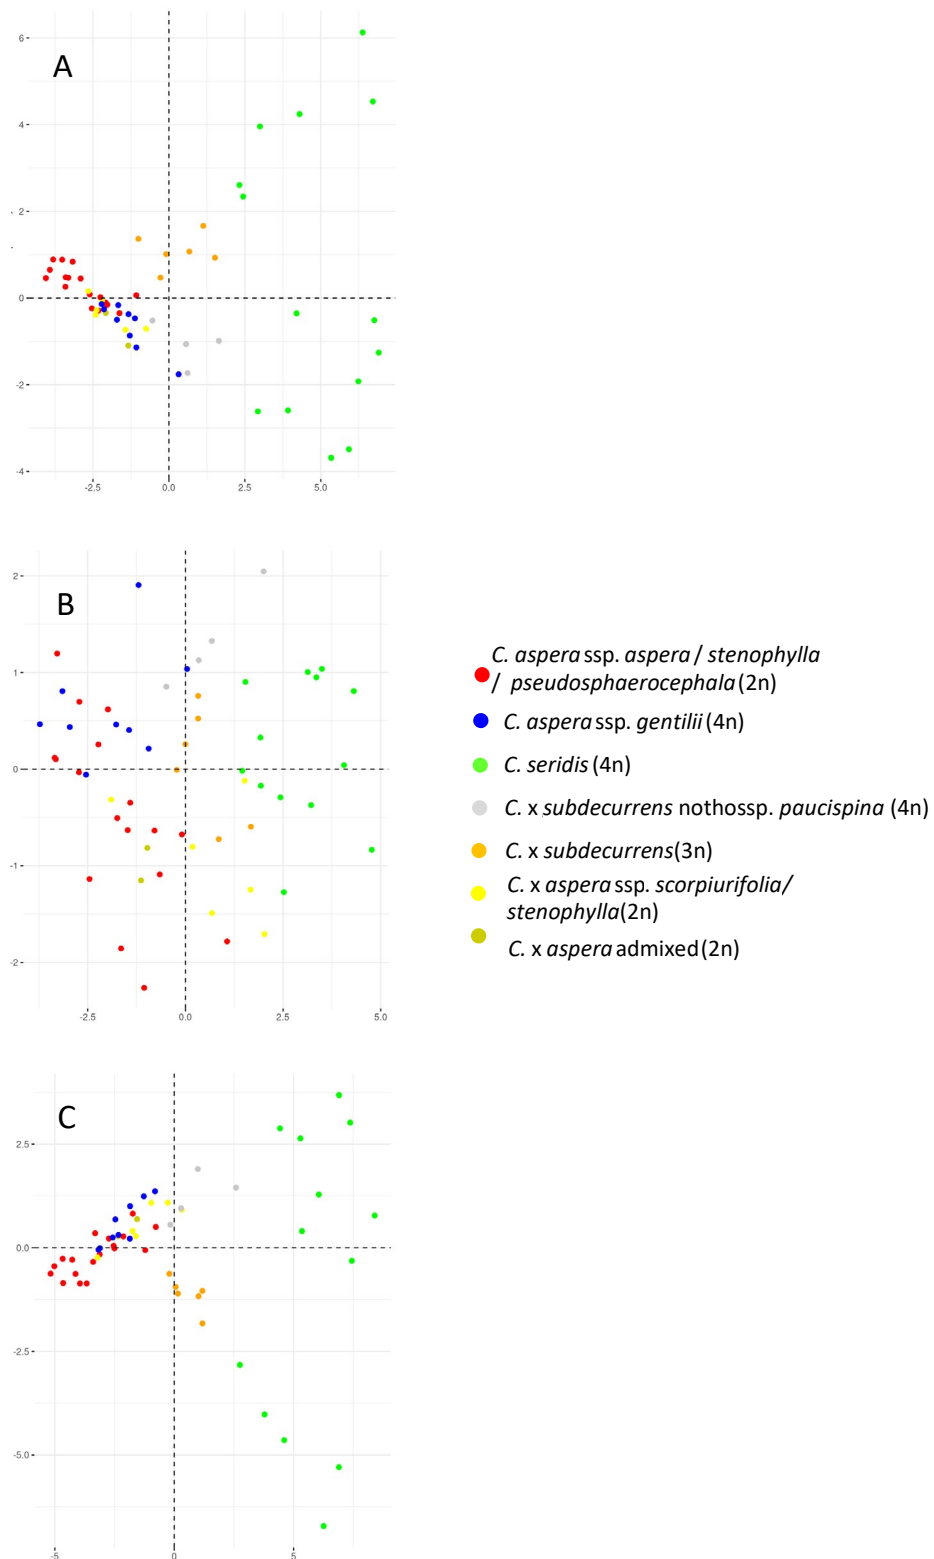

Supplement: s1 [file s1]
