# Supplementary material for: Genotyping-by-Sequencing and Morphology Revealed the Role of Polyploidization and Hybridization in the Diversification of the Centaurea aspera L. Complex of Section Seridia (Juss.) DC. (Asteraceae)
Source: Plants (Basel). 2022 Jul 25;11(15):1919. doi: 10.3390/plants11151919 (PMC9332712; doi:10.3390/plants11151919)
Supplement: Supplementary file 1 [file plants-11-01919-s001.zip]

Archive with 5 entries (5 files):
- Data S1.vcf
- Figure S1.pdf
- Figure S2.pdf
- Figure S3.pdf
- Table S1.pdf
