# Supplementary material for: Genotyping-by-Sequencing and Morphology Revealed the Role of Polyploidization and Hybridization in the Diversification of the Centaurea aspera L. Complex of Section Seridia (Juss.) DC. (Asteraceae)
Source: Plants (Basel). 2022 Jul 25;11(15):1919. doi: 10.3390/plants11151919 (PMC9332712; doi:10.3390/plants11151919)
Supplement: Supplementary file 1 [file plants-11-01919-s001.zip › Data S1.vcf]

##fileformat=VCFv4.1
##fileDate=Wed Dec 11 12:01:33 2019
##source=GBS-SNP-CROP
##phasing=partial
##INFO=<ID=AC,Number=A,Type=Integer,Description="Allele Count">
##INFO=<ID=AF,Number=A,Type=Integer,Description="Allele Frequency">
##INFO=<ID=DP,Number=1,Type=Integer,Description="Total Depth">
##INFO=<ID=AV,Number=1,Type=Integer,Description="Average Depth">
##INFO=<ID=NS,Number=1,Type=Integer,Description="Number of Samples With Data">
##FORMAT=<ID=GT,Number=1,Type=String,Description="Genotype">
##FORMAT=<ID=DP,Number=1,Type=Integer,Description="Read Depth">
##FORMAT=<ID=AD,Number=1,Type=Integer,Description="Allele Depth">
#CHROM	POS	ID	REF	ALT	QUAL	FILTER	INFO	FORMAT	SSLC	AGSR	AALP	SAES	ACBE1	AANA	ASSP	AGAG	ASCB	AGCG	AGES	ASMM2	AGTI2	AGTI1	AAAL	AGTA	AGZK1	AGZK2	APHY	APLL	APPA	APMA	ASCH	ASFH	ASGM	ASMM1	ASMO	ASSX	ACAL1	ACAL2	ASVR	ASTI	AALI	AAVF	ACLP	ACBE2	AGTK	HSGM	HSSP	HOSX1	HSCB
MockRefGenome	1851	.	C	T	.	PASS	AC=10;AF=0.050;DP=80982;AV=751.84;NS=82	GT:DP:AD	0/0:851:850,1	./.:0:.,.	0/0:1077:1077,0	0/0:1584:1584,0	0/1:1613:547,1066	0/0:854:853,1	./.:0:.,.	0/0:493:493,0	0/0:1302:1302,0	0/0:942:941,1	./.:0:.,.	./.:0:.,.	./.:0:.,.	0/0:1075:1075,0	0/0:999:999,0	0/0:800:800,0	0/0:822:822,0	0/0:1211:1211,0	0/0:534:533,1	0/0:675:675,0	0/0:1238:1237,1	./.:0:.,.	0/0:707:707,0	0/0:726:726,0	./.:0:.,.	0/0:735:735,0	0/0:1309:1308,1	0/0:1281:1280,1	0/1:1669:624,1045	0/1:962:344,618	0/0:1622:1621,1	0/1:1131:953,178	./.:0:.,.	0/0:533:532,1	0/1:1149:447,702	0/1:986:283,703	0/0:990:989,1	./.:0:.,.	0/0:884:884,0	0/0:724:724,0	0/0:572:572,0
MockRefGenome	2759	.	G	A	.	PASS	AC=10;AF=0.050;DP=66461;AV=603.28;NS=85	GT:DP:AD	0/0:1017:1016,1	./.:0:.,.	0/0:1140:1140,0	./.:0:.,.	0/1:1306:458,848	0/0:654:654,0	./.:0:.,.	0/0:392:392,0	0/0:1197:1197,0	0/0:666:666,0	0/0:861:861,0	0/0:1283:1283,0	0/0:1253:1253,0	0/0:879:879,0	0/0:795:794,1	0/0:694:694,0	0/0:520:519,1	0/0:937:937,0	0/0:372:372,0	0/0:468:468,0	0/0:720:719,1	0/0:671:670,1	0/0:539:538,1	0/0:557:557,0	0/0:938:938,0	0/0:905:905,0	0/0:665:664,1	0/0:894:893,1	0/1:1333:557,776	0/1:998:375,623	0/0:1018:1017,1	0/1:952:815,137	0/0:289:288,1	0/0:333:333,0	0/1:1043:419,624	0/1:795:240,555	0/0:746:746,0	./.:0:.,.	0/0:775:775,0	0/0:431:431,0	0/0:725:724,1
MockRefGenome	3036	.	T	C	.	PASS	AC=9;AF=0.045;DP=48896;AV=467.69;NS=86	GT:DP:AD	./.:0:.,.	0/0:783:782,1	0/0:957:956,1	0/0:1890:1890,0	0/0:829:828,1	0/0:452:452,0	0/0:878:877,1	0/0:97:97,0	./.:0:.,.	0/0:287:286,1	0/0:419:419,0	0/0:803:803,0	0/0:489:489,0	0/0:459:459,0	0/0:995:995,0	0/0:305:305,0	0/0:178:178,0	0/0:366:366,0	0/0:309:309,0	0/0:536:535,1	0/0:612:611,1	0/0:604:603,1	./.:0:.,.	./.:0:.,.	./.:0:.,.	./.:0:.,.	0/0:377:377,0	0/0:789:788,1	0/0:580:580,0	0/0:525:525,0	0/0:666:666,0	0/0:592:592,0	0/0:171:171,0	0/0:277:277,0	0/0:686:686,0	0/0:737:737,0	0/0:285:285,0	0/0:461:460,1	0/0:1051:1050,1	0/0:739:738,1	./.:0:.,.
MockRefGenome	4153	.	G	A	.	PASS	AC=14;AF=0.070;DP=46297;AV=471.80;NS=89	GT:DP:AD	0/0:575:575,0	0/0:1181:1181,0	0/0:1088:1087,1	0/0:2388:2388,0	./.:0:.,.	0/0:375:375,0	0/0:723:722,1	0/0:135:135,0	0/0:978:978,0	0/0:632:632,0	0/0:462:462,0	0/0:644:644,0	0/0:446:446,0	0/0:514:514,0	0/0:619:619,0	0/0:280:280,0	0/0:167:167,0	0/0:319:319,0	0/0:448:448,0	0/0:379:379,0	0/0:407:407,0	0/0:465:464,1	0/0:234:234,0	0/0:270:269,1	0/0:706:706,0	0/0:664:664,0	0/0:282:282,0	0/0:453:453,0	1/1:321:1,320	1/1:296:0,296	0/0:596:595,1	1/1:368:1,367	./.:0:.,.	./.:0:.,.	1/1:625:0,625	1/1:1178:1,1177	0/0:339:339,0	0/0:475:474,1	0/0:796:796,0	0/0:452:452,0	0/0:569:569,0
MockRefGenome	4249	.	A	T	.	PASS	AC=12;AF=0.060;DP=47676;AV=481.69;NS=88	GT:DP:AD	1/1:585:0,585	0/0:1195:1195,0	0/0:1091:1091,0	0/0:2398:2398,0	0/0:565:564,1	0/0:381:381,0	./.:0:.,.	0/0:135:135,0	0/0:998:997,1	0/0:639:639,0	0/0:470:470,0	0/0:666:665,1	0/0:452:452,0	0/0:521:521,0	0/0:633:633,0	0/0:285:285,0	0/0:175:175,0	0/0:328:327,1	0/0:453:453,0	0/0:385:385,0	0/0:415:414,1	0/0:468:468,0	./.:0:.,.	./.:0:.,.	0/0:738:737,1	./.:0:.,.	0/0:286:286,0	0/0:478:478,0	0/0:340:340,0	0/0:307:306,1	0/0:620:620,0	0/0:382:382,0	0/0:262:262,0	0/0:291:291,0	0/0:651:651,0	0/0:1228:1227,1	0/0:343:343,0	0/0:493:492,1	0/0:832:831,1	0/0:467:467,0	0/0:583:583,0
MockRefGenome	4770	.	G	C	.	PASS	AC=13;AF=0.065;DP=64215;AV=606.70;NS=83	GT:DP:AD	1/1:573:1,572	0/0:1147:1147,0	./.:0:.,.	0/0:2666:2666,0	0/0:1079:1079,0	0/0:318:318,0	./.:0:.,.	0/0:61:61,0	0/1:75:13,62	0/0:269:269,0	0/0:211:211,0	./.:0:.,.	0/0:260:260,0	0/0:207:207,0	0/0:1693:1692,1	0/0:149:149,0	0/0:214:213,1	0/0:441:441,0	./.:0:.,.	0/0:229:229,0	0/0:259:258,1	0/0:446:446,0	./.:0:.,.	./.:0:.,.	0/0:1230:1229,1	./.:0:.,.	./.:0:.,.	0/0:1073:1073,0	0/0:897:897,0	0/0:743:743,0	0/0:1128:1128,0	0/0:764:764,0	0/0:467:467,0	0/0:435:434,1	0/0:967:967,0	0/0:1251:1250,1	0/0:259:259,0	./.:0:.,.	0/0:1251:1251,0	0/0:1046:1045,1	0/1:47:9,38
MockRefGenome	5760	.	T	G	.	PASS	AC=22;AF=0.110;DP=26292;AV=255.01;NS=89	GT:DP:AD	1/1:353:0,353	0/0:773:772,1	0/0:315:314,1	0/0:904:904,0	0/0:370:370,0	0/0:382:382,0	./.:0:.,.	0/0:244:243,1	1/1:767:1,766	0/0:226:226,0	0/0:420:420,0	0/0:325:325,0	0/0:236:236,0	0/0:311:311,0	0/0:390:389,1	0/0:260:260,0	0/0:212:212,0	0/0:215:215,0	./.:0:.,.	0/0:283:283,0	./.:0:.,.	0/0:303:303,0	./.:0:.,.	./.:0:.,.	0/0:360:360,0	0/0:243:243,0	0/0:213:213,0	0/0:367:367,0	0/0:386:386,0	0/0:259:259,0	0/0:275:275,0	0/0:267:267,0	0/0:153:153,0	0/0:141:141,0	0/0:315:315,0	0/0:244:244,0	1/1:220:1,219	0/0:173:172,1	0/0:276:275,1	0/0:363:362,1	./.:0:.,.
MockRefGenome	6795	.	A	C	.	PASS	AC=20;AF=0.100;DP=21387;AV=207.39;NS=88	GT:DP:AD	1/1:311:0,311	0/0:574:573,1	0/0:339:339,0	0/0:726:726,0	0/0:362:362,0	0/0:297:297,0	0/0:387:386,1	0/0:195:194,1	./.:0:.,.	0/0:219:219,0	0/0:314:314,0	0/0:232:232,0	0/0:151:151,0	0/0:200:200,0	./.:0:.,.	0/0:223:223,0	0/0:173:173,0	0/0:194:194,0	./.:0:.,.	0/0:312:312,0	0/0:190:190,0	0/0:252:252,0	0/0:255:254,1	./.:0:.,.	0/0:292:292,0	./.:0:.,.	0/0:185:185,0	0/0:297:297,0	0/0:321:321,0	0/0:270:270,0	0/0:212:212,0	0/0:247:247,0	0/0:128:128,0	0/0:129:129,0	0/0:246:246,0	0/0:224:224,0	1/1:154:0,154	0/0:158:158,0	0/0:252:252,0	0/0:327:327,0	1/1:193:1,192
MockRefGenome	13908	.	A	G	.	PASS	AC=20;AF=0.100;DP=13505;AV=132.36;NS=98	GT:DP:AD	1/1:250:0,250	0/0:335:334,1	0/0:209:209,0	0/0:583:583,0	0/0:191:191,0	0/0:161:161,0	0/0:204:204,0	0/0:119:119,0	0/0:385:385,0	0/0:123:123,0	0/0:164:164,0	0/0:210:210,0	0/0:97:97,0	0/0:130:130,0	0/0:212:212,0	0/0:126:126,0	0/0:118:118,0	0/0:108:107,1	0/0:148:148,0	0/0:158:158,0	0/0:109:109,0	0/0:127:127,0	0/0:208:207,1	0/0:134:134,0	0/0:174:174,0	0/0:133:132,1	0/0:99:99,0	0/0:192:192,0	0/0:161:161,0	0/0:189:189,0	0/0:162:162,0	0/0:159:159,0	0/0:48:48,0	0/0:67:67,0	0/0:132:132,0	0/0:146:146,0	0/0:72:72,0	0/0:110:109,1	0/0:146:146,0	0/0:228:228,0	0/0:115:115,0
MockRefGenome	18164	.	G	A	.	PASS	AC=48;AF=0.240;DP=13604;AV=143.19;NS=79	GT:DP:AD	1/1:284:0,284	0/0:1513:1513,0	0/0:139:139,0	0/1:33:8,25	./.:0:.,.	0/0:121:121,0	0/0:228:227,1	0/0:112:112,0	./.:0:.,.	./.:0:.,.	0/0:163:162,1	0/0:340:340,0	0/0:273:272,1	0/0:234:234,0	./.:0:.,.	0/0:143:143,0	./.:0:.,.	0/0:246:245,1	0/0:78:77,1	0/0:87:87,0	./.:0:.,.	0/1:146:127,19	./.:0:.,.	0/0:115:115,0	0/0:240:240,0	0/0:202:202,0	0/0:178:178,0	0/0:387:387,0	0/0:251:250,1	0/0:170:170,0	0/0:300:300,0	0/0:111:111,0	0/0:142:142,0	0/0:119:119,0	0/0:249:249,0	0/0:225:225,0	0/0:220:220,0	./.:0:.,.	./.:0:.,.	0/1:59:19,40	0/1:157:42,115
MockRefGenome	18179	.	G	A	.	PASS	AC=46;AF=0.230;DP=13562;AV=124.34;NS=80	GT:DP:AD	1/1:276:0,276	./.:0:.,.	0/0:139:139,0	0/1:32:8,24	0/0:249:248,1	0/0:121:121,0	./.:0:.,.	0/0:112:112,0	0/0:204:203,1	0/0:125:124,1	0/0:163:162,1	0/0:340:340,0	./.:0:.,.	0/0:234:234,0	0/0:156:156,0	0/0:143:143,0	0/0:179:178,1	./.:0:.,.	0/0:78:77,1	0/0:87:87,0	0/0:144:144,0	0/0:146:146,0	./.:0:.,.	0/0:115:115,0	0/0:240:239,1	0/0:201:201,0	0/0:178:178,0	0/0:387:387,0	./.:0:.,.	0/0:170:170,0	0/0:300:299,1	0/0:111:111,0	0/0:142:142,0	0/0:119:119,0	0/0:250:249,1	0/1:225:162,63	0/0:220:219,1	./.:0:.,.	./.:0:.,.	0/1:58:19,39	0/1:155:42,113
MockRefGenome	22569	.	G	T	.	PASS	AC=27;AF=0.135;DP=8564;AV=91.75;NS=92	GT:DP:AD	1/1:26:0,26	0/0:208:208,0	0/0:137:137,0	0/0:370:370,0	0/0:145:145,0	0/0:124:124,0	1/1:48:0,48	0/0:94:94,0	1/1:208:0,208	0/0:91:91,0	0/0:117:117,0	0/0:110:110,0	0/0:79:79,0	0/0:113:113,0	0/0:124:124,0	0/0:93:93,0	0/0:87:87,0	0/0:78:78,0	1/1:104:1,103	0/0:126:126,0	0/0:82:82,0	0/0:91:91,0	0/0:87:87,0	./.:0:.,.	0/0:142:142,0	0/0:82:82,0	0/0:79:79,0	0/0:136:135,1	0/0:128:128,0	0/0:95:95,0	0/0:109:109,0	0/0:109:109,0	./.:0:.,.	1/1:54:1,53	0/0:115:115,0	0/0:100:100,0	0/0:73:73,0	0/0:64:63,1	1/1:36:1,35	0/0:144:144,0	./.:0:.,.
MockRefGenome	22570	.	T	A	.	PASS	AC=27;AF=0.135;DP=8563;AV=91.74;NS=92	GT:DP:AD	1/1:26:0,26	0/0:209:209,0	0/0:137:137,0	0/0:370:370,0	0/0:145:145,0	0/0:124:124,0	1/1:48:0,48	0/0:94:94,0	1/1:208:0,208	0/0:91:91,0	0/0:117:117,0	0/0:110:110,0	0/0:79:79,0	0/0:113:113,0	0/0:124:124,0	0/0:93:93,0	0/0:87:87,0	0/0:78:78,0	1/1:104:1,103	0/0:126:126,0	0/0:82:82,0	0/0:91:91,0	0/0:87:87,0	./.:0:.,.	0/0:142:142,0	0/0:82:82,0	0/0:79:79,0	0/0:136:135,1	0/0:128:128,0	0/0:95:95,0	0/0:109:109,0	0/0:109:109,0	./.:0:.,.	1/1:54:1,53	0/0:115:115,0	0/0:100:100,0	0/0:73:73,0	0/0:64:63,1	1/1:36:1,35	0/0:144:144,0	./.:0:.,.
MockRefGenome	22571	.	A	C	.	PASS	AC=27;AF=0.135;DP=8561;AV=91.72;NS=92	GT:DP:AD	1/1:26:0,26	0/0:209:209,0	0/0:137:137,0	0/0:370:370,0	0/0:145:145,0	0/0:124:124,0	1/1:48:0,48	0/0:93:93,0	1/1:208:0,208	0/0:91:91,0	0/0:117:117,0	0/0:110:110,0	0/0:79:79,0	0/0:113:113,0	0/0:124:124,0	0/0:93:93,0	0/0:87:87,0	0/0:78:78,0	1/1:104:1,103	0/0:126:126,0	0/0:82:82,0	0/0:91:91,0	0/0:87:87,0	./.:0:.,.	0/0:142:142,0	0/0:82:82,0	0/0:79:79,0	0/0:136:135,1	0/0:128:128,0	0/0:95:95,0	0/0:109:109,0	0/0:109:109,0	./.:0:.,.	1/1:54:1,53	0/0:115:115,0	0/0:100:100,0	0/0:73:73,0	0/0:64:63,1	1/1:36:1,35	0/0:144:144,0	./.:0:.,.
MockRefGenome	24078	.	T	G	.	PASS	AC=22;AF=0.110;DP=8524;AV=87.49;NS=87	GT:DP:AD	1/1:20:0,20	0/0:178:178,0	0/0:123:123,0	0/0:363:363,0	./.:0:.,.	0/0:103:103,0	1/1:62:1,61	0/0:68:68,0	1/1:323:0,323	0/0:104:104,0	0/0:136:136,0	0/0:121:121,0	0/0:88:88,0	0/0:99:99,0	0/0:129:129,0	0/0:101:101,0	0/0:81:81,0	0/0:82:82,0	1/1:115:1,114	0/0:139:139,0	0/0:91:90,1	0/0:87:87,0	0/0:101:100,1	./.:0:.,.	0/0:144:144,0	0/0:93:93,0	0/0:67:67,0	0/0:125:125,0	0/0:110:110,0	0/0:81:81,0	0/0:116:116,0	0/0:100:100,0	./.:0:.,.	1/1:66:0,66	0/0:101:101,0	0/0:95:95,0	0/0:73:73,0	0/0:84:84,0	1/1:30:0,30	0/0:142:142,0	./.:0:.,.
MockRefGenome	24079	.	A	T	.	PASS	AC=22;AF=0.110;DP=8527;AV=87.55;NS=87	GT:DP:AD	1/1:20:0,20	0/0:178:178,0	0/0:123:123,0	0/0:364:364,0	./.:0:.,.	0/0:103:103,0	1/1:62:1,61	0/0:68:68,0	1/1:323:0,323	0/0:104:104,0	0/0:136:136,0	0/0:121:121,0	0/0:88:88,0	0/0:99:99,0	0/0:129:129,0	0/0:101:101,0	0/0:81:81,0	0/0:82:82,0	1/1:115:1,114	0/0:139:139,0	0/0:91:90,1	0/0:88:88,0	0/0:101:100,1	./.:0:.,.	0/0:144:144,0	0/0:93:93,0	0/0:67:67,0	0/0:125:125,0	0/0:110:110,0	0/0:81:81,0	0/0:116:116,0	0/0:100:100,0	./.:0:.,.	1/1:66:0,66	0/0:102:102,0	0/0:95:95,0	0/0:73:73,0	0/0:84:84,0	1/1:30:0,30	0/0:142:142,0	./.:0:.,.
MockRefGenome	24080	.	C	A	.	PASS	AC=22;AF=0.110;DP=8526;AV=87.54;NS=87	GT:DP:AD	1/1:20:0,20	0/0:178:178,0	0/0:123:123,0	0/0:364:364,0	./.:0:.,.	0/0:103:103,0	1/1:62:1,61	0/0:68:68,0	1/1:323:0,323	0/0:104:104,0	0/0:136:136,0	0/0:121:121,0	0/0:88:88,0	0/0:99:99,0	0/0:129:129,0	0/0:101:101,0	0/0:81:81,0	0/0:82:82,0	1/1:115:1,114	0/0:139:139,0	0/0:91:90,1	0/0:88:88,0	0/0:101:100,1	./.:0:.,.	0/0:144:144,0	0/0:93:93,0	0/0:67:67,0	0/0:125:125,0	0/0:110:110,0	0/0:81:81,0	0/0:116:116,0	0/0:100:100,0	./.:0:.,.	1/1:66:0,66	0/0:102:102,0	0/0:95:95,0	0/0:73:73,0	0/0:84:84,0	1/1:30:0,30	0/0:141:141,0	./.:0:.,.
MockRefGenome	25844	.	A	C	.	PASS	AC=10;AF=0.050;DP=7987;AV=81.96;NS=95	GT:DP:AD	0/0:36:36,0	0/0:162:162,0	1/1:93:0,93	0/0:363:363,0	./.:0:.,.	0/0:112:112,0	0/0:137:137,0	0/0:20:20,0	0/0:221:221,0	0/0:48:48,0	0/0:56:56,0	0/0:110:110,0	0/0:117:117,0	0/0:120:120,0	0/0:136:136,0	0/0:56:56,0	0/0:42:42,0	0/0:101:101,0	0/0:52:52,0	0/0:96:96,0	0/0:91:91,0	0/0:172:172,0	0/0:49:49,0	0/0:30:30,0	1/1:122:0,122	0/0:101:101,0	0/0:46:46,0	0/0:123:123,0	0/0:54:54,0	0/0:52:52,0	1/1:53:0,53	0/0:56:56,0	0/0:39:39,0	0/0:75:75,0	./.:0:.,.	0/0:64:64,0	0/0:75:75,0	1/1:67:1,66	0/0:151:151,0	0/0:133:133,0	0/0:109:109,0
MockRefGenome	25846	.	T	C	.	PASS	AC=27;AF=0.135;DP=7990;AV=81.80;NS=95	GT:DP:AD	1/1:36:0,36	0/0:162:162,0	0/0:93:93,0	0/0:363:363,0	0/0:132:132,0	0/0:112:112,0	0/0:137:137,0	0/0:20:20,0	1/1:221:0,221	0/0:48:48,0	0/0:56:56,0	0/0:110:109,1	0/0:117:117,0	0/0:120:120,0	0/0:136:136,0	0/0:56:56,0	0/0:42:42,0	0/0:101:101,0	1/1:52:0,52	0/0:96:95,1	0/0:91:91,0	0/0:173:173,0	0/0:49:49,0	0/0:30:30,0	0/0:122:122,0	0/0:101:101,0	0/0:46:46,0	0/0:124:123,1	0/0:54:54,0	0/0:52:52,0	0/0:53:53,0	0/0:56:56,0	0/0:39:39,0	0/0:75:75,0	./.:0:.,.	0/0:64:64,0	0/0:76:76,0	0/0:67:67,0	0/0:151:151,0	0/0:133:133,0	1/1:109:0,109
MockRefGenome	25916	.	A	C	.	PASS	AC=19;AF=0.095;DP=7823;AV=79.82;NS=96	GT:DP:AD	1/1:35:0,35	0/0:157:157,0	0/0:92:92,0	0/0:358:358,0	0/0:128:128,0	0/0:109:109,0	0/0:134:134,0	0/0:20:20,0	0/0:218:218,0	0/0:48:48,0	0/0:55:55,0	0/0:110:109,1	0/0:117:117,0	0/0:114:114,0	0/0:135:135,0	0/0:55:55,0	0/0:41:41,0	0/0:100:100,0	0/0:50:50,0	0/0:90:90,0	0/0:86:86,0	0/0:169:169,0	0/0:47:47,0	0/0:30:30,0	0/0:117:117,0	0/0:101:101,0	0/0:45:45,0	0/0:123:122,1	0/0:52:52,0	0/0:50:50,0	0/0:51:51,0	0/0:55:55,0	0/0:38:38,0	0/0:75:75,0	./.:0:.,.	0/0:63:63,0	0/0:74:74,0	0/0:62:62,0	0/0:146:146,0	0/0:131:131,0	0/0:108:108,0
MockRefGenome	26818	.	C	T	.	PASS	AC=32;AF=0.160;DP=18055;AV=180.70;NS=73	GT:DP:AD	1/1:51:0,51	./.:0:.,.	0/0:192:192,0	0/1:18:9,9	0/0:429:429,0	./.:0:.,.	./.:0:.,.	0/0:256:256,0	0/0:331:330,1	0/0:177:177,0	0/0:334:334,0	0/0:489:489,0	./.:0:.,.	0/0:610:610,0	0/0:216:216,0	0/0:221:220,1	0/0:316:315,1	0/0:583:582,1	0/0:167:167,0	0/0:129:129,0	0/0:281:281,0	0/0:330:330,0	0/0:139:139,0	0/0:177:177,0	0/0:388:387,1	0/0:294:294,0	0/0:326:325,1	0/0:525:525,0	0/0:251:250,1	0/0:149:149,0	0/0:267:267,0	0/0:111:111,0	0/0:324:323,1	0/0:245:244,1	0/0:237:237,0	0/1:189:133,56	0/0:455:455,0	0/1:68:7,61	0/1:45:13,32	0/1:43:18,25	0/1:103:65,38
MockRefGenome	26833	.	C	T	.	PASS	AC=45;AF=0.225;DP=25800;AV=255.17;NS=77	GT:DP:AD	1/1:210:0,210	0/0:2166:2166,0	0/0:192:192,0	./.:0:.,.	./.:0:.,.	0/0:294:293,1	0/0:383:382,1	0/0:257:256,1	./.:0:.,.	0/0:178:177,1	0/0:335:334,1	0/0:490:489,1	0/0:662:661,1	0/0:610:609,1	./.:0:.,.	0/0:221:221,0	./.:0:.,.	0/0:584:583,1	0/0:167:167,0	0/0:129:129,0	./.:0:.,.	0/1:330:281,49	0/0:139:139,0	0/0:177:177,0	0/0:389:389,0	0/0:294:294,0	0/0:326:326,0	0/0:526:525,1	0/0:251:251,0	0/0:149:149,0	0/0:268:267,1	0/0:111:110,1	./.:0:.,.	0/0:244:244,0	0/0:237:236,1	0/0:189:189,0	0/0:456:455,1	./.:0:.,.	./.:0:.,.	0/1:114:18,96	0/1:282:65,217
MockRefGenome	27072	.	C	T	.	PASS	AC=24;AF=0.120;DP=25941;AV=253.78;NS=94	GT:DP:AD	0/0:216:216,0	0/1:2166:581,1585	0/0:192:192,0	./.:0:.,.	0/0:432:432,0	./.:0:.,.	0/0:383:383,0	0/1:257:95,162	0/0:333:333,0	0/1:178:46,132	0/1:335:179,156	0/0:490:490,0	0/1:662:114,548	0/1:609:145,464	0/0:217:217,0	0/1:221:41,180	0/1:317:151,166	0/1:583:360,223	0/0:167:167,0	0/0:129:129,0	0/0:281:281,0	0/0:330:330,0	0/0:139:139,0	0/0:177:177,0	0/0:389:389,0	0/0:294:294,0	0/0:326:326,0	0/0:526:526,0	0/0:251:251,0	0/1:149:89,60	0/0:268:268,0	0/0:105:105,0	0/0:326:326,0	0/0:245:245,0	0/0:237:237,0	0/0:187:186,1	./.:0:.,.	0/0:251:251,0	0/0:259:259,0	0/0:120:120,0	0/0:283:283,0
MockRefGenome	28349	.	G	A	.	PASS	AC=44;AF=0.220;DP=8392;AV=90.60;NS=90	GT:DP:AD	0/0:139:139,0	1/1:199:0,199	0/0:114:114,0	1/1:21:1,20	0/0:178:178,0	./.:0:.,.	0/0:167:167,0	1/1:81:0,81	0/0:304:304,0	1/1:99:0,99	1/1:115:0,115	0/0:162:162,0	1/1:88:1,87	1/1:114:0,114	0/0:156:156,0	1/1:70:0,70	1/1:11:0,11	1/1:10:0,10	0/0:102:102,0	0/0:94:94,0	0/0:84:84,0	0/0:83:83,0	0/0:109:109,0	0/0:86:86,0	0/0:97:97,0	0/0:104:104,0	0/0:80:79,1	0/0:104:104,0	0/0:129:129,0	0/0:73:73,0	0/0:119:119,0	0/0:126:126,0	0/0:47:47,0	0/0:65:65,0	0/0:137:137,0	0/0:103:103,0	1/1:63:0,63	0/0:81:81,0	0/0:102:102,0	0/0:124:124,0	0/0:95:95,0
MockRefGenome	30557	.	C	T	.	PASS	AC=54;AF=0.270;DP=10862;AV=105.86;NS=95	GT:DP:AD	0/0:169:169,0	1/1:265:0,265	0/0:165:165,0	./.:0:.,.	0/0:176:176,0	./.:0:.,.	0/0:197:197,0	1/1:125:0,125	0/0:216:216,0	1/1:128:1,127	1/1:174:0,174	0/0:96:96,0	1/1:97:1,96	1/1:133:0,133	0/0:174:174,0	1/1:127:0,127	1/1:100:1,99	1/1:97:0,97	0/0:149:149,0	0/0:153:153,0	0/0:134:134,0	0/0:99:98,1	0/0:90:90,0	0/0:102:102,0	0/0:151:151,0	0/0:76:76,0	0/0:92:92,0	0/0:143:143,0	0/0:142:142,0	0/0:84:84,0	0/0:121:121,0	0/0:126:126,0	0/0:54:54,0	0/0:85:85,0	0/0:148:148,0	0/0:106:106,0	1/1:63:0,63	0/0:82:82,0	0/0:121:121,0	0/0:144:144,0	0/0:64:64,0
MockRefGenome	34139	.	A	C	.	PASS	AC=66;AF=0.330;DP=9787;AV=96.50;NS=96	GT:DP:AD	0/0:130:130,0	1/1:270:0,270	0/0:153:153,0	./.:0:.,.	0/0:164:164,0	0/0:119:118,1	0/0:160:160,0	./.:0:.,.	0/0:306:306,0	1/1:75:0,75	1/1:138:1,137	0/0:157:157,0	1/1:75:1,74	1/1:112:0,112	0/0:133:133,0	1/1:110:0,110	1/1:84:0,84	1/1:98:1,97	0/0:112:112,0	0/0:140:140,0	0/0:105:105,0	0/0:117:116,1	0/0:96:96,0	0/0:88:88,0	0/0:118:118,0	0/0:107:107,0	0/0:84:84,0	0/0:127:127,0	0/0:131:131,0	0/0:67:67,0	0/0:118:118,0	0/0:101:101,0	0/0:42:42,0	0/0:60:60,0	0/0:126:126,0	0/0:84:84,0	1/1:77:0,77	0/0:77:77,0	0/0:113:113,0	0/0:146:146,0	0/0:93:93,0
MockRefGenome	34208	.	C	A	.	PASS	AC=98;AF=0.490;DP=9713;AV=98.17;NS=94	GT:DP:AD	1/1:129:0,129	0/0:269:269,0	0/0:153:153,0	0/0:337:337,0	1/1:163:1,162	1/1:117:1,116	1/1:160:1,159	./.:0:.,.	0/0:305:305,0	0/0:73:73,0	0/0:138:137,1	1/1:156:0,156	0/0:74:73,1	0/0:110:110,0	1/1:132:0,132	0/0:109:109,0	0/0:81:81,0	0/0:98:97,1	./.:0:.,.	1/1:140:0,140	1/1:104:0,104	1/1:117:1,116	1/1:94:0,94	1/1:87:0,87	0/0:118:118,0	1/1:107:1,106	0/0:84:83,1	1/1:126:0,126	1/1:128:1,127	1/1:66:0,66	0/0:116:116,0	1/1:101:0,101	0/0:42:42,0	0/0:60:60,0	1/1:124:0,124	1/1:84:0,84	0/0:77:77,0	./.:0:.,.	1/1:111:0,111	1/1:143:0,143	./.:0:.,.
MockRefGenome	35011	.	T	G	.	PASS	AC=18;AF=0.090;DP=5302;AV=58.96;NS=89	GT:DP:AD	./.:0:.,.	0/0:33:33,0	1/1:13:0,13	./.:0:.,.	0/0:164:164,0	0/0:85:85,0	0/0:67:66,1	0/0:10:10,0	0/0:68:68,0	./.:0:.,.	0/0:22:22,0	0/0:26:26,0	0/0:70:70,0	0/0:48:48,0	0/0:317:317,0	0/0:35:35,0	0/0:13:13,0	0/0:20:20,0	0/0:19:19,0	0/0:60:59,1	0/0:61:60,1	0/0:145:145,0	0/0:166:166,0	0/0:45:45,0	1/1:67:0,67	0/0:53:53,0	1/1:95:1,94	0/0:213:213,0	0/0:95:95,0	0/0:101:101,0	1/1:59:1,58	0/0:103:103,0	0/0:24:24,0	0/0:41:41,0	0/0:51:51,0	./.:0:.,.	0/0:70:70,0	1/1:82:1,81	0/0:180:180,0	0/0:225:225,0	0/0:62:62,0
MockRefGenome	36060	.	T	C	.	PASS	AC=16;AF=0.080;DP=13698;AV=135.19;NS=96	GT:DP:AD	1/1:215:0,215	0/0:420:420,0	0/0:241:241,0	0/0:535:535,0	0/0:205:204,1	0/0:189:189,0	0/0:208:208,0	0/0:119:119,0	0/0:336:335,1	0/0:110:110,0	0/0:162:162,0	0/0:163:163,0	0/0:102:102,0	0/0:136:136,0	0/0:219:218,1	0/0:133:133,0	0/0:110:110,0	0/0:125:125,0	0/0:128:128,0	0/0:175:175,0	0/0:115:115,0	0/0:146:146,0	0/0:196:195,1	0/0:121:120,1	0/0:165:165,0	0/0:113:113,0	0/0:92:92,0	0/0:188:188,0	0/0:215:215,0	0/0:165:165,0	0/0:164:164,0	0/0:156:156,0	0/0:67:67,0	0/0:96:96,0	0/0:162:162,0	0/0:133:133,0	0/0:87:87,0	0/0:78:78,0	0/0:142:142,0	0/0:251:251,0	0/0:101:101,0
MockRefGenome	39939	.	G	T	.	PASS	AC=98;AF=0.490;DP=7841;AV=79.18;NS=96	GT:DP:AD	1/1:85:85,0	0/0:175:0,175	0/0:91:0,91	0/0:260:0,260	1/1:142:142,0	1/1:97:97,0	1/1:109:108,1	0/0:75:0,75	0/0:232:1,231	0/0:64:0,64	0/0:117:1,116	1/1:115:115,0	0/0:52:0,52	0/0:87:1,86	1/1:132:132,0	0/0:74:0,74	0/0:61:0,61	0/0:75:0,75	./.:0:.,.	1/1:99:99,0	1/1:68:67,1	1/1:66:66,0	1/1:75:75,0	1/1:70:70,0	0/0:110:0,110	1/1:91:91,0	0/0:71:1,70	1/1:156:156,0	1/1:115:115,0	1/1:61:60,1	0/0:96:0,96	1/1:99:99,0	0/0:30:0,30	0/0:53:1,52	1/1:94:94,0	1/1:61:61,0	0/0:74:0,74	0/0:58:1,57	1/1:66:66,0	1/1:130:130,0	0/0:52:0,52
MockRefGenome	40008	.	T	G	.	PASS	AC=72;AF=0.360;DP=8303;AV=83.78;NS=99	GT:DP:AD	0/0:86:86,0	1/1:177:0,177	0/0:91:91,0	1/1:262:0,262	0/0:163:163,0	0/0:101:101,0	0/0:116:116,0	1/1:76:0,76	0/0:248:248,0	1/1:69:0,69	1/1:120:0,120	0/0:126:126,0	1/1:55:0,55	1/1:92:1,91	0/0:141:141,0	1/1:76:0,76	1/1:67:0,67	1/1:76:0,76	0/0:95:95,0	0/0:107:107,0	0/0:76:76,0	0/0:69:69,0	0/0:82:82,0	0/0:79:79,0	0/0:115:115,0	0/0:96:96,0	0/0:74:74,0	0/0:166:166,0	0/0:122:122,0	0/0:64:64,0	0/0:102:102,0	0/0:109:109,0	0/0:30:29,1	0/0:54:54,0	0/0:98:98,0	0/0:69:69,0	1/1:76:0,76	0/0:60:60,0	0/0:74:74,0	0/0:136:136,0	0/0:54:54,0
MockRefGenome	40130	.	A	C	.	PASS	AC=16;AF=0.080;DP=3130;AV=40.77;NS=74	GT:DP:AD	./.:0:.,.	0/0:12:12,0	./.:0:.,.	./.:0:.,.	0/0:77:76,1	0/0:30:30,0	0/0:28:28,0	./.:0:.,.	0/0:60:60,0	./.:0:.,.	./.:0:.,.	0/0:24:24,0	0/0:16:16,0	0/0:11:11,0	0/0:179:179,0	0/0:13:13,0	./.:0:.,.	0/0:19:19,0	./.:0:.,.	0/0:25:25,0	0/0:25:24,1	0/0:47:47,0	0/0:106:106,0	0/0:35:35,0	1/1:41:0,41	0/0:56:56,0	1/1:34:0,34	0/0:120:120,0	0/0:56:56,0	0/0:58:58,0	1/1:26:0,26	0/0:72:72,0	0/0:22:22,0	0/0:34:34,0	0/0:24:24,0	./.:0:.,.	0/0:26:26,0	1/1:32:0,32	0/0:76:76,0	0/0:177:177,0	0/0:81:81,0
MockRefGenome	40793	.	A	C	.	PASS	AC=12;AF=0.060;DP=4299;AV=46.17;NS=92	GT:DP:AD	0/0:28:28,0	0/0:68:68,0	0/0:56:56,0	0/0:44:44,0	0/0:97:97,0	1/1:96:0,96	0/0:108:108,0	0/0:39:39,0	0/0:106:106,0	./.:0:.,.	0/0:66:66,0	1/1:63:0,63	0/0:43:43,0	0/0:60:60,0	0/0:98:98,0	0/0:60:60,0	0/0:28:28,0	0/0:39:39,0	0/0:22:22,0	0/0:74:74,0	0/0:61:61,0	0/0:74:74,0	0/0:43:43,0	0/0:48:48,0	0/0:63:63,0	1/1:39:0,39	0/0:34:34,0	0/0:69:69,0	0/0:90:90,0	0/0:58:58,0	0/0:50:50,0	0/0:93:93,0	0/0:17:17,0	0/0:25:25,0	0/0:47:47,0	0/0:12:12,0	0/0:36:36,0	0/0:32:32,0	0/0:61:61,0	0/0:89:89,0	0/0:39:39,0
MockRefGenome	41601	.	T	G	.	PASS	AC=22;AF=0.110;DP=5273;AV=54.13;NS=97	GT:DP:AD	1/1:13:0,13	0/0:75:75,0	0/0:77:77,0	0/0:187:187,0	0/0:100:100,0	0/0:68:68,0	0/0:76:76,0	0/0:14:14,0	0/0:174:173,1	0/0:29:29,0	0/0:50:50,0	0/0:76:76,0	0/0:73:73,0	0/0:53:53,0	0/0:118:118,0	0/0:31:31,0	0/0:27:27,0	0/0:57:57,0	0/0:35:35,0	0/0:64:64,0	0/0:54:54,0	0/0:90:90,0	0/0:32:32,0	0/0:26:26,0	0/0:87:87,0	0/0:84:84,0	0/0:44:44,0	0/0:84:83,1	0/0:59:59,0	0/0:56:56,0	0/0:57:57,0	0/0:60:60,0	0/0:18:18,0	0/0:33:33,0	0/0:28:28,0	0/0:62:62,0	0/0:34:34,0	0/0:39:39,0	0/0:100:100,0	0/0:94:94,0	0/0:75:75,0
MockRefGenome	41671	.	A	G	.	PASS	AC=32;AF=0.160;DP=5851;AV=59.51;NS=98	GT:DP:AD	1/1:13:0,13	0/0:93:93,0	0/0:92:92,0	0/0:212:212,0	0/0:109:109,0	0/0:74:74,0	0/0:90:90,0	0/0:14:14,0	1/1:181:1,180	0/0:36:36,0	0/0:54:54,0	0/0:87:86,1	0/0:79:79,0	0/0:58:58,0	0/0:138:138,0	0/0:32:32,0	0/0:32:32,0	0/0:65:65,0	1/1:35:0,35	0/0:70:70,0	0/0:60:60,0	0/0:100:100,0	0/0:37:37,0	0/0:30:30,0	0/0:98:98,0	0/0:94:93,1	0/0:45:45,0	0/0:92:91,1	0/0:65:65,0	0/0:65:65,0	0/0:70:70,0	0/0:69:69,0	0/0:23:23,0	0/0:37:37,0	0/0:28:28,0	0/0:63:63,0	0/0:37:37,0	0/0:42:42,0	0/0:109:109,0	0/0:108:108,0	1/1:79:0,79
MockRefGenome	41673	.	T	G	.	PASS	AC=10;AF=0.050;DP=5849;AV=59.54;NS=98	GT:DP:AD	0/0:13:13,0	0/0:93:93,0	1/1:92:0,92	0/0:212:212,0	0/0:109:109,0	0/0:74:74,0	0/0:90:90,0	0/0:14:14,0	0/0:181:181,0	0/0:36:36,0	0/0:54:54,0	0/0:87:87,0	0/0:79:79,0	0/0:58:58,0	0/0:138:138,0	0/0:32:32,0	0/0:32:32,0	0/0:65:65,0	0/0:35:35,0	0/0:70:70,0	0/0:60:60,0	0/0:100:100,0	0/0:37:37,0	0/0:30:30,0	1/1:98:0,98	0/0:94:94,0	0/0:45:45,0	0/0:92:92,0	0/0:65:65,0	0/0:65:65,0	1/1:70:0,70	0/0:68:68,0	0/0:23:23,0	0/0:36:36,0	0/0:28:28,0	0/0:63:63,0	0/0:37:37,0	1/1:42:0,42	0/0:109:109,0	0/0:108:108,0	0/0:79:79,0
MockRefGenome	45637	.	A	G	.	PASS	AC=51;AF=0.255;DP=4403;AV=46.80;NS=86	GT:DP:AD	./.:0:.,.	0/0:234:234,0	0/0:47:47,0	1/1:65:1,64	0/0:59:59,0	0/0:73:73,0	0/0:38:38,0	0/0:42:42,0	0/0:48:48,0	0/0:60:59,1	0/0:63:62,1	0/0:40:40,0	0/0:149:149,0	0/0:92:92,0	0/0:71:71,0	0/0:75:75,0	0/0:91:91,0	0/0:81:81,0	0/0:33:33,0	0/0:32:32,0	0/0:43:43,0	0/0:62:62,0	0/0:41:41,0	0/0:38:38,0	0/0:41:41,0	0/0:64:64,0	0/0:39:39,0	0/0:109:108,1	0/0:38:38,0	0/0:34:34,0	0/0:31:31,0	0/0:37:37,0	0/0:59:58,1	0/0:71:71,0	0/0:36:36,0	0/0:15:15,0	0/0:81:81,0	0/1:33:4,29	./.:0:.,.	0/1:34:9,25	0/1:32:10,22
MockRefGenome	47636	.	T	G	.	PASS	AC=8;AF=0.040;DP=2683;AV=33.70;NS=76	GT:DP:AD	./.:0:.,.	0/0:22:22,0	./.:0:.,.	./.:0:.,.	0/0:72:72,0	0/0:68:68,0	0/0:20:20,0	./.:0:.,.	0/0:34:34,0	./.:0:.,.	0/0:14:14,0	0/0:13:13,0	0/0:56:56,0	0/0:53:53,0	0/0:108:108,0	./.:0:.,.	./.:0:.,.	0/0:20:20,0	./.:0:.,.	0/0:27:27,0	0/0:33:33,0	0/0:107:107,0	0/0:45:45,0	1/1:14:0,14	0/0:51:51,0	0/0:26:26,0	0/0:37:37,0	0/0:80:80,0	0/0:28:28,0	0/0:35:35,0	0/0:18:18,0	0/0:26:26,0	0/0:18:18,0	0/0:21:21,0	0/0:19:19,0	./.:0:.,.	0/0:43:43,0	0/0:34:34,0	0/0:76:76,0	1/1:124:1,123	0/0:30:30,0
MockRefGenome	50703	.	C	T	.	PASS	AC=27;AF=0.135;DP=5037;AV=52.32;NS=92	GT:DP:AD	0/0:78:78,0	0/0:685:685,0	0/1:96:62,34	0/0:248:248,0	0/0:53:53,0	0/1:78:49,29	0/1:55:50,5	0/0:36:36,0	0/1:40:21,19	0/0:72:72,0	0/0:43:43,0	0/1:70:32,38	0/0:90:90,0	0/0:79:79,0	0/1:57:46,11	0/0:45:45,0	0/0:50:50,0	0/0:62:61,1	0/1:14:6,8	0/1:30:10,20	0/1:56:14,42	0/1:89:55,34	0/1:29:21,8	0/1:30:20,10	0/1:40:28,12	0/1:32:28,4	0/1:50:25,25	0/1:87:33,54	0/0:64:64,0	0/0:37:37,0	0/1:64:39,25	0/0:33:33,0	0/0:46:46,0	0/0:44:44,0	0/0:44:44,0	0/0:35:35,0	0/0:59:59,0	0/0:31:31,0	0/0:32:31,1	./.:0:.,.	0/0:29:29,0
MockRefGenome	50705	.	G	A	.	PASS	AC=16;AF=0.080;DP=5026;AV=51.57;NS=90	GT:DP:AD	0/1:78:55,23	0/0:684:684,0	./.:0:.,.	0/0:248:248,0	0/1:53:20,33	0/0:78:78,0	0/0:45:45,0	./.:0:.,.	0/0:40:40,0	./.:0:.,.	0/0:43:43,0	0/0:70:70,0	./.:0:.,.	0/1:79:47,32	0/0:57:57,0	0/0:45:44,1	0/0:50:50,0	0/0:62:61,1	0/0:14:14,0	0/0:30:30,0	0/0:56:56,0	0/0:89:89,0	0/0:29:28,1	0/0:30:29,1	./.:0:.,.	0/0:32:32,0	0/0:50:50,0	0/0:86:86,0	0/1:64:27,37	0/1:37:10,27	0/0:64:64,0	0/0:33:32,1	0/0:46:46,0	0/1:44:38,6	0/1:44:22,22	0/1:35:9,26	0/1:59:47,12	0/0:31:30,1	0/0:32:32,0	0/0:35:35,0	0/0:29:28,1
MockRefGenome	50988	.	T	G	.	PASS	AC=16;AF=0.080;DP=2561;AV=30.59;NS=80	GT:DP:AD	0/0:18:18,0	0/0:48:48,0	0/0:43:43,0	0/0:165:165,0	0/0:14:14,0	0/0:35:35,0	0/0:31:31,0	./.:0:.,.	0/0:50:50,0	0/0:109:109,0	0/0:33:32,1	0/0:26:26,0	0/0:39:39,0	0/0:44:44,0	0/0:23:23,0	0/0:11:11,0	0/0:11:11,0	0/0:25:25,0	0/0:26:26,0	0/0:18:18,0	0/0:26:26,0	0/0:61:61,0	0/0:10:10,0	./.:0:.,.	0/0:24:24,0	0/0:31:31,0	0/0:21:21,0	0/0:23:23,0	./.:0:.,.	0/0:12:12,0	0/0:24:24,0	./.:0:.,.	./.:0:.,.	./.:0:.,.	0/0:19:19,0	0/0:34:34,0	0/0:26:26,0	0/0:24:24,0	0/0:32:32,0	0/0:20:20,0	0/0:35:35,0
MockRefGenome	52578	.	A	G	.	PASS	AC=37;AF=0.185;DP=7129;AV=84.35;NS=77	GT:DP:AD	1/1:27:0,27	0/0:808:808,0	0/0:43:43,0	./.:0:.,.	0/0:134:134,0	0/0:57:57,0	0/0:190:189,1	0/0:63:62,1	0/0:54:54,0	0/0:87:87,0	0/0:81:81,0	0/0:143:143,0	0/0:317:317,0	0/0:313:313,0	0/0:93:93,0	0/0:75:75,0	0/0:101:100,1	0/0:157:157,0	0/0:69:69,0	0/0:45:44,1	0/0:115:115,0	0/0:102:102,0	0/0:32:32,0	0/0:103:103,0	0/0:128:128,0	0/0:97:97,0	0/0:109:109,0	0/0:166:166,0	./.:0:.,.	0/0:73:73,0	0/0:77:77,0	0/0:86:86,0	0/1:118:84,34	0/1:53:45,8	0/0:93:93,0	0/0:99:99,0	0/0:265:265,0	./.:0:.,.	0/1:37:7,30	0/1:13:6,7	0/1:31:14,17
MockRefGenome	52605	.	A	G	.	PASS	AC=35;AF=0.175;DP=7204;AV=84.71;NS=77	GT:DP:AD	1/1:27:0,27	0/0:860:860,0	0/0:43:43,0	./.:0:.,.	0/0:134:134,0	0/0:57:57,0	0/0:190:189,1	0/0:63:62,1	0/0:54:54,0	0/0:87:87,0	0/0:81:81,0	0/0:143:143,0	0/0:317:317,0	0/0:313:313,0	0/0:93:93,0	0/0:82:82,0	0/0:101:100,1	0/0:157:157,0	0/0:69:68,1	0/0:45:45,0	0/0:114:114,0	0/0:102:102,0	0/0:32:32,0	0/0:103:103,0	0/0:128:128,0	0/0:97:97,0	0/0:109:109,0	0/0:166:166,0	0/0:71:70,1	0/0:73:73,0	0/0:77:77,0	0/0:86:86,0	./.:0:.,.	0/0:53:53,0	0/0:93:93,0	0/0:99:99,0	0/0:291:291,0	./.:0:.,.	0/1:37:6,31	0/1:13:6,7	0/1:31:14,17
MockRefGenome	53563	.	C	T	.	PASS	AC=18;AF=0.090;DP=4416;AV=45.09;NS=92	GT:DP:AD	0/1:91:55,36	0/0:527:527,0	./.:0:.,.	0/0:153:153,0	0/1:70:28,42	0/0:37:37,0	0/0:45:45,0	0/0:47:47,0	0/0:28:28,0	./.:0:.,.	0/0:65:65,0	0/0:15:15,0	0/1:106:96,10	0/1:67:46,21	0/0:36:36,0	0/1:42:38,4	0/0:58:58,0	0/0:57:57,0	0/0:16:16,0	0/0:19:19,0	./.:0:.,.	0/0:44:44,0	0/0:26:26,0	0/0:19:19,0	./.:0:.,.	0/0:22:22,0	0/0:30:30,0	0/0:41:41,0	0/1:122:48,74	0/1:67:19,48	0/0:66:66,0	0/1:39:35,4	0/0:37:36,1	./.:0:.,.	0/1:69:27,42	0/1:67:16,51	0/1:50:44,6	0/0:33:33,0	0/0:38:38,0	0/0:28:28,0	0/0:19:19,0
MockRefGenome	53598	.	T	C	.	PASS	AC=10;AF=0.050;DP=4423;AV=45.46;NS=96	GT:DP:AD	0/0:91:91,0	0/0:527:527,0	0/0:78:78,0	0/0:154:154,0	0/1:70:29,41	0/0:37:37,0	0/0:52:52,0	0/0:47:47,0	0/0:28:28,0	0/0:84:84,0	0/0:65:65,0	0/0:15:15,0	0/0:106:106,0	0/0:67:67,0	0/0:36:36,0	0/0:42:42,0	0/0:58:58,0	0/0:57:57,0	0/0:16:16,0	0/0:19:19,0	0/0:14:14,0	0/0:44:44,0	0/0:26:26,0	0/0:19:19,0	0/0:51:51,0	0/0:22:22,0	0/0:30:30,0	./.:0:.,.	0/1:122:48,74	0/1:67:19,48	0/0:66:66,0	0/1:39:35,4	0/0:37:36,1	0/0:19:19,0	0/1:69:27,42	0/1:67:15,52	0/0:50:50,0	0/0:33:33,0	0/0:38:38,0	0/0:28:28,0	0/0:19:19,0
MockRefGenome	56591	.	A	C	.	PASS	AC=16;AF=0.080;DP=2589;AV=31.58;NS=78	GT:DP:AD	0/0:23:23,0	0/0:68:68,0	0/0:47:47,0	0/0:261:261,0	0/0:24:24,0	0/0:26:26,0	0/0:29:29,0	./.:0:.,.	0/0:84:84,0	0/0:71:71,0	0/0:17:17,0	0/0:36:36,0	0/0:22:22,0	0/0:23:23,0	0/0:18:18,0	./.:0:.,.	./.:0:.,.	0/0:25:25,0	0/0:22:22,0	0/0:14:14,0	0/0:11:11,0	0/0:44:44,0	./.:0:.,.	0/0:11:11,0	0/0:22:22,0	0/0:43:43,0	./.:0:.,.	0/0:31:31,0	0/0:10:10,0	0/0:15:15,0	0/0:14:14,0	./.:0:.,.	0/0:11:11,0	0/0:19:19,0	0/0:13:13,0	0/0:41:41,0	0/0:21:21,0	0/0:15:15,0	0/0:34:34,0	0/0:19:19,0	0/0:32:32,0
MockRefGenome	58510	.	T	G	.	PASS	AC=12;AF=0.060;DP=1994;AV=26.14;NS=70	GT:DP:AD	0/0:13:13,0	0/0:52:52,0	0/0:17:17,0	0/0:29:29,0	0/0:38:38,0	1/1:18:0,18	0/0:35:35,0	./.:0:.,.	0/0:80:80,0	./.:0:.,.	0/0:12:12,0	1/1:35:0,35	./.:0:.,.	./.:0:.,.	0/0:50:50,0	0/0:17:17,0	0/0:17:17,0	0/0:18:18,0	./.:0:.,.	0/0:24:24,0	0/0:25:25,0	0/0:20:20,0	0/0:18:18,0	0/0:15:15,0	0/0:12:12,0	1/1:26:0,26	0/0:14:14,0	0/0:49:49,0	0/0:31:31,0	0/0:27:27,0	0/0:19:19,0	0/0:33:33,0	./.:0:.,.	0/0:17:17,0	0/0:17:17,0	./.:0:.,.	./.:0:.,.	./.:0:.,.	0/0:28:28,0	0/0:70:70,0	0/0:30:30,0
MockRefGenome	59397	.	T	G	.	PASS	AC=40;AF=0.200;DP=1376;AV=21.17;NS=53	GT:DP:AD	0/0:10:10,0	1/1:68:0,68	0/0:10:10,0	1/1:109:0,109	0/0:12:12,0	0/0:28:28,0	0/0:27:27,0	./.:0:.,.	0/0:34:34,0	./.:0:.,.	./.:0:.,.	0/0:28:28,0	./.:0:.,.	./.:0:.,.	0/0:12:12,0	./.:0:.,.	1/1:15:0,15	1/1:22:1,21	0/0:18:18,0	0/0:11:11,0	./.:0:.,.	0/0:16:16,0	0/0:10:10,0	./.:0:.,.	0/0:24:24,0	0/0:13:13,0	./.:0:.,.	0/0:22:22,0	0/0:12:12,0	./.:0:.,.	./.:0:.,.	./.:0:.,.	0/0:12:12,0	./.:0:.,.	./.:0:.,.	./.:0:.,.	./.:0:.,.	./.:0:.,.	0/0:13:13,0	./.:0:.,.	0/0:15:15,0
MockRefGenome	59425	.	T	G	.	PASS	AC=48;AF=0.240;DP=1373;AV=20.25;NS=55	GT:DP:AD	0/0:10:0,10	1/1:67:67,0	0/0:10:0,10	1/1:105:105,0	./.:0:.,.	0/0:32:1,31	0/0:24:0,24	1/1:14:14,0	0/0:34:0,34	1/1:14:14,0	./.:0:.,.	0/0:27:0,27	1/1:12:12,0	1/1:15:15,0	0/0:11:0,11	./.:0:.,.	1/1:16:16,0	1/1:24:23,1	0/0:19:0,19	0/0:13:0,13	./.:0:.,.	0/0:21:0,21	0/0:10:0,10	./.:0:.,.	0/0:23:0,23	0/0:14:0,14	./.:0:.,.	0/0:21:0,21	./.:0:.,.	./.:0:.,.	./.:0:.,.	./.:0:.,.	0/0:10:0,10	./.:0:.,.	./.:0:.,.	./.:0:.,.	1/1:12:12,0	./.:0:.,.	0/0:11:0,11	./.:0:.,.	0/0:13:0,13
MockRefGenome	59519	.	T	G	.	PASS	AC=28;AF=0.140;DP=1482;AV=21.21;NS=58	GT:DP:AD	0/0:10:10,0	0/0:69:69,0	0/0:10:10,0	1/1:110:0,110	0/0:13:13,0	0/0:32:32,0	0/0:27:27,0	0/0:16:16,0	0/0:36:36,0	0/0:16:16,0	./.:0:.,.	0/0:29:29,0	0/0:12:12,0	0/0:18:18,0	0/0:11:11,0	./.:0:.,.	1/1:17:0,17	1/1:24:1,23	0/0:20:20,0	0/0:14:14,0	./.:0:.,.	0/0:22:22,0	0/0:10:10,0	./.:0:.,.	0/0:24:24,0	0/0:14:14,0	./.:0:.,.	0/0:22:22,0	0/0:12:12,0	./.:0:.,.	./.:0:.,.	./.:0:.,.	0/0:13:13,0	./.:0:.,.	./.:0:.,.	./.:0:.,.	0/0:12:12,0	./.:0:.,.	0/0:12:12,0	./.:0:.,.	0/0:14:14,0
MockRefGenome	59564	.	T	G	.	PASS	AC=8;AF=0.040;DP=1497;AV=20.95;NS=60	GT:DP:AD	0/0:10:10,0	0/0:69:69,0	0/0:10:10,0	0/0:110:110,0	0/0:13:13,0	0/0:32:32,0	1/1:28:1,27	0/0:16:16,0	0/0:36:36,0	0/0:16:16,0	./.:0:.,.	0/0:29:29,0	0/0:12:12,0	0/0:18:18,0	0/0:12:12,0	./.:0:.,.	0/0:17:17,0	0/0:24:23,1	0/0:20:20,0	0/0:14:14,0	./.:0:.,.	0/0:22:22,0	0/0:10:10,0	./.:0:.,.	0/0:24:24,0	0/0:14:14,0	./.:0:.,.	0/0:22:22,0	0/0:12:12,0	./.:0:.,.	./.:0:.,.	./.:0:.,.	0/0:13:13,0	./.:0:.,.	./.:0:.,.	./.:0:.,.	0/0:12:12,0	./.:0:.,.	1/1:13:0,13	./.:0:.,.	0/0:15:15,0
MockRefGenome	62975	.	G	A	.	PASS	AC=10;AF=0.050;DP=1181;AV=18.73;NS=56	GT:DP:AD	0/0:19:19,0	0/0:88:88,0	./.:0:.,.	0/0:54:54,0	0/0:12:12,0	./.:0:.,.	./.:0:.,.	0/0:17:17,0	./.:0:.,.	0/0:30:30,0	0/0:17:17,0	0/0:20:20,0	0/0:31:31,0	0/0:30:30,0	./.:0:.,.	0/0:21:21,0	0/0:34:34,0	0/0:21:21,0	./.:0:.,.	1/1:13:0,13	./.:0:.,.	0/1:6:3,3	./.:0:.,.	./.:0:.,.	./.:0:.,.	./.:0:.,.	./.:0:.,.	0/0:21:21,0	0/0:13:13,0	./.:0:.,.	0/0:10:10,0	./.:0:.,.	0/1:10:4,6	0/0:17:17,0	./.:0:.,.	./.:0:.,.	0/0:25:25,0	./.:0:.,.	./.:0:.,.	0/0:20:20,0	./.:0:.,.
MockRefGenome	63094	.	C	G	.	PASS	AC=33;AF=0.165;DP=1437;AV=22.41;NS=59	GT:DP:AD	0/1:40:16,24	0/0:75:75,0	./.:0:.,.	0/1:100:50,50	0/0:10:10,0	./.:0:.,.	./.:0:.,.	0/0:17:17,0	./.:0:.,.	0/0:29:29,0	0/0:16:16,0	0/0:20:20,0	0/0:27:27,0	0/0:29:29,0	./.:0:.,.	0/0:20:20,0	0/0:33:33,0	0/0:19:19,0	./.:0:.,.	0/0:12:12,0	./.:0:.,.	./.:0:.,.	./.:0:.,.	./.:0:.,.	./.:0:.,.	./.:0:.,.	./.:0:.,.	0/0:20:20,0	0/0:12:12,0	./.:0:.,.	0/0:10:10,0	./.:0:.,.	./.:0:.,.	0/0:16:16,0	./.:0:.,.	./.:0:.,.	0/0:22:22,0	0/1:14:9,5	0/1:19:6,13	0/1:28:19,9	0/1:11:4,7
MockRefGenome	63112	.	G	A	.	PASS	AC=33;AF=0.165;DP=1469;AV=22.43;NS=61	GT:DP:AD	0/1:40:16,24	0/0:78:78,0	./.:0:.,.	0/1:104:52,52	0/0:11:11,0	./.:0:.,.	./.:0:.,.	0/0:18:18,0	./.:0:.,.	0/0:29:29,0	0/0:16:16,0	0/0:20:20,0	0/0:27:27,0	0/0:29:29,0	./.:0:.,.	0/0:20:20,0	0/0:33:32,1	0/0:20:20,0	./.:0:.,.	0/0:12:12,0	./.:0:.,.	./.:0:.,.	./.:0:.,.	./.:0:.,.	./.:0:.,.	./.:0:.,.	./.:0:.,.	0/0:20:20,0	0/0:12:12,0	./.:0:.,.	0/0:10:10,0	./.:0:.,.	0/0:10:10,0	0/0:16:16,0	./.:0:.,.	./.:0:.,.	0/0:25:25,0	0/1:14:9,5	0/1:19:6,13	0/1:28:19,9	0/1:11:4,7
MockRefGenome	63115	.	G	C	.	PASS	AC=33;AF=0.165;DP=1485;AV=22.69;NS=61	GT:DP:AD	0/1:42:17,25	0/0:79:79,0	./.:0:.,.	0/1:106:52,54	0/0:11:11,0	./.:0:.,.	./.:0:.,.	0/0:18:18,0	./.:0:.,.	0/0:29:29,0	0/0:16:16,0	0/0:20:20,0	0/0:27:27,0	0/0:30:30,0	./.:0:.,.	0/0:20:20,0	0/0:33:33,0	0/0:20:20,0	./.:0:.,.	0/0:12:12,0	./.:0:.,.	./.:0:.,.	./.:0:.,.	./.:0:.,.	./.:0:.,.	./.:0:.,.	./.:0:.,.	0/0:20:20,0	0/0:12:12,0	./.:0:.,.	0/0:10:10,0	./.:0:.,.	0/0:10:10,0	0/0:16:16,0	./.:0:.,.	./.:0:.,.	0/0:25:25,0	0/1:14:9,5	0/1:19:6,13	0/1:29:19,10	0/1:11:4,7
MockRefGenome	63157	.	A	C	.	PASS	AC=33;AF=0.165;DP=1587;AV=23.44;NS=63	GT:DP:AD	0/1:45:19,26	0/0:86:86,0	./.:0:.,.	0/1:113:54,59	0/0:12:12,0	./.:0:.,.	./.:0:.,.	0/0:18:18,0	./.:0:.,.	0/0:29:29,0	0/0:16:16,0	0/0:20:20,0	0/0:30:30,0	0/0:31:31,0	./.:0:.,.	0/0:22:22,0	0/0:34:34,0	0/0:21:21,0	./.:0:.,.	0/0:13:13,0	./.:0:.,.	./.:0:.,.	./.:0:.,.	./.:0:.,.	./.:0:.,.	./.:0:.,.	./.:0:.,.	0/0:21:21,0	0/0:14:14,0	./.:0:.,.	0/0:10:10,0	./.:0:.,.	0/0:10:10,0	0/0:17:17,0	./.:0:.,.	./.:0:.,.	0/0:25:25,0	0/1:14:9,5	0/1:20:7,13	0/1:29:19,10	0/1:11:4,7
MockRefGenome	64471	.	G	A	.	PASS	AC=38;AF=0.190;DP=1438;AV=20.91;NS=57	GT:DP:AD	0/1:49:27,22	0/0:25:25,0	1/1:24:0,24	0/0:92:92,0	0/0:18:18,0	1/1:11:0,11	./.:0:.,.	./.:0:.,.	0/0:31:31,0	./.:0:.,.	./.:0:.,.	1/1:13:0,13	0/0:12:12,0	0/0:13:13,0	1/1:11:0,11	./.:0:.,.	./.:0:.,.	./.:0:.,.	0/1:14:10,4	1/1:13:0,13	0/1:12:3,9	./.:0:.,.	./.:0:.,.	./.:0:.,.	0/1:26:9,17	1/1:15:0,15	./.:0:.,.	0/1:21:14,7	1/1:12:0,12	0/1:26:20,6	0/0:20:20,0	0/1:23:15,8	0/1:8:3,5	0/1:22:7,15	0/1:39:31,8	0/1:21:17,4	./.:0:.,.	./.:0:.,.	./.:0:.,.	0/1:7:3,4	./.:0:.,.
MockRefGenome	64859	.	T	C	.	PASS	AC=20;AF=0.100;DP=1852;AV=24.15;NS=71	GT:DP:AD	0/0:26:26,0	0/0:34:34,0	1/1:28:0,28	0/0:71:71,0	0/0:38:38,0	0/0:28:28,0	0/0:35:35,0	0/0:19:19,0	0/0:55:55,0	0/0:17:17,0	0/0:21:21,0	0/0:19:19,0	0/0:14:14,0	0/0:23:23,0	0/0:32:32,0	0/0:20:20,0	0/0:21:21,0	0/0:20:20,0	0/0:10:10,0	0/0:44:44,0	0/0:28:28,0	0/0:23:23,0	0/0:23:23,0	0/0:12:12,0	1/1:22:0,22	0/0:16:16,0	1/1:26:1,25	0/0:38:38,0	0/0:30:30,0	0/0:18:18,0	1/1:27:0,27	0/0:28:28,0	./.:0:.,.	1/1:10:0,10	0/0:21:21,0	0/0:17:17,0	0/0:11:11,0	1/1:11:0,11	0/0:28:28,0	0/0:41:41,0	0/0:15:15,0
MockRefGenome	66552	.	A	C	.	PASS	AC=8;AF=0.040;DP=1659;AV=21.35;NS=68	GT:DP:AD	0/0:33:33,0	0/0:51:51,0	0/0:22:22,0	0/0:77:77,0	0/0:16:16,0	0/0:30:30,0	1/1:28:0,28	0/0:26:26,0	0/0:35:35,0	0/0:45:45,0	0/0:21:21,0	0/0:19:19,0	./.:0:.,.	0/0:25:25,0	0/0:15:15,0	0/0:15:15,0	0/0:23:23,0	0/0:19:19,0	0/0:20:20,0	0/0:19:19,0	./.:0:.,.	0/0:23:23,0	0/0:14:14,0	0/0:16:16,0	0/0:21:21,0	./.:0:.,.	0/0:11:11,0	0/0:17:17,0	0/0:25:25,0	0/0:23:23,0	0/0:21:21,0	0/0:13:13,0	./.:0:.,.	./.:0:.,.	0/0:11:11,0	0/0:19:19,0	0/0:14:14,0	./.:0:.,.	1/1:22:0,22	0/0:17:17,0	0/0:19:19,0
MockRefGenome	66597	.	A	C	.	PASS	AC=30;AF=0.150;DP=1655;AV=21.37;NS=67	GT:DP:AD	0/0:33:33,0	0/0:51:51,0	0/0:22:22,0	1/1:76:0,76	0/0:16:16,0	0/0:30:30,0	0/0:28:28,0	0/0:26:26,0	0/0:35:35,0	0/0:45:45,0	0/0:21:21,0	0/0:19:19,0	./.:0:.,.	0/0:25:24,1	0/0:15:15,0	0/0:15:15,0	1/1:23:0,23	1/1:18:0,18	0/0:20:20,0	0/0:19:19,0	./.:0:.,.	0/0:23:23,0	0/0:14:14,0	0/0:16:16,0	0/0:21:21,0	./.:0:.,.	0/0:11:11,0	0/0:17:17,0	0/0:25:25,0	0/0:23:23,0	0/0:21:21,0	0/0:13:13,0	./.:0:.,.	./.:0:.,.	0/0:11:11,0	0/0:19:19,0	0/0:14:14,0	./.:0:.,.	0/0:22:22,0	0/0:17:17,0	0/0:19:19,0
MockRefGenome	66718	.	A	C	.	PASS	AC=52;AF=0.260;DP=1594;AV=20.97;NS=65	GT:DP:AD	0/0:32:32,0	1/1:50:1,49	0/0:21:21,0	1/1:77:0,77	0/0:15:15,0	0/0:30:30,0	0/0:28:28,0	1/1:24:0,24	0/0:35:35,0	1/1:44:0,44	1/1:21:0,21	0/0:19:19,0	./.:0:.,.	1/1:24:0,24	0/0:12:12,0	1/1:14:0,14	1/1:20:0,20	1/1:19:0,19	0/0:20:20,0	0/0:18:18,0	./.:0:.,.	0/0:22:22,0	0/0:14:14,0	0/0:15:15,0	0/0:21:21,0	./.:0:.,.	0/0:11:11,0	0/0:17:17,0	0/0:24:24,0	0/0:22:22,0	0/0:21:21,0	0/0:13:13,0	./.:0:.,.	./.:0:.,.	0/0:11:11,0	0/0:16:16,0	1/1:14:0,14	./.:0:.,.	0/0:20:20,0	0/0:16:16,0	0/0:19:19,0
MockRefGenome	66930	.	T	G	.	PASS	AC=24;AF=0.120;DP=1315;AV=20.43;NS=54	GT:DP:AD	0/1:34:24,10	0/0:88:88,0	./.:0:.,.	./.:0:.,.	./.:0:.,.	./.:0:.,.	./.:0:.,.	0/0:10:10,0	./.:0:.,.	0/0:16:16,0	0/0:23:23,0	0/0:25:25,0	0/0:17:17,0	0/0:19:19,0	./.:0:.,.	0/0:27:27,0	0/0:30:30,0	0/0:22:22,0	./.:0:.,.	./.:0:.,.	./.:0:.,.	./.:0:.,.	0/0:13:13,0	./.:0:.,.	./.:0:.,.	0/0:16:16,0	./.:0:.,.	0/0:25:25,0	0/0:16:16,0	./.:0:.,.	./.:0:.,.	./.:0:.,.	./.:0:.,.	./.:0:.,.	./.:0:.,.	./.:0:.,.	0/0:15:15,0	0/1:10:6,4	0/1:14:6,8	./.:0:.,.	0/1:16:10,6
MockRefGenome	66972	.	C	G	.	PASS	AC=24;AF=0.120;DP=1274;AV=20.07;NS=54	GT:DP:AD	0/1:34:24,10	0/0:88:88,0	./.:0:.,.	./.:0:.,.	./.:0:.,.	./.:0:.,.	./.:0:.,.	0/0:10:10,0	./.:0:.,.	0/0:15:15,0	0/0:23:23,0	0/0:25:25,0	0/0:13:13,0	0/0:19:19,0	./.:0:.,.	0/0:27:27,0	0/0:28:28,0	0/0:20:20,0	./.:0:.,.	./.:0:.,.	./.:0:.,.	./.:0:.,.	0/0:13:13,0	./.:0:.,.	./.:0:.,.	0/0:16:16,0	./.:0:.,.	0/0:24:24,0	0/0:16:16,0	./.:0:.,.	./.:0:.,.	./.:0:.,.	./.:0:.,.	./.:0:.,.	./.:0:.,.	./.:0:.,.	0/0:14:14,0	0/1:10:6,4	0/1:14:6,8	./.:0:.,.	0/1:16:10,6
MockRefGenome	66975	.	C	T	.	PASS	AC=24;AF=0.120;DP=1270;AV=20.80;NS=54	GT:DP:AD	0/1:34:24,10	0/0:87:87,0	./.:0:.,.	0/0:54:53,1	./.:0:.,.	./.:0:.,.	./.:0:.,.	0/0:10:10,0	./.:0:.,.	0/0:15:15,0	0/0:23:23,0	0/0:25:25,0	./.:0:.,.	0/0:19:19,0	./.:0:.,.	0/0:27:27,0	0/0:28:28,0	0/0:20:20,0	./.:0:.,.	./.:0:.,.	./.:0:.,.	./.:0:.,.	0/0:13:13,0	./.:0:.,.	./.:0:.,.	0/0:16:16,0	./.:0:.,.	0/0:24:24,0	0/0:16:16,0	./.:0:.,.	./.:0:.,.	./.:0:.,.	./.:0:.,.	./.:0:.,.	./.:0:.,.	./.:0:.,.	0/0:14:14,0	0/1:10:6,4	0/1:14:6,8	./.:0:.,.	0/1:16:10,6
MockRefGenome	66993	.	G	C	.	PASS	AC=24;AF=0.120;DP=1262;AV=20.30;NS=57	GT:DP:AD	0/1:33:23,10	0/0:87:87,0	./.:0:.,.	0/0:52:52,0	./.:0:.,.	./.:0:.,.	./.:0:.,.	0/0:10:10,0	./.:0:.,.	0/0:15:15,0	0/0:23:23,0	0/0:25:25,0	0/0:11:11,0	0/0:19:19,0	./.:0:.,.	0/0:27:27,0	0/0:27:27,0	0/0:20:20,0	./.:0:.,.	./.:0:.,.	./.:0:.,.	./.:0:.,.	0/0:13:13,0	./.:0:.,.	./.:0:.,.	0/0:16:16,0	./.:0:.,.	0/0:24:24,0	0/0:16:16,0	./.:0:.,.	./.:0:.,.	./.:0:.,.	./.:0:.,.	./.:0:.,.	./.:0:.,.	./.:0:.,.	0/0:14:14,0	0/1:10:6,4	0/1:14:6,8	./.:0:.,.	0/1:16:10,6
MockRefGenome	67112	.	C	T	.	PASS	AC=5;AF=0.025;DP=1049;AV=18.83;NS=46	GT:DP:AD	0/0:22:22,0	0/0:84:84,0	./.:0:.,.	0/0:52:52,0	./.:0:.,.	./.:0:.,.	./.:0:.,.	0/0:10:10,0	./.:0:.,.	0/0:16:16,0	0/0:23:23,0	0/0:25:25,0	0/0:14:14,0	0/0:19:19,0	./.:0:.,.	0/0:27:27,0	0/0:29:29,0	0/0:20:20,0	./.:0:.,.	./.:0:.,.	./.:0:.,.	./.:0:.,.	0/0:12:12,0	./.:0:.,.	./.:0:.,.	1/1:15:0,15	./.:0:.,.	0/0:26:26,0	./.:0:.,.	./.:0:.,.	./.:0:.,.	./.:0:.,.	./.:0:.,.	./.:0:.,.	./.:0:.,.	./.:0:.,.	0/0:14:14,0	./.:0:.,.	./.:0:.,.	0/0:13:13,0	0/0:10:10,0
MockRefGenome	67179	.	C	A	.	PASS	AC=5;AF=0.025;DP=1116;AV=19.89;NS=47	GT:DP:AD	0/0:24:24,0	0/1:88:69,19	./.:0:.,.	0/0:55:55,0	./.:0:.,.	./.:0:.,.	./.:0:.,.	0/0:10:10,0	./.:0:.,.	0/0:16:16,0	0/1:23:13,10	0/0:25:25,0	0/0:17:17,0	0/0:20:20,0	./.:0:.,.	0/0:27:27,0	0/1:31:19,12	0/0:22:22,0	./.:0:.,.	./.:0:.,.	./.:0:.,.	./.:0:.,.	0/0:13:13,0	./.:0:.,.	./.:0:.,.	0/0:16:16,0	./.:0:.,.	0/0:26:26,0	0/0:17:17,0	./.:0:.,.	./.:0:.,.	./.:0:.,.	./.:0:.,.	./.:0:.,.	./.:0:.,.	./.:0:.,.	0/0:15:15,0	./.:0:.,.	./.:0:.,.	0/0:15:15,0	0/0:10:10,0
MockRefGenome	67879	.	A	G	.	PASS	AC=55;AF=0.275;DP=4819;AV=51.44;NS=79	GT:DP:AD	0/0:39:39,0	./.:0:.,.	1/1:35:0,35	./.:0:.,.	0/0:86:86,0	1/1:42:0,42	1/1:98:0,98	0/0:19:19,0	1/1:61:0,61	0/0:57:57,0	0/0:53:53,0	1/1:183:0,183	0/0:123:122,1	0/0:111:111,0	1/1:97:0,97	0/0:51:51,0	0/0:47:47,0	0/0:77:77,0	1/1:31:0,31	1/1:20:0,20	1/1:61:0,61	1/1:41:0,41	1/1:33:0,33	1/1:64:0,64	1/1:86:1,85	1/1:79:0,79	1/1:60:0,60	1/1:106:0,106	0/0:93:92,1	0/0:58:58,0	1/1:78:0,78	0/0:117:117,0	0/1:64:57,7	0/0:31:31,0	0/0:97:97,0	0/0:109:109,0	0/0:128:128,0	0/0:26:25,1	0/0:26:26,0	./.:0:.,.	0/1:30:13,17
MockRefGenome	67880	.	T	C	.	PASS	AC=35;AF=0.175;DP=4815;AV=58.38;NS=77	GT:DP:AD	1/1:39:0,39	0/0:573:573,0	0/0:35:35,0	./.:0:.,.	0/0:86:86,0	0/0:42:42,0	0/0:98:98,0	0/0:19:19,0	0/0:61:61,0	0/0:57:57,0	0/0:53:53,0	0/0:183:183,0	0/0:123:123,0	0/0:111:111,0	0/0:97:97,0	0/0:51:51,0	0/0:47:47,0	0/0:77:77,0	0/0:31:31,0	0/0:20:20,0	0/0:61:61,0	0/0:41:41,0	0/0:33:33,0	0/0:64:64,0	0/0:86:86,0	0/0:79:79,0	0/0:60:60,0	0/0:106:106,0	0/0:93:93,0	0/0:58:58,0	0/0:78:78,0	0/0:117:117,0	0/0:64:64,0	0/0:31:31,0	0/0:97:97,0	0/0:109:109,0	0/0:128:128,0	1/1:26:1,25	1/1:26:0,26	./.:0:.,.	0/1:30:17,13
MockRefGenome	67907	.	T	C	.	PASS	AC=35;AF=0.175;DP=4754;AV=58.16;NS=76	GT:DP:AD	1/1:39:0,39	0/0:532:532,0	0/0:35:35,0	./.:0:.,.	0/0:86:86,0	0/0:42:42,0	0/0:98:97,1	0/0:19:19,0	0/0:61:61,0	0/0:57:56,1	0/0:53:53,0	0/0:183:183,0	0/0:123:123,0	0/0:111:111,0	0/0:97:97,0	0/0:46:46,0	0/0:47:47,0	0/0:77:77,0	0/0:31:31,0	0/0:20:20,0	0/0:61:61,0	0/0:41:41,0	0/0:33:33,0	0/0:64:64,0	0/0:86:86,0	0/0:79:79,0	0/0:60:60,0	0/0:106:106,0	0/0:93:93,0	0/0:58:58,0	0/0:78:78,0	0/0:117:117,0	0/1:64:51,13	0/1:31:24,7	0/0:97:97,0	0/0:109:109,0	0/0:109:109,0	1/1:26:1,25	1/1:26:0,26	./.:0:.,.	0/1:30:17,13
MockRefGenome	68227	.	G	T	.	PASS	AC=41;AF=0.205;DP=1224;AV=20.17;NS=53	GT:DP:AD	0/0:15:15,0	./.:0:.,.	1/1:18:0,18	0/0:49:49,0	0/1:33:20,13	1/1:23:0,23	./.:0:.,.	./.:0:.,.	1/1:46:0,46	./.:0:.,.	./.:0:.,.	./.:0:.,.	./.:0:.,.	./.:0:.,.	./.:0:.,.	./.:0:.,.	./.:0:.,.	./.:0:.,.	1/1:11:0,11	1/1:24:0,24	1/1:24:0,24	1/1:15:0,15	1/1:13:0,13	0/1:31:18,13	./.:0:.,.	./.:0:.,.	1/1:27:0,27	1/1:43:0,43	0/1:36:21,15	0/1:29:15,14	1/1:19:0,19	0/0:28:28,0	0/0:24:24,0	0/1:37:29,8	0/1:23:19,4	0/0:16:16,0	./.:0:.,.	0/1:11:4,7	0/1:12:9,3	0/1:24:16,8	./.:0:.,.
MockRefGenome	68230	.	T	C	.	PASS	AC=37;AF=0.185;DP=1224;AV=19.98;NS=54	GT:DP:AD	0/0:15:15,0	./.:0:.,.	1/1:18:0,18	0/0:49:49,0	0/1:33:20,13	1/1:23:0,23	./.:0:.,.	./.:0:.,.	1/1:46:0,46	./.:0:.,.	./.:0:.,.	./.:0:.,.	./.:0:.,.	./.:0:.,.	./.:0:.,.	./.:0:.,.	./.:0:.,.	./.:0:.,.	1/1:11:0,11	1/1:24:0,24	1/1:24:0,24	1/1:15:0,15	1/1:13:0,13	0/0:31:31,0	./.:0:.,.	./.:0:.,.	1/1:27:0,27	1/1:43:0,43	0/1:36:21,15	0/1:29:15,14	0/0:19:19,0	0/0:28:28,0	0/0:24:24,0	0/1:37:29,8	0/1:23:19,4	0/0:16:16,0	./.:0:.,.	0/1:11:4,7	0/1:12:9,3	0/1:24:16,8	./.:0:.,.
MockRefGenome	68234	.	G	C	.	PASS	AC=37;AF=0.185;DP=1222;AV=19.94;NS=54	GT:DP:AD	0/0:15:15,0	./.:0:.,.	1/1:18:0,18	0/0:48:48,0	0/1:33:20,13	1/1:23:0,23	./.:0:.,.	./.:0:.,.	1/1:46:0,46	./.:0:.,.	./.:0:.,.	./.:0:.,.	./.:0:.,.	./.:0:.,.	./.:0:.,.	./.:0:.,.	./.:0:.,.	./.:0:.,.	1/1:11:0,11	1/1:24:0,24	1/1:24:0,24	1/1:15:0,15	1/1:13:0,13	0/0:31:31,0	./.:0:.,.	./.:0:.,.	1/1:27:0,27	1/1:43:0,43	0/1:36:21,15	0/1:29:15,14	0/0:19:19,0	0/0:28:28,0	0/0:24:24,0	0/1:37:29,8	0/1:23:19,4	0/0:16:16,0	./.:0:.,.	0/1:11:4,7	0/1:12:9,3	0/1:24:16,8	./.:0:.,.
MockRefGenome	68397	.	A	G	.	PASS	AC=39;AF=0.195;DP=1250;AV=20.56;NS=52	GT:DP:AD	0/0:15:15,0	./.:0:.,.	1/1:18:0,18	0/0:48:48,0	0/1:33:20,13	1/1:23:0,23	./.:0:.,.	./.:0:.,.	1/1:46:0,46	./.:0:.,.	./.:0:.,.	./.:0:.,.	./.:0:.,.	./.:0:.,.	./.:0:.,.	./.:0:.,.	./.:0:.,.	./.:0:.,.	1/1:21:0,21	1/1:25:0,25	1/1:24:0,24	1/1:16:0,16	1/1:13:0,13	0/0:26:26,0	./.:0:.,.	./.:0:.,.	1/1:27:0,27	1/1:44:0,44	0/1:37:21,16	0/1:30:15,15	0/1:28:19,9	0/0:27:27,0	0/0:22:22,0	0/1:36:28,8	0/1:24:19,5	0/0:14:14,0	./.:0:.,.	0/1:12:4,8	0/1:12:8,4	0/1:25:16,9	./.:0:.,.
MockRefGenome	68466	.	C	T	.	PASS	AC=93;AF=0.465;DP=1262;AV=20.77;NS=52	GT:DP:AD	1/1:15:15,0	./.:0:.,.	1/1:18:18,0	1/1:48:48,0	1/1:33:33,0	1/1:23:23,0	./.:0:.,.	./.:0:.,.	1/1:46:46,0	./.:0:.,.	./.:0:.,.	./.:0:.,.	./.:0:.,.	./.:0:.,.	./.:0:.,.	./.:0:.,.	./.:0:.,.	./.:0:.,.	1/1:21:21,0	1/1:25:25,0	1/1:24:24,0	1/1:16:16,0	1/1:13:13,0	1/0:30:17,13	./.:0:.,.	./.:0:.,.	1/1:27:27,0	1/1:44:44,0	1/1:37:37,0	1/1:30:30,0	1/0:28:9,19	1/1:27:27,0	0/0:23:0,23	1/0:37:8,29	1/1:24:24,0	1/1:14:14,0	./.:0:.,.	1/1:12:12,0	1/1:12:12,0	1/1:25:25,0	./.:0:.,.
MockRefGenome	68484	.	T	C	.	PASS	AC=36;AF=0.180;DP=1289;AV=20.50;NS=54	GT:DP:AD	0/0:15:15,0	./.:0:.,.	1/1:18:0,18	0/0:49:49,0	0/1:33:20,13	0/1:23:8,15	./.:0:.,.	./.:0:.,.	1/1:46:0,46	./.:0:.,.	./.:0:.,.	./.:0:.,.	./.:0:.,.	./.:0:.,.	./.:0:.,.	./.:0:.,.	./.:0:.,.	./.:0:.,.	1/1:21:0,21	1/1:26:0,26	./.:0:.,.	1/1:16:0,16	1/1:13:0,13	0/0:31:31,0	./.:0:.,.	./.:0:.,.	1/1:28:0,28	1/1:44:0,44	0/1:37:21,16	0/1:30:15,15	0/1:29:19,10	0/0:28:28,0	0/0:24:24,0	0/1:39:31,8	0/1:24:19,5	0/0:16:16,0	./.:0:.,.	0/1:12:4,8	0/1:13:9,4	0/1:25:16,9	./.:0:.,.
MockRefGenome	72532	.	C	T	.	PASS	AC=12;AF=0.060;DP=1968;AV=23.58;NS=77	GT:DP:AD	0/0:25:25,0	0/0:105:105,0	0/0:39:39,0	0/0:78:78,0	0/1:26:12,14	0/0:24:24,0	0/0:25:25,0	0/0:24:24,0	0/0:57:57,0	0/0:26:26,0	0/0:31:30,1	0/0:17:17,0	0/0:25:25,0	0/0:23:23,0	0/0:35:35,0	0/0:14:14,0	0/0:38:38,0	0/0:31:31,0	0/0:22:22,0	0/0:22:22,0	0/0:24:24,0	0/0:16:16,0	0/0:32:32,0	0/0:15:15,0	0/0:26:26,0	0/0:23:23,0	0/0:25:25,0	0/0:57:57,0	1/1:26:0,26	1/1:23:0,23	0/0:28:28,0	0/1:18:8,10	./.:0:.,.	./.:0:.,.	1/1:20:0,20	1/1:28:0,28	0/0:32:32,0	0/0:15:15,0	0/0:18:18,0	0/0:36:36,0	0/0:12:12,0
MockRefGenome	72550	.	C	T	.	PASS	AC=12;AF=0.060;DP=1959;AV=23.48;NS=77	GT:DP:AD	0/0:25:25,0	0/0:105:105,0	0/0:39:39,0	0/0:78:78,0	0/1:26:12,14	0/0:23:23,0	0/0:25:25,0	0/0:24:24,0	0/0:57:57,0	0/0:26:26,0	0/0:31:31,0	0/0:17:17,0	0/0:25:25,0	0/0:23:23,0	0/0:35:35,0	0/0:14:14,0	0/0:38:38,0	0/0:31:31,0	0/0:22:22,0	0/0:21:21,0	0/0:24:24,0	0/0:16:16,0	0/0:32:32,0	0/0:15:15,0	0/0:26:26,0	0/0:23:23,0	0/0:25:25,0	0/0:57:57,0	1/1:26:0,26	1/1:23:0,23	0/0:28:28,0	0/1:18:8,10	./.:0:.,.	./.:0:.,.	1/1:20:0,20	1/1:27:0,27	0/0:32:32,0	0/0:15:15,0	0/0:18:18,0	0/0:36:35,1	0/0:12:12,0
MockRefGenome	72561	.	A	G	.	PASS	AC=70;AF=0.350;DP=1946;AV=23.41;NS=76	GT:DP:AD	0/0:25:25,0	0/0:104:104,0	1/1:38:0,38	0/0:78:77,1	1/1:26:0,26	1/1:23:0,23	1/1:25:0,25	0/0:23:23,0	1/1:57:0,57	0/0:24:24,0	0/0:31:31,0	1/1:17:0,17	0/0:25:25,0	0/0:23:23,0	1/1:34:0,34	0/0:14:14,0	0/0:38:38,0	0/0:31:31,0	1/1:21:0,21	1/1:21:0,21	1/1:24:0,24	1/1:16:0,16	1/1:32:0,32	1/1:15:0,15	1/1:26:0,26	1/1:23:0,23	1/1:25:0,25	1/1:57:0,57	1/1:26:0,26	1/1:23:0,23	1/1:28:0,28	1/1:18:0,18	./.:0:.,.	./.:0:.,.	1/1:20:0,20	1/1:27:0,27	0/0:32:32,0	0/1:15:8,7	0/1:18:9,9	0/1:35:14,21	./.:0:.,.
MockRefGenome	72644	.	G	A	.	PASS	AC=29;AF=0.145;DP=1415;AV=23.36;NS=55	GT:DP:AD	0/0:23:23,0	0/0:94:94,0	0/1:37:26,11	0/0:73:73,0	1/1:26:0,26	./.:0:.,.	0/1:23:16,7	./.:0:.,.	0/1:53:23,30	./.:0:.,.	./.:0:.,.	0/0:15:15,0	./.:0:.,.	./.:0:.,.	0/1:32:18,14	./.:0:.,.	0/1:34:27,7	0/0:27:27,0	./.:0:.,.	./.:0:.,.	./.:0:.,.	./.:0:.,.	0/0:31:31,0	0/0:12:12,0	0/1:24:9,15	0/1:21:14,7	./.:0:.,.	0/0:55:55,0	1/1:24:0,24	1/1:23:0,23	0/1:26:12,14	1/1:15:0,15	./.:0:.,.	./.:0:.,.	1/1:18:0,18	1/1:26:0,26	./.:0:.,.	0/0:15:15,0	0/0:18:18,0	0/0:34:34,0	./.:0:.,.
MockRefGenome	72756	.	C	A	.	PASS	AC=72;AF=0.360;DP=1901;AV=23.11;NS=74	GT:DP:AD	0/0:25:25,0	0/0:101:101,0	1/1:38:0,38	0/0:72:71,1	1/1:26:0,26	1/1:23:0,23	1/1:24:0,24	0/0:23:23,0	1/1:55:0,55	0/0:24:24,0	0/0:30:30,0	1/1:17:0,17	0/0:24:24,0	0/0:23:23,0	1/1:35:0,35	0/0:13:13,0	0/1:37:29,8	0/0:31:31,0	1/1:22:0,22	1/1:20:0,20	1/1:24:0,24	1/1:15:0,15	1/1:31:0,31	1/1:15:0,15	1/1:25:0,25	1/1:23:0,23	1/1:23:0,23	1/1:54:0,54	1/1:27:0,27	1/1:23:0,23	1/1:28:0,28	1/1:18:0,18	./.:0:.,.	./.:0:.,.	1/1:20:0,20	1/1:26:0,26	0/0:32:32,0	0/1:15:8,7	0/1:18:9,9	0/1:33:14,19	./.:0:.,.
MockRefGenome	73178	.	A	G	.	PASS	AC=22;AF=0.110;DP=1783;AV=22.57;NS=70	GT:DP:AD	0/0:33:33,0	0/0:32:32,0	1/1:25:0,25	./.:0:.,.	0/0:45:45,0	0/0:23:23,0	0/0:36:36,0	./.:0:.,.	0/0:70:70,0	0/0:18:18,0	0/0:19:19,0	0/0:37:37,0	0/0:14:14,0	0/0:21:21,0	0/0:39:39,0	0/0:18:18,0	0/0:18:18,0	0/0:20:20,0	0/0:11:11,0	0/0:30:30,0	0/0:13:13,0	0/0:19:19,0	0/0:17:17,0	./.:0:.,.	1/1:18:0,18	0/0:20:20,0	1/1:18:0,18	0/0:33:33,0	0/0:47:47,0	0/0:17:17,0	1/1:21:0,21	0/0:28:28,0	./.:0:.,.	1/1:14:0,14	0/0:24:24,0	0/0:10:10,0	0/0:21:21,0	1/1:10:0,10	0/0:23:23,0	0/0:39:39,0	0/0:19:19,0
MockRefGenome	73550	.	G	T	.	PASS	AC=10;AF=0.050;DP=1323;AV=17.44;NS=64	GT:DP:AD	./.:0:.,.	0/0:68:68,0	0/0:25:25,0	0/0:46:46,0	0/0:23:23,0	1/1:13:0,13	0/0:18:18,0	./.:0:.,.	0/1:33:17,16	./.:0:.,.	0/0:17:17,0	0/0:12:12,0	0/0:17:17,0	0/0:18:18,0	0/0:24:24,0	0/0:13:13,0	0/0:13:13,0	0/0:21:21,0	0/0:15:15,0	0/1:18:8,10	0/0:13:13,0	0/0:18:18,0	0/0:22:22,0	0/0:21:21,0	0/1:24:13,11	./.:0:.,.	0/0:26:26,0	0/0:32:32,0	./.:0:.,.	0/0:14:14,0	1/1:10:0,10	0/0:16:16,0	0/0:12:12,0	0/0:27:27,0	0/0:17:17,0	./.:0:.,.	0/0:10:10,0	0/0:11:11,0	0/0:16:16,0	0/0:14:14,0	./.:0:.,.
MockRefGenome	73724	.	C	T	.	PASS	AC=53;AF=0.265;DP=1228;AV=16.44;NS=61	GT:DP:AD	./.:0:.,.	0/0:63:63,0	1/1:23:0,23	0/0:45:45,0	1/1:20:0,20	1/1:12:0,12	1/1:15:0,15	./.:0:.,.	1/1:29:1,28	./.:0:.,.	0/0:16:16,0	1/1:12:0,12	0/0:16:16,0	0/0:18:18,0	0/1:25:12,13	0/0:13:13,0	0/0:11:11,0	0/0:19:19,0	./.:0:.,.	1/1:16:0,16	1/1:13:0,13	1/1:18:0,18	1/1:19:0,19	0/1:21:13,8	0/1:22:12,10	0/1:9:4,5	0/0:25:25,0	0/0:26:26,0	./.:0:.,.	1/1:14:0,14	1/1:16:0,16	1/1:14:0,14	./.:0:.,.	1/1:24:0,24	0/1:15:6,9	./.:0:.,.	./.:0:.,.	0/1:11:5,6	0/1:15:9,6	0/0:12:12,0	./.:0:.,.
MockRefGenome	73778	.	G	A	.	PASS	AC=61;AF=0.305;DP=1339;AV=17.45;NS=66	GT:DP:AD	./.:0:.,.	1/1:67:0,67	0/0:25:25,0	1/1:46:0,46	0/0:24:24,0	0/0:13:13,0	0/0:18:18,0	./.:0:.,.	0/0:34:34,0	./.:0:.,.	1/1:17:0,17	0/0:13:13,0	1/1:17:0,17	1/1:18:0,18	0/0:25:25,0	1/1:13:0,13	1/1:13:0,13	1/1:23:0,23	0/0:15:15,0	0/0:19:19,0	0/0:14:14,0	0/0:18:18,0	0/0:22:22,0	0/0:21:21,0	0/0:24:24,0	./.:0:.,.	0/0:27:27,0	0/0:32:32,0	./.:0:.,.	0/0:15:15,0	0/0:17:17,0	0/0:16:16,0	0/0:12:12,0	0/0:28:28,0	0/0:16:16,0	./.:0:.,.	1/1:10:0,10	0/1:11:6,5	0/1:16:8,8	0/1:14:8,6	./.:0:.,.
MockRefGenome	74261	.	G	A	.	PASS	AC=5;AF=0.025;DP=984;AV=18.26;NS=46	GT:DP:AD	0/0:22:22,0	./.:0:.,.	0/0:25:25,0	0/0:46:46,0	0/0:23:23,0	0/0:11:11,0	./.:0:.,.	./.:0:.,.	./.:0:.,.	./.:0:.,.	./.:0:.,.	./.:0:.,.	./.:0:.,.	./.:0:.,.	0/0:25:25,0	./.:0:.,.	./.:0:.,.	./.:0:.,.	./.:0:.,.	./.:0:.,.	0/0:30:30,0	0/0:15:15,0	./.:0:.,.	./.:0:.,.	./.:0:.,.	./.:0:.,.	0/0:15:15,0	0/0:53:53,0	0/0:26:26,0	0/0:26:26,0	0/0:25:25,0	0/0:11:11,0	./.:0:.,.	./.:0:.,.	0/0:15:15,0	0/0:11:11,0	./.:0:.,.	0/0:19:19,0	0/0:11:11,0	0/0:14:14,0	0/0:10:10,0
MockRefGenome	74299	.	G	T	.	PASS	AC=6;AF=0.030;DP=944;AV=18.20;NS=44	GT:DP:AD	0/0:22:22,0	./.:0:.,.	1/1:25:0,25	0/0:44:44,0	0/0:23:23,0	./.:0:.,.	./.:0:.,.	./.:0:.,.	./.:0:.,.	./.:0:.,.	./.:0:.,.	./.:0:.,.	./.:0:.,.	./.:0:.,.	0/0:25:25,0	./.:0:.,.	./.:0:.,.	./.:0:.,.	./.:0:.,.	./.:0:.,.	0/0:28:28,0	0/1:11:5,6	./.:0:.,.	./.:0:.,.	./.:0:.,.	./.:0:.,.	0/0:11:11,0	0/1:50:25,25	0/0:25:25,0	0/0:23:23,0	0/0:23:23,0	0/0:11:11,0	./.:0:.,.	./.:0:.,.	0/0:15:15,0	0/0:10:10,0	./.:0:.,.	0/0:19:19,0	0/0:11:11,0	0/0:14:14,0	0/0:10:10,0
MockRefGenome	74391	.	G	T	.	PASS	AC=46;AF=0.230;DP=1060;AV=19.50;NS=46	GT:DP:AD	1/1:21:0,21	./.:0:.,.	0/0:25:25,0	1/1:45:0,45	0/0:27:27,0	0/0:12:12,0	./.:0:.,.	./.:0:.,.	./.:0:.,.	./.:0:.,.	./.:0:.,.	./.:0:.,.	./.:0:.,.	./.:0:.,.	0/0:25:25,0	./.:0:.,.	./.:0:.,.	./.:0:.,.	./.:0:.,.	./.:0:.,.	0/0:31:31,0	0/0:17:17,0	./.:0:.,.	./.:0:.,.	./.:0:.,.	./.:0:.,.	0/0:15:15,0	0/0:54:54,0	0/0:27:27,0	0/0:27:27,0	0/0:27:27,0	0/0:13:13,0	./.:0:.,.	./.:0:.,.	0/0:19:19,0	0/0:12:12,0	./.:0:.,.	0/1:19:11,8	./.:0:.,.	./.:0:.,.	1/1:11:0,11
MockRefGenome	74393	.	G	T	.	PASS	AC=52;AF=0.260;DP=1060;AV=19.73;NS=44	GT:DP:AD	1/1:21:21,0	./.:0:.,.	1/1:25:25,0	1/1:45:45,0	0/0:27:0,27	./.:0:.,.	./.:0:.,.	./.:0:.,.	./.:0:.,.	./.:0:.,.	./.:0:.,.	./.:0:.,.	./.:0:.,.	./.:0:.,.	0/0:25:0,25	./.:0:.,.	./.:0:.,.	./.:0:.,.	./.:0:.,.	./.:0:.,.	0/0:31:0,31	1/0:17:3,14	./.:0:.,.	./.:0:.,.	./.:0:.,.	./.:0:.,.	./.:0:.,.	0/0:54:0,54	0/0:27:0,27	0/0:27:0,27	0/0:27:0,27	0/0:13:0,13	./.:0:.,.	./.:0:.,.	0/0:19:0,19	0/0:12:0,12	./.:0:.,.	1/0:19:8,11	1/1:12:12,0	./.:0:.,.	1/1:11:11,0
MockRefGenome	74468	.	C	G	.	PASS	AC=5;AF=0.025;DP=1067;AV=19.14;NS=49	GT:DP:AD	0/0:21:21,0	./.:0:.,.	0/0:25:25,0	0/0:46:46,0	0/0:27:27,0	0/0:12:12,0	./.:0:.,.	./.:0:.,.	./.:0:.,.	./.:0:.,.	./.:0:.,.	./.:0:.,.	./.:0:.,.	./.:0:.,.	0/0:25:25,0	./.:0:.,.	./.:0:.,.	./.:0:.,.	./.:0:.,.	./.:0:.,.	0/0:32:32,0	0/1:17:10,7	./.:0:.,.	./.:0:.,.	./.:0:.,.	./.:0:.,.	0/0:15:15,0	0/1:56:28,28	0/0:28:28,0	0/0:27:27,0	0/0:28:28,0	0/0:13:13,0	./.:0:.,.	./.:0:.,.	0/0:19:19,0	0/0:12:12,0	./.:0:.,.	0/0:19:19,0	0/0:12:12,0	0/0:17:17,0	0/0:11:11,0
MockRefGenome	74469	.	G	T	.	PASS	AC=9;AF=0.045;DP=1068;AV=19.82;NS=45	GT:DP:AD	0/0:21:21,0	./.:0:.,.	1/1:25:0,25	0/0:46:46,0	0/0:27:27,0	1/1:12:0,12	./.:0:.,.	./.:0:.,.	./.:0:.,.	./.:0:.,.	./.:0:.,.	./.:0:.,.	./.:0:.,.	./.:0:.,.	0/0:25:25,0	./.:0:.,.	./.:0:.,.	./.:0:.,.	./.:0:.,.	./.:0:.,.	0/0:32:32,0	0/1:17:14,3	./.:0:.,.	./.:0:.,.	./.:0:.,.	./.:0:.,.	./.:0:.,.	0/0:56:56,0	0/0:28:28,0	0/0:27:27,0	1/1:28:0,28	0/0:13:13,0	./.:0:.,.	./.:0:.,.	0/0:19:19,0	0/0:12:12,0	./.:0:.,.	0/0:19:19,0	./.:0:.,.	0/0:17:17,0	0/0:11:11,0
MockRefGenome	74470	.	C	G	.	PASS	AC=46;AF=0.230;DP=1067;AV=19.65;NS=46	GT:DP:AD	1/1:21:0,21	./.:0:.,.	0/0:25:25,0	1/1:46:0,46	0/0:27:27,0	0/0:12:12,0	./.:0:.,.	./.:0:.,.	./.:0:.,.	./.:0:.,.	./.:0:.,.	./.:0:.,.	./.:0:.,.	./.:0:.,.	0/0:25:25,0	./.:0:.,.	./.:0:.,.	./.:0:.,.	./.:0:.,.	./.:0:.,.	0/0:32:32,0	0/0:17:17,0	./.:0:.,.	./.:0:.,.	./.:0:.,.	./.:0:.,.	0/0:15:15,0	0/0:56:56,0	0/0:28:28,0	0/0:27:27,0	0/0:28:28,0	0/0:13:13,0	./.:0:.,.	./.:0:.,.	0/0:19:19,0	0/0:12:12,0	./.:0:.,.	0/1:19:11,8	./.:0:.,.	./.:0:.,.	1/1:11:0,11
MockRefGenome	75602	.	T	G	.	PASS	AC=46;AF=0.230;DP=1077;AV=16.50;NS=48	GT:DP:AD	./.:0:.,.	1/1:13:0,13	./.:0:.,.	1/1:33:0,33	0/0:17:17,0	0/0:16:16,0	1/1:15:0,15	1/1:18:0,18	0/0:44:44,0	./.:0:.,.	1/1:11:0,11	0/0:17:17,0	1/1:12:0,12	1/1:22:0,22	0/0:15:15,0	./.:0:.,.	1/1:11:0,11	1/1:20:0,20	0/0:11:11,0	0/0:10:10,0	0/0:11:11,0	0/0:17:17,0	./.:0:.,.	./.:0:.,.	0/0:10:10,0	0/0:10:10,0	./.:0:.,.	0/0:23:23,0	0/0:12:12,0	0/0:17:17,0	0/0:12:12,0	./.:0:.,.	./.:0:.,.	./.:0:.,.	./.:0:.,.	./.:0:.,.	1/1:12:0,12	./.:0:.,.	./.:0:.,.	0/0:18:18,0	0/0:14:14,0
MockRefGenome	76820	.	G	C	.	PASS	AC=48;AF=0.240;DP=1014;AV=19.40;NS=43	GT:DP:AD	1/1:23:23,0	./.:0:.,.	0/0:32:0,32	1/1:56:56,0	0/0:17:0,17	0/0:11:0,11	./.:0:.,.	./.:0:.,.	./.:0:.,.	./.:0:.,.	./.:0:.,.	./.:0:.,.	./.:0:.,.	./.:0:.,.	./.:0:.,.	./.:0:.,.	./.:0:.,.	./.:0:.,.	./.:0:.,.	./.:0:.,.	0/0:18:0,18	0/0:10:0,10	./.:0:.,.	./.:0:.,.	./.:0:.,.	./.:0:.,.	0/0:15:0,15	0/0:36:0,36	0/0:27:0,27	0/0:32:0,32	0/0:29:0,29	0/0:16:0,16	1/1:22:22,0	1/1:34:34,0	0/0:10:0,10	0/0:16:0,16	./.:0:.,.	1/0:14:9,5	./.:0:.,.	1/1:18:18,0	./.:0:.,.
MockRefGenome	76821	.	C	A	.	PASS	AC=8;AF=0.040;DP=1021;AV=19.34;NS=44	GT:DP:AD	0/0:24:24,0	./.:0:.,.	1/1:32:0,32	0/0:56:56,0	0/0:17:17,0	1/1:11:0,11	./.:0:.,.	./.:0:.,.	./.:0:.,.	./.:0:.,.	./.:0:.,.	./.:0:.,.	./.:0:.,.	./.:0:.,.	./.:0:.,.	./.:0:.,.	./.:0:.,.	./.:0:.,.	./.:0:.,.	./.:0:.,.	0/0:18:18,0	0/0:10:10,0	./.:0:.,.	./.:0:.,.	./.:0:.,.	./.:0:.,.	0/0:15:15,0	0/0:36:36,0	0/0:27:27,0	0/0:32:32,0	1/1:29:0,29	0/0:16:16,0	0/0:22:22,0	0/0:34:34,0	0/0:10:10,0	0/0:16:16,0	./.:0:.,.	0/0:14:14,0	0/0:12:12,0	0/0:18:18,0	./.:0:.,.
MockRefGenome	76887	.	C	A	.	PASS	AC=7;AF=0.035;DP=1024;AV=19.41;NS=44	GT:DP:AD	0/0:24:24,0	./.:0:.,.	0/0:32:32,0	0/0:56:56,0	0/0:17:17,0	0/0:12:12,0	./.:0:.,.	./.:0:.,.	./.:0:.,.	./.:0:.,.	./.:0:.,.	./.:0:.,.	./.:0:.,.	./.:0:.,.	./.:0:.,.	./.:0:.,.	./.:0:.,.	./.:0:.,.	./.:0:.,.	./.:0:.,.	0/0:18:18,0	0/0:10:10,0	./.:0:.,.	./.:0:.,.	./.:0:.,.	./.:0:.,.	0/0:15:15,0	0/0:36:36,0	0/0:27:27,0	0/0:32:32,0	0/0:29:29,0	0/0:15:15,0	1/1:22:0,22	1/1:34:0,34	0/0:10:10,0	0/0:16:16,0	./.:0:.,.	0/0:14:14,0	0/0:12:12,0	0/0:19:19,0	./.:0:.,.
MockRefGenome	76897	.	A	C	.	PASS	AC=33;AF=0.165;DP=1022;AV=19.71;NS=42	GT:DP:AD	0/0:24:24,0	./.:0:.,.	0/0:32:32,0	0/0:56:56,0	1/1:16:0,16	./.:0:.,.	./.:0:.,.	./.:0:.,.	./.:0:.,.	./.:0:.,.	./.:0:.,.	./.:0:.,.	./.:0:.,.	./.:0:.,.	./.:0:.,.	./.:0:.,.	./.:0:.,.	./.:0:.,.	./.:0:.,.	./.:0:.,.	1/1:18:0,18	1/1:10:0,10	./.:0:.,.	./.:0:.,.	./.:0:.,.	./.:0:.,.	1/1:15:0,15	1/1:36:0,36	1/1:27:0,27	1/1:32:0,32	1/1:29:0,29	1/1:14:0,14	0/0:22:22,0	0/0:34:34,0	1/1:10:0,10	1/1:16:0,16	./.:0:.,.	0/1:14:9,5	./.:0:.,.	0/0:19:19,0	./.:0:.,.
MockRefGenome	76899	.	C	A	.	PASS	AC=42;AF=0.210;DP=1022;AV=19.53;NS=43	GT:DP:AD	1/1:24:24,0	./.:0:.,.	0/0:32:0,32	1/1:56:56,0	0/0:16:0,16	0/0:12:0,12	./.:0:.,.	./.:0:.,.	./.:0:.,.	./.:0:.,.	./.:0:.,.	./.:0:.,.	./.:0:.,.	./.:0:.,.	./.:0:.,.	./.:0:.,.	./.:0:.,.	./.:0:.,.	./.:0:.,.	./.:0:.,.	0/0:18:0,18	0/0:10:0,10	./.:0:.,.	./.:0:.,.	./.:0:.,.	./.:0:.,.	0/0:15:0,15	0/0:36:0,36	0/0:27:0,27	0/0:32:0,32	0/0:29:0,29	0/0:14:0,14	0/0:22:0,22	0/0:34:0,34	0/0:10:0,10	0/0:16:0,16	./.:0:.,.	1/0:14:9,5	./.:0:.,.	1/1:19:19,0	./.:0:.,.
MockRefGenome	76991	.	C	A	.	PASS	AC=9;AF=0.045;DP=997;AV=19.09;NS=43	GT:DP:AD	0/0:20:20,0	./.:0:.,.	1/1:27:0,27	0/0:61:61,0	0/0:17:17,0	1/1:11:0,11	./.:0:.,.	./.:0:.,.	./.:0:.,.	./.:0:.,.	./.:0:.,.	./.:0:.,.	./.:0:.,.	./.:0:.,.	./.:0:.,.	./.:0:.,.	./.:0:.,.	./.:0:.,.	./.:0:.,.	./.:0:.,.	0/0:18:18,0	0/1:10:4,6	./.:0:.,.	./.:0:.,.	./.:0:.,.	./.:0:.,.	0/0:15:15,0	0/1:35:17,18	0/0:27:27,0	0/0:32:32,0	0/0:29:29,0	0/0:16:16,0	0/0:19:19,0	0/0:16:16,0	0/0:10:10,0	0/0:16:16,0	./.:0:.,.	0/0:14:14,0	0/0:12:12,0	0/0:18:18,0	./.:0:.,.
MockRefGenome	77067	.	G	T	.	PASS	AC=6;AF=0.030;DP=1040;AV=19.53;NS=45	GT:DP:AD	0/0:26:26,0	./.:0:.,.	0/0:31:31,0	0/0:65:65,0	0/0:17:17,0	0/0:11:11,0	./.:0:.,.	./.:0:.,.	./.:0:.,.	./.:0:.,.	./.:0:.,.	./.:0:.,.	./.:0:.,.	./.:0:.,.	./.:0:.,.	./.:0:.,.	./.:0:.,.	./.:0:.,.	./.:0:.,.	./.:0:.,.	0/0:18:18,0	0/0:10:10,0	./.:0:.,.	./.:0:.,.	./.:0:.,.	./.:0:.,.	0/0:15:15,0	0/0:36:36,0	0/0:27:27,0	0/0:32:32,0	0/0:29:29,0	0/0:16:16,0	1/1:21:0,21	1/1:18:0,18	0/0:10:10,0	0/0:16:16,0	./.:0:.,.	0/0:15:15,0	0/0:12:12,0	0/0:19:19,0	./.:0:.,.
MockRefGenome	77068	.	C	T	.	PASS	AC=6;AF=0.030;DP=1038;AV=19.75;NS=44	GT:DP:AD	0/0:26:26,0	./.:0:.,.	0/0:31:31,0	0/0:65:65,0	0/0:17:17,0	0/0:11:11,0	./.:0:.,.	./.:0:.,.	./.:0:.,.	./.:0:.,.	./.:0:.,.	./.:0:.,.	./.:0:.,.	./.:0:.,.	./.:0:.,.	./.:0:.,.	./.:0:.,.	./.:0:.,.	./.:0:.,.	./.:0:.,.	0/0:18:18,0	0/0:10:10,0	./.:0:.,.	./.:0:.,.	./.:0:.,.	./.:0:.,.	0/0:15:15,0	0/0:36:36,0	0/0:27:27,0	0/0:32:32,0	0/0:29:29,0	0/0:16:16,0	1/1:21:0,21	1/1:18:0,18	0/0:10:10,0	0/0:16:16,0	./.:0:.,.	0/0:15:15,0	0/0:12:12,0	0/0:19:19,0	./.:0:.,.
MockRefGenome	77072	.	T	G	.	PASS	AC=6;AF=0.030;DP=1042;AV=19.80;NS=44	GT:DP:AD	0/0:25:25,0	./.:0:.,.	0/0:31:31,0	0/0:65:65,0	0/0:17:17,0	0/0:11:11,0	./.:0:.,.	./.:0:.,.	./.:0:.,.	./.:0:.,.	./.:0:.,.	./.:0:.,.	./.:0:.,.	./.:0:.,.	./.:0:.,.	./.:0:.,.	./.:0:.,.	./.:0:.,.	./.:0:.,.	./.:0:.,.	0/0:18:18,0	0/0:10:10,0	./.:0:.,.	./.:0:.,.	./.:0:.,.	./.:0:.,.	0/0:15:15,0	0/0:36:36,0	0/0:27:27,0	0/0:32:32,0	0/0:29:29,0	0/0:16:16,0	1/1:21:0,21	1/1:19:0,19	0/0:10:10,0	0/0:16:16,0	./.:0:.,.	0/0:15:15,0	0/0:12:12,0	0/0:19:19,0	./.:0:.,.
MockRefGenome	77173	.	A	G	.	PASS	AC=34;AF=0.170;DP=1185;AV=19.43;NS=53	GT:DP:AD	0/0:20:20,0	./.:0:.,.	1/1:30:0,30	0/0:52:52,0	0/1:28:11,17	0/1:14:5,9	./.:0:.,.	./.:0:.,.	1/1:64:0,64	./.:0:.,.	./.:0:.,.	./.:0:.,.	./.:0:.,.	./.:0:.,.	./.:0:.,.	./.:0:.,.	./.:0:.,.	./.:0:.,.	./.:0:.,.	1/1:16:0,16	./.:0:.,.	./.:0:.,.	1/1:14:0,14	0/0:18:18,0	1/1:12:0,12	./.:0:.,.	1/1:17:0,17	1/1:32:0,32	0/1:33:19,14	0/1:21:10,11	0/1:26:11,15	0/0:20:20,0	./.:0:.,.	0/1:24:11,13	0/1:18:11,7	0/0:17:17,0	./.:0:.,.	0/1:17:8,9	0/1:15:10,5	0/1:26:14,12	0/0:21:21,0
MockRefGenome	77191	.	A	G	.	PASS	AC=8;AF=0.040;DP=1178;AV=19.04;NS=55	GT:DP:AD	0/0:20:20,0	./.:0:.,.	0/0:30:30,0	0/0:52:52,0	0/0:28:28,0	0/0:14:14,0	./.:0:.,.	./.:0:.,.	0/0:64:64,0	./.:0:.,.	./.:0:.,.	./.:0:.,.	./.:0:.,.	./.:0:.,.	./.:0:.,.	./.:0:.,.	./.:0:.,.	./.:0:.,.	0/0:11:11,0	0/0:16:16,0	./.:0:.,.	./.:0:.,.	0/0:14:14,0	0/1:18:8,10	0/0:12:12,0	./.:0:.,.	0/0:17:17,0	0/0:32:32,0	0/0:32:32,0	0/0:21:21,0	0/1:24:14,10	0/0:20:20,0	./.:0:.,.	0/1:24:13,11	0/0:18:18,0	0/0:17:17,0	./.:0:.,.	0/0:17:17,0	0/0:15:15,0	0/0:26:26,0	0/0:21:21,0
MockRefGenome	77260	.	T	C	.	PASS	AC=37;AF=0.185;DP=1097;AV=18.67;NS=49	GT:DP:AD	0/0:19:19,0	./.:0:.,.	1/1:30:0,30	0/0:52:52,0	0/1:26:10,16	1/1:14:0,14	./.:0:.,.	./.:0:.,.	1/1:62:0,62	./.:0:.,.	./.:0:.,.	./.:0:.,.	./.:0:.,.	./.:0:.,.	./.:0:.,.	./.:0:.,.	./.:0:.,.	./.:0:.,.	./.:0:.,.	1/1:16:0,16	./.:0:.,.	./.:0:.,.	1/1:14:0,14	0/0:18:18,0	1/1:10:0,10	./.:0:.,.	1/1:15:0,15	1/1:30:0,30	0/1:28:14,14	0/1:19:8,11	0/1:24:10,14	0/0:20:20,0	./.:0:.,.	0/1:22:11,11	0/1:16:11,5	0/0:14:14,0	./.:0:.,.	0/1:16:7,9	0/1:12:8,4	0/1:24:13,11	0/0:20:20,0
MockRefGenome	77422	.	C	G	.	PASS	AC=32;AF=0.160;DP=1130;AV=18.66;NS=53	GT:DP:AD	0/0:20:20,0	./.:0:.,.	1/1:28:0,28	0/0:52:52,0	0/1:26:11,15	1/1:13:0,13	./.:0:.,.	./.:0:.,.	1/1:61:0,61	./.:0:.,.	./.:0:.,.	./.:0:.,.	./.:0:.,.	./.:0:.,.	./.:0:.,.	./.:0:.,.	./.:0:.,.	./.:0:.,.	./.:0:.,.	1/1:15:0,15	./.:0:.,.	./.:0:.,.	1/1:13:0,13	0/0:18:18,0	./.:0:.,.	./.:0:.,.	1/1:18:0,18	1/1:30:0,30	0/1:32:19,13	0/1:20:10,10	0/0:11:11,0	0/0:20:20,0	0/0:14:14,0	0/1:24:11,13	0/1:18:11,7	0/0:17:17,0	./.:0:.,.	0/1:17:8,9	0/1:15:10,5	0/1:26:14,12	0/0:21:21,0
MockRefGenome	77426	.	A	G	.	PASS	AC=32;AF=0.160;DP=1132;AV=18.68;NS=53	GT:DP:AD	0/0:20:20,0	./.:0:.,.	1/1:28:0,28	0/0:52:52,0	0/1:26:11,15	1/1:13:0,13	./.:0:.,.	./.:0:.,.	1/1:61:0,61	./.:0:.,.	./.:0:.,.	./.:0:.,.	./.:0:.,.	./.:0:.,.	./.:0:.,.	./.:0:.,.	./.:0:.,.	./.:0:.,.	./.:0:.,.	1/1:15:0,15	./.:0:.,.	./.:0:.,.	1/1:13:0,13	0/0:18:18,0	./.:0:.,.	./.:0:.,.	1/1:18:0,18	1/1:30:0,30	0/1:32:19,13	0/1:20:10,10	0/0:11:11,0	0/0:20:20,0	0/0:14:14,0	0/1:24:11,13	0/1:18:11,7	0/0:17:17,0	./.:0:.,.	0/1:17:8,9	0/1:15:10,5	0/1:26:14,12	0/0:21:21,0
MockRefGenome	77429	.	C	A	.	PASS	AC=36;AF=0.180;DP=1132;AV=18.75;NS=52	GT:DP:AD	0/0:20:20,0	./.:0:.,.	1/1:28:0,28	0/0:52:52,0	0/1:26:11,15	1/1:13:0,13	./.:0:.,.	./.:0:.,.	1/1:61:0,61	./.:0:.,.	./.:0:.,.	./.:0:.,.	./.:0:.,.	./.:0:.,.	./.:0:.,.	./.:0:.,.	./.:0:.,.	./.:0:.,.	./.:0:.,.	1/1:15:0,15	./.:0:.,.	./.:0:.,.	1/1:13:0,13	0/1:18:8,10	./.:0:.,.	./.:0:.,.	1/1:18:0,18	1/1:30:0,30	0/1:32:19,13	0/1:20:10,10	1/1:11:0,11	0/0:20:20,0	0/0:14:14,0	0/1:24:11,13	0/1:18:11,7	0/0:17:17,0	./.:0:.,.	0/1:17:8,9	0/1:15:10,5	0/1:26:14,12	0/0:21:21,0
MockRefGenome	77511	.	C	T	.	PASS	AC=51;AF=0.255;DP=1280;AV=17.08;NS=62	GT:DP:AD	./.:0:.,.	1/1:71:0,71	0/0:23:23,0	1/1:34:0,34	0/0:13:13,0	0/0:13:13,0	0/0:19:19,0	1/1:14:0,14	0/0:56:56,0	1/1:12:0,12	1/1:30:0,30	0/0:16:16,0	1/1:27:1,26	1/1:20:0,20	0/0:18:18,0	1/1:12:0,12	1/1:16:0,16	1/1:15:0,15	0/0:11:11,0	0/0:20:20,0	0/0:10:10,0	0/0:18:18,0	0/0:17:17,0	0/0:11:11,0	0/0:16:16,0	0/0:12:12,0	0/0:12:12,0	0/0:25:25,0	0/0:11:11,0	0/0:23:23,0	0/0:12:12,0	0/0:17:17,0	./.:0:.,.	0/0:14:14,0	0/0:16:16,0	0/0:14:14,0	1/1:21:0,21	./.:0:.,.	0/1:19:9,10	0/1:21:8,13	0/1:11:7,4
MockRefGenome	77565	.	G	A	.	PASS	AC=51;AF=0.255;DP=1233;AV=16.85;NS=59	GT:DP:AD	./.:0:.,.	0/0:70:70,0	1/1:23:0,23	0/0:34:34,0	1/1:12:0,12	1/1:13:0,13	1/1:19:0,19	0/0:12:12,0	1/1:54:1,53	0/0:12:12,0	0/0:30:30,0	1/1:15:0,15	0/0:25:24,1	0/0:20:20,0	0/1:18:9,9	0/0:12:12,0	0/0:16:16,0	0/0:14:14,0	./.:0:.,.	1/1:20:0,20	./.:0:.,.	1/1:17:0,17	1/1:15:0,15	0/1:10:7,3	0/1:15:10,5	0/1:12:9,3	0/0:12:12,0	0/0:22:22,0	1/1:11:0,11	1/1:21:0,21	1/1:11:0,11	1/1:17:0,17	./.:0:.,.	1/1:14:0,14	0/1:16:6,10	1/1:13:0,13	0/0:20:20,0	./.:0:.,.	0/1:17:8,9	0/0:20:20,0	0/0:11:11,0
MockRefGenome	78160	.	C	T	.	PASS	AC=7;AF=0.035;DP=1337;AV=21.25;NS=52	GT:DP:AD	0/0:33:33,0	./.:0:.,.	0/1:20:3,17	0/0:103:103,0	1/1:19:0,19	./.:0:.,.	0/0:12:12,0	0/0:10:10,0	0/0:19:19,0	./.:0:.,.	0/0:16:16,0	./.:0:.,.	./.:0:.,.	./.:0:.,.	1/1:40:0,40	./.:0:.,.	./.:0:.,.	./.:0:.,.	./.:0:.,.	./.:0:.,.	./.:0:.,.	./.:0:.,.	./.:0:.,.	./.:0:.,.	0/0:14:14,0	./.:0:.,.	./.:0:.,.	0/0:19:19,0	0/0:24:24,0	0/0:26:26,0	0/0:25:25,0	0/0:16:16,0	0/1:19:8,11	./.:0:.,.	0/1:15:9,6	0/0:18:18,0	./.:0:.,.	0/0:15:15,0	0/0:26:26,0	0/0:17:17,0	./.:0:.,.
MockRefGenome	78199	.	C	T	.	PASS	AC=40;AF=0.200;DP=1322;AV=19.67;NS=57	GT:DP:AD	0/1:32:22,10	./.:0:.,.	0/0:19:19,0	0/1:103:48,55	0/0:19:19,0	./.:0:.,.	0/0:12:12,0	0/0:10:10,0	./.:0:.,.	0/1:7:3,4	1/1:16:0,16	./.:0:.,.	0/1:7:4,3	./.:0:.,.	0/0:40:40,0	./.:0:.,.	./.:0:.,.	./.:0:.,.	./.:0:.,.	./.:0:.,.	./.:0:.,.	./.:0:.,.	./.:0:.,.	./.:0:.,.	0/0:14:14,0	./.:0:.,.	./.:0:.,.	0/0:17:17,0	0/0:23:23,0	0/0:25:25,0	0/0:25:25,0	0/0:16:16,0	./.:0:.,.	./.:0:.,.	0/0:15:15,0	0/0:18:18,0	./.:0:.,.	0/1:15:12,3	0/1:25:17,8	0/1:17:12,5	./.:0:.,.
MockRefGenome	78223	.	C	T	.	PASS	AC=22;AF=0.110;DP=1311;AV=21.20;NS=50	GT:DP:AD	0/0:32:32,0	./.:0:.,.	0/0:19:19,0	0/0:103:103,0	0/0:18:18,0	./.:0:.,.	1/1:12:0,12	0/0:10:10,0	./.:0:.,.	./.:0:.,.	0/0:16:16,0	./.:0:.,.	./.:0:.,.	./.:0:.,.	0/0:40:40,0	./.:0:.,.	./.:0:.,.	./.:0:.,.	./.:0:.,.	./.:0:.,.	./.:0:.,.	./.:0:.,.	./.:0:.,.	./.:0:.,.	1/1:14:0,14	./.:0:.,.	./.:0:.,.	0/0:17:17,0	1/1:23:0,23	1/1:25:0,25	0/1:25:10,15	1/1:16:0,16	0/1:19:12,7	./.:0:.,.	0/1:15:6,9	1/1:18:0,18	./.:0:.,.	0/1:15:9,6	0/1:25:17,8	0/0:17:17,0	./.:0:.,.
MockRefGenome	78271	.	C	T	.	PASS	AC=33;AF=0.165;DP=1289;AV=19.67;NS=57	GT:DP:AD	0/1:32:10,22	./.:0:.,.	0/0:19:19,0	0/1:103:55,48	0/0:15:15,0	./.:0:.,.	0/0:12:12,0	0/0:10:10,0	0/0:17:17,0	./.:0:.,.	0/0:16:16,0	./.:0:.,.	./.:0:.,.	./.:0:.,.	0/0:40:40,0	./.:0:.,.	./.:0:.,.	./.:0:.,.	./.:0:.,.	./.:0:.,.	./.:0:.,.	./.:0:.,.	./.:0:.,.	./.:0:.,.	0/0:14:14,0	./.:0:.,.	./.:0:.,.	0/0:16:16,0	0/0:22:22,0	0/0:25:25,0	0/0:25:25,0	0/0:16:16,0	0/0:19:19,0	./.:0:.,.	0/0:15:15,0	0/0:17:17,0	./.:0:.,.	0/1:15:9,6	0/1:25:16,9	0/1:17:5,12	./.:0:.,.
MockRefGenome	78280	.	C	T	.	PASS	AC=21;AF=0.105;DP=937;AV=18.32;NS=44	GT:DP:AD	0/1:32:22,10	./.:0:.,.	0/1:19:16,3	0/0:48:48,0	0/0:15:15,0	./.:0:.,.	0/0:12:12,0	./.:0:.,.	0/0:17:17,0	./.:0:.,.	./.:0:.,.	./.:0:.,.	./.:0:.,.	./.:0:.,.	0/0:40:40,0	./.:0:.,.	./.:0:.,.	./.:0:.,.	./.:0:.,.	./.:0:.,.	./.:0:.,.	./.:0:.,.	./.:0:.,.	./.:0:.,.	0/0:14:14,0	./.:0:.,.	./.:0:.,.	./.:0:.,.	0/0:22:22,0	0/0:25:25,0	0/1:25:15,10	0/0:16:16,0	0/0:18:18,0	./.:0:.,.	0/0:15:15,0	0/0:17:17,0	./.:0:.,.	0/1:15:12,3	0/1:25:17,8	0/0:12:12,0	./.:0:.,.
MockRefGenome	78323	.	T	C	.	PASS	AC=12;AF=0.060;DP=863;AV=17.61;NS=31	GT:DP:AD	0/0:10:10,0	./.:0:.,.	1/1:16:0,16	0/0:52:52,0	1/1:17:0,17	./.:0:.,.	./.:0:.,.	0/0:10:10,0	1/1:19:0,19	./.:0:.,.	0/0:12:12,0	./.:0:.,.	./.:0:.,.	./.:0:.,.	1/1:37:0,37	./.:0:.,.	./.:0:.,.	./.:0:.,.	./.:0:.,.	./.:0:.,.	./.:0:.,.	./.:0:.,.	./.:0:.,.	./.:0:.,.	0/0:14:14,0	./.:0:.,.	./.:0:.,.	1/1:17:0,17	0/0:20:20,0	0/0:25:25,0	0/1:22:12,10	0/0:14:14,0	0/0:18:18,0	./.:0:.,.	0/1:14:8,6	0/0:17:17,0	./.:0:.,.	./.:0:.,.	0/0:17:17,0	./.:0:.,.	./.:0:.,.
MockRefGenome	78544	.	C	G	.	PASS	AC=20;AF=0.100;DP=1817;AV=20.35;NS=83	GT:DP:AD	0/0:32:32,0	0/0:65:65,0	0/0:25:25,0	0/0:56:56,0	1/1:21:0,21	0/0:18:18,0	0/0:31:31,0	0/0:18:18,0	0/0:59:59,0	0/0:17:17,0	0/0:22:22,0	0/0:25:25,0	0/0:20:20,0	0/0:26:26,0	0/0:29:29,0	0/0:17:17,0	0/0:23:23,0	0/0:12:12,0	./.:0:.,.	0/0:19:19,0	0/0:14:14,0	0/0:15:15,0	0/0:14:14,0	0/0:17:17,0	0/1:20:9,11	0/0:27:27,0	0/0:15:15,0	0/0:23:23,0	1/1:19:0,19	1/1:27:1,26	0/0:17:17,0	1/1:25:0,25	./.:0:.,.	0/1:28:12,16	1/1:10:0,10	1/1:16:0,16	0/0:20:20,0	0/0:20:20,0	0/0:24:24,0	0/0:29:29,0	0/0:25:25,0
MockRefGenome	78586	.	G	A	.	PASS	AC=66;AF=0.330;DP=1775;AV=20.03;NS=78	GT:DP:AD	0/1:31:6,25	0/0:64:64,0	1/1:25:0,25	1/1:53:0,53	0/0:20:20,0	./.:0:.,.	1/1:31:0,31	0/0:18:18,0	0/1:57:26,31	0/0:17:17,0	0/0:22:22,0	0/0:25:25,0	0/0:20:20,0	0/0:26:26,0	1/1:27:0,27	0/0:17:17,0	0/0:23:23,0	0/0:12:12,0	./.:0:.,.	1/1:19:0,19	1/1:13:0,13	1/1:15:0,15	0/0:13:13,0	0/0:15:15,0	0/1:20:11,9	0/1:27:16,11	1/1:15:0,15	1/1:23:0,23	0/0:18:18,0	0/0:27:26,1	1/1:17:0,17	0/0:24:24,0	0/0:16:16,0	0/1:26:18,8	0/1:10:5,5	0/0:15:15,0	0/0:20:20,0	0/1:19:5,14	0/1:24:10,14	0/1:28:11,17	0/1:25:16,9
MockRefGenome	78664	.	G	A	.	PASS	AC=9;AF=0.045;DP=1664;AV=18.96;NS=81	GT:DP:AD	0/0:26:26,0	0/0:59:59,0	0/0:23:23,0	0/0:53:53,0	0/0:19:19,0	0/0:16:16,0	0/0:29:29,0	0/0:16:16,0	0/1:54:30,24	0/0:16:16,0	0/0:21:21,0	1/1:23:0,23	0/0:18:18,0	0/0:25:25,0	0/0:25:25,0	0/0:16:16,0	0/0:20:20,0	0/0:12:12,0	./.:0:.,.	0/0:18:18,0	0/0:14:14,0	0/0:14:14,0	0/1:12:9,3	1/1:16:0,16	0/0:20:20,0	0/0:23:23,0	0/0:13:13,0	0/0:22:22,0	0/0:18:18,0	0/0:26:26,0	0/0:17:17,0	0/0:23:23,0	0/0:15:15,0	0/0:27:27,0	0/0:11:11,0	0/0:16:16,0	0/0:15:15,0	0/0:18:18,0	0/0:24:24,0	0/0:28:28,0	0/1:23:18,5
MockRefGenome	78679	.	G	A	.	PASS	AC=35;AF=0.175;DP=1676;AV=19.16;NS=79	GT:DP:AD	0/0:26:26,0	0/1:60:31,29	0/0:23:23,0	0/0:53:53,0	1/1:19:0,19	./.:0:.,.	0/0:30:30,0	0/1:16:11,5	0/0:55:55,0	0/1:16:7,9	0/1:21:14,7	0/0:23:23,0	0/1:18:3,15	0/1:25:13,12	0/0:25:25,0	0/1:16:7,9	0/1:20:7,13	0/1:12:8,4	./.:0:.,.	0/0:18:18,0	0/0:14:14,0	0/0:14:14,0	0/0:12:12,0	0/0:17:17,0	0/1:20:9,11	0/0:23:23,0	0/0:13:13,0	0/0:22:22,0	1/1:18:0,18	1/1:26:1,25	0/0:17:17,0	1/1:23:0,23	./.:0:.,.	0/1:27:12,15	0/1:11:5,6	1/1:16:0,16	0/1:15:5,10	0/0:19:19,0	0/0:25:25,0	0/0:28:28,0	0/0:23:23,0
MockRefGenome	78687	.	G	C	.	PASS	AC=9;AF=0.045;DP=1696;AV=19.11;NS=83	GT:DP:AD	0/0:26:26,0	0/0:61:61,0	0/0:23:23,0	0/0:54:54,0	0/0:19:19,0	0/0:18:18,0	0/0:30:30,0	0/0:16:16,0	0/0:55:55,0	0/0:16:16,0	0/0:22:22,0	0/0:23:23,0	0/0:19:19,0	0/0:25:25,0	0/0:27:27,0	0/0:16:16,0	0/0:21:21,0	0/0:12:12,0	./.:0:.,.	0/0:18:18,0	0/0:14:14,0	0/0:14:14,0	0/1:12:3,9	0/0:17:17,0	0/0:20:20,0	0/1:23:10,13	0/0:13:13,0	0/0:22:22,0	0/0:19:19,0	0/0:26:26,0	0/0:17:17,0	0/0:23:23,0	0/0:15:15,0	0/0:27:27,0	0/0:11:11,0	0/0:16:16,0	0/0:17:17,0	0/0:20:20,0	0/0:25:25,0	0/0:28:28,0	0/0:23:23,0
MockRefGenome	78769	.	G	T	.	PASS	AC=39;AF=0.195;DP=1784;AV=20.12;NS=82	GT:DP:AD	0/0:26:26,0	0/1:66:33,33	0/0:25:25,0	0/0:55:55,0	0/0:21:21,0	0/0:18:18,0	0/0:31:31,0	0/1:18:6,12	0/0:60:60,0	0/1:17:9,8	0/1:22:7,15	0/0:25:25,0	0/1:21:18,3	0/1:26:13,13	0/0:29:29,0	0/1:17:10,7	0/1:24:8,16	0/1:12:3,9	0/0:10:10,0	0/0:19:19,0	0/0:15:15,0	0/0:15:15,0	0/0:13:13,0	0/0:18:18,0	0/0:20:20,0	0/0:27:27,0	0/0:15:15,0	0/0:25:25,0	0/0:19:19,0	0/0:28:28,0	0/0:19:19,0	0/0:27:27,0	./.:0:.,.	0/1:28:25,3	0/0:11:11,0	0/0:16:16,0	0/1:21:15,6	0/1:20:15,5	0/1:25:15,10	0/1:29:18,11	0/1:26:15,11
MockRefGenome	78819	.	A	G	.	PASS	AC=47;AF=0.235;DP=1281;AV=17.83;NS=53	GT:DP:AD	1/1:14:14,0	1/1:22:22,0	0/0:24:0,24	1/1:37:37,0	0/0:14:0,14	0/0:15:0,15	0/0:26:0,26	0/0:10:0,10	0/0:27:0,27	./.:0:.,.	./.:0:.,.	0/0:10:0,10	./.:0:.,.	1/0:40:27,13	0/0:25:0,25	./.:0:.,.	1/1:16:16,0	1/0:12:7,5	./.:0:.,.	./.:0:.,.	./.:0:.,.	./.:0:.,.	./.:0:.,.	./.:0:.,.	./.:0:.,.	0/0:15:0,15	0/0:16:0,16	0/0:26:0,26	0/0:14:0,14	0/0:25:0,25	./.:0:.,.	0/0:17:0,17	./.:0:.,.	./.:0:.,.	0/0:12:0,12	0/0:15:0,15	./.:0:.,.	./.:0:.,.	1/0:22:18,4	1/0:33:24,9	./.:0:.,.
MockRefGenome	78828	.	T	A	.	PASS	AC=21;AF=0.105;DP=1282;AV=17.67;NS=55	GT:DP:AD	0/0:14:14,0	1/1:22:0,22	0/0:24:24,0	0/0:37:37,0	./.:0:.,.	0/0:15:15,0	0/0:26:26,0	1/1:10:0,10	0/1:27:12,15	./.:0:.,.	./.:0:.,.	0/0:10:10,0	./.:0:.,.	0/1:40:6,34	0/1:25:11,14	./.:0:.,.	./.:0:.,.	1/1:12:0,12	./.:0:.,.	./.:0:.,.	./.:0:.,.	0/1:7:3,4	0/0:25:24,1	./.:0:.,.	./.:0:.,.	0/0:15:15,0	1/1:16:0,16	0/0:26:26,0	0/0:14:14,0	0/0:25:25,0	./.:0:.,.	0/0:17:17,0	./.:0:.,.	./.:0:.,.	0/0:12:12,0	0/0:15:15,0	./.:0:.,.	./.:0:.,.	0/0:22:22,0	0/0:33:33,0	./.:0:.,.
MockRefGenome	78876	.	C	G	.	PASS	AC=38;AF=0.190;DP=1244;AV=17.98;NS=52	GT:DP:AD	0/0:14:14,0	0/1:22:12,10	1/1:24:0,24	0/0:37:37,0	./.:0:.,.	0/1:15:7,8	0/0:25:25,0	0/0:10:10,0	0/0:27:27,0	0/1:12:6,6	./.:0:.,.	0/0:10:10,0	./.:0:.,.	0/1:40:34,6	0/1:25:14,11	./.:0:.,.	./.:0:.,.	0/0:12:12,0	./.:0:.,.	./.:0:.,.	./.:0:.,.	./.:0:.,.	0/1:25:12,13	./.:0:.,.	./.:0:.,.	0/0:15:15,0	0/1:16:9,7	1/1:26:0,26	1/1:14:0,14	1/1:25:0,25	./.:0:.,.	1/1:17:0,17	./.:0:.,.	1/1:13:0,13	./.:0:.,.	1/1:14:0,14	./.:0:.,.	./.:0:.,.	0/0:22:22,0	0/1:32:24,8	./.:0:.,.
MockRefGenome	78933	.	C	G	.	PASS	AC=40;AF=0.200;DP=1227;AV=17.30;NS=53	GT:DP:AD	1/1:14:0,14	0/0:22:22,0	0/0:24:24,0	1/1:37:0,37	0/0:13:13,0	0/0:14:14,0	0/0:24:24,0	./.:0:.,.	0/0:27:27,0	./.:0:.,.	./.:0:.,.	./.:0:.,.	./.:0:.,.	0/0:39:39,0	0/0:25:25,0	./.:0:.,.	0/0:13:13,0	0/0:12:12,0	./.:0:.,.	./.:0:.,.	./.:0:.,.	./.:0:.,.	0/0:24:23,1	./.:0:.,.	./.:0:.,.	0/1:15:8,7	0/0:16:16,0	1/1:25:0,25	0/0:12:12,0	0/0:24:24,0	./.:0:.,.	0/0:17:17,0	./.:0:.,.	./.:0:.,.	0/0:10:10,0	0/0:14:14,0	./.:0:.,.	0/1:8:4,4	0/1:21:10,11	0/1:29:10,19	./.:0:.,.
MockRefGenome	79008	.	G	T	.	PASS	AC=32;AF=0.160;DP=1110;AV=15.79;NS=52	GT:DP:AD	1/1:12:0,12	0/0:11:11,0	0/0:20:20,0	1/1:31:0,31	0/0:14:14,0	0/0:12:12,0	0/0:25:25,0	./.:0:.,.	0/0:26:26,0	0/0:11:11,0	./.:0:.,.	./.:0:.,.	./.:0:.,.	0/0:31:31,0	0/0:20:20,0	./.:0:.,.	./.:0:.,.	0/0:10:10,0	./.:0:.,.	./.:0:.,.	./.:0:.,.	./.:0:.,.	0/0:21:20,1	./.:0:.,.	./.:0:.,.	0/0:15:15,0	0/0:14:14,0	0/0:24:24,0	0/0:11:11,0	0/0:24:24,0	./.:0:.,.	0/0:16:16,0	./.:0:.,.	0/0:11:11,0	0/0:11:11,0	0/0:13:13,0	./.:0:.,.	./.:0:.,.	0/1:20:10,10	0/1:26:8,18	./.:0:.,.
MockRefGenome	79018	.	A	G	.	PASS	AC=7;AF=0.035;DP=1150;AV=16.81;NS=53	GT:DP:AD	0/0:12:12,0	0/0:12:12,0	0/0:21:21,0	0/0:33:33,0	0/0:14:14,0	0/0:13:13,0	0/0:26:26,0	./.:0:.,.	0/0:26:26,0	0/0:11:11,0	./.:0:.,.	./.:0:.,.	./.:0:.,.	0/0:33:33,0	0/0:21:21,0	./.:0:.,.	0/0:10:10,0	0/0:12:12,0	./.:0:.,.	./.:0:.,.	./.:0:.,.	./.:0:.,.	0/0:22:22,0	./.:0:.,.	./.:0:.,.	0/0:15:15,0	0/0:14:14,0	0/0:24:24,0	0/1:12:7,5	1/1:24:0,24	./.:0:.,.	0/1:16:8,8	./.:0:.,.	0/0:11:11,0	0/0:12:12,0	0/1:13:6,7	./.:0:.,.	./.:0:.,.	0/0:21:21,0	0/0:27:27,0	./.:0:.,.
MockRefGenome	79068	.	T	C	.	PASS	AC=41;AF=0.205;DP=1268;AV=17.42;NS=57	GT:DP:AD	0/0:19:19,0	./.:0:.,.	1/1:22:0,22	0/0:37:37,0	0/1:14:8,6	1/1:15:0,15	0/0:26:26,0	1/1:10:0,10	1/1:27:0,27	1/1:12:0,12	./.:0:.,.	0/0:10:10,0	./.:0:.,.	0/1:38:6,32	0/1:25:14,11	./.:0:.,.	0/0:15:15,0	0/1:12:6,6	./.:0:.,.	./.:0:.,.	./.:0:.,.	./.:0:.,.	0/1:24:6,18	./.:0:.,.	./.:0:.,.	1/1:15:0,15	0/1:16:9,7	1/1:25:0,25	0/1:14:7,7	0/0:25:25,0	./.:0:.,.	0/1:17:9,8	./.:0:.,.	./.:0:.,.	0/0:12:12,0	0/1:15:9,6	0/1:9:3,6	./.:0:.,.	0/0:21:21,0	0/0:32:32,0	./.:0:.,.
MockRefGenome	79098	.	G	C	.	PASS	AC=13;AF=0.065;DP=1296;AV=17.51;NS=61	GT:DP:AD	0/0:20:20,0	0/0:14:14,0	0/0:22:22,0	0/0:38:38,0	0/0:14:14,0	0/0:15:15,0	0/0:26:26,0	0/0:10:10,0	0/0:27:27,0	0/0:12:12,0	./.:0:.,.	0/0:10:10,0	./.:0:.,.	0/0:40:40,0	0/0:25:25,0	./.:0:.,.	0/0:16:16,0	0/0:12:12,0	./.:0:.,.	./.:0:.,.	./.:0:.,.	./.:0:.,.	0/0:25:25,0	./.:0:.,.	./.:0:.,.	0/0:15:15,0	0/0:16:16,0	0/0:26:26,0	0/0:14:14,0	0/0:25:25,0	./.:0:.,.	0/0:17:17,0	./.:0:.,.	0/0:14:14,0	0/0:12:12,0	0/0:15:15,0	./.:0:.,.	0/1:9:6,3	0/1:22:15,7	0/1:33:29,4	./.:0:.,.
MockRefGenome	79101	.	C	T	.	PASS	AC=29;AF=0.145;DP=1265;AV=17.26;NS=57	GT:DP:AD	0/1:20:6,14	0/0:12:12,0	0/0:24:24,0	1/1:38:1,37	0/0:14:14,0	0/0:15:15,0	0/0:26:26,0	0/0:10:10,0	0/0:27:27,0	0/1:10:6,4	./.:0:.,.	0/0:10:10,0	./.:0:.,.	0/0:40:40,0	0/0:25:25,0	./.:0:.,.	0/0:14:14,0	0/0:12:12,0	./.:0:.,.	./.:0:.,.	./.:0:.,.	./.:0:.,.	0/0:25:24,1	./.:0:.,.	./.:0:.,.	0/0:15:15,0	0/0:16:16,0	0/0:26:26,0	0/0:14:14,0	0/0:25:25,0	./.:0:.,.	0/0:17:17,0	./.:0:.,.	./.:0:.,.	0/0:12:12,0	0/0:15:15,0	./.:0:.,.	0/1:9:5,4	0/1:22:11,11	0/1:33:13,20	./.:0:.,.
MockRefGenome	81129	.	C	A	.	PASS	AC=42;AF=0.210;DP=1826;AV=20.54;NS=82	GT:DP:AD	0/0:32:32,0	0/1:62:33,29	0/0:43:43,0	0/0:42:42,0	0/0:21:21,0	0/0:21:21,0	0/0:18:18,0	0/1:20:8,12	0/0:41:41,0	0/1:17:6,11	0/1:33:7,26	0/0:12:12,0	0/1:19:14,5	0/1:30:21,9	0/0:26:26,0	./.:0:.,.	0/1:26:5,21	0/1:22:6,16	0/0:20:20,0	0/0:20:20,0	0/0:22:22,0	0/0:20:20,0	0/0:12:12,0	0/0:18:18,0	0/0:17:17,0	0/0:15:15,0	0/0:20:20,0	0/0:39:39,0	0/0:20:20,0	0/0:34:34,0	0/0:20:20,0	0/0:12:12,0	1/1:28:0,28	0/1:22:19,3	0/0:17:17,0	0/0:17:17,0	0/1:34:24,10	0/1:17:13,4	0/1:20:12,8	0/1:39:20,19	0/1:11:7,4
MockRefGenome	81219	.	C	T	.	PASS	AC=37;AF=0.185;DP=1766;AV=20.04;NS=81	GT:DP:AD	0/0:30:30,0	0/1:60:28,32	0/0:43:43,0	0/0:42:42,0	1/1:21:0,21	0/0:20:20,0	0/0:18:18,0	0/1:20:12,8	0/0:39:39,0	0/1:17:11,6	0/1:32:25,7	0/0:12:12,0	0/1:19:5,14	0/1:28:8,20	0/0:26:26,0	./.:0:.,.	0/1:24:15,9	0/1:21:11,10	0/0:19:19,0	0/0:19:19,0	0/0:20:20,0	0/0:20:20,0	0/0:12:12,0	0/0:18:18,0	0/1:17:8,9	0/0:13:13,0	0/0:19:19,0	0/0:38:38,0	1/1:19:0,19	1/1:32:1,31	0/0:20:20,0	1/1:10:0,10	0/0:28:28,0	0/1:20:8,12	0/1:16:10,6	1/1:16:0,16	0/1:33:9,24	0/0:17:17,0	0/0:19:19,0	0/0:37:37,0	0/0:11:11,0
MockRefGenome	81312	.	C	T	.	PASS	AC=72;AF=0.360;DP=1785;AV=19.74;NS=82	GT:DP:AD	0/1:32:3,29	0/0:56:56,0	1/1:40:0,40	0/1:47:8,39	0/0:20:20,0	1/1:20:0,20	1/1:14:0,14	0/0:18:18,0	0/1:41:20,21	0/0:17:17,0	0/0:32:32,0	0/0:12:12,0	0/0:17:17,0	0/0:30:30,0	1/1:25:0,25	0/0:10:10,0	0/0:26:26,0	0/0:22:22,0	1/1:19:0,19	1/1:16:0,16	1/1:20:0,20	1/1:20:0,20	./.:0:.,.	0/0:17:17,0	0/1:15:9,6	0/1:12:8,4	1/1:17:0,17	1/1:31:0,31	0/0:16:16,0	0/0:31:30,1	1/1:17:0,17	0/0:11:11,0	0/0:26:26,0	0/1:20:15,5	0/1:15:7,8	0/0:15:15,0	0/0:34:34,0	0/1:16:4,12	0/1:18:7,11	0/1:36:18,18	0/1:10:7,3
MockRefGenome	81354	.	G	C	.	PASS	AC=22;AF=0.110;DP=1872;AV=20.26;NS=88	GT:DP:AD	0/0:34:34,0	0/0:60:60,0	0/0:42:42,0	0/0:51:51,0	1/1:20:0,20	0/0:21:21,0	0/0:17:17,0	0/0:19:19,0	0/0:41:41,0	0/0:17:17,0	0/0:33:33,0	0/0:12:12,0	0/0:19:19,0	0/0:30:30,0	0/0:26:26,0	0/0:11:11,0	0/0:26:26,0	0/0:22:22,0	0/0:19:19,0	0/0:18:18,0	0/0:21:21,0	0/0:20:20,0	0/0:16:16,0	0/0:17:17,0	0/1:17:8,9	0/0:14:14,0	0/0:19:19,0	0/0:34:34,0	1/1:18:0,18	1/1:31:1,30	0/0:20:20,0	1/1:11:0,11	0/0:28:28,0	0/1:22:9,13	1/1:16:0,16	1/1:15:0,15	0/0:34:34,0	0/0:16:16,0	0/0:20:20,0	0/0:36:36,0	0/0:11:11,0
MockRefGenome	84467	.	C	G	.	PASS	AC=61;AF=0.305;DP=985;AV=17.78;NS=41	GT:DP:AD	1/0:28:13,15	0/0:22:0,22	1/1:15:15,0	0/0:42:0,42	1/1:20:20,0	./.:0:.,.	1/0:22:9,13	./.:0:.,.	1/1:50:50,0	./.:0:.,.	./.:0:.,.	1/1:16:16,0	./.:0:.,.	./.:0:.,.	1/1:12:12,0	./.:0:.,.	./.:0:.,.	./.:0:.,.	./.:0:.,.	1/1:12:12,0	./.:0:.,.	./.:0:.,.	1/0:17:6,11	1/1:19:19,0	1/0:21:13,8	1/1:17:17,0	./.:0:.,.	1/0:24:17,7	1/1:24:24,0	1/0:20:10,10	1/0:12:4,8	1/1:23:23,0	1/1:20:20,0	1/0:16:12,4	1/0:11:5,6	1/1:14:14,0	./.:0:.,.	./.:0:.,.	./.:0:.,.	1/1:23:23,0	./.:0:.,.
MockRefGenome	84472	.	T	C	.	PASS	AC=10;AF=0.050;DP=983;AV=17.88;NS=40	GT:DP:AD	0/0:28:28,0	0/0:22:22,0	0/0:15:15,0	0/0:42:42,0	0/0:20:20,0	./.:0:.,.	0/0:22:22,0	./.:0:.,.	0/0:50:50,0	./.:0:.,.	./.:0:.,.	0/0:16:16,0	./.:0:.,.	./.:0:.,.	0/0:12:12,0	./.:0:.,.	./.:0:.,.	./.:0:.,.	./.:0:.,.	0/0:12:12,0	./.:0:.,.	./.:0:.,.	0/0:17:17,0	0/0:19:19,0	0/0:21:21,0	./.:0:.,.	./.:0:.,.	0/0:24:24,0	0/0:23:23,0	0/0:20:20,0	0/0:12:12,0	0/0:23:23,0	0/0:20:20,0	0/0:16:16,0	0/0:11:11,0	0/0:14:14,0	./.:0:.,.	./.:0:.,.	./.:0:.,.	0/1:23:12,11	./.:0:.,.
MockRefGenome	84497	.	A	G	.	PASS	AC=13;AF=0.065;DP=976;AV=18.39;NS=38	GT:DP:AD	0/0:28:28,0	1/1:22:0,22	0/0:15:15,0	0/0:42:42,0	0/0:20:20,0	./.:0:.,.	0/1:22:9,13	./.:0:.,.	0/0:50:50,0	./.:0:.,.	./.:0:.,.	0/0:16:16,0	./.:0:.,.	./.:0:.,.	0/0:12:12,0	./.:0:.,.	./.:0:.,.	./.:0:.,.	./.:0:.,.	0/0:12:12,0	./.:0:.,.	./.:0:.,.	0/1:17:6,11	0/0:19:19,0	0/1:20:12,8	0/0:17:17,0	./.:0:.,.	0/0:24:24,0	0/0:23:23,0	0/1:20:10,10	0/1:12:4,8	0/0:23:23,0	0/0:20:20,0	0/0:16:16,0	0/1:11:5,6	0/0:14:14,0	./.:0:.,.	./.:0:.,.	./.:0:.,.	0/0:23:23,0	./.:0:.,.
MockRefGenome	84501	.	G	C	.	PASS	AC=5;AF=0.025;DP=975;AV=18.21;NS=39	GT:DP:AD	0/1:28:13,15	0/0:22:22,0	0/0:15:15,0	1/1:42:0,42	0/0:20:20,0	./.:0:.,.	0/0:22:22,0	./.:0:.,.	0/0:50:50,0	./.:0:.,.	./.:0:.,.	0/0:16:16,0	./.:0:.,.	./.:0:.,.	0/0:12:12,0	./.:0:.,.	./.:0:.,.	./.:0:.,.	./.:0:.,.	0/0:12:12,0	./.:0:.,.	./.:0:.,.	0/0:17:17,0	0/0:19:19,0	0/0:20:20,0	0/0:17:17,0	./.:0:.,.	0/0:24:24,0	0/0:23:23,0	0/0:20:20,0	0/0:12:12,0	0/0:23:23,0	0/0:20:20,0	0/0:16:16,0	0/0:11:11,0	0/0:14:14,0	./.:0:.,.	./.:0:.,.	./.:0:.,.	0/0:23:23,0	./.:0:.,.
MockRefGenome	84511	.	C	T	.	PASS	AC=9;AF=0.045;DP=968;AV=18.22;NS=37	GT:DP:AD	0/0:28:28,0	0/0:22:22,0	0/0:15:15,0	0/0:42:42,0	1/1:19:0,19	./.:0:.,.	0/0:21:21,0	./.:0:.,.	0/0:50:50,0	./.:0:.,.	./.:0:.,.	0/0:16:16,0	./.:0:.,.	./.:0:.,.	0/0:12:12,0	./.:0:.,.	./.:0:.,.	./.:0:.,.	./.:0:.,.	0/0:12:12,0	./.:0:.,.	./.:0:.,.	0/0:17:17,0	0/0:19:19,0	0/0:20:20,0	0/0:17:17,0	./.:0:.,.	0/0:24:24,0	0/1:23:11,12	0/1:20:10,10	0/0:12:12,0	0/1:22:10,12	./.:0:.,.	0/0:16:16,0	./.:0:.,.	1/1:14:0,14	./.:0:.,.	./.:0:.,.	./.:0:.,.	0/0:23:23,0	./.:0:.,.
MockRefGenome	84545	.	A	C	.	PASS	AC=12;AF=0.060;DP=951;AV=17.34;NS=41	GT:DP:AD	0/0:28:28,0	0/0:22:22,0	0/0:15:15,0	0/0:42:42,0	0/0:19:19,0	./.:0:.,.	1/1:19:0,19	./.:0:.,.	0/0:49:49,0	./.:0:.,.	./.:0:.,.	0/0:16:16,0	./.:0:.,.	./.:0:.,.	0/0:11:11,0	./.:0:.,.	./.:0:.,.	./.:0:.,.	./.:0:.,.	0/0:12:12,0	./.:0:.,.	./.:0:.,.	0/0:17:17,0	0/1:19:9,10	0/1:20:12,8	0/1:16:11,5	./.:0:.,.	1/1:21:0,21	0/0:23:23,0	0/0:20:20,0	0/0:12:12,0	0/0:22:22,0	0/0:20:20,0	0/0:16:16,0	0/0:11:11,0	0/0:14:14,0	./.:0:.,.	./.:0:.,.	./.:0:.,.	0/0:22:21,1	./.:0:.,.
MockRefGenome	84560	.	C	G	.	PASS	AC=40;AF=0.200;DP=940;AV=17.34;NS=38	GT:DP:AD	0/0:28:28,0	0/0:22:22,0	1/1:15:0,15	0/0:42:42,0	0/0:19:19,0	./.:0:.,.	1/1:19:0,19	./.:0:.,.	1/1:49:0,49	./.:0:.,.	./.:0:.,.	1/1:16:0,16	./.:0:.,.	./.:0:.,.	1/1:10:0,10	./.:0:.,.	./.:0:.,.	./.:0:.,.	./.:0:.,.	1/1:11:0,11	./.:0:.,.	./.:0:.,.	1/1:17:0,17	1/1:19:0,19	1/1:19:0,19	./.:0:.,.	./.:0:.,.	1/1:21:0,21	0/0:23:23,0	0/1:20:10,10	1/1:12:0,12	0/0:22:22,0	./.:0:.,.	0/1:16:4,12	0/1:11:5,6	0/0:14:14,0	./.:0:.,.	./.:0:.,.	./.:0:.,.	0/1:22:11,11	./.:0:.,.
MockRefGenome	84658	.	C	A	.	PASS	AC=5;AF=0.025;DP=922;AV=17.31;NS=39	GT:DP:AD	0/1:27:13,14	0/0:17:17,0	0/0:15:15,0	1/1:39:0,39	0/0:19:19,0	./.:0:.,.	0/0:22:22,0	./.:0:.,.	0/0:50:50,0	./.:0:.,.	./.:0:.,.	0/0:16:16,0	./.:0:.,.	./.:0:.,.	0/0:11:11,0	./.:0:.,.	./.:0:.,.	./.:0:.,.	./.:0:.,.	0/0:12:12,0	./.:0:.,.	./.:0:.,.	0/0:17:17,0	0/0:19:19,0	0/0:21:21,0	0/0:17:17,0	./.:0:.,.	0/0:23:23,0	0/0:21:21,0	0/0:18:18,0	0/0:12:12,0	0/0:21:21,0	0/0:17:17,0	0/0:15:15,0	0/0:11:11,0	0/0:13:13,0	./.:0:.,.	./.:0:.,.	./.:0:.,.	0/0:20:20,0	./.:0:.,.
MockRefGenome	84690	.	C	T	.	PASS	AC=10;AF=0.050;DP=965;AV=17.57;NS=40	GT:DP:AD	0/0:28:28,0	0/0:22:22,0	0/0:15:15,0	0/0:42:42,0	1/1:20:0,20	./.:0:.,.	0/0:22:22,0	./.:0:.,.	0/0:50:50,0	./.:0:.,.	./.:0:.,.	0/0:16:16,0	./.:0:.,.	./.:0:.,.	0/0:12:12,0	./.:0:.,.	./.:0:.,.	./.:0:.,.	./.:0:.,.	0/0:12:12,0	./.:0:.,.	./.:0:.,.	0/0:17:17,0	0/0:19:19,0	0/0:21:21,0	0/0:17:17,0	./.:0:.,.	0/0:23:23,0	1/1:24:0,24	0/1:18:10,8	0/0:12:12,0	0/1:23:11,12	./.:0:.,.	0/0:15:15,0	0/0:11:11,0	1/1:14:0,14	./.:0:.,.	./.:0:.,.	./.:0:.,.	0/0:23:23,0	./.:0:.,.
MockRefGenome	84712	.	G	T	.	PASS	AC=5;AF=0.025;DP=987;AV=17.88;NS=41	GT:DP:AD	0/0:28:28,0	0/0:24:24,0	0/0:15:15,0	0/0:42:42,0	0/0:20:20,0	./.:0:.,.	0/0:22:22,0	./.:0:.,.	0/1:50:30,20	./.:0:.,.	./.:0:.,.	0/1:16:8,8	./.:0:.,.	./.:0:.,.	1/1:12:0,12	./.:0:.,.	./.:0:.,.	./.:0:.,.	./.:0:.,.	0/0:12:12,0	./.:0:.,.	./.:0:.,.	0/0:17:17,0	0/1:19:10,9	0/0:21:21,0	0/0:17:17,0	./.:0:.,.	0/0:24:24,0	0/0:24:24,0	0/0:19:19,0	0/0:12:12,0	0/0:23:23,0	0/0:20:20,0	0/0:15:15,0	0/0:11:11,0	0/0:14:14,0	./.:0:.,.	./.:0:.,.	./.:0:.,.	0/0:23:23,0	./.:0:.,.
MockRefGenome	85156	.	C	G	.	PASS	AC=19;AF=0.095;DP=827;AV=13.94;NS=35	GT:DP:AD	0/0:11:11,0	0/0:26:26,0	1/1:13:0,13	0/0:37:37,0	./.:0:.,.	./.:0:.,.	./.:0:.,.	./.:0:.,.	0/0:24:24,0	0/0:10:10,0	0/0:14:14,0	./.:0:.,.	./.:0:.,.	0/0:11:11,0	1/1:26:0,26	./.:0:.,.	0/0:16:16,0	0/0:10:10,0	./.:0:.,.	1/1:12:0,12	./.:0:.,.	0/1:9:4,5	1/1:19:0,19	./.:0:.,.	./.:0:.,.	0/1:6:3,3	./.:0:.,.	./.:0:.,.	./.:0:.,.	0/0:13:13,0	1/1:13:0,13	0/0:15:15,0	./.:0:.,.	1/1:14:0,14	0/0:13:13,0	0/0:11:11,0	0/0:12:12,0	./.:0:.,.	./.:0:.,.	0/0:11:11,0	./.:0:.,.
MockRefGenome	85204	.	T	C	.	PASS	AC=6;AF=0.030;DP=821;AV=14.24;NS=33	GT:DP:AD	0/0:11:11,0	0/0:26:26,0	0/1:13:5,8	0/0:37:37,0	./.:0:.,.	./.:0:.,.	./.:0:.,.	./.:0:.,.	0/0:24:24,0	0/0:10:10,0	0/0:14:14,0	./.:0:.,.	./.:0:.,.	0/0:11:11,0	0/1:25:11,14	./.:0:.,.	0/0:16:16,0	0/0:10:10,0	./.:0:.,.	1/1:12:0,12	./.:0:.,.	./.:0:.,.	0/0:19:19,0	./.:0:.,.	./.:0:.,.	./.:0:.,.	./.:0:.,.	./.:0:.,.	./.:0:.,.	0/0:13:13,0	0/0:12:12,0	0/0:15:15,0	./.:0:.,.	0/0:13:13,0	0/0:13:13,0	0/0:11:11,0	0/0:12:12,0	./.:0:.,.	./.:0:.,.	0/0:11:11,0	./.:0:.,.
MockRefGenome	85219	.	A	G	.	PASS	AC=8;AF=0.040;DP=818;AV=14.38;NS=32	GT:DP:AD	0/0:11:11,0	0/0:26:26,0	0/0:13:13,0	0/0:37:37,0	./.:0:.,.	./.:0:.,.	./.:0:.,.	./.:0:.,.	0/0:24:24,0	0/0:10:10,0	0/0:14:14,0	./.:0:.,.	./.:0:.,.	0/0:11:11,0	0/0:25:25,0	./.:0:.,.	0/0:16:16,0	0/0:10:10,0	./.:0:.,.	0/0:12:12,0	./.:0:.,.	./.:0:.,.	0/0:19:19,0	./.:0:.,.	./.:0:.,.	./.:0:.,.	./.:0:.,.	./.:0:.,.	./.:0:.,.	1/1:13:0,13	0/0:12:12,0	1/1:15:0,15	./.:0:.,.	0/0:13:13,0	1/1:13:0,13	1/1:11:0,11	0/0:12:12,0	./.:0:.,.	./.:0:.,.	0/0:10:10,0	./.:0:.,.
MockRefGenome	85254	.	G	C	.	PASS	AC=6;AF=0.030;DP=723;AV=14.12;NS=25	GT:DP:AD	0/0:10:10,0	0/0:25:25,0	0/0:13:13,0	0/0:34:34,0	./.:0:.,.	./.:0:.,.	./.:0:.,.	./.:0:.,.	0/0:24:24,0	./.:0:.,.	0/0:13:13,0	./.:0:.,.	./.:0:.,.	0/0:10:10,0	0/0:23:23,0	./.:0:.,.	0/0:13:13,0	./.:0:.,.	./.:0:.,.	./.:0:.,.	./.:0:.,.	./.:0:.,.	0/0:15:15,0	./.:0:.,.	./.:0:.,.	./.:0:.,.	./.:0:.,.	./.:0:.,.	./.:0:.,.	0/1:11:4,7	0/0:11:11,0	1/1:15:0,15	./.:0:.,.	0/0:13:13,0	1/1:10:0,10	0/1:9:3,6	0/0:11:11,0	./.:0:.,.	./.:0:.,.	0/0:11:11,0	./.:0:.,.
MockRefGenome	85285	.	T	C	.	PASS	AC=9;AF=0.045;DP=743;AV=13.83;NS=29	GT:DP:AD	0/0:10:10,0	0/0:26:26,0	0/1:13:8,5	0/0:34:34,0	./.:0:.,.	./.:0:.,.	./.:0:.,.	./.:0:.,.	0/0:24:24,0	./.:0:.,.	0/0:13:13,0	./.:0:.,.	./.:0:.,.	0/0:10:10,0	0/0:23:23,0	./.:0:.,.	0/0:14:14,0	./.:0:.,.	./.:0:.,.	0/0:10:10,0	./.:0:.,.	./.:0:.,.	0/0:17:17,0	./.:0:.,.	./.:0:.,.	./.:0:.,.	./.:0:.,.	./.:0:.,.	./.:0:.,.	1/1:11:0,11	0/0:11:11,0	1/1:15:0,15	./.:0:.,.	0/0:13:13,0	1/1:12:0,12	0/1:9:3,6	0/0:11:11,0	./.:0:.,.	./.:0:.,.	0/0:11:11,0	./.:0:.,.
MockRefGenome	85286	.	T	C	.	PASS	AC=9;AF=0.045;DP=744;AV=13.86;NS=29	GT:DP:AD	0/0:10:10,0	0/0:26:26,0	0/1:13:8,5	0/0:34:34,0	./.:0:.,.	./.:0:.,.	./.:0:.,.	./.:0:.,.	0/0:24:24,0	./.:0:.,.	0/0:13:13,0	./.:0:.,.	./.:0:.,.	0/0:10:10,0	0/0:23:23,0	./.:0:.,.	0/0:14:14,0	./.:0:.,.	./.:0:.,.	0/0:11:11,0	./.:0:.,.	./.:0:.,.	0/0:17:17,0	./.:0:.,.	./.:0:.,.	./.:0:.,.	./.:0:.,.	./.:0:.,.	./.:0:.,.	1/1:11:0,11	0/0:12:12,0	1/1:15:0,15	./.:0:.,.	0/0:13:13,0	1/1:12:0,12	0/1:9:3,6	0/0:11:11,0	./.:0:.,.	./.:0:.,.	0/0:11:11,0	./.:0:.,.
MockRefGenome	85336	.	A	T	.	PASS	AC=7;AF=0.035;DP=801;AV=14.72;NS=29	GT:DP:AD	0/0:11:11,0	0/0:26:26,0	0/0:13:13,0	0/0:37:37,0	./.:0:.,.	./.:0:.,.	./.:0:.,.	./.:0:.,.	0/0:24:24,0	./.:0:.,.	0/0:14:14,0	./.:0:.,.	./.:0:.,.	0/0:10:10,0	0/0:26:25,1	./.:0:.,.	0/0:16:16,0	0/0:10:10,0	./.:0:.,.	0/0:12:12,0	./.:0:.,.	./.:0:.,.	0/0:19:19,0	./.:0:.,.	./.:0:.,.	./.:0:.,.	./.:0:.,.	./.:0:.,.	./.:0:.,.	1/1:13:0,13	0/0:13:13,0	1/1:15:0,15	./.:0:.,.	0/0:14:14,0	1/1:13:0,13	0/1:9:3,6	0/0:12:12,0	./.:0:.,.	./.:0:.,.	0/0:11:11,0	./.:0:.,.
MockRefGenome	87079	.	C	T	.	PASS	AC=40;AF=0.200;DP=2047;AV=22.75;NS=85	GT:DP:AD	0/0:33:32,1	0/0:91:91,0	./.:0:.,.	0/0:66:66,0	0/0:18:18,0	0/1:15:8,7	0/0:35:35,0	0/0:16:16,0	0/0:54:54,0	0/0:21:21,0	0/0:41:41,0	0/0:14:14,0	0/0:31:31,0	0/0:35:35,0	0/0:33:33,0	0/0:27:27,0	0/0:28:28,0	0/0:27:27,0	1/1:23:0,23	1/1:19:0,19	0/0:27:27,0	0/0:24:24,0	0/1:23:17,6	1/1:18:0,18	0/1:22:12,10	./.:0:.,.	0/1:31:21,10	0/1:45:21,24	0/0:20:20,0	./.:0:.,.	1/1:19:0,19	0/0:21:21,0	0/0:19:19,0	0/0:31:31,0	0/0:25:25,0	./.:0:.,.	0/0:24:24,0	0/1:23:16,7	0/1:37:20,17	0/1:22:9,13	0/1:17:6,11
MockRefGenome	87088	.	C	A	.	PASS	AC=47;AF=0.235;DP=2054;AV=22.34;NS=85	GT:DP:AD	0/1:33:11,22	0/0:91:91,0	0/0:26:26,0	./.:0:.,.	0/0:18:18,0	0/0:15:15,0	0/0:35:34,1	0/0:16:16,0	0/0:54:54,0	0/0:21:21,0	0/0:41:41,0	0/0:14:14,0	0/0:31:31,0	0/0:35:35,0	0/0:33:33,0	0/0:27:27,0	0/1:28:18,10	0/0:27:27,0	0/0:24:24,0	0/0:19:19,0	0/0:27:27,0	0/0:24:24,0	0/0:23:23,0	0/0:18:18,0	0/0:22:22,0	0/0:15:15,0	0/0:31:31,0	0/0:47:47,0	0/0:20:20,0	./.:0:.,.	0/0:19:19,0	0/0:21:21,0	0/0:19:19,0	0/0:31:31,0	0/0:25:25,0	./.:0:.,.	0/0:24:24,0	0/1:23:14,9	0/1:37:25,12	0/1:22:13,9	0/1:17:11,6
MockRefGenome	87090	.	G	C	.	PASS	AC=12;AF=0.060;DP=2053;AV=22.81;NS=86	GT:DP:AD	0/0:33:33,0	0/0:91:91,0	0/0:26:26,0	0/0:66:66,0	0/0:18:18,0	0/0:15:15,0	0/0:35:35,0	0/1:16:12,4	0/0:54:54,0	0/1:21:6,15	0/1:41:22,19	0/0:14:14,0	0/1:31:18,13	0/0:35:35,0	0/0:33:33,0	0/0:27:27,0	0/1:28:24,4	0/0:27:27,0	0/0:24:24,0	0/0:19:19,0	0/0:27:27,0	0/0:24:24,0	0/0:23:23,0	0/0:18:18,0	0/0:22:22,0	0/0:15:15,0	0/0:31:31,0	0/0:47:47,0	0/0:20:20,0	./.:0:.,.	0/0:19:19,0	0/0:21:21,0	0/0:19:19,0	0/0:31:31,0	0/0:25:25,0	./.:0:.,.	0/0:24:24,0	0/0:23:23,0	0/0:37:37,0	0/0:22:22,0	0/0:17:17,0
MockRefGenome	87091	.	C	A	.	PASS	AC=43;AF=0.215;DP=2054;AV=22.86;NS=86	GT:DP:AD	0/1:33:23,10	1/1:91:0,91	0/0:26:26,0	0/0:66:66,0	0/1:18:7,11	0/0:15:15,0	0/0:35:35,0	1/1:16:0,16	0/0:54:54,0	1/1:21:0,21	1/1:41:0,41	0/0:14:14,0	1/1:31:0,31	1/1:35:0,35	0/0:33:33,0	1/1:27:0,27	0/1:28:10,18	1/1:27:0,27	0/0:24:24,0	0/0:19:19,0	0/0:27:27,0	0/0:24:24,0	0/0:23:23,0	0/0:18:18,0	0/0:22:22,0	0/0:15:15,0	0/0:31:31,0	0/0:47:47,0	0/0:20:20,0	./.:0:.,.	0/0:19:19,0	0/0:21:21,0	0/1:19:5,14	0/1:31:21,10	0/1:25:12,13	./.:0:.,.	1/1:24:0,24	0/0:23:23,0	0/0:37:37,0	0/0:22:22,0	0/0:17:17,0
MockRefGenome	87169	.	A	G	.	PASS	AC=39;AF=0.195;DP=2012;AV=22.38;NS=85	GT:DP:AD	0/0:33:32,1	0/0:91:91,0	./.:0:.,.	0/0:65:65,0	0/0:17:17,0	0/1:15:8,7	0/0:34:34,0	0/0:15:15,0	0/0:52:52,0	0/0:21:21,0	0/0:40:40,0	0/0:13:13,0	0/0:31:31,0	0/0:34:34,0	0/0:33:33,0	0/0:26:26,0	0/0:28:28,0	0/0:26:26,0	1/1:24:0,24	1/1:19:0,19	0/0:27:27,0	0/0:24:24,0	0/1:22:17,5	1/1:17:0,17	0/1:22:12,10	./.:0:.,.	0/1:30:20,10	0/0:45:45,0	0/0:20:20,0	./.:0:.,.	1/1:19:0,19	0/0:20:20,0	0/0:18:18,0	0/0:30:30,0	0/0:25:25,0	./.:0:.,.	0/0:24:24,0	0/1:22:15,7	0/1:37:20,17	0/1:22:9,13	0/1:16:6,10
MockRefGenome	87198	.	C	T	.	PASS	AC=10;AF=0.050;DP=1998;AV=22.61;NS=83	GT:DP:AD	0/0:32:32,0	0/1:91:27,64	0/0:26:26,0	0/0:64:64,0	0/0:17:17,0	0/0:15:15,0	0/0:32:32,0	0/1:14:9,5	0/0:52:52,0	0/0:21:21,0	0/0:40:40,0	0/0:13:13,0	0/1:31:13,18	0/0:34:34,0	0/0:32:32,0	0/1:26:23,3	0/1:28:20,8	0/1:26:3,23	0/0:24:24,0	0/0:19:19,0	0/0:27:27,0	0/0:23:23,0	0/0:22:22,0	0/0:17:17,0	0/0:22:22,0	0/0:14:14,0	0/0:29:29,0	0/0:45:45,0	0/0:20:20,0	./.:0:.,.	0/0:19:19,0	0/0:20:20,0	0/0:18:18,0	0/0:29:29,0	0/0:25:25,0	./.:0:.,.	0/1:24:9,15	0/0:22:22,0	0/0:37:37,0	0/0:22:22,0	0/0:16:16,0
MockRefGenome	87199	.	G	A	.	PASS	AC=15;AF=0.075;DP=1998;AV=22.54;NS=83	GT:DP:AD	0/0:32:32,0	0/0:91:91,0	0/0:26:26,0	0/0:64:64,0	./.:0:.,.	0/0:15:15,0	0/1:32:21,11	0/0:14:14,0	0/1:52:30,22	0/0:21:21,0	0/0:40:40,0	0/0:13:13,0	0/0:31:31,0	0/0:34:34,0	1/1:32:0,32	0/0:26:26,0	0/0:28:28,0	0/0:26:26,0	0/0:24:24,0	0/0:19:19,0	0/1:27:10,17	0/1:23:17,6	0/1:22:10,12	0/0:17:17,0	0/0:22:22,0	./.:0:.,.	0/0:29:29,0	0/1:45:20,25	./.:0:.,.	./.:0:.,.	0/0:19:19,0	0/0:20:20,0	0/0:18:18,0	0/0:29:29,0	0/0:25:25,0	./.:0:.,.	0/0:24:24,0	0/1:22:15,7	0/0:37:37,0	0/0:22:22,0	0/0:16:16,0
MockRefGenome	87266	.	G	A	.	PASS	AC=20;AF=0.100;DP=1889;AV=21.60;NS=82	GT:DP:AD	0/0:30:29,1	0/0:86:86,0	./.:0:.,.	0/0:62:62,0	0/0:18:18,0	0/0:13:13,0	0/0:31:31,0	0/0:16:16,0	0/0:48:48,0	0/0:17:17,0	0/0:38:38,0	0/0:12:12,0	0/0:29:29,0	0/0:34:34,0	0/0:32:32,0	0/0:23:23,0	0/0:26:26,0	0/0:25:25,0	0/0:24:24,0	0/0:19:19,0	0/0:24:24,0	0/0:24:24,0	0/1:21:16,5	0/0:18:18,0	0/0:21:21,0	./.:0:.,.	0/0:30:30,0	0/0:41:41,0	0/0:20:20,0	./.:0:.,.	0/0:19:19,0	0/0:18:18,0	0/0:18:18,0	0/0:30:30,0	0/0:22:22,0	./.:0:.,.	0/0:20:20,0	0/1:21:14,7	0/1:37:20,17	0/1:21:15,6	0/1:17:6,11
MockRefGenome	87279	.	G	A	.	PASS	AC=16;AF=0.080;DP=1915;AV=21.47;NS=86	GT:DP:AD	0/0:31:31,0	0/0:87:87,0	0/0:22:22,0	0/0:62:62,0	0/1:18:7,11	0/0:14:14,0	0/1:32:15,17	0/0:16:16,0	0/1:48:20,28	0/0:18:18,0	0/0:38:38,0	0/1:12:5,7	0/0:29:29,0	0/0:34:34,0	0/0:32:32,0	0/0:23:23,0	0/0:26:26,0	0/0:25:25,0	0/0:24:24,0	0/0:19:19,0	0/1:24:14,10	0/1:24:6,18	0/1:21:16,5	0/0:18:18,0	0/0:21:21,0	0/0:15:15,0	0/0:30:30,0	0/0:43:43,0	0/0:21:21,0	0/1:10:3,7	0/0:19:19,0	0/0:18:18,0	0/0:18:18,0	0/0:30:30,0	0/1:22:11,11	./.:0:.,.	0/0:21:21,0	0/0:22:22,0	0/0:37:37,0	0/0:21:21,0	0/0:17:17,0
MockRefGenome	87288	.	C	G	.	PASS	AC=54;AF=0.270;DP=1916;AV=21.49;NS=82	GT:DP:AD	0/0:22:21,1	0/0:87:87,0	./.:0:.,.	0/0:63:63,0	0/0:18:18,0	0/1:15:8,7	0/0:32:32,0	0/1:13:9,4	0/0:48:48,0	0/0:18:18,0	0/1:38:18,20	0/0:12:12,0	0/0:30:30,0	0/1:34:27,7	0/0:32:32,0	0/1:24:11,13	0/1:27:17,10	0/1:26:22,4	1/1:24:0,24	1/1:19:0,19	0/0:25:25,0	0/0:24:24,0	0/1:21:16,5	1/1:18:0,18	0/1:21:11,10	./.:0:.,.	0/1:30:20,10	0/0:44:44,0	0/0:21:21,0	0/0:10:10,0	1/1:19:0,19	0/1:20:9,11	./.:0:.,.	0/1:31:21,10	0/1:22:11,11	./.:0:.,.	./.:0:.,.	0/1:23:16,7	0/1:37:20,17	0/1:21:8,13	0/1:17:6,11
MockRefGenome	87294	.	C	T	.	PASS	AC=79;AF=0.395;DP=1955;AV=21.24;NS=83	GT:DP:AD	1/1:32:1,31	1/1:85:0,85	0/0:24:24,0	./.:0:.,.	0/1:18:12,6	0/0:15:15,0	./.:0:.,.	0/1:16:4,12	0/0:48:48,0	1/1:19:0,19	0/1:39:20,19	0/0:12:12,0	1/1:30:0,30	0/1:34:7,27	0/0:33:33,0	0/1:25:13,12	0/1:27:10,17	0/1:26:4,22	0/0:24:24,0	0/0:19:19,0	0/0:26:26,0	0/0:24:24,0	0/0:21:21,0	0/0:18:18,0	0/0:21:21,0	0/0:15:15,0	0/0:30:30,0	0/0:44:44,0	1/1:21:0,21	0/1:10:7,3	0/0:19:19,0	0/1:20:11,9	./.:0:.,.	0/1:31:10,21	0/0:22:22,0	./.:0:.,.	0/1:22:8,14	0/1:23:14,9	0/1:37:25,12	0/1:21:13,8	0/1:17:11,6
MockRefGenome	87297	.	C	T	.	PASS	AC=54;AF=0.270;DP=1962;AV=21.96;NS=84	GT:DP:AD	0/0:32:31,1	0/0:87:87,0	./.:0:.,.	0/0:63:63,0	0/0:18:18,0	0/1:15:8,7	0/0:33:33,0	0/1:16:12,4	0/0:48:48,0	0/0:19:19,0	0/1:39:19,20	0/0:12:12,0	0/0:30:30,0	0/1:34:27,7	0/0:33:33,0	0/1:25:12,13	0/1:27:17,10	0/1:26:22,4	1/1:24:0,24	1/1:19:0,19	0/0:26:26,0	0/0:24:24,0	0/1:21:16,5	1/1:18:0,18	0/1:21:11,10	./.:0:.,.	0/1:30:20,10	0/0:44:44,0	0/0:21:21,0	0/0:10:10,0	1/1:19:0,19	0/1:20:9,11	0/0:18:18,0	0/0:31:31,0	0/1:22:11,11	./.:0:.,.	0/1:22:20,2	0/1:23:16,7	0/1:37:20,17	0/1:21:8,13	0/1:17:6,11
MockRefGenome	87377	.	C	T	.	PASS	AC=41;AF=0.205;DP=2060;AV=22.73;NS=86	GT:DP:AD	0/0:33:32,1	0/0:90:90,0	./.:0:.,.	0/0:66:66,0	0/0:18:18,0	0/1:15:8,7	0/0:35:35,0	0/0:16:16,0	0/0:54:54,0	0/0:21:21,0	0/0:41:41,0	0/0:14:14,0	0/0:31:31,0	0/0:35:35,0	0/0:34:34,0	0/0:27:27,0	0/0:28:28,0	0/0:27:27,0	1/1:24:0,24	1/1:19:0,19	0/0:27:27,0	0/0:24:24,0	0/1:22:17,5	1/1:17:0,17	0/1:22:12,10	./.:0:.,.	0/1:31:21,10	0/1:48:22,26	0/0:22:22,0	0/0:10:10,0	1/1:19:0,19	0/0:21:21,0	0/0:19:19,0	0/0:31:31,0	0/0:25:25,0	./.:0:.,.	0/0:24:24,0	0/1:23:16,7	0/1:37:20,17	0/1:22:9,13	0/1:17:6,11
MockRefGenome	87414	.	A	G	.	PASS	AC=8;AF=0.040;DP=892;AV=17.90;NS=39	GT:DP:AD	./.:0:.,.	0/0:84:84,0	./.:0:.,.	./.:0:.,.	0/1:14:3,11	0/0:10:10,0	0/0:11:11,0	./.:0:.,.	0/0:66:66,0	./.:0:.,.	./.:0:.,.	0/0:14:14,0	0/0:16:16,0	0/0:13:13,0	./.:0:.,.	0/0:15:15,0	0/0:36:36,0	0/0:21:21,0	0/1:11:5,6	0/0:11:11,0	0/1:12:7,5	0/1:12:6,6	0/0:17:17,0	0/0:12:12,0	./.:0:.,.	0/1:25:13,12	0/0:16:16,0	0/0:13:13,0	0/0:21:20,1	0/0:15:15,0	1/1:14:0,14	./.:0:.,.	./.:0:.,.	./.:0:.,.	0/0:17:17,0	0/0:16:16,0	0/0:21:21,0	./.:0:.,.	./.:0:.,.	./.:0:.,.	./.:0:.,.
MockRefGenome	87435	.	G	A	.	PASS	AC=31;AF=0.155;DP=892;AV=17.92;NS=39	GT:DP:AD	./.:0:.,.	0/0:84:84,0	./.:0:.,.	./.:0:.,.	0/0:14:14,0	1/1:10:0,10	1/1:11:0,11	./.:0:.,.	1/1:66:0,66	./.:0:.,.	./.:0:.,.	1/1:14:0,14	0/0:16:16,0	0/0:13:13,0	./.:0:.,.	0/0:15:15,0	0/0:36:36,0	0/0:21:21,0	0/1:11:6,5	1/1:11:0,11	0/1:12:5,7	0/1:12:6,6	1/1:17:0,17	1/1:12:0,12	./.:0:.,.	0/1:25:12,13	0/1:16:10,6	1/1:13:0,13	0/0:21:21,0	0/0:15:15,0	0/0:14:14,0	./.:0:.,.	./.:0:.,.	./.:0:.,.	0/0:17:17,0	0/0:16:16,0	0/0:21:21,0	./.:0:.,.	./.:0:.,.	./.:0:.,.	./.:0:.,.
MockRefGenome	87474	.	C	A	.	PASS	AC=30;AF=0.150;DP=885;AV=18.16;NS=37	GT:DP:AD	./.:0:.,.	0/1:83:59,24	./.:0:.,.	./.:0:.,.	0/0:14:14,0	1/1:10:0,10	0/0:11:11,0	./.:0:.,.	0/1:66:34,32	./.:0:.,.	./.:0:.,.	0/0:14:14,0	0/1:16:12,4	0/1:12:7,5	./.:0:.,.	0/1:15:7,8	0/1:36:10,26	0/1:21:18,3	0/1:10:6,4	1/1:11:0,11	0/1:12:7,5	0/1:12:8,4	0/0:17:17,0	1/1:12:0,12	./.:0:.,.	0/1:25:13,12	0/1:16:10,6	1/1:13:0,13	0/1:21:11,10	0/0:15:15,0	0/0:14:14,0	./.:0:.,.	./.:0:.,.	./.:0:.,.	0/1:17:6,11	0/0:16:16,0	0/1:20:16,4	./.:0:.,.	./.:0:.,.	./.:0:.,.	./.:0:.,.
MockRefGenome	87483	.	T	G	.	PASS	AC=18;AF=0.090;DP=880;AV=17.38;NS=40	GT:DP:AD	./.:0:.,.	0/0:82:82,0	./.:0:.,.	./.:0:.,.	1/1:14:0,14	0/0:10:10,0	0/0:11:11,0	./.:0:.,.	0/0:66:66,0	./.:0:.,.	./.:0:.,.	0/0:14:14,0	0/0:16:16,0	0/0:12:12,0	./.:0:.,.	0/0:15:15,0	0/0:35:35,0	0/0:21:21,0	1/1:10:0,10	1/1:11:0,11	./.:0:.,.	0/1:12:6,6	0/0:17:17,0	0/0:12:12,0	0/1:9:4,5	0/1:25:13,12	0/1:15:9,6	0/0:13:13,0	0/0:21:20,1	1/1:15:0,15	1/1:14:0,14	./.:0:.,.	./.:0:.,.	./.:0:.,.	0/0:17:17,0	0/1:16:7,9	0/0:20:20,0	./.:0:.,.	./.:0:.,.	./.:0:.,.	./.:0:.,.
MockRefGenome	87571	.	A	G	.	PASS	AC=14;AF=0.070;DP=695;AV=17.55;NS=29	GT:DP:AD	./.:0:.,.	0/0:64:64,0	./.:0:.,.	./.:0:.,.	./.:0:.,.	./.:0:.,.	0/0:10:10,0	./.:0:.,.	0/0:63:63,0	./.:0:.,.	./.:0:.,.	0/0:13:13,0	0/0:16:16,0	0/0:12:12,0	1/1:12:0,12	0/0:15:15,0	0/0:34:34,0	0/0:17:17,0	0/1:10:6,4	1/1:11:0,11	0/1:10:6,4	0/0:11:11,0	0/1:13:7,6	0/0:12:12,0	1/1:10:0,10	0/0:24:24,0	0/1:13:7,6	1/1:29:0,29	./.:0:.,.	./.:0:.,.	0/0:10:10,0	./.:0:.,.	./.:0:.,.	./.:0:.,.	./.:0:.,.	./.:0:.,.	./.:0:.,.	./.:0:.,.	./.:0:.,.	./.:0:.,.	./.:0:.,.
MockRefGenome	87707	.	C	T	.	PASS	AC=7;AF=0.035;DP=796;AV=19.06;NS=33	GT:DP:AD	./.:0:.,.	0/0:67:67,0	./.:0:.,.	./.:0:.,.	./.:0:.,.	0/0:10:10,0	0/0:11:11,0	./.:0:.,.	0/0:66:66,0	./.:0:.,.	./.:0:.,.	0/0:14:14,0	0/0:16:16,0	0/0:13:13,0	0/0:13:13,0	0/0:15:15,0	0/0:36:36,0	0/0:19:19,0	0/1:23:5,18	0/0:11:11,0	0/1:24:7,17	0/1:14:6,8	0/0:17:17,0	0/0:12:12,0	0/0:10:10,0	0/1:25:13,12	0/0:16:16,0	0/0:29:29,0	./.:0:.,.	./.:0:.,.	1/1:14:0,14	./.:0:.,.	./.:0:.,.	./.:0:.,.	./.:0:.,.	./.:0:.,.	0/0:11:11,0	./.:0:.,.	./.:0:.,.	./.:0:.,.	./.:0:.,.
MockRefGenome	89340	.	C	T	.	PASS	AC=9;AF=0.045;DP=595;AV=19.05;NS=21	GT:DP:AD	0/0:11:11,0	0/1:82:34,48	./.:0:.,.	0/0:16:16,0	./.:0:.,.	./.:0:.,.	./.:0:.,.	./.:0:.,.	./.:0:.,.	0/0:13:13,0	0/1:29:12,17	./.:0:.,.	0/0:19:19,0	0/1:14:9,5	./.:0:.,.	0/1:8:5,3	0/0:23:23,0	0/1:37:27,10	./.:0:.,.	./.:0:.,.	./.:0:.,.	./.:0:.,.	0/0:13:13,0	./.:0:.,.	./.:0:.,.	./.:0:.,.	./.:0:.,.	./.:0:.,.	./.:0:.,.	./.:0:.,.	./.:0:.,.	./.:0:.,.	./.:0:.,.	./.:0:.,.	./.:0:.,.	./.:0:.,.	0/0:11:11,0	./.:0:.,.	./.:0:.,.	./.:0:.,.	./.:0:.,.
MockRefGenome	90143	.	C	G	.	PASS	AC=18;AF=0.090;DP=923;AV=17.73;NS=41	GT:DP:AD	1/1:11:0,11	0/0:84:84,0	0/0:25:25,0	1/1:15:0,15	0/0:25:25,0	./.:0:.,.	1/1:10:0,10	./.:0:.,.	0/0:16:16,0	./.:0:.,.	0/0:22:22,0	0/0:12:12,0	0/0:16:16,0	0/0:19:19,0	0/0:27:27,0	0/0:10:10,0	0/0:22:22,0	0/0:22:22,0	./.:0:.,.	./.:0:.,.	./.:0:.,.	0/0:11:11,0	0/0:26:26,0	./.:0:.,.	0/1:9:6,3	0/0:19:19,0	./.:0:.,.	0/1:23:16,7	./.:0:.,.	0/0:25:25,0	0/1:14:7,7	1/1:12:0,12	0/1:13:7,6	0/1:24:13,11	0/0:20:20,0	0/0:23:23,0	0/0:25:25,0	0/1:10:6,4	0/1:12:9,3	./.:0:.,.	0/0:10:10,0
MockRefGenome	90147	.	G	T	.	PASS	AC=10;AF=0.050;DP=929;AV=17.55;NS=42	GT:DP:AD	0/0:11:11,0	0/1:84:58,26	0/0:25:25,0	0/0:15:15,0	0/0:25:25,0	./.:0:.,.	0/0:10:10,0	./.:0:.,.	0/0:16:16,0	./.:0:.,.	0/1:21:16,5	0/0:12:12,0	0/0:16:16,0	0/1:19:13,6	0/0:27:27,0	0/0:10:10,0	0/1:22:14,8	0/1:22:5,17	./.:0:.,.	./.:0:.,.	./.:0:.,.	0/0:11:11,0	0/0:26:26,0	./.:0:.,.	./.:0:.,.	0/0:19:19,0	./.:0:.,.	0/0:23:23,0	./.:0:.,.	0/0:24:24,0	0/0:14:14,0	0/0:12:12,0	0/0:13:13,0	0/0:24:24,0	0/0:20:20,0	0/0:23:23,0	0/0:25:25,0	0/0:10:10,0	0/0:12:12,0	0/0:13:13,0	0/0:10:10,0
MockRefGenome	90152	.	G	C	.	PASS	AC=5;AF=0.025;DP=928;AV=17.73;NS=41	GT:DP:AD	0/0:11:11,0	0/0:84:84,0	0/0:25:25,0	1/1:15:0,15	0/0:24:24,0	./.:0:.,.	0/0:10:10,0	./.:0:.,.	0/0:16:16,0	./.:0:.,.	0/0:22:22,0	0/0:12:12,0	0/0:16:16,0	0/0:19:19,0	0/0:26:26,0	0/0:10:10,0	0/0:22:22,0	0/0:22:22,0	./.:0:.,.	./.:0:.,.	./.:0:.,.	0/0:11:11,0	0/0:26:26,0	./.:0:.,.	./.:0:.,.	0/0:19:19,0	./.:0:.,.	0/0:23:23,0	./.:0:.,.	0/0:24:24,0	0/0:14:14,0	0/0:12:12,0	0/0:13:13,0	0/0:24:24,0	0/0:20:20,0	0/0:23:23,0	0/0:25:25,0	0/0:10:10,0	0/0:12:12,0	0/0:13:13,0	0/0:10:10,0
MockRefGenome	90167	.	C	A	.	PASS	AC=5;AF=0.025;DP=923;AV=17.61;NS=41	GT:DP:AD	0/0:11:11,0	0/0:83:83,0	0/0:25:25,0	1/1:15:0,15	0/0:23:23,0	./.:0:.,.	0/0:10:10,0	./.:0:.,.	0/0:16:16,0	./.:0:.,.	0/0:22:22,0	0/0:12:12,0	0/0:16:16,0	0/0:19:19,0	0/0:26:26,0	0/0:10:10,0	0/0:22:22,0	0/0:22:22,0	./.:0:.,.	./.:0:.,.	./.:0:.,.	0/0:10:10,0	0/0:26:26,0	./.:0:.,.	./.:0:.,.	0/0:19:19,0	./.:0:.,.	0/0:23:23,0	./.:0:.,.	0/0:24:24,0	0/0:14:14,0	0/0:12:12,0	0/0:13:13,0	0/0:24:24,0	0/0:20:20,0	0/0:22:22,0	0/0:24:24,0	0/0:10:10,0	0/0:12:12,0	0/0:13:13,0	0/0:10:10,0
MockRefGenome	90274	.	G	A	.	PASS	AC=12;AF=0.060;DP=743;AV=17.07;NS=30	GT:DP:AD	0/0:11:11,0	0/1:49:23,26	0/0:22:22,0	./.:0:.,.	0/0:25:25,0	./.:0:.,.	0/0:10:10,0	./.:0:.,.	0/0:15:15,0	./.:0:.,.	1/1:21:0,21	0/0:14:14,0	./.:0:.,.	1/1:13:0,13	0/0:26:26,0	./.:0:.,.	./.:0:.,.	1/1:14:0,14	./.:0:.,.	./.:0:.,.	./.:0:.,.	0/0:10:10,0	0/0:26:26,0	./.:0:.,.	./.:0:.,.	0/0:17:17,0	./.:0:.,.	0/0:24:24,0	./.:0:.,.	0/0:25:25,0	0/0:16:16,0	0/0:12:12,0	0/0:11:11,0	0/0:22:22,0	0/0:19:19,0	0/0:18:18,0	./.:0:.,.	0/0:10:10,0	0/0:12:12,0	0/0:14:14,0	./.:0:.,.
MockRefGenome	90280	.	G	T	.	PASS	AC=12;AF=0.060;DP=751;AV=17.03;NS=32	GT:DP:AD	0/0:11:11,0	0/0:51:51,0	0/0:23:23,0	./.:0:.,.	1/1:25:0,25	./.:0:.,.	0/0:10:10,0	./.:0:.,.	0/0:15:15,0	./.:0:.,.	0/0:21:21,0	0/0:14:14,0	./.:0:.,.	0/0:13:13,0	0/0:26:26,0	./.:0:.,.	./.:0:.,.	0/0:14:14,0	./.:0:.,.	./.:0:.,.	./.:0:.,.	0/0:10:10,0	0/0:26:26,0	./.:0:.,.	./.:0:.,.	0/0:18:18,0	./.:0:.,.	0/0:24:24,0	./.:0:.,.	1/1:25:0,25	0/0:16:16,0	0/0:12:12,0	0/1:12:7,5	0/1:22:14,8	1/1:19:0,19	1/1:18:0,18	0/0:12:12,0	./.:0:.,.	0/0:13:13,0	0/0:14:14,0	./.:0:.,.
MockRefGenome	90295	.	G	A	.	PASS	AC=7;AF=0.035;DP=765;AV=16.79;NS=34	GT:DP:AD	1/1:11:0,11	0/0:52:52,0	0/0:23:23,0	./.:0:.,.	0/0:25:25,0	./.:0:.,.	0/0:10:10,0	./.:0:.,.	0/0:15:15,0	./.:0:.,.	0/0:21:21,0	0/0:14:14,0	./.:0:.,.	0/0:13:13,0	0/0:26:26,0	./.:0:.,.	./.:0:.,.	0/0:14:14,0	./.:0:.,.	./.:0:.,.	./.:0:.,.	0/0:11:11,0	0/0:26:26,0	./.:0:.,.	./.:0:.,.	0/0:18:18,0	./.:0:.,.	0/0:24:24,0	./.:0:.,.	0/0:26:26,0	0/0:16:16,0	0/0:12:12,0	0/0:13:13,0	0/0:23:23,0	0/0:20:20,0	0/0:22:22,0	0/0:13:13,0	0/1:10:6,4	0/1:13:9,4	0/1:14:10,4	0/0:10:10,0
MockRefGenome	90310	.	C	G	.	PASS	AC=7;AF=0.035;DP=769;AV=16.82;NS=34	GT:DP:AD	1/1:11:0,11	0/0:52:52,0	0/0:23:23,0	./.:0:.,.	0/0:25:25,0	./.:0:.,.	0/0:10:10,0	./.:0:.,.	0/0:16:16,0	./.:0:.,.	0/0:21:21,0	0/0:14:14,0	./.:0:.,.	0/0:13:13,0	0/0:26:26,0	./.:0:.,.	./.:0:.,.	0/0:14:14,0	./.:0:.,.	./.:0:.,.	./.:0:.,.	0/0:11:11,0	0/0:26:26,0	./.:0:.,.	./.:0:.,.	0/0:18:18,0	./.:0:.,.	0/0:24:24,0	./.:0:.,.	0/0:26:26,0	0/0:16:16,0	0/0:12:12,0	0/0:13:13,0	0/0:23:23,0	0/0:20:20,0	0/0:22:22,0	0/0:13:13,0	0/1:10:6,4	0/1:13:9,4	0/1:14:10,4	0/0:10:10,0
MockRefGenome	90331	.	G	A	.	PASS	AC=5;AF=0.025;DP=785;AV=16.83;NS=36	GT:DP:AD	0/0:11:11,0	0/0:54:54,0	0/0:25:25,0	./.:0:.,.	0/0:25:25,0	./.:0:.,.	0/0:10:10,0	./.:0:.,.	0/0:16:16,0	./.:0:.,.	0/0:21:21,0	0/0:14:14,0	./.:0:.,.	0/0:13:13,0	0/0:27:27,0	./.:0:.,.	./.:0:.,.	0/0:14:14,0	./.:0:.,.	0/0:10:10,0	./.:0:.,.	0/0:11:11,0	0/1:26:14,12	./.:0:.,.	./.:0:.,.	1/1:19:0,19	./.:0:.,.	0/0:24:24,0	./.:0:.,.	0/0:26:26,0	0/0:16:16,0	0/0:12:12,0	0/0:13:13,0	0/0:24:24,0	0/0:20:20,0	0/0:23:23,0	0/0:13:13,0	0/0:10:10,0	0/0:13:13,0	0/0:14:14,0	0/0:10:10,0
MockRefGenome	90343	.	T	C	.	PASS	AC=12;AF=0.060;DP=786;AV=17.24;NS=33	GT:DP:AD	0/0:11:11,0	0/1:54:26,28	0/0:25:25,0	./.:0:.,.	0/0:25:25,0	./.:0:.,.	0/0:10:10,0	./.:0:.,.	0/0:16:16,0	./.:0:.,.	1/1:21:0,21	0/0:14:14,0	./.:0:.,.	1/1:13:0,13	0/0:27:27,0	./.:0:.,.	./.:0:.,.	1/1:14:0,14	./.:0:.,.	0/0:10:10,0	./.:0:.,.	0/0:11:11,0	0/0:26:26,0	./.:0:.,.	./.:0:.,.	0/0:19:19,0	./.:0:.,.	0/0:24:24,0	./.:0:.,.	0/0:26:26,0	0/0:16:16,0	0/0:12:12,0	0/0:13:13,0	0/0:24:24,0	0/0:20:20,0	0/0:23:23,0	./.:0:.,.	0/0:10:10,0	0/0:13:13,0	0/0:14:14,0	0/0:10:10,0
MockRefGenome	90346	.	G	A	.	PASS	AC=12;AF=0.060;DP=786;AV=17.24;NS=33	GT:DP:AD	0/0:11:11,0	0/1:54:26,28	0/0:25:25,0	./.:0:.,.	0/0:25:25,0	./.:0:.,.	0/0:10:10,0	./.:0:.,.	0/0:16:16,0	./.:0:.,.	1/1:21:0,21	0/0:14:14,0	./.:0:.,.	1/1:13:0,13	0/0:27:27,0	./.:0:.,.	./.:0:.,.	1/1:14:0,14	./.:0:.,.	0/0:10:10,0	./.:0:.,.	0/0:11:11,0	0/0:26:26,0	./.:0:.,.	./.:0:.,.	0/0:19:19,0	./.:0:.,.	0/0:24:24,0	./.:0:.,.	0/0:26:26,0	0/0:16:16,0	0/0:12:12,0	0/0:13:13,0	0/0:24:24,0	0/0:20:20,0	0/0:23:23,0	./.:0:.,.	0/0:10:10,0	0/0:13:13,0	0/0:14:14,0	0/0:10:10,0
MockRefGenome	90358	.	G	A	.	PASS	AC=12;AF=0.060;DP=786;AV=17.24;NS=33	GT:DP:AD	0/0:11:11,0	0/1:54:26,28	0/0:25:25,0	./.:0:.,.	0/0:25:25,0	./.:0:.,.	0/0:10:10,0	./.:0:.,.	0/0:16:16,0	./.:0:.,.	1/1:21:0,21	0/0:14:14,0	./.:0:.,.	1/1:13:0,13	0/0:27:27,0	./.:0:.,.	./.:0:.,.	1/1:14:0,14	./.:0:.,.	0/0:10:10,0	./.:0:.,.	0/0:11:11,0	0/0:26:26,0	./.:0:.,.	./.:0:.,.	0/0:19:19,0	./.:0:.,.	0/0:24:24,0	./.:0:.,.	0/0:26:26,0	0/0:16:16,0	0/0:12:12,0	0/0:13:13,0	0/0:24:24,0	0/0:20:20,0	0/0:23:23,0	./.:0:.,.	0/0:10:10,0	0/0:13:13,0	0/0:14:14,0	0/0:10:10,0
MockRefGenome	91442	.	T	A	.	PASS	AC=4;AF=0.020;DP=825;AV=14.06;NS=34	GT:DP:AD	0/0:11:11,0	0/0:17:17,0	0/0:15:15,0	0/0:27:27,0	0/1:14:4,10	0/0:14:14,0	./.:0:.,.	0/0:11:11,0	0/0:31:31,0	./.:0:.,.	0/0:13:13,0	0/0:14:14,0	0/0:10:10,0	0/0:15:15,0	./.:0:.,.	0/0:13:13,0	0/0:14:14,0	0/0:12:12,0	0/0:11:11,0	0/0:13:13,0	0/0:13:13,0	./.:0:.,.	0/0:12:12,0	0/0:10:10,0	./.:0:.,.	0/0:14:14,0	0/0:12:12,0	0/0:13:13,0	0/1:12:5,7	./.:0:.,.	0/0:17:17,0	1/1:10:0,10	./.:0:.,.	0/0:15:15,0	./.:0:.,.	./.:0:.,.	./.:0:.,.	./.:0:.,.	./.:0:.,.	./.:0:.,.	./.:0:.,.
MockRefGenome	91492	.	A	G	.	PASS	AC=4;AF=0.020;DP=811;AV=13.97;NS=33	GT:DP:AD	0/0:11:11,0	0/0:17:17,0	0/1:15:7,8	0/0:27:27,0	0/1:14:4,10	0/0:14:14,0	./.:0:.,.	0/0:11:11,0	0/0:31:31,0	./.:0:.,.	0/0:13:13,0	0/0:13:13,0	0/0:10:10,0	0/0:15:15,0	./.:0:.,.	0/0:13:13,0	0/0:13:13,0	0/0:12:12,0	0/0:11:11,0	0/0:13:13,0	0/0:12:12,0	./.:0:.,.	0/0:12:12,0	0/0:10:10,0	./.:0:.,.	0/0:14:14,0	0/0:11:11,0	0/0:13:13,0	0/1:11:5,6	./.:0:.,.	0/0:17:17,0	./.:0:.,.	./.:0:.,.	0/0:15:15,0	./.:0:.,.	./.:0:.,.	./.:0:.,.	./.:0:.,.	./.:0:.,.	./.:0:.,.	./.:0:.,.
MockRefGenome	91493	.	A	G	.	PASS	AC=4;AF=0.020;DP=811;AV=13.97;NS=33	GT:DP:AD	0/0:11:11,0	0/0:17:17,0	0/1:15:7,8	0/0:27:27,0	0/1:14:4,10	0/0:14:14,0	./.:0:.,.	0/0:11:11,0	0/0:31:31,0	./.:0:.,.	0/0:13:13,0	0/0:13:13,0	0/0:10:10,0	0/0:15:15,0	./.:0:.,.	0/0:13:13,0	0/0:13:13,0	0/0:12:12,0	0/0:11:11,0	0/0:13:13,0	0/0:12:12,0	./.:0:.,.	0/0:12:12,0	0/0:10:10,0	./.:0:.,.	0/0:14:14,0	0/0:11:11,0	0/0:13:13,0	0/1:11:5,6	./.:0:.,.	0/0:17:17,0	./.:0:.,.	./.:0:.,.	0/0:15:15,0	./.:0:.,.	./.:0:.,.	./.:0:.,.	./.:0:.,.	./.:0:.,.	./.:0:.,.	./.:0:.,.
MockRefGenome	91559	.	T	C	.	PASS	AC=6;AF=0.030;DP=818;AV=14.09;NS=33	GT:DP:AD	0/0:11:11,0	0/0:15:15,0	0/0:15:15,0	0/0:28:28,0	1/1:14:0,14	0/0:14:14,0	./.:0:.,.	0/0:11:11,0	0/0:31:31,0	./.:0:.,.	0/0:13:13,0	0/0:14:14,0	./.:0:.,.	0/0:16:16,0	./.:0:.,.	0/0:13:13,0	0/0:13:13,0	0/0:12:12,0	0/0:10:10,0	0/0:13:13,0	0/0:14:14,0	./.:0:.,.	0/0:12:12,0	0/0:10:10,0	./.:0:.,.	0/0:14:14,0	0/0:12:12,0	0/0:12:12,0	1/1:12:0,12	./.:0:.,.	0/0:17:17,0	1/1:10:0,10	./.:0:.,.	0/0:15:15,0	./.:0:.,.	./.:0:.,.	./.:0:.,.	./.:0:.,.	./.:0:.,.	./.:0:.,.	./.:0:.,.
MockRefGenome	91574	.	A	G	.	PASS	AC=9;AF=0.045;DP=825;AV=13.75;NS=36	GT:DP:AD	0/0:11:11,0	0/0:17:17,0	0/1:15:8,7	0/0:28:28,0	0/0:14:14,0	0/1:14:5,9	./.:0:.,.	0/0:11:11,0	0/0:31:31,0	./.:0:.,.	0/0:13:13,0	0/1:14:6,8	0/0:10:10,0	0/0:16:16,0	0/1:8:3,5	0/0:13:13,0	0/0:13:13,0	0/0:12:12,0	0/0:10:10,0	1/1:13:0,13	0/0:14:14,0	./.:0:.,.	0/0:12:12,0	0/0:10:10,0	./.:0:.,.	0/0:14:14,0	0/0:12:12,0	0/0:12:12,0	0/0:12:12,0	./.:0:.,.	0/0:17:17,0	0/0:10:10,0	./.:0:.,.	0/0:15:15,0	./.:0:.,.	./.:0:.,.	./.:0:.,.	./.:0:.,.	./.:0:.,.	./.:0:.,.	./.:0:.,.
MockRefGenome	91622	.	G	C	.	PASS	AC=26;AF=0.130;DP=830;AV=13.68;NS=37	GT:DP:AD	0/0:11:11,0	0/0:17:17,0	1/1:15:0,15	0/0:28:28,0	0/0:14:14,0	1/1:14:0,14	./.:0:.,.	0/0:11:11,0	0/0:31:31,0	./.:0:.,.	0/0:13:13,0	0/1:14:6,8	0/0:10:10,0	0/0:16:16,0	./.:0:.,.	0/0:13:13,0	0/0:14:14,0	0/0:12:12,0	1/1:11:0,11	1/1:13:0,13	0/0:14:14,0	./.:0:.,.	1/1:12:0,12	1/1:10:0,10	./.:0:.,.	0/1:14:11,3	0/1:12:8,4	0/1:13:8,5	0/0:12:12,0	./.:0:.,.	1/1:17:0,17	0/0:10:10,0	./.:0:.,.	1/1:15:0,15	./.:0:.,.	./.:0:.,.	./.:0:.,.	./.:0:.,.	./.:0:.,.	./.:0:.,.	./.:0:.,.
MockRefGenome	92090	.	G	A	.	PASS	AC=21;AF=0.105;DP=2619;AV=36.50;NS=66	GT:DP:AD	./.:0:.,.	0/1:242:63,179	0/0:37:37,0	./.:0:.,.	0/0:87:87,0	0/0:42:42,0	0/0:17:17,0	0/1:22:6,16	0/0:49:49,0	0/1:33:10,23	0/1:54:27,27	0/0:29:29,0	0/1:63:13,50	./.:0:.,.	0/0:80:80,0	0/1:55:16,39	0/1:40:16,24	0/1:45:21,24	0/0:20:20,0	0/0:28:28,0	0/0:46:46,0	0/0:23:23,0	0/0:39:39,0	0/0:16:16,0	0/0:16:16,0	0/0:19:19,0	0/0:33:33,0	0/0:20:20,0	0/0:90:90,0	0/1:42:27,15	0/0:46:46,0	0/0:77:77,0	0/0:17:17,0	0/0:46:46,0	0/0:102:102,0	0/0:36:36,0	1/1:43:0,43	0/0:18:18,0	0/0:11:11,0	./.:0:.,.	./.:0:.,.
MockRefGenome	92308	.	A	G	.	PASS	AC=8;AF=0.040;DP=2602;AV=38.00;NS=60	GT:DP:AD	./.:0:.,.	0/0:207:207,0	0/0:37:37,0	./.:0:.,.	0/0:86:85,1	0/0:42:42,0	0/0:17:17,0	0/0:24:24,0	0/0:49:49,0	0/0:32:32,0	0/0:53:53,0	0/0:29:29,0	0/0:64:64,0	0/0:46:46,0	0/0:80:80,0	0/0:51:51,0	0/0:56:56,0	0/0:51:51,0	0/0:20:20,0	0/0:28:28,0	0/0:46:46,0	0/0:23:23,0	0/0:39:39,0	./.:0:.,.	0/0:16:16,0	0/0:19:19,0	./.:0:.,.	0/0:21:21,0	0/0:90:90,0	0/0:41:40,1	0/0:47:47,0	0/0:76:76,0	0/0:18:18,0	0/0:49:48,1	0/0:100:100,0	0/0:36:36,0	0/0:41:41,0	0/1:18:6,12	0/1:11:6,5	./.:0:.,.	./.:0:.,.
MockRefGenome	92335	.	A	G	.	PASS	AC=10;AF=0.050;DP=2658;AV=39.28;NS=61	GT:DP:AD	./.:0:.,.	0/0:243:243,0	0/0:37:37,0	./.:0:.,.	0/0:86:85,1	0/0:42:42,0	0/0:17:17,0	0/0:24:24,0	0/0:49:49,0	0/0:34:34,0	0/0:54:54,0	0/0:29:29,0	0/0:64:64,0	0/0:46:46,0	0/0:80:80,0	0/0:55:55,0	0/0:56:56,0	0/0:53:53,0	0/0:20:20,0	0/0:28:28,0	0/0:46:46,0	0/0:23:23,0	0/0:39:39,0	./.:0:.,.	0/0:16:16,0	0/0:19:19,0	./.:0:.,.	0/0:21:21,0	0/0:92:92,0	0/0:42:41,1	0/0:47:47,0	0/0:77:77,0	0/0:19:19,0	0/0:49:49,0	0/0:102:102,0	0/0:36:36,0	0/0:43:43,0	0/1:18:5,13	0/1:11:6,5	./.:0:.,.	./.:0:.,.
MockRefGenome	92336	.	T	C	.	PASS	AC=45;AF=0.225;DP=2661;AV=38.35;NS=60	GT:DP:AD	./.:0:.,.	0/0:243:243,0	1/1:37:0,37	./.:0:.,.	0/0:86:86,0	1/1:42:0,42	./.:0:.,.	0/0:24:23,1	./.:0:.,.	0/0:34:34,0	0/0:54:54,0	1/1:29:0,29	0/0:64:63,1	0/0:46:46,0	1/1:80:1,79	0/0:55:55,0	0/0:56:56,0	0/0:53:53,0	1/1:20:0,20	1/1:28:0,28	1/1:46:0,46	1/1:23:1,22	1/1:39:0,39	./.:0:.,.	1/1:16:0,16	1/1:19:0,19	./.:0:.,.	1/1:21:0,21	0/0:92:91,1	0/0:42:42,0	1/1:47:1,46	0/0:77:77,0	./.:0:.,.	0/0:49:49,0	0/0:102:102,0	0/0:36:36,0	0/0:43:43,0	0/1:18:14,4	0/1:11:5,6	./.:0:.,.	./.:0:.,.
MockRefGenome	92341	.	G	A	.	PASS	AC=12;AF=0.060;DP=2661;AV=36.70;NS=66	GT:DP:AD	./.:0:.,.	0/0:243:242,1	0/0:37:37,0	./.:0:.,.	0/1:86:48,38	0/0:42:41,1	0/0:17:17,0	0/1:24:20,4	0/0:49:48,1	0/0:34:34,0	0/0:54:54,0	0/0:29:29,0	./.:0:.,.	0/0:46:46,0	0/0:80:79,1	0/0:55:55,0	0/0:56:56,0	0/0:53:53,0	0/0:20:20,0	0/0:28:28,0	0/0:46:46,0	0/0:23:23,0	0/0:39:39,0	0/0:16:16,0	0/0:16:16,0	0/0:19:19,0	0/0:33:33,0	0/0:21:21,0	0/1:92:59,33	0/1:42:23,19	0/0:47:46,1	0/1:77:8,69	0/0:19:19,0	0/0:49:49,0	0/1:102:57,45	0/1:36:28,8	0/0:43:43,0	0/0:18:18,0	0/0:11:11,0	./.:0:.,.	./.:0:.,.
MockRefGenome	92751	.	G	A	.	PASS	AC=10;AF=0.050;DP=1223;AV=17.05;NS=59	GT:DP:AD	0/0:17:17,0	0/0:38:38,0	0/0:29:29,0	0/0:38:38,0	1/1:19:0,19	0/0:24:24,0	0/0:16:16,0	./.:0:.,.	0/0:55:55,0	./.:0:.,.	0/0:11:11,0	0/0:15:15,0	./.:0:.,.	0/0:14:14,0	0/0:20:20,0	./.:0:.,.	./.:0:.,.	./.:0:.,.	0/0:12:12,0	0/0:19:19,0	0/0:17:17,0	0/0:12:12,0	./.:0:.,.	0/0:16:16,0	0/0:16:16,0	0/0:15:15,0	0/0:21:21,0	0/0:35:35,0	1/1:30:0,30	0/1:16:5,11	0/0:14:14,0	0/1:16:5,11	0/0:19:19,0	0/0:16:16,0	0/0:29:29,0	1/1:17:0,17	0/0:10:10,0	0/0:12:12,0	0/0:10:10,0	0/0:22:22,0	0/0:11:11,0
MockRefGenome	92783	.	G	T	.	PASS	AC=6;AF=0.030;DP=1188;AV=17.02;NS=56	GT:DP:AD	0/1:17:10,7	0/0:35:35,0	0/0:29:29,0	1/1:37:0,37	0/0:19:19,0	0/0:24:24,0	0/0:16:16,0	./.:0:.,.	0/0:54:54,0	./.:0:.,.	0/0:11:11,0	0/0:14:14,0	./.:0:.,.	0/0:10:10,0	0/0:20:20,0	./.:0:.,.	./.:0:.,.	./.:0:.,.	0/0:12:12,0	0/0:19:19,0	0/0:17:17,0	0/0:12:12,0	./.:0:.,.	0/0:16:16,0	0/0:15:15,0	0/0:15:15,0	0/0:21:21,0	0/0:34:34,0	0/0:28:28,0	0/0:15:15,0	0/0:13:13,0	0/0:16:16,0	0/0:19:19,0	0/0:16:16,0	0/0:27:27,0	0/0:17:17,0	./.:0:.,.	0/0:12:12,0	./.:0:.,.	0/0:22:22,0	0/0:11:11,0
MockRefGenome	92880	.	G	C	.	PASS	AC=51;AF=0.255;DP=1024;AV=16.62;NS=45	GT:DP:AD	0/0:16:0,16	./.:0:.,.	1/1:28:28,0	0/0:35:0,35	0/0:17:0,17	1/1:22:22,0	1/1:15:15,0	./.:0:.,.	1/1:52:52,0	./.:0:.,.	1/1:11:11,0	1/1:13:13,0	./.:0:.,.	./.:0:.,.	./.:0:.,.	./.:0:.,.	./.:0:.,.	./.:0:.,.	1/1:10:10,0	1/1:17:17,0	1/1:15:15,0	1/1:10:10,0	./.:0:.,.	1/1:16:16,0	1/1:14:14,0	1/1:13:13,0	1/1:18:18,0	1/1:31:31,0	0/0:31:0,31	1/0:11:4,7	1/1:13:13,0	0/0:15:0,15	1/1:14:14,0	1/0:16:10,6	1/0:29:17,12	0/0:17:0,17	./.:0:.,.	./.:0:.,.	1/0:9:6,3	1/0:16:11,5	./.:0:.,.
MockRefGenome	92929	.	G	A	.	PASS	AC=8;AF=0.040;DP=1090;AV=17.33;NS=49	GT:DP:AD	0/0:16:16,0	./.:0:.,.	0/0:28:28,0	0/0:38:37,1	1/1:17:0,17	0/0:24:24,0	0/0:15:15,0	./.:0:.,.	0/0:54:54,0	./.:0:.,.	0/0:11:11,0	0/0:15:15,0	./.:0:.,.	./.:0:.,.	0/0:20:20,0	./.:0:.,.	./.:0:.,.	./.:0:.,.	0/0:12:12,0	0/0:18:18,0	0/0:15:15,0	0/0:12:12,0	./.:0:.,.	0/0:17:17,0	0/0:14:14,0	0/0:15:15,0	0/0:20:20,0	0/0:33:33,0	0/1:31:19,12	0/1:12:4,8	0/0:14:14,0	0/1:16:5,11	0/0:18:18,0	0/0:16:16,0	0/0:29:29,0	1/1:17:0,17	./.:0:.,.	0/0:11:11,0	./.:0:.,.	0/0:21:21,0	0/0:11:11,0
MockRefGenome	92939	.	C	G	.	PASS	AC=6;AF=0.030;DP=1104;AV=16.91;NS=53	GT:DP:AD	0/1:17:10,7	./.:0:.,.	0/0:28:28,0	1/1:38:0,38	0/0:17:17,0	0/0:24:24,0	0/0:16:16,0	./.:0:.,.	0/0:55:55,0	./.:0:.,.	0/0:11:11,0	0/0:15:15,0	./.:0:.,.	./.:0:.,.	0/0:20:20,0	./.:0:.,.	./.:0:.,.	./.:0:.,.	0/0:12:12,0	0/0:18:18,0	0/0:15:15,0	0/0:12:12,0	./.:0:.,.	0/0:17:17,0	0/0:14:14,0	0/0:15:15,0	0/0:21:21,0	0/0:34:34,0	0/0:31:31,0	0/0:13:13,0	0/0:14:14,0	0/0:16:16,0	0/0:18:18,0	0/0:16:16,0	0/0:29:29,0	0/0:17:17,0	./.:0:.,.	0/0:11:11,0	./.:0:.,.	0/0:21:21,0	0/0:11:11,0
MockRefGenome	92943	.	T	C	.	PASS	AC=10;AF=0.050;DP=1108;AV=17.28;NS=50	GT:DP:AD	0/0:17:17,0	./.:0:.,.	0/0:28:28,0	0/0:38:38,0	0/0:17:17,0	0/0:24:24,0	0/1:16:7,9	./.:0:.,.	0/0:55:55,0	./.:0:.,.	0/0:11:11,0	0/0:15:15,0	./.:0:.,.	./.:0:.,.	0/0:20:20,0	./.:0:.,.	./.:0:.,.	./.:0:.,.	0/0:12:12,0	0/0:18:18,0	0/0:15:15,0	0/0:12:12,0	./.:0:.,.	0/0:17:17,0	0/1:14:7,7	0/0:15:15,0	1/1:21:0,21	0/0:34:34,0	0/0:31:31,0	0/1:13:9,4	0/1:14:7,7	0/0:16:16,0	0/0:18:18,0	0/0:16:16,0	0/1:29:12,17	0/0:17:17,0	./.:0:.,.	0/0:11:11,0	./.:0:.,.	0/0:21:21,0	./.:0:.,.
MockRefGenome	92968	.	A	G	.	PASS	AC=13;AF=0.065;DP=1147;AV=17.05;NS=55	GT:DP:AD	0/0:17:17,0	./.:0:.,.	0/0:30:30,0	0/0:38:38,0	0/0:19:19,0	0/0:24:24,0	0/0:16:16,0	./.:0:.,.	0/0:56:56,0	./.:0:.,.	0/0:11:11,0	0/0:15:15,0	./.:0:.,.	./.:0:.,.	0/0:20:20,0	./.:0:.,.	./.:0:.,.	./.:0:.,.	0/0:12:12,0	0/0:18:18,0	0/0:18:18,0	0/0:12:12,0	./.:0:.,.	0/0:18:18,0	0/0:15:15,0	0/0:15:15,0	0/0:21:21,0	0/0:34:34,0	0/0:31:31,0	0/0:14:14,0	0/0:15:15,0	0/0:16:16,0	0/0:19:19,0	0/0:16:16,0	0/0:29:29,0	0/0:17:17,0	./.:0:.,.	0/1:13:3,10	0/1:9:6,3	0/1:22:15,7	0/1:12:3,9
MockRefGenome	92973	.	G	C	.	PASS	AC=81;AF=0.405;DP=1154;AV=17.46;NS=52	GT:DP:AD	1/0:17:10,7	./.:0:.,.	1/1:30:30,0	0/0:38:0,38	1/1:19:19,0	1/1:24:24,0	1/0:16:7,9	./.:0:.,.	1/1:57:57,0	./.:0:.,.	0/0:11:0,11	1/1:15:15,0	./.:0:.,.	./.:0:.,.	1/1:20:20,0	./.:0:.,.	./.:0:.,.	./.:0:.,.	1/1:12:12,0	1/1:19:19,0	1/1:18:18,0	1/1:12:12,0	./.:0:.,.	1/1:18:18,0	1/0:15:7,8	1/1:15:15,0	0/0:21:0,21	1/0:35:24,11	1/1:31:31,0	1/0:15:10,5	1/0:15:7,8	1/1:16:16,0	1/1:19:19,0	1/0:16:10,6	1/0:29:12,17	1/1:17:17,0	./.:0:.,.	1/1:13:13,0	./.:0:.,.	1/1:22:22,0	1/0:12:9,3
MockRefGenome	93167	.	T	C	.	PASS	AC=12;AF=0.060;DP=1078;AV=16.22;NS=45	GT:DP:AD	1/1:12:0,12	0/0:54:54,0	0/0:18:18,0	0/0:30:30,0	./.:0:.,.	0/0:16:16,0	0/0:18:18,0	0/0:13:13,0	0/0:39:39,0	./.:0:.,.	0/0:14:14,0	0/0:15:15,0	0/0:13:13,0	0/0:14:14,0	0/0:19:19,0	./.:0:.,.	0/0:18:18,0	0/0:19:19,0	./.:0:.,.	0/0:15:15,0	./.:0:.,.	./.:0:.,.	0/0:15:15,0	0/0:11:11,0	./.:0:.,.	./.:0:.,.	./.:0:.,.	0/0:26:26,0	0/0:13:13,0	0/0:20:20,0	0/0:21:21,0	0/0:13:13,0	0/0:14:14,0	0/0:17:17,0	0/0:11:11,0	0/0:11:11,0	./.:0:.,.	0/1:9:3,6	0/1:8:5,3	0/1:16:13,3	./.:0:.,.
MockRefGenome	93305	.	C	G	.	PASS	AC=9;AF=0.045;DP=1122;AV=15.98;NS=49	GT:DP:AD	0/0:13:13,0	0/1:57:31,26	0/0:18:18,0	0/0:30:30,0	./.:0:.,.	0/0:16:16,0	0/0:18:18,0	0/1:13:8,5	0/0:39:39,0	./.:0:.,.	0/1:15:10,5	0/0:15:15,0	./.:0:.,.	0/1:15:9,6	0/0:20:20,0	0/1:6:3,3	0/1:19:10,9	0/1:19:14,5	./.:0:.,.	0/0:14:14,0	./.:0:.,.	./.:0:.,.	0/0:15:15,0	0/0:11:11,0	./.:0:.,.	./.:0:.,.	./.:0:.,.	0/0:26:26,0	0/0:13:13,0	0/0:20:20,0	0/0:23:23,0	0/0:13:13,0	0/0:14:14,0	0/0:17:17,0	0/0:12:12,0	0/0:11:11,0	0/1:9:4,5	./.:0:.,.	./.:0:.,.	0/0:16:16,0	./.:0:.,.
MockRefGenome	93392	.	G	A	.	PASS	AC=10;AF=0.050;DP=502;AV=14.92;NS=24	GT:DP:AD	0/0:19:19,0	./.:0:.,.	./.:0:.,.	0/0:45:45,0	./.:0:.,.	./.:0:.,.	0/0:12:12,0	./.:0:.,.	./.:0:.,.	./.:0:.,.	./.:0:.,.	./.:0:.,.	./.:0:.,.	./.:0:.,.	./.:0:.,.	./.:0:.,.	./.:0:.,.	./.:0:.,.	./.:0:.,.	./.:0:.,.	./.:0:.,.	./.:0:.,.	./.:0:.,.	./.:0:.,.	1/1:15:0,15	./.:0:.,.	1/1:10:0,10	./.:0:.,.	./.:0:.,.	1/1:13:0,13	./.:0:.,.	1/1:10:0,10	./.:0:.,.	./.:0:.,.	./.:0:.,.	./.:0:.,.	./.:0:.,.	./.:0:.,.	./.:0:.,.	./.:0:.,.	./.:0:.,.
MockRefGenome	93489	.	G	T	.	PASS	AC=8;AF=0.040;DP=487;AV=15.05;NS=21	GT:DP:AD	0/0:18:18,0	./.:0:.,.	./.:0:.,.	0/0:44:44,0	./.:0:.,.	./.:0:.,.	./.:0:.,.	./.:0:.,.	./.:0:.,.	./.:0:.,.	./.:0:.,.	./.:0:.,.	./.:0:.,.	./.:0:.,.	./.:0:.,.	./.:0:.,.	./.:0:.,.	./.:0:.,.	./.:0:.,.	./.:0:.,.	./.:0:.,.	./.:0:.,.	./.:0:.,.	./.:0:.,.	1/1:15:0,15	./.:0:.,.	./.:0:.,.	./.:0:.,.	./.:0:.,.	1/1:12:0,12	./.:0:.,.	1/1:10:0,10	./.:0:.,.	./.:0:.,.	./.:0:.,.	./.:0:.,.	./.:0:.,.	./.:0:.,.	./.:0:.,.	./.:0:.,.	./.:0:.,.
MockRefGenome	93702	.	C	T	.	PASS	AC=8;AF=0.040;DP=2239;AV=36.19;NS=53	GT:DP:AD	./.:0:.,.	./.:0:.,.	0/0:38:38,0	./.:0:.,.	1/1:26:0,26	0/0:73:73,0	0/0:55:55,0	0/0:36:36,0	0/0:64:64,0	0/0:37:37,0	0/0:38:38,0	0/0:69:69,0	0/0:80:80,0	0/0:78:78,0	0/0:20:20,0	./.:0:.,.	0/0:67:67,0	0/0:105:104,1	0/0:19:19,0	0/0:10:10,0	0/0:61:61,0	0/0:60:60,0	./.:0:.,.	0/0:16:16,0	0/0:59:59,0	0/0:42:42,0	0/0:53:53,0	0/0:71:71,0	./.:0:.,.	1/1:11:0,11	0/0:48:48,0	0/1:15:8,7	0/0:34:34,0	0/0:49:48,1	./.:0:.,.	1/1:10:0,10	0/0:53:53,0	./.:0:.,.	./.:0:.,.	./.:0:.,.	0/0:11:11,0
MockRefGenome	93733	.	C	T	.	PASS	AC=8;AF=0.040;DP=2235;AV=33.92;NS=51	GT:DP:AD	./.:0:.,.	./.:0:.,.	0/0:38:38,0	./.:0:.,.	1/1:26:0,26	0/0:73:73,0	0/0:55:55,0	0/0:37:37,0	0/0:63:63,0	0/0:37:37,0	0/0:38:38,0	0/0:69:68,1	0/0:80:80,0	0/0:78:78,0	0/0:20:20,0	./.:0:.,.	./.:0:.,.	./.:0:.,.	0/0:19:19,0	0/0:10:10,0	0/0:61:61,0	0/0:60:60,0	0/0:15:15,0	0/0:16:16,0	0/0:59:59,0	0/0:42:42,0	0/0:53:53,0	0/0:71:71,0	./.:0:.,.	1/1:11:0,11	0/0:48:48,0	0/1:15:8,7	0/0:34:34,0	0/0:49:49,0	./.:0:.,.	1/1:10:0,10	0/0:53:53,0	./.:0:.,.	./.:0:.,.	./.:0:.,.	0/0:11:11,0
MockRefGenome	93766	.	T	G	.	PASS	AC=56;AF=0.280;DP=2188;AV=39.09;NS=53	GT:DP:AD	./.:0:.,.	0/0:209:208,1	1/1:38:0,38	./.:0:.,.	0/0:25:25,0	1/1:73:1,72	0/1:54:6,48	0/0:37:37,0	1/1:61:0,61	0/0:37:37,0	0/0:38:38,0	1/1:68:1,67	0/0:76:76,0	0/0:77:77,0	1/1:19:0,19	./.:0:.,.	0/0:63:63,0	0/0:103:103,0	1/1:19:0,19	1/1:10:0,10	1/1:59:0,59	1/1:60:1,59	1/1:15:0,15	1/1:16:0,16	0/1:58:16,42	1/1:39:0,39	1/1:52:0,52	1/1:70:0,70	./.:0:.,.	0/0:11:11,0	1/1:45:0,45	0/0:14:14,0	0/1:32:28,4	0/0:49:49,0	./.:0:.,.	./.:0:.,.	0/0:52:52,0	./.:0:.,.	./.:0:.,.	./.:0:.,.	1/1:10:0,10
MockRefGenome	93778	.	A	C	.	PASS	AC=34;AF=0.170;DP=2157;AV=33.54;NS=52	GT:DP:AD	./.:0:.,.	./.:0:.,.	0/0:38:38,0	./.:0:.,.	0/0:21:21,0	0/0:72:71,1	0/0:53:53,0	1/1:37:0,37	0/0:61:61,0	1/1:37:0,37	1/1:38:0,38	0/0:66:66,0	./.:0:.,.	1/1:76:0,76	0/0:19:19,0	./.:0:.,.	1/1:61:0,61	1/1:102:0,102	0/0:18:18,0	0/0:10:10,0	0/0:58:58,0	0/0:60:60,0	0/0:15:15,0	0/0:16:16,0	0/0:58:58,0	0/0:39:39,0	0/0:51:51,0	0/0:70:70,0	./.:0:.,.	0/0:11:11,0	0/0:44:44,0	0/0:14:14,0	0/1:32:28,4	./.:0:.,.	0/0:19:19,0	./.:0:.,.	1/1:52:0,52	./.:0:.,.	./.:0:.,.	./.:0:.,.	0/0:10:10,0
MockRefGenome	93822	.	G	T	.	PASS	AC=39;AF=0.195;DP=2109;AV=36.69;NS=54	GT:DP:AD	./.:0:.,.	1/1:208:1,207	0/0:38:38,0	./.:0:.,.	0/0:20:20,0	0/0:72:71,1	0/0:53:53,0	1/1:36:0,36	0/0:60:60,0	1/1:37:0,37	1/1:37:0,37	0/0:64:64,0	1/1:71:0,71	1/1:73:0,73	0/0:18:18,0	./.:0:.,.	1/1:56:0,56	1/1:97:0,97	0/0:18:18,0	0/0:10:10,0	0/0:57:57,0	0/0:60:59,1	0/0:15:15,0	0/0:16:16,0	0/0:57:57,0	0/0:39:39,0	0/0:51:51,0	0/0:70:70,0	./.:0:.,.	0/0:11:11,0	0/0:42:42,0	0/0:14:14,0	0/1:32:28,4	./.:0:.,.	0/0:18:18,0	./.:0:.,.	1/1:48:0,48	./.:0:.,.	./.:0:.,.	./.:0:.,.	0/0:10:10,0
MockRefGenome	93829	.	G	A	.	PASS	AC=13;AF=0.065;DP=2071;AV=36.42;NS=53	GT:DP:AD	./.:0:.,.	0/0:208:208,0	0/0:38:38,0	./.:0:.,.	0/0:20:20,0	0/1:72:45,27	0/0:53:53,0	0/0:36:36,0	0/1:60:53,7	0/0:37:37,0	0/0:37:37,0	0/1:64:33,31	0/0:67:67,0	0/0:71:71,0	0/1:15:9,6	./.:0:.,.	0/0:56:56,0	0/0:94:94,0	0/0:18:18,0	0/1:10:7,3	./.:0:.,.	0/1:59:34,25	0/1:15:7,8	0/0:16:16,0	0/0:55:55,0	0/1:38:17,21	0/0:50:50,0	0/0:70:70,0	./.:0:.,.	0/0:11:11,0	0/0:41:41,0	0/0:14:14,0	0/0:32:32,0	0/0:48:48,0	0/0:17:17,0	./.:0:.,.	0/0:48:48,0	./.:0:.,.	./.:0:.,.	./.:0:.,.	0/0:10:10,0
MockRefGenome	94387	.	C	T	.	PASS	AC=21;AF=0.105;DP=634;AV=15.84;NS=25	GT:DP:AD	1/1:32:0,32	./.:0:.,.	./.:0:.,.	0/1:45:37,8	0/0:12:12,0	./.:0:.,.	./.:0:.,.	./.:0:.,.	./.:0:.,.	./.:0:.,.	./.:0:.,.	./.:0:.,.	./.:0:.,.	./.:0:.,.	0/0:13:13,0	./.:0:.,.	./.:0:.,.	./.:0:.,.	./.:0:.,.	./.:0:.,.	./.:0:.,.	./.:0:.,.	0/0:11:11,0	./.:0:.,.	./.:0:.,.	./.:0:.,.	./.:0:.,.	./.:0:.,.	0/0:23:23,0	0/0:13:13,0	./.:0:.,.	./.:0:.,.	./.:0:.,.	./.:0:.,.	0/0:18:18,0	./.:0:.,.	./.:0:.,.	./.:0:.,.	0/1:15:7,8	./.:0:.,.	./.:0:.,.
MockRefGenome	94396	.	G	A	.	PASS	AC=21;AF=0.105;DP=633;AV=15.80;NS=25	GT:DP:AD	1/1:32:0,32	./.:0:.,.	./.:0:.,.	0/1:45:37,8	0/0:12:12,0	./.:0:.,.	./.:0:.,.	./.:0:.,.	./.:0:.,.	./.:0:.,.	./.:0:.,.	./.:0:.,.	./.:0:.,.	./.:0:.,.	0/0:13:13,0	./.:0:.,.	./.:0:.,.	./.:0:.,.	./.:0:.,.	./.:0:.,.	./.:0:.,.	./.:0:.,.	0/0:11:11,0	./.:0:.,.	./.:0:.,.	./.:0:.,.	./.:0:.,.	./.:0:.,.	0/0:23:23,0	0/0:12:12,0	./.:0:.,.	./.:0:.,.	./.:0:.,.	./.:0:.,.	0/0:18:18,0	./.:0:.,.	./.:0:.,.	./.:0:.,.	0/1:15:7,8	./.:0:.,.	./.:0:.,.
MockRefGenome	94459	.	T	C	.	PASS	AC=19;AF=0.095;DP=621;AV=15.54;NS=26	GT:DP:AD	0/0:32:32,0	./.:0:.,.	./.:0:.,.	0/1:45:8,37	1/1:12:0,12	./.:0:.,.	./.:0:.,.	./.:0:.,.	./.:0:.,.	./.:0:.,.	./.:0:.,.	./.:0:.,.	./.:0:.,.	./.:0:.,.	0/0:13:13,0	./.:0:.,.	./.:0:.,.	./.:0:.,.	./.:0:.,.	./.:0:.,.	./.:0:.,.	./.:0:.,.	0/0:10:10,0	./.:0:.,.	./.:0:.,.	./.:0:.,.	./.:0:.,.	./.:0:.,.	0/1:22:8,14	1/1:12:0,12	./.:0:.,.	./.:0:.,.	./.:0:.,.	./.:0:.,.	0/0:16:16,0	./.:0:.,.	./.:0:.,.	./.:0:.,.	0/1:15:8,7	./.:0:.,.	./.:0:.,.
MockRefGenome	94526	.	C	T	.	PASS	AC=28;AF=0.140;DP=786;AV=19.00;NS=30	GT:DP:AD	1/1:48:48,0	./.:0:.,.	./.:0:.,.	1/0:118:81,37	0/0:11:0,11	./.:0:.,.	./.:0:.,.	./.:0:.,.	./.:0:.,.	./.:0:.,.	./.:0:.,.	./.:0:.,.	./.:0:.,.	./.:0:.,.	0/0:13:0,13	./.:0:.,.	./.:0:.,.	./.:0:.,.	./.:0:.,.	./.:0:.,.	./.:0:.,.	./.:0:.,.	0/0:11:0,11	./.:0:.,.	./.:0:.,.	./.:0:.,.	./.:0:.,.	./.:0:.,.	0/0:16:0,16	0/0:12:0,12	./.:0:.,.	./.:0:.,.	./.:0:.,.	./.:0:.,.	0/0:17:0,17	./.:0:.,.	./.:0:.,.	./.:0:.,.	1/0:15:8,7	1/1:12:12,0	./.:0:.,.
MockRefGenome	94553	.	G	A	.	PASS	AC=4;AF=0.020;DP=808;AV=19.48;NS=31	GT:DP:AD	0/0:50:50,0	./.:0:.,.	./.:0:.,.	0/0:120:120,0	0/0:12:12,0	./.:0:.,.	./.:0:.,.	./.:0:.,.	./.:0:.,.	./.:0:.,.	./.:0:.,.	./.:0:.,.	./.:0:.,.	./.:0:.,.	0/0:13:13,0	./.:0:.,.	./.:0:.,.	./.:0:.,.	./.:0:.,.	./.:0:.,.	./.:0:.,.	./.:0:.,.	0/0:11:11,0	./.:0:.,.	./.:0:.,.	./.:0:.,.	./.:0:.,.	./.:0:.,.	0/0:17:17,0	0/0:13:13,0	./.:0:.,.	./.:0:.,.	./.:0:.,.	./.:0:.,.	0/0:17:17,0	./.:0:.,.	./.:0:.,.	./.:0:.,.	0/0:15:15,0	0/0:13:13,0	./.:0:.,.
MockRefGenome	94601	.	G	T	.	PASS	AC=31;AF=0.155;DP=828;AV=19.06;NS=33	GT:DP:AD	1/1:51:51,0	./.:0:.,.	./.:0:.,.	1/0:120:83,37	0/0:12:0,12	./.:0:.,.	./.:0:.,.	./.:0:.,.	./.:0:.,.	./.:0:.,.	./.:0:.,.	./.:0:.,.	./.:0:.,.	./.:0:.,.	0/0:13:0,13	./.:0:.,.	./.:0:.,.	./.:0:.,.	./.:0:.,.	./.:0:.,.	./.:0:.,.	./.:0:.,.	0/0:11:0,11	./.:0:.,.	./.:0:.,.	./.:0:.,.	./.:0:.,.	./.:0:.,.	0/0:19:0,19	0/0:13:0,13	./.:0:.,.	./.:0:.,.	./.:0:.,.	./.:0:.,.	0/0:18:0,18	./.:0:.,.	./.:0:.,.	./.:0:.,.	1/0:15:8,7	1/1:13:13,0	./.:0:.,.
MockRefGenome	94613	.	A	G	.	PASS	AC=25;AF=0.125;DP=833;AV=18.82;NS=34	GT:DP:AD	0/0:51:51,0	./.:0:.,.	./.:0:.,.	0/1:120:83,37	0/0:12:12,0	./.:0:.,.	./.:0:.,.	./.:0:.,.	./.:0:.,.	./.:0:.,.	./.:0:.,.	./.:0:.,.	./.:0:.,.	./.:0:.,.	1/1:13:0,13	./.:0:.,.	./.:0:.,.	./.:0:.,.	./.:0:.,.	./.:0:.,.	./.:0:.,.	./.:0:.,.	1/1:11:0,11	./.:0:.,.	./.:0:.,.	./.:0:.,.	./.:0:.,.	./.:0:.,.	0/0:19:19,0	0/0:14:14,0	./.:0:.,.	./.:0:.,.	./.:0:.,.	./.:0:.,.	0/0:18:18,0	./.:0:.,.	./.:0:.,.	./.:0:.,.	0/1:15:8,7	0/0:13:13,0	./.:0:.,.
MockRefGenome	94863	.	T	C	.	PASS	AC=8;AF=0.040;DP=788;AV=16.38;NS=32	GT:DP:AD	0/0:14:14,0	./.:0:.,.	0/0:16:16,0	0/0:40:40,0	./.:0:.,.	./.:0:.,.	0/0:16:16,0	./.:0:.,.	0/0:21:21,0	./.:0:.,.	./.:0:.,.	0/0:20:20,0	./.:0:.,.	0/0:15:15,0	0/0:25:25,0	./.:0:.,.	./.:0:.,.	./.:0:.,.	0/1:8:3,5	./.:0:.,.	./.:0:.,.	./.:0:.,.	./.:0:.,.	0/0:17:17,0	./.:0:.,.	./.:0:.,.	./.:0:.,.	1/1:19:0,19	./.:0:.,.	./.:0:.,.	./.:0:.,.	0/0:17:17,0	./.:0:.,.	0/1:11:4,7	0/0:12:12,0	./.:0:.,.	./.:0:.,.	./.:0:.,.	./.:0:.,.	0/0:30:30,0	./.:0:.,.
MockRefGenome	94895	.	C	T	.	PASS	AC=32;AF=0.160;DP=808;AV=16.00;NS=35	GT:DP:AD	1/1:14:0,14	./.:0:.,.	0/0:16:16,0	1/1:40:0,40	./.:0:.,.	./.:0:.,.	0/0:18:18,0	./.:0:.,.	0/0:22:21,1	./.:0:.,.	./.:0:.,.	0/0:20:20,0	./.:0:.,.	0/0:15:15,0	0/0:26:26,0	./.:0:.,.	./.:0:.,.	./.:0:.,.	./.:0:.,.	./.:0:.,.	./.:0:.,.	./.:0:.,.	./.:0:.,.	0/0:17:17,0	./.:0:.,.	0/0:14:14,0	./.:0:.,.	0/0:19:19,0	./.:0:.,.	./.:0:.,.	./.:0:.,.	0/0:17:17,0	0/1:6:3,3	0/0:12:12,0	0/0:12:12,0	./.:0:.,.	./.:0:.,.	./.:0:.,.	./.:0:.,.	0/1:31:12,19	./.:0:.,.
MockRefGenome	94943	.	G	A	.	PASS	AC=35;AF=0.175;DP=847;AV=16.53;NS=36	GT:DP:AD	1/1:15:0,15	./.:0:.,.	0/0:18:18,0	1/1:43:0,43	./.:0:.,.	./.:0:.,.	0/1:18:10,8	./.:0:.,.	0/0:25:24,1	./.:0:.,.	./.:0:.,.	0/0:21:21,0	./.:0:.,.	0/0:16:16,0	0/0:26:26,0	./.:0:.,.	./.:0:.,.	./.:0:.,.	0/1:9:3,6	./.:0:.,.	./.:0:.,.	./.:0:.,.	./.:0:.,.	0/0:18:18,0	./.:0:.,.	0/0:14:14,0	./.:0:.,.	0/0:22:22,0	./.:0:.,.	./.:0:.,.	./.:0:.,.	0/0:17:17,0	./.:0:.,.	0/0:12:12,0	0/0:13:13,0	./.:0:.,.	./.:0:.,.	./.:0:.,.	./.:0:.,.	0/1:31:12,19	./.:0:.,.
MockRefGenome	94985	.	C	T	.	PASS	AC=34;AF=0.170;DP=846;AV=16.74;NS=35	GT:DP:AD	1/1:15:0,15	./.:0:.,.	1/1:18:0,18	1/1:43:0,43	./.:0:.,.	./.:0:.,.	0/0:18:18,0	./.:0:.,.	0/0:25:24,1	./.:0:.,.	./.:0:.,.	0/0:21:21,0	./.:0:.,.	0/0:16:16,0	0/0:26:26,0	./.:0:.,.	./.:0:.,.	./.:0:.,.	./.:0:.,.	./.:0:.,.	./.:0:.,.	./.:0:.,.	./.:0:.,.	0/0:18:18,0	./.:0:.,.	0/0:14:14,0	./.:0:.,.	0/0:22:22,0	./.:0:.,.	./.:0:.,.	./.:0:.,.	0/0:17:17,0	./.:0:.,.	0/0:12:12,0	0/0:13:13,0	./.:0:.,.	./.:0:.,.	./.:0:.,.	./.:0:.,.	0/1:31:12,19	./.:0:.,.
MockRefGenome	95353	.	C	T	.	PASS	AC=18;AF=0.090;DP=1251;AV=19.21;NS=52	GT:DP:AD	0/0:18:18,0	0/1:81:17,64	0/0:32:32,0	./.:0:.,.	0/0:17:17,0	./.:0:.,.	0/0:21:21,0	./.:0:.,.	0/0:55:55,0	./.:0:.,.	1/1:22:0,22	0/0:15:15,0	1/1:12:0,12	1/1:17:0,17	0/0:14:14,0	./.:0:.,.	1/1:12:0,12	1/1:13:0,13	./.:0:.,.	0/0:16:16,0	0/0:17:17,0	0/0:10:10,0	0/0:29:29,0	0/0:15:15,0	0/0:19:19,0	0/0:10:10,0	0/0:14:14,0	0/0:38:38,0	0/0:27:27,0	0/0:32:32,0	0/0:10:10,0	0/0:15:15,0	0/0:16:16,0	0/0:18:18,0	0/0:23:23,0	0/0:21:21,0	1/1:17:0,17	./.:0:.,.	0/0:15:15,0	0/0:32:32,0	0/0:11:11,0
MockRefGenome	95365	.	C	T	.	PASS	AC=18;AF=0.090;DP=1253;AV=19.23;NS=52	GT:DP:AD	0/0:18:18,0	0/1:81:17,64	0/0:32:32,0	./.:0:.,.	0/0:17:17,0	./.:0:.,.	0/0:21:21,0	./.:0:.,.	0/0:55:55,0	./.:0:.,.	1/1:22:0,22	0/0:15:15,0	1/1:12:0,12	1/1:17:0,17	0/0:14:14,0	./.:0:.,.	1/1:13:0,13	1/1:13:0,13	./.:0:.,.	0/0:16:16,0	0/0:17:17,0	0/0:10:10,0	0/0:29:29,0	0/0:15:15,0	0/0:19:19,0	0/0:10:10,0	0/0:14:14,0	0/0:38:38,0	0/0:27:27,0	0/0:32:32,0	0/0:10:10,0	0/0:15:15,0	0/0:16:16,0	0/0:18:18,0	0/0:23:23,0	0/0:21:21,0	1/1:17:0,17	./.:0:.,.	0/0:15:15,0	0/0:32:32,0	0/0:11:11,0
MockRefGenome	95368	.	A	G	.	PASS	AC=18;AF=0.090;DP=1253;AV=19.23;NS=52	GT:DP:AD	0/0:18:18,0	0/1:81:17,64	0/0:32:32,0	./.:0:.,.	0/0:17:17,0	./.:0:.,.	0/0:21:21,0	./.:0:.,.	0/0:55:55,0	./.:0:.,.	1/1:22:0,22	0/0:15:15,0	1/1:12:0,12	1/1:17:0,17	0/0:14:14,0	./.:0:.,.	1/1:13:0,13	1/1:13:0,13	./.:0:.,.	0/0:16:16,0	0/0:17:17,0	0/0:10:10,0	0/0:29:29,0	0/0:15:15,0	0/0:19:19,0	0/0:10:10,0	0/0:14:14,0	0/0:38:38,0	0/0:27:27,0	0/0:32:32,0	0/0:10:10,0	0/0:15:15,0	0/0:16:16,0	0/0:18:18,0	0/0:23:23,0	0/0:21:21,0	1/1:17:0,17	./.:0:.,.	0/0:15:15,0	0/0:32:32,0	0/0:11:11,0
MockRefGenome	95401	.	G	C	.	PASS	AC=16;AF=0.080;DP=1242;AV=19.12;NS=51	GT:DP:AD	1/1:18:0,18	0/0:81:81,0	0/0:31:31,0	./.:0:.,.	0/0:16:16,0	0/0:14:14,0	0/0:21:21,0	./.:0:.,.	0/0:55:55,0	./.:0:.,.	0/0:22:22,0	0/0:15:15,0	0/0:12:12,0	0/0:17:17,0	0/0:14:14,0	./.:0:.,.	0/0:13:13,0	0/0:13:13,0	./.:0:.,.	0/0:16:16,0	0/0:17:17,0	0/0:10:10,0	0/0:29:29,0	0/0:15:15,0	0/0:19:19,0	./.:0:.,.	0/0:14:14,0	0/0:38:38,0	0/0:27:27,0	0/0:29:29,0	0/0:10:10,0	0/0:15:15,0	0/0:16:16,0	0/0:18:18,0	0/0:23:23,0	0/0:21:21,0	0/0:17:17,0	0/1:7:4,3	0/1:15:7,8	0/1:32:21,11	./.:0:.,.
MockRefGenome	95416	.	C	T	.	PASS	AC=16;AF=0.080;DP=1221;AV=19.00;NS=51	GT:DP:AD	1/1:18:0,18	0/0:81:81,0	0/0:31:31,0	./.:0:.,.	0/0:16:16,0	0/0:14:14,0	0/0:21:21,0	./.:0:.,.	0/0:53:53,0	./.:0:.,.	0/0:22:22,0	0/0:15:15,0	0/0:12:12,0	0/0:17:17,0	0/0:14:14,0	./.:0:.,.	0/0:13:13,0	0/0:13:13,0	./.:0:.,.	0/0:16:16,0	0/0:17:17,0	0/0:10:10,0	0/0:29:29,0	0/0:15:15,0	0/0:19:19,0	./.:0:.,.	0/0:14:14,0	0/0:37:37,0	0/0:27:27,0	0/0:29:29,0	0/0:10:10,0	0/0:13:13,0	0/0:16:16,0	0/0:18:18,0	0/0:23:23,0	0/0:21:21,0	0/0:17:17,0	0/1:7:4,3	0/1:15:7,8	0/1:32:21,11	./.:0:.,.
MockRefGenome	95431	.	C	A	.	PASS	AC=13;AF=0.065;DP=1231;AV=18.96;NS=52	GT:DP:AD	0/0:18:18,0	0/0:81:81,0	0/0:31:31,0	./.:0:.,.	1/1:16:0,16	0/0:14:14,0	0/0:21:21,0	./.:0:.,.	0/0:52:52,0	./.:0:.,.	0/0:22:22,0	0/0:15:15,0	0/0:12:12,0	0/0:17:17,0	0/0:14:14,0	./.:0:.,.	0/0:13:13,0	0/0:13:13,0	./.:0:.,.	0/0:16:16,0	0/0:17:17,0	0/0:10:10,0	0/0:29:29,0	0/0:15:15,0	0/0:19:19,0	./.:0:.,.	0/0:13:13,0	0/0:36:36,0	0/0:27:26,1	1/1:29:0,29	0/0:10:10,0	0/0:13:13,0	0/1:16:8,8	0/1:18:14,4	1/1:23:0,23	1/1:21:0,21	0/0:16:16,0	./.:0:.,.	0/0:15:15,0	0/0:32:32,0	0/0:11:11,0
MockRefGenome	95437	.	C	T	.	PASS	AC=18;AF=0.090;DP=1230;AV=19.08;NS=51	GT:DP:AD	0/0:18:18,0	0/1:81:17,64	0/0:31:31,0	./.:0:.,.	0/0:16:16,0	./.:0:.,.	0/0:21:21,0	./.:0:.,.	0/0:52:52,0	./.:0:.,.	1/1:22:0,22	0/0:15:15,0	1/1:12:0,12	1/1:17:0,17	0/0:14:14,0	./.:0:.,.	1/1:13:0,13	1/1:13:0,13	./.:0:.,.	0/0:16:16,0	0/0:17:17,0	0/0:10:10,0	0/0:29:29,0	0/0:15:15,0	0/0:19:19,0	./.:0:.,.	0/0:14:14,0	0/0:36:36,0	0/0:27:27,0	0/0:28:28,0	0/0:10:10,0	0/0:13:13,0	0/0:16:16,0	0/0:18:18,0	0/0:23:23,0	0/0:21:21,0	1/1:16:0,16	./.:0:.,.	0/0:15:15,0	0/0:32:32,0	0/0:11:11,0
MockRefGenome	95545	.	G	T	.	PASS	AC=8;AF=0.040;DP=1338;AV=18.66;NS=58	GT:DP:AD	0/0:18:18,0	0/0:80:80,0	0/0:31:31,0	1/1:59:0,59	0/0:16:16,0	0/0:13:13,0	0/0:20:20,0	0/0:11:11,0	0/0:48:48,0	./.:0:.,.	0/0:22:22,0	0/0:13:13,0	0/0:11:11,0	0/0:18:18,0	0/0:12:12,0	./.:0:.,.	0/0:29:29,0	0/0:15:15,0	./.:0:.,.	0/0:15:15,0	0/0:16:16,0	0/0:10:10,0	0/0:27:27,0	0/0:15:15,0	0/0:15:15,0	0/0:10:10,0	0/0:12:12,0	0/0:34:34,0	0/0:27:27,0	0/0:26:26,0	./.:0:.,.	0/0:14:14,0	0/0:14:14,0	0/0:17:17,0	0/0:19:19,0	0/0:19:19,0	0/0:18:18,0	./.:0:.,.	0/0:12:12,0	0/0:31:31,0	0/0:11:11,0
MockRefGenome	95560	.	C	G	.	PASS	AC=8;AF=0.040;DP=1347;AV=18.81;NS=58	GT:DP:AD	0/0:18:18,0	0/0:81:81,0	0/0:31:31,0	1/1:59:0,59	0/0:17:17,0	0/0:13:13,0	0/0:20:20,0	0/0:11:11,0	0/0:48:48,0	./.:0:.,.	0/0:22:22,0	0/0:13:13,0	0/0:12:12,0	0/0:18:18,0	0/0:12:12,0	./.:0:.,.	0/0:29:29,0	0/0:16:16,0	./.:0:.,.	0/0:16:16,0	0/0:16:16,0	0/0:10:10,0	0/0:27:27,0	0/0:15:15,0	0/0:15:15,0	0/0:10:10,0	0/0:12:12,0	0/0:34:34,0	0/0:27:27,0	0/0:27:27,0	./.:0:.,.	0/0:14:14,0	0/0:14:14,0	0/0:17:17,0	0/0:20:20,0	0/0:19:19,0	0/0:18:18,0	./.:0:.,.	0/0:12:12,0	0/0:31:31,0	0/0:11:11,0
MockRefGenome	95565	.	C	A	.	PASS	AC=10;AF=0.050;DP=1354;AV=18.92;NS=59	GT:DP:AD	0/0:18:18,0	0/1:81:62,19	0/0:31:31,0	0/0:59:59,0	0/0:17:17,0	0/0:13:13,0	0/0:20:20,0	0/0:11:11,0	0/0:48:48,0	./.:0:.,.	0/1:22:17,5	0/0:13:13,0	0/0:12:12,0	0/1:18:14,4	0/0:12:12,0	./.:0:.,.	0/1:29:14,15	0/1:16:5,11	./.:0:.,.	0/0:16:16,0	0/0:16:16,0	0/0:10:10,0	0/0:28:28,0	0/0:15:15,0	0/0:16:16,0	0/0:10:10,0	0/0:12:12,0	0/0:35:35,0	0/0:27:27,0	0/0:30:30,0	./.:0:.,.	0/0:14:14,0	0/0:14:14,0	0/0:17:17,0	0/0:21:21,0	0/0:19:19,0	0/0:18:18,0	./.:0:.,.	0/0:12:12,0	0/0:31:31,0	0/0:11:11,0
MockRefGenome	95569	.	G	C	.	PASS	AC=51;AF=0.255;DP=1340;AV=18.80;NS=56	GT:DP:AD	1/1:18:0,18	0/0:81:81,0	0/0:31:31,0	1/1:59:0,59	0/0:17:17,0	./.:0:.,.	1/1:20:0,20	0/0:11:11,0	0/1:49:21,28	./.:0:.,.	0/0:22:22,0	0/1:13:10,3	0/0:12:12,0	0/0:18:18,0	0/0:13:13,0	./.:0:.,.	0/0:29:29,0	0/0:16:16,0	./.:0:.,.	0/1:16:8,8	0/1:16:8,8	0/0:10:10,0	0/0:28:28,0	1/1:15:0,15	0/1:16:7,9	0/1:10:4,6	1/1:13:0,13	0/1:36:13,23	1/1:27:1,26	0/0:30:30,0	./.:0:.,.	1/1:14:0,14	0/1:14:8,6	0/1:17:7,10	0/0:21:21,0	0/0:19:19,0	0/0:18:18,0	0/1:7:4,3	0/1:13:5,8	1/1:10:0,10	./.:0:.,.
MockRefGenome	96019	.	T	G	.	PASS	AC=38;AF=0.190;DP=844;AV=14.61;NS=36	GT:DP:AD	1/1:12:12,0	1/0:55:38,17	0/0:10:0,10	1/1:49:49,0	./.:0:.,.	0/0:14:0,14	./.:0:.,.	1/0:10:6,4	./.:0:.,.	./.:0:.,.	1/0:14:8,6	./.:0:.,.	1/0:13:8,5	1/0:13:8,5	0/0:15:0,15	0/0:12:0,12	./.:0:.,.	1/0:13:5,8	./.:0:.,.	./.:0:.,.	0/0:22:0,22	./.:0:.,.	./.:0:.,.	./.:0:.,.	0/0:15:0,15	./.:0:.,.	./.:0:.,.	./.:0:.,.	0/0:10:0,10	./.:0:.,.	./.:0:.,.	./.:0:.,.	./.:0:.,.	./.:0:.,.	./.:0:.,.	./.:0:.,.	1/0:16:8,8	./.:0:.,.	1/0:7:3,4	1/0:9:6,3	./.:0:.,.
MockRefGenome	96022	.	G	A	.	PASS	AC=38;AF=0.190;DP=851;AV=14.57;NS=37	GT:DP:AD	1/1:12:12,0	1/0:55:38,17	0/0:10:0,10	1/1:49:49,0	./.:0:.,.	0/0:14:0,14	./.:0:.,.	1/0:10:6,4	./.:0:.,.	./.:0:.,.	1/0:14:8,6	./.:0:.,.	1/0:13:8,5	1/0:13:8,5	0/0:15:0,15	0/0:12:0,12	./.:0:.,.	1/0:13:5,8	./.:0:.,.	./.:0:.,.	0/0:22:0,22	./.:0:.,.	./.:0:.,.	./.:0:.,.	0/0:15:0,15	./.:0:.,.	./.:0:.,.	./.:0:.,.	0/0:10:0,10	./.:0:.,.	./.:0:.,.	./.:0:.,.	./.:0:.,.	./.:0:.,.	./.:0:.,.	0/0:13:0,13	1/0:16:8,8	./.:0:.,.	1/0:7:3,4	1/0:9:6,3	./.:0:.,.
MockRefGenome	96037	.	C	G	.	PASS	AC=35;AF=0.175;DP=851;AV=14.94;NS=35	GT:DP:AD	1/1:12:12,0	1/0:55:31,24	0/0:10:0,10	1/1:49:49,0	./.:0:.,.	0/0:14:0,14	./.:0:.,.	./.:0:.,.	./.:0:.,.	./.:0:.,.	1/0:14:8,6	./.:0:.,.	1/0:13:8,5	0/0:13:0,13	0/0:15:0,15	0/0:12:0,12	./.:0:.,.	1/0:13:5,8	./.:0:.,.	./.:0:.,.	0/0:22:0,22	./.:0:.,.	./.:0:.,.	./.:0:.,.	0/0:15:0,15	./.:0:.,.	./.:0:.,.	./.:0:.,.	0/0:10:0,10	./.:0:.,.	./.:0:.,.	./.:0:.,.	./.:0:.,.	./.:0:.,.	./.:0:.,.	0/0:13:0,13	1/0:16:8,8	./.:0:.,.	1/0:7:3,4	1/0:9:6,3	./.:0:.,.
MockRefGenome	96112	.	G	A	.	PASS	AC=11;AF=0.055;DP=831;AV=14.92;NS=36	GT:DP:AD	0/0:12:12,0	0/0:53:53,0	0/0:10:10,0	0/0:48:48,0	./.:0:.,.	0/0:14:14,0	0/0:11:11,0	./.:0:.,.	./.:0:.,.	./.:0:.,.	0/1:14:8,6	./.:0:.,.	0/0:13:13,0	0/1:13:8,5	0/0:15:15,0	1/1:12:0,12	./.:0:.,.	0/1:12:5,7	./.:0:.,.	./.:0:.,.	0/0:22:22,0	./.:0:.,.	./.:0:.,.	./.:0:.,.	0/0:15:15,0	./.:0:.,.	./.:0:.,.	./.:0:.,.	0/0:10:10,0	./.:0:.,.	./.:0:.,.	./.:0:.,.	./.:0:.,.	./.:0:.,.	./.:0:.,.	0/0:13:13,0	0/1:16:8,8	./.:0:.,.	./.:0:.,.	./.:0:.,.	./.:0:.,.
MockRefGenome	96140	.	C	T	.	PASS	AC=13;AF=0.065;DP=816;AV=14.74;NS=34	GT:DP:AD	0/0:12:12,0	0/0:51:51,0	0/1:10:4,6	0/0:48:48,0	./.:0:.,.	1/1:14:0,14	./.:0:.,.	0/0:10:10,0	./.:0:.,.	./.:0:.,.	0/0:13:13,0	./.:0:.,.	0/0:13:13,0	0/0:13:13,0	1/1:15:0,15	0/0:12:12,0	0/0:10:10,0	0/0:12:12,0	./.:0:.,.	./.:0:.,.	1/1:19:0,19	./.:0:.,.	./.:0:.,.	./.:0:.,.	0/0:15:15,0	./.:0:.,.	./.:0:.,.	./.:0:.,.	./.:0:.,.	./.:0:.,.	./.:0:.,.	./.:0:.,.	./.:0:.,.	./.:0:.,.	./.:0:.,.	0/0:13:13,0	0/0:16:16,0	./.:0:.,.	0/1:7:3,4	0/1:9:6,3	./.:0:.,.
MockRefGenome	96207	.	C	T	.	PASS	AC=4;AF=0.020;DP=709;AV=15.23;NS=30	GT:DP:AD	0/0:11:11,0	0/1:51:27,24	./.:0:.,.	0/0:47:47,0	./.:0:.,.	0/0:12:12,0	0/0:10:10,0	0/0:14:14,0	./.:0:.,.	./.:0:.,.	./.:0:.,.	./.:0:.,.	0/1:12:8,4	0/1:17:12,5	0/0:14:14,0	0/0:12:12,0	0/0:11:11,0	0/0:12:12,0	./.:0:.,.	./.:0:.,.	0/0:18:18,0	./.:0:.,.	./.:0:.,.	./.:0:.,.	0/0:14:14,0	./.:0:.,.	./.:0:.,.	./.:0:.,.	./.:0:.,.	./.:0:.,.	./.:0:.,.	./.:0:.,.	./.:0:.,.	./.:0:.,.	./.:0:.,.	./.:0:.,.	0/0:14:14,0	./.:0:.,.	./.:0:.,.	./.:0:.,.	./.:0:.,.
MockRefGenome	96225	.	C	G	.	PASS	AC=8;AF=0.040;DP=714;AV=15.39;NS=31	GT:DP:AD	0/1:11:5,6	0/0:51:51,0	./.:0:.,.	0/0:47:47,0	./.:0:.,.	1/1:12:0,12	0/0:10:10,0	0/0:14:14,0	./.:0:.,.	./.:0:.,.	0/0:14:14,0	./.:0:.,.	0/0:12:12,0	0/0:17:17,0	0/0:14:14,0	0/0:12:12,0	0/0:11:11,0	0/0:12:12,0	./.:0:.,.	./.:0:.,.	1/1:18:0,18	./.:0:.,.	./.:0:.,.	./.:0:.,.	1/1:14:0,14	./.:0:.,.	./.:0:.,.	./.:0:.,.	./.:0:.,.	./.:0:.,.	./.:0:.,.	./.:0:.,.	./.:0:.,.	./.:0:.,.	./.:0:.,.	./.:0:.,.	0/0:14:14,0	./.:0:.,.	./.:0:.,.	./.:0:.,.	./.:0:.,.
MockRefGenome	96309	.	A	G	.	PASS	AC=6;AF=0.030;DP=796;AV=15.86;NS=37	GT:DP:AD	0/0:12:12,0	0/0:56:56,0	./.:0:.,.	0/0:50:50,0	./.:0:.,.	0/0:14:14,0	0/0:11:11,0	0/0:14:14,0	./.:0:.,.	./.:0:.,.	0/0:15:15,0	./.:0:.,.	0/0:13:13,0	0/0:21:21,0	0/0:15:15,0	0/0:15:15,0	0/0:14:14,0	0/0:13:13,0	./.:0:.,.	./.:0:.,.	0/0:22:22,0	./.:0:.,.	./.:0:.,.	./.:0:.,.	0/0:15:15,0	./.:0:.,.	./.:0:.,.	./.:0:.,.	./.:0:.,.	./.:0:.,.	./.:0:.,.	./.:0:.,.	./.:0:.,.	./.:0:.,.	./.:0:.,.	./.:0:.,.	0/0:17:17,0	./.:0:.,.	./.:0:.,.	./.:0:.,.	./.:0:.,.
MockRefGenome	97054	.	G	A	.	PASS	AC=13;AF=0.065;DP=1182;AV=25.54;NS=35	GT:DP:AD	./.:0:.,.	0/1:181:43,138	0/0:26:26,0	./.:0:.,.	0/0:32:32,0	0/0:15:15,0	./.:0:.,.	./.:0:.,.	./.:0:.,.	0/1:17:5,12	0/1:12:8,4	0/0:18:18,0	0/1:18:4,14	0/1:22:2,20	0/0:42:42,0	0/1:20:4,16	0/1:10:4,6	0/1:16:11,5	./.:0:.,.	./.:0:.,.	0/0:28:28,0	0/0:14:14,0	./.:0:.,.	0/0:15:15,0	0/0:11:11,0	./.:0:.,.	./.:0:.,.	0/0:38:38,0	0/0:22:22,0	0/1:21:14,7	0/0:12:12,0	0/0:40:40,0	0/0:14:14,0	0/0:11:11,0	0/0:51:51,0	0/0:10:10,0	1/1:17:0,17	./.:0:.,.	./.:0:.,.	./.:0:.,.	./.:0:.,.
MockRefGenome	97667	.	G	A	.	PASS	AC=41;AF=0.205;DP=1351;AV=16.16;NS=70	GT:DP:AD	1/1:27:0,27	0/0:51:51,0	0/0:23:23,0	0/1:71:37,34	0/0:15:15,0	0/0:11:11,0	0/0:17:17,0	0/0:10:10,0	0/0:34:34,0	0/1:27:23,4	./.:0:.,.	0/0:24:24,0	./.:0:.,.	0/0:12:12,0	0/0:13:13,0	0/0:15:15,0	0/0:11:11,0	0/0:12:12,0	0/0:10:10,0	./.:0:.,.	0/0:12:12,0	0/0:12:12,0	./.:0:.,.	0/0:12:12,0	0/0:13:13,0	./.:0:.,.	0/0:14:14,0	0/0:20:20,0	0/0:13:13,0	0/0:12:12,0	./.:0:.,.	0/0:12:12,0	0/1:9:4,5	1/1:15:0,15	0/0:13:13,0	0/0:14:14,0	0/0:19:19,0	./.:0:.,.	0/1:13:7,6	0/1:18:6,12	0/1:7:3,4
MockRefGenome	97694	.	G	A	.	PASS	AC=37;AF=0.185;DP=1360;AV=16.38;NS=68	GT:DP:AD	0/1:27:11,16	0/1:51:38,13	0/0:23:23,0	0/1:72:35,37	0/1:15:8,7	0/0:11:11,0	0/0:18:18,0	0/0:10:10,0	0/0:34:34,0	0/1:27:23,4	0/0:14:14,0	0/0:24:24,0	./.:0:.,.	0/0:12:12,0	0/0:13:13,0	0/0:15:15,0	0/0:11:11,0	0/0:12:12,0	0/0:10:10,0	./.:0:.,.	0/0:12:12,0	0/0:12:12,0	0/0:14:14,0	0/0:12:12,0	0/0:13:13,0	./.:0:.,.	0/0:14:14,0	0/0:21:21,0	0/0:13:13,0	0/0:12:12,0	./.:0:.,.	0/0:12:12,0	./.:0:.,.	1/1:15:0,15	./.:0:.,.	0/0:14:14,0	0/0:19:19,0	./.:0:.,.	0/0:14:14,0	0/1:18:14,4	./.:0:.,.
MockRefGenome	97703	.	C	T	.	PASS	AC=9;AF=0.045;DP=1366;AV=17.25;NS=64	GT:DP:AD	0/0:27:27,0	0/1:51:39,12	0/0:23:23,0	0/0:72:72,0	0/0:15:15,0	0/0:11:11,0	0/0:18:18,0	0/1:10:4,6	0/0:34:34,0	0/1:27:11,16	0/1:14:8,6	0/0:24:24,0	./.:0:.,.	0/1:12:9,3	0/0:13:13,0	0/1:15:7,8	0/1:11:3,8	0/0:12:12,0	0/0:10:10,0	./.:0:.,.	0/0:12:12,0	0/0:12:12,0	0/0:14:14,0	0/0:12:12,0	0/0:13:13,0	./.:0:.,.	0/0:14:14,0	0/0:21:21,0	0/0:13:13,0	0/1:12:6,6	./.:0:.,.	0/0:12:12,0	./.:0:.,.	0/0:15:15,0	0/0:13:13,0	0/0:14:14,0	0/1:19:9,10	./.:0:.,.	0/0:14:14,0	0/0:18:18,0	./.:0:.,.
MockRefGenome	97709	.	G	C	.	PASS	AC=9;AF=0.045;DP=1364;AV=17.23;NS=64	GT:DP:AD	0/0:27:27,0	0/1:51:39,12	0/0:23:23,0	0/0:72:72,0	0/0:15:15,0	0/0:11:11,0	0/0:18:18,0	0/1:10:4,6	0/0:34:34,0	0/1:27:11,16	0/1:14:8,6	0/0:24:24,0	./.:0:.,.	0/1:12:9,3	0/0:13:13,0	0/1:15:7,8	0/1:11:3,8	0/0:12:12,0	0/0:10:10,0	./.:0:.,.	0/0:12:12,0	0/0:12:12,0	0/0:14:14,0	0/0:12:12,0	0/0:13:13,0	./.:0:.,.	0/0:14:14,0	0/0:21:21,0	0/0:13:13,0	0/1:12:6,6	./.:0:.,.	0/0:12:12,0	./.:0:.,.	0/0:15:15,0	0/0:13:13,0	0/0:14:14,0	0/1:19:9,10	./.:0:.,.	0/0:14:14,0	0/0:18:18,0	./.:0:.,.
MockRefGenome	97733	.	T	C	.	PASS	AC=28;AF=0.140;DP=1348;AV=16.45;NS=67	GT:DP:AD	0/0:26:26,0	0/0:51:51,0	0/1:23:11,12	0/0:72:72,0	0/0:15:15,0	0/1:11:8,3	0/1:18:11,7	0/0:10:10,0	0/1:33:19,14	0/0:27:27,0	0/0:14:14,0	1/1:24:0,24	./.:0:.,.	./.:0:.,.	0/0:13:13,0	0/0:15:15,0	0/0:11:11,0	0/0:12:12,0	0/1:10:5,5	./.:0:.,.	1/1:12:0,12	0/1:12:8,4	0/1:13:5,8	1/1:12:0,12	0/0:13:13,0	0/1:8:3,5	0/1:14:6,8	0/1:21:7,14	0/0:13:13,0	0/0:12:12,0	0/1:9:5,4	0/0:12:12,0	./.:0:.,.	0/0:15:15,0	0/0:13:13,0	0/0:14:14,0	0/0:19:19,0	./.:0:.,.	0/1:14:7,7	./.:0:.,.	0/1:7:4,3
MockRefGenome	97766	.	A	T	.	PASS	AC=14;AF=0.070;DP=1291;AV=16.72;NS=61	GT:DP:AD	0/1:25:10,15	0/0:50:50,0	0/0:23:23,0	0/0:71:71,0	0/1:15:6,9	./.:0:.,.	0/0:17:17,0	0/0:10:10,0	0/0:31:31,0	0/0:27:27,0	0/0:12:12,0	0/0:22:22,0	./.:0:.,.	0/0:12:12,0	0/0:13:13,0	0/0:15:15,0	0/0:11:11,0	0/0:12:12,0	./.:0:.,.	./.:0:.,.	0/0:11:11,0	0/0:12:12,0	0/0:13:13,0	0/0:12:12,0	0/0:13:13,0	./.:0:.,.	0/0:13:13,0	0/0:20:20,0	1/1:13:0,13	0/1:9:5,4	./.:0:.,.	1/1:12:0,12	./.:0:.,.	0/1:15:3,12	1/1:13:0,13	1/1:13:0,13	0/0:19:19,0	./.:0:.,.	0/0:13:13,0	0/0:18:18,0	./.:0:.,.
MockRefGenome	97874	.	C	T	.	PASS	AC=15;AF=0.075;DP=1288;AV=16.44;NS=63	GT:DP:AD	0/0:27:27,0	0/0:50:50,0	0/1:22:12,10	0/0:70:70,0	0/0:15:15,0	0/0:11:11,0	0/0:17:17,0	0/0:10:10,0	0/0:30:29,1	0/0:24:24,0	0/0:14:14,0	0/0:24:24,0	./.:0:.,.	0/0:12:12,0	1/1:13:0,13	0/0:14:14,0	0/0:20:20,0	0/0:12:12,0	0/0:10:10,0	./.:0:.,.	0/0:11:11,0	0/1:10:4,6	0/0:11:11,0	0/0:12:12,0	1/1:13:0,13	0/1:7:4,3	0/1:13:7,6	0/1:20:14,6	0/0:13:13,0	0/0:11:11,0	./.:0:.,.	0/0:11:11,0	./.:0:.,.	0/0:14:14,0	0/0:13:13,0	0/0:10:10,0	0/0:19:19,0	./.:0:.,.	0/0:12:12,0	0/0:17:17,0	./.:0:.,.
MockRefGenome	97907	.	G	C	.	PASS	AC=31;AF=0.155;DP=1309;AV=16.26;NS=66	GT:DP:AD	0/1:27:16,11	0/0:51:51,0	0/0:22:22,0	0/1:70:36,34	0/0:15:15,0	0/0:11:11,0	0/0:17:17,0	0/0:10:10,0	0/0:31:31,0	0/0:24:24,0	0/0:14:14,0	0/0:24:24,0	./.:0:.,.	0/0:12:12,0	0/0:13:13,0	0/0:14:14,0	0/0:20:20,0	0/0:12:12,0	0/0:10:10,0	./.:0:.,.	0/0:11:11,0	0/0:10:10,0	./.:0:.,.	0/0:12:12,0	0/0:13:13,0	./.:0:.,.	0/0:14:14,0	0/0:20:20,0	0/0:13:13,0	0/0:11:11,0	./.:0:.,.	0/0:11:11,0	./.:0:.,.	0/0:16:16,0	0/0:13:13,0	0/0:13:13,0	0/0:19:19,0	./.:0:.,.	0/1:12:7,5	0/1:18:6,12	0/1:7:3,4
MockRefGenome	97913	.	G	C	.	PASS	AC=33;AF=0.165;DP=1307;AV=16.24;NS=67	GT:DP:AD	0/1:27:16,11	0/0:51:51,0	0/0:22:22,0	0/1:70:36,34	0/0:15:15,0	0/0:11:11,0	0/0:17:17,0	0/0:10:10,0	0/0:31:31,0	0/0:24:24,0	0/0:14:14,0	0/0:24:24,0	./.:0:.,.	0/0:12:12,0	0/0:13:13,0	0/0:14:14,0	0/0:20:20,0	0/0:12:12,0	0/0:10:10,0	./.:0:.,.	0/0:11:11,0	0/0:10:10,0	./.:0:.,.	0/0:12:12,0	0/0:13:13,0	./.:0:.,.	0/0:14:14,0	0/0:21:21,0	0/0:13:13,0	0/0:11:11,0	./.:0:.,.	0/0:11:11,0	./.:0:.,.	0/0:16:16,0	0/0:13:13,0	0/0:13:13,0	0/0:19:19,0	./.:0:.,.	0/1:12:7,5	0/1:18:6,12	0/1:7:3,4
MockRefGenome	97949	.	C	T	.	PASS	AC=48;AF=0.240;DP=1359;AV=16.00;NS=73	GT:DP:AD	0/1:27:16,11	0/1:51:26,25	0/0:23:23,0	0/1:72:37,35	0/0:15:15,0	0/0:11:11,0	0/1:18:7,11	0/1:10:3,7	0/1:34:16,18	0/1:27:12,15	0/0:14:14,0	0/0:24:24,0	0/1:9:4,5	0/1:12:9,3	0/0:13:13,0	0/1:15:4,11	0/0:20:20,0	0/0:12:12,0	0/0:10:10,0	./.:0:.,.	0/0:12:12,0	0/0:12:12,0	0/1:14:8,6	0/0:12:12,0	0/0:13:13,0	./.:0:.,.	0/0:14:14,0	0/0:21:21,0	0/0:13:13,0	0/1:12:6,6	./.:0:.,.	0/0:12:12,0	./.:0:.,.	1/1:16:0,16	0/0:13:13,0	0/0:14:14,0	./.:0:.,.	./.:0:.,.	0/1:14:7,7	0/1:18:6,12	0/1:7:3,4
MockRefGenome	97967	.	A	G	.	PASS	AC=32;AF=0.160;DP=1359;AV=16.59;NS=68	GT:DP:AD	0/1:27:16,11	0/0:51:51,0	0/0:23:23,0	0/1:72:37,35	0/0:15:15,0	0/0:11:11,0	0/0:18:18,0	0/0:10:10,0	0/0:34:34,0	0/0:27:27,0	0/0:14:14,0	0/0:24:24,0	./.:0:.,.	0/0:12:12,0	0/0:13:13,0	0/0:15:15,0	0/0:20:20,0	0/0:12:12,0	0/0:10:10,0	./.:0:.,.	0/0:12:12,0	0/0:12:12,0	./.:0:.,.	0/0:12:12,0	0/0:13:13,0	./.:0:.,.	0/0:14:14,0	0/0:21:21,0	0/0:13:13,0	0/0:12:12,0	./.:0:.,.	0/0:12:12,0	./.:0:.,.	0/0:16:16,0	0/0:13:13,0	0/0:14:14,0	0/0:19:19,0	./.:0:.,.	0/1:14:7,7	0/1:18:6,12	0/1:7:3,4
MockRefGenome	98021	.	T	G	.	PASS	AC=9;AF=0.045;DP=1321;AV=17.02;NS=63	GT:DP:AD	0/0:17:17,0	0/0:61:61,0	0/0:16:16,0	0/0:33:33,0	0/0:14:14,0	0/0:17:17,0	0/0:18:18,0	0/0:13:13,0	0/0:35:34,1	./.:0:.,.	0/0:13:13,0	0/0:22:22,0	./.:0:.,.	0/0:21:21,0	0/0:12:12,0	0/0:15:15,0	0/0:12:12,0	0/1:21:17,4	0/1:7:4,3	./.:0:.,.	0/0:10:10,0	./.:0:.,.	0/0:17:17,0	./.:0:.,.	0/1:17:5,12	0/1:17:6,11	0/0:15:15,0	0/0:23:23,0	./.:0:.,.	0/0:19:19,0	0/0:14:14,0	0/1:18:5,13	0/0:13:13,0	0/0:14:14,0	1/1:27:0,27	0/0:10:10,0	0/0:10:10,0	./.:0:.,.	0/0:21:21,0	0/0:20:20,0	./.:0:.,.
MockRefGenome	98042	.	G	A	.	PASS	AC=9;AF=0.045;DP=1314;AV=16.87;NS=62	GT:DP:AD	0/0:17:17,0	0/0:61:61,0	0/0:16:16,0	0/0:33:33,0	0/0:14:14,0	0/0:17:17,0	./.:0:.,.	0/0:13:13,0	0/0:35:35,0	./.:0:.,.	0/0:13:13,0	0/0:22:22,0	0/0:13:13,0	0/0:21:21,0	0/0:12:12,0	0/0:16:16,0	0/0:12:12,0	./.:0:.,.	./.:0:.,.	./.:0:.,.	./.:0:.,.	./.:0:.,.	0/0:17:17,0	./.:0:.,.	0/0:17:17,0	0/0:17:17,0	0/0:15:15,0	0/0:23:23,0	./.:0:.,.	0/0:19:19,0	0/0:14:14,0	0/0:18:18,0	0/0:13:13,0	0/0:14:14,0	0/0:27:27,0	0/0:10:10,0	0/0:10:10,0	0/1:7:4,3	0/1:21:13,8	0/0:20:20,0	./.:0:.,.
MockRefGenome	98066	.	G	A	.	PASS	AC=13;AF=0.065;DP=1301;AV=16.42;NS=65	GT:DP:AD	0/0:17:17,0	0/0:61:61,0	0/0:16:16,0	0/0:32:32,0	0/0:14:14,0	0/1:16:8,8	0/0:18:18,0	0/0:13:13,0	0/0:35:35,0	./.:0:.,.	0/0:13:13,0	0/0:22:22,0	0/0:13:13,0	0/0:21:21,0	0/1:12:5,7	0/0:16:16,0	0/0:12:12,0	0/0:20:20,0	0/1:7:3,4	./.:0:.,.	0/1:9:4,5	0/1:8:5,3	0/1:16:8,8	0/1:7:4,3	0/1:16:11,5	0/0:17:17,0	0/0:15:15,0	0/0:22:22,0	./.:0:.,.	0/1:19:12,7	0/0:13:13,0	./.:0:.,.	0/0:13:13,0	0/0:14:14,0	0/0:26:26,0	0/0:10:10,0	0/0:10:10,0	./.:0:.,.	0/0:21:21,0	0/0:19:19,0	./.:0:.,.
MockRefGenome	98069	.	G	A	.	PASS	AC=36;AF=0.180;DP=1299;AV=16.52;NS=60	GT:DP:AD	0/1:17:5,12	0/0:61:61,0	0/0:16:16,0	0/1:32:17,15	0/1:14:6,8	0/0:16:16,0	./.:0:.,.	0/0:13:13,0	0/0:35:35,0	./.:0:.,.	0/0:13:13,0	0/0:22:22,0	./.:0:.,.	0/0:21:21,0	0/0:12:12,0	0/0:16:16,0	0/1:12:6,6	0/1:20:13,7	./.:0:.,.	./.:0:.,.	./.:0:.,.	./.:0:.,.	0/0:16:16,0	./.:0:.,.	0/0:16:16,0	0/0:17:17,0	0/0:15:15,0	0/0:22:22,0	./.:0:.,.	0/0:19:19,0	0/0:13:13,0	0/0:18:18,0	0/0:13:13,0	0/0:14:14,0	0/0:26:26,0	0/0:10:10,0	0/0:10:10,0	0/1:7:3,4	0/1:21:8,13	0/1:18:14,4	./.:0:.,.
MockRefGenome	98173	.	C	T	.	PASS	AC=10;AF=0.050;DP=1238;AV=16.94;NS=54	GT:DP:AD	0/0:19:19,0	0/0:60:60,0	0/1:17:7,10	0/0:40:39,1	0/0:13:13,0	0/0:15:15,0	0/0:18:18,0	0/0:12:12,0	0/0:33:32,1	0/0:14:14,0	0/0:11:11,0	0/1:19:8,11	0/0:13:13,0	0/0:20:20,0	0/0:11:11,0	./.:0:.,.	0/0:12:12,0	0/0:19:19,0	./.:0:.,.	./.:0:.,.	./.:0:.,.	./.:0:.,.	0/0:17:17,0	./.:0:.,.	0/0:17:17,0	0/1:16:12,4	0/0:15:15,0	0/1:21:11,10	./.:0:.,.	0/0:16:16,0	0/1:14:5,9	0/1:17:13,4	0/0:11:11,0	0/0:13:13,0	0/0:25:25,0	./.:0:.,.	./.:0:.,.	./.:0:.,.	./.:0:.,.	0/1:17:10,7	./.:0:.,.
MockRefGenome	98185	.	G	A	.	PASS	AC=11;AF=0.055;DP=1255;AV=16.81;NS=57	GT:DP:AD	0/0:19:19,0	0/0:60:60,0	0/1:17:7,10	0/0:40:40,0	0/0:13:13,0	0/0:15:15,0	0/0:18:18,0	0/0:12:12,0	0/0:33:33,0	0/0:15:15,0	0/0:11:11,0	0/1:20:9,11	0/0:13:13,0	0/0:20:20,0	0/0:11:11,0	0/0:14:14,0	0/0:12:12,0	0/0:19:19,0	./.:0:.,.	./.:0:.,.	./.:0:.,.	./.:0:.,.	0/0:17:17,0	0/1:7:4,3	0/0:17:17,0	0/1:16:12,4	0/0:15:15,0	0/1:22:12,10	./.:0:.,.	0/0:16:16,0	0/1:14:5,9	0/1:17:13,4	0/0:11:11,0	0/0:13:13,0	0/0:25:25,0	./.:0:.,.	./.:0:.,.	./.:0:.,.	./.:0:.,.	0/1:17:10,7	./.:0:.,.
MockRefGenome	98260	.	G	A	.	PASS	AC=23;AF=0.115;DP=1335;AV=16.90;NS=59	GT:DP:AD	0/1:20:7,13	0/0:61:61,0	0/0:17:17,0	0/1:41:22,19	0/0:14:14,0	0/0:17:17,0	0/0:18:18,0	0/0:13:13,0	0/0:34:34,0	0/0:16:16,0	0/0:13:13,0	0/0:20:20,0	0/0:13:13,0	0/0:21:21,0	0/0:12:12,0	0/0:16:16,0	0/0:12:12,0	0/0:20:20,0	./.:0:.,.	./.:0:.,.	./.:0:.,.	./.:0:.,.	0/0:17:17,0	./.:0:.,.	0/0:17:17,0	0/0:17:17,0	0/0:15:15,0	0/0:23:23,0	./.:0:.,.	0/0:17:17,0	0/0:14:14,0	0/0:18:18,0	0/0:13:13,0	0/0:14:14,0	0/0:27:27,0	./.:0:.,.	./.:0:.,.	./.:0:.,.	0/1:21:16,5	0/1:19:15,4	./.:0:.,.
MockRefGenome	98266	.	G	A	.	PASS	AC=23;AF=0.115;DP=1345;AV=16.92;NS=60	GT:DP:AD	0/1:20:7,13	0/0:61:61,0	0/0:17:17,0	0/1:41:22,19	0/0:14:14,0	0/0:17:17,0	0/0:18:18,0	0/0:13:13,0	0/0:35:35,0	0/0:16:16,0	0/0:13:13,0	0/0:22:22,0	0/0:13:13,0	0/0:21:21,0	0/0:12:12,0	0/0:16:16,0	0/0:12:12,0	0/0:21:21,0	./.:0:.,.	./.:0:.,.	./.:0:.,.	./.:0:.,.	0/0:17:17,0	./.:0:.,.	0/0:17:17,0	0/0:17:17,0	0/0:15:15,0	0/0:23:23,0	./.:0:.,.	0/0:18:18,0	0/0:14:14,0	0/0:18:18,0	0/0:13:13,0	0/0:14:14,0	0/0:27:27,0	0/0:10:10,0	./.:0:.,.	./.:0:.,.	0/1:21:16,5	0/1:19:15,4	./.:0:.,.
MockRefGenome	98287	.	C	T	.	PASS	AC=11;AF=0.055;DP=1351;AV=17.30;NS=61	GT:DP:AD	0/0:20:20,0	0/0:61:61,0	0/0:17:17,0	0/0:41:41,0	0/0:14:14,0	0/0:17:17,0	0/0:18:18,0	0/0:13:13,0	0/0:35:35,0	0/0:16:16,0	./.:0:.,.	0/0:22:22,0	./.:0:.,.	0/1:21:15,6	0/0:12:12,0	0/1:16:10,6	./.:0:.,.	./.:0:.,.	./.:0:.,.	./.:0:.,.	0/0:10:10,0	./.:0:.,.	0/0:17:17,0	./.:0:.,.	0/0:17:17,0	0/0:17:17,0	0/0:15:15,0	0/0:23:23,0	./.:0:.,.	0/0:18:18,0	0/0:14:14,0	0/1:18:5,13	0/0:13:13,0	0/0:14:14,0	0/1:27:14,13	0/0:10:10,0	0/1:9:6,3	./.:0:.,.	0/0:21:21,0	0/0:19:19,0	./.:0:.,.
MockRefGenome	98294	.	G	A	.	PASS	AC=10;AF=0.050;DP=1353;AV=16.94;NS=65	GT:DP:AD	0/0:20:20,0	0/0:61:61,0	0/0:17:17,0	0/0:41:41,0	0/0:14:14,0	0/0:17:17,0	./.:0:.,.	0/0:13:13,0	0/0:35:35,0	0/0:16:16,0	0/0:13:13,0	0/0:22:22,0	0/0:13:13,0	0/0:21:21,0	0/0:12:12,0	0/0:16:16,0	0/0:12:12,0	0/0:21:21,0	./.:0:.,.	./.:0:.,.	0/0:10:10,0	./.:0:.,.	0/0:17:17,0	./.:0:.,.	0/0:17:17,0	0/0:17:17,0	0/0:15:15,0	0/0:23:23,0	./.:0:.,.	0/0:18:18,0	0/0:14:14,0	0/0:18:18,0	0/0:13:13,0	0/0:14:14,0	0/0:27:27,0	0/0:10:10,0	./.:0:.,.	0/1:7:4,3	0/1:21:13,8	0/0:19:19,0	./.:0:.,.
MockRefGenome	100319	.	A	G	.	PASS	AC=26;AF=0.130;DP=1435;AV=18.04;NS=69	GT:DP:AD	1/1:39:0,39	0/0:56:56,0	0/0:21:21,0	1/1:47:0,47	0/1:11:5,6	0/0:19:19,0	0/0:18:18,0	0/0:16:16,0	0/0:40:40,0	0/0:14:14,0	0/0:17:17,0	0/0:19:19,0	0/0:19:19,0	0/0:20:20,0	0/0:16:16,0	0/0:21:21,0	./.:0:.,.	0/0:20:20,0	./.:0:.,.	0/0:18:18,0	0/0:18:18,0	0/0:17:17,0	0/0:12:12,0	0/0:14:14,0	0/0:21:21,0	0/0:15:15,0	0/0:16:16,0	0/0:24:24,0	0/1:34:19,15	1/1:22:0,22	0/0:14:14,0	0/0:17:17,0	0/0:16:16,0	0/0:30:30,0	0/0:26:26,0	0/1:15:8,7	0/0:23:23,0	0/0:11:11,0	0/0:18:18,0	0/0:16:16,0	0/0:13:13,0
MockRefGenome	100356	.	C	A	.	PASS	AC=17;AF=0.085;DP=1430;AV=17.58;NS=73	GT:DP:AD	0/0:39:39,0	0/0:55:55,0	0/0:21:21,0	0/0:47:47,0	0/0:11:11,0	0/0:19:19,0	0/0:18:18,0	0/0:16:16,0	0/0:40:40,0	0/0:14:14,0	0/0:17:17,0	0/1:19:10,9	0/0:19:19,0	0/0:20:20,0	0/1:16:6,10	0/0:21:21,0	0/0:20:20,0	0/0:20:20,0	0/1:9:4,5	0/1:18:6,12	0/1:18:6,12	0/0:16:16,0	0/0:12:12,0	0/0:14:14,0	0/0:21:21,0	0/1:15:6,9	0/0:16:16,0	0/0:24:24,0	0/0:34:34,0	0/0:22:22,0	0/0:14:14,0	0/0:17:17,0	0/0:16:16,0	0/0:30:30,0	0/0:26:26,0	0/0:15:15,0	0/0:23:23,0	0/1:11:3,8	0/1:18:8,10	0/1:15:6,9	0/0:13:13,0
MockRefGenome	100379	.	T	C	.	PASS	AC=22;AF=0.110;DP=1410;AV=17.55;NS=71	GT:DP:AD	0/0:39:39,0	0/0:54:54,0	0/0:21:21,0	0/0:47:47,0	0/0:11:11,0	0/0:18:18,0	1/1:18:0,18	0/0:16:16,0	0/1:40:17,23	0/0:13:13,0	0/0:17:17,0	0/0:19:19,0	0/0:19:19,0	0/0:20:20,0	0/0:16:16,0	0/0:21:21,0	0/0:20:20,0	0/0:20:20,0	./.:0:.,.	0/0:18:18,0	0/0:17:17,0	0/0:15:15,0	0/0:12:12,0	1/1:14:0,14	0/1:21:8,13	./.:0:.,.	0/0:16:16,0	0/1:24:9,15	0/1:34:15,19	0/0:21:21,0	0/0:12:12,0	1/1:17:0,17	0/1:16:5,11	0/0:30:30,0	1/1:26:0,26	0/1:15:7,8	0/0:22:22,0	0/1:11:8,3	0/1:18:10,8	0/0:15:15,0	0/1:13:5,8
MockRefGenome	100409	.	G	C	.	PASS	AC=26;AF=0.130;DP=1385;AV=17.69;NS=65	GT:DP:AD	0/0:39:39,0	0/1:53:14,39	0/0:21:21,0	0/0:46:46,0	0/0:11:11,0	0/0:18:18,0	0/0:18:18,0	./.:0:.,.	0/0:40:40,0	1/1:13:0,13	1/1:17:0,17	0/0:18:18,0	./.:0:.,.	0/1:19:3,16	0/0:16:16,0	0/1:19:4,15	./.:0:.,.	1/1:20:0,20	./.:0:.,.	0/0:17:17,0	0/0:17:17,0	0/0:15:15,0	0/0:12:12,0	0/0:14:14,0	0/0:20:20,0	0/0:15:15,0	0/0:16:16,0	0/0:24:24,0	0/0:34:34,0	0/0:21:21,0	0/0:12:12,0	0/0:17:17,0	0/1:16:11,5	0/1:30:19,11	0/0:26:26,0	0/0:15:15,0	1/1:22:0,22	0/0:11:11,0	0/0:18:18,0	0/0:14:14,0	0/0:12:12,0
MockRefGenome	100448	.	A	G	.	PASS	AC=19;AF=0.095;DP=1051;AV=17.46;NS=52	GT:DP:AD	1/1:38:0,38	0/0:47:47,0	0/0:20:20,0	0/0:46:46,0	0/1:11:5,6	./.:0:.,.	0/0:18:18,0	./.:0:.,.	0/0:39:39,0	./.:0:.,.	./.:0:.,.	0/0:18:18,0	./.:0:.,.	./.:0:.,.	0/0:16:16,0	./.:0:.,.	0/0:19:19,0	0/0:20:20,0	./.:0:.,.	./.:0:.,.	./.:0:.,.	./.:0:.,.	0/0:12:12,0	0/0:14:14,0	0/0:20:20,0	0/0:15:15,0	./.:0:.,.	0/0:22:22,0	0/1:32:18,14	1/1:21:0,21	0/0:12:12,0	0/0:17:17,0	0/0:15:15,0	0/0:30:30,0	0/1:26:17,9	0/1:15:8,7	./.:0:.,.	0/1:11:8,3	0/1:17:9,8	0/0:14:14,0	0/1:12:5,7
MockRefGenome	100493	.	A	G	.	PASS	AC=57;AF=0.285;DP=1291;AV=16.77;NS=64	GT:DP:AD	1/1:37:0,37	0/0:46:46,0	0/1:20:10,10	0/0:46:46,0	./.:0:.,.	1/1:16:0,16	0/0:18:18,0	0/0:14:14,0	0/1:31:19,12	0/0:13:13,0	0/0:15:15,0	1/1:18:0,18	0/0:19:19,0	0/0:18:18,0	1/1:15:0,15	0/0:20:20,0	0/0:18:18,0	0/0:18:18,0	./.:0:.,.	1/1:17:0,17	1/1:14:0,14	0/1:16:3,13	0/1:9:3,6	0/0:14:14,0	0/0:21:21,0	0/1:12:6,6	0/0:15:15,0	0/1:21:13,8	0/1:33:16,17	0/0:19:19,0	1/1:10:0,10	0/0:17:17,0	1/1:14:0,14	0/1:28:24,4	0/1:24:15,9	0/0:15:15,0	0/0:21:21,0	1/1:10:0,10	1/1:18:0,18	1/1:13:0,13	1/1:12:0,12
MockRefGenome	100526	.	A	G	.	PASS	AC=52;AF=0.260;DP=1335;AV=16.64;NS=70	GT:DP:AD	0/0:37:37,0	0/0:50:50,0	1/1:20:0,20	0/0:46:46,0	0/1:11:6,5	1/1:17:0,17	1/1:18:0,18	0/0:14:14,0	1/1:33:0,33	0/0:13:13,0	0/0:16:16,0	0/1:18:9,9	0/0:19:19,0	0/0:18:18,0	0/1:16:10,6	0/0:20:20,0	0/0:18:18,0	0/0:18:18,0	0/1:8:4,4	0/1:17:11,6	0/1:16:12,4	1/1:17:0,17	./.:0:.,.	1/1:14:0,14	1/1:21:0,21	1/1:13:0,13	1/1:15:0,15	1/1:22:0,22	0/0:33:32,1	0/0:21:21,0	1/1:10:0,10	1/1:17:0,17	0/0:14:14,0	0/1:29:15,14	0/1:24:9,15	0/1:15:7,8	0/0:22:22,0	0/1:10:7,3	0/1:18:10,8	0/0:14:14,0	1/1:13:0,13
MockRefGenome	100528	.	G	T	.	PASS	AC=7;AF=0.035;DP=1339;AV=17.09;NS=67	GT:DP:AD	0/0:38:38,0	0/0:50:50,0	0/0:20:20,0	1/1:46:0,46	0/0:11:11,0	0/0:17:17,0	0/0:18:18,0	0/0:14:14,0	0/0:33:33,0	0/0:14:14,0	0/0:16:16,0	0/0:18:18,0	0/0:19:19,0	0/0:18:18,0	0/0:16:16,0	0/0:20:20,0	./.:0:.,.	0/0:18:18,0	./.:0:.,.	0/0:17:17,0	0/0:16:16,0	0/0:17:17,0	0/0:10:10,0	0/0:14:14,0	0/0:21:21,0	0/0:13:13,0	0/0:15:15,0	0/0:22:22,0	0/0:33:33,0	0/0:21:21,0	0/0:10:10,0	0/0:17:17,0	0/0:14:14,0	0/0:29:29,0	0/0:24:24,0	0/0:15:15,0	0/0:22:22,0	0/0:10:10,0	0/0:18:18,0	0/0:14:14,0	0/0:13:13,0
MockRefGenome	100537	.	C	T	.	PASS	AC=7;AF=0.035;DP=1359;AV=17.33;NS=66	GT:DP:AD	0/0:39:39,0	0/0:53:53,0	0/0:21:21,0	1/1:46:0,46	0/0:11:11,0	0/0:17:17,0	./.:0:.,.	0/0:14:14,0	0/0:34:34,0	0/0:14:14,0	0/0:16:16,0	0/0:18:18,0	0/0:19:19,0	0/0:18:18,0	0/0:16:16,0	0/0:20:20,0	./.:0:.,.	0/0:18:18,0	./.:0:.,.	0/0:17:17,0	0/0:17:17,0	0/0:17:17,0	0/0:11:11,0	0/0:14:14,0	0/0:21:21,0	0/0:14:14,0	0/0:16:16,0	0/0:23:23,0	0/0:33:33,0	0/0:21:21,0	0/0:11:11,0	0/0:17:17,0	0/0:15:15,0	0/0:29:29,0	0/0:24:24,0	0/0:15:15,0	0/0:22:22,0	0/0:10:10,0	0/0:18:18,0	0/0:15:15,0	0/0:13:13,0
MockRefGenome	100562	.	C	T	.	PASS	AC=11;AF=0.055;DP=1402;AV=17.44;NS=72	GT:DP:AD	0/0:39:39,0	0/0:55:55,0	0/0:21:21,0	0/0:46:46,0	0/0:11:11,0	0/0:18:18,0	0/1:18:10,8	0/0:16:16,0	0/1:39:16,23	0/0:14:14,0	0/0:17:17,0	0/0:19:19,0	0/0:19:19,0	0/0:20:20,0	0/0:16:16,0	0/0:21:21,0	0/1:19:15,4	0/0:18:18,0	./.:0:.,.	0/0:17:17,0	0/0:17:17,0	0/0:17:17,0	0/0:12:12,0	1/1:14:0,14	0/0:21:21,0	./.:0:.,.	0/0:16:16,0	0/1:23:8,15	0/0:34:34,0	0/0:22:22,0	0/0:11:11,0	0/0:17:17,0	0/0:16:16,0	0/0:29:29,0	0/0:24:24,0	0/0:15:15,0	0/0:23:23,0	0/0:10:10,0	0/0:18:18,0	0/0:15:15,0	0/0:13:13,0
MockRefGenome	100598	.	A	T	.	PASS	AC=10;AF=0.050;DP=1435;AV=17.76;NS=72	GT:DP:AD	1/1:39:0,39	0/0:56:56,0	0/0:21:21,0	0/0:47:47,0	0/0:11:11,0	0/0:19:19,0	0/0:18:18,0	0/0:16:16,0	0/0:40:40,0	0/0:14:14,0	0/0:17:17,0	0/0:19:19,0	0/0:19:19,0	0/0:20:20,0	0/0:16:16,0	0/0:21:21,0	0/0:20:20,0	0/0:20:20,0	./.:0:.,.	0/0:18:18,0	0/0:18:18,0	0/0:17:17,0	0/0:12:12,0	0/0:14:14,0	0/0:21:21,0	0/0:15:15,0	0/0:16:16,0	0/0:24:24,0	0/0:34:34,0	0/0:22:22,0	0/0:14:14,0	0/0:17:17,0	0/0:16:16,0	0/0:30:30,0	0/0:26:26,0	0/0:15:15,0	0/0:23:23,0	0/0:11:11,0	0/0:18:18,0	0/0:16:16,0	0/0:13:13,0
MockRefGenome	100995	.	C	G	.	PASS	AC=33;AF=0.165;DP=1584;AV=18.76;NS=74	GT:DP:AD	0/1:35:16,19	0/0:72:72,0	0/0:29:29,0	0/1:94:46,48	0/0:13:13,0	0/0:22:22,0	0/0:28:28,0	0/0:12:12,0	1/1:30:0,30	./.:0:.,.	0/0:34:34,0	0/0:15:15,0	0/0:25:25,0	0/0:15:15,0	0/0:18:18,0	0/0:18:18,0	0/0:13:13,0	0/0:12:12,0	0/0:16:16,0	0/0:14:14,0	0/0:20:20,0	0/0:15:15,0	0/1:21:8,13	./.:0:.,.	0/0:22:22,0	0/0:13:13,0	0/0:21:21,0	0/1:18:9,9	./.:0:.,.	./.:0:.,.	./.:0:.,.	0/1:16:4,12	0/1:15:11,4	0/0:13:13,0	0/1:21:9,12	0/0:20:20,0	0/0:18:18,0	0/1:11:8,3	0/1:16:10,6	./.:0:.,.	./.:0:.,.
MockRefGenome	101004	.	A	G	.	PASS	AC=29;AF=0.145;DP=1598;AV=18.76;NS=76	GT:DP:AD	0/0:35:35,0	0/0:72:72,0	0/0:29:29,0	0/1:94:46,48	0/0:13:13,0	0/1:22:15,7	1/1:28:0,28	0/0:12:12,0	0/0:30:30,0	./.:0:.,.	0/0:34:34,0	0/1:15:8,7	0/0:25:25,0	0/0:15:15,0	0/1:18:8,10	0/0:18:18,0	0/0:13:13,0	0/0:12:12,0	./.:0:.,.	0/1:14:6,8	0/1:20:13,7	0/1:15:8,7	0/1:21:15,6	./.:0:.,.	0/1:22:10,12	0/1:13:6,7	0/0:21:21,0	0/0:18:18,0	0/0:16:16,0	0/0:14:14,0	./.:0:.,.	0/0:16:16,0	0/0:15:15,0	0/0:13:13,0	0/0:21:21,0	0/0:20:20,0	0/0:18:18,0	0/0:11:11,0	0/0:16:16,0	0/0:18:18,0	0/0:11:11,0
MockRefGenome	101022	.	C	T	.	PASS	AC=59;AF=0.295;DP=1596;AV=18.80;NS=76	GT:DP:AD	1/1:35:0,35	0/0:72:72,0	0/0:29:29,0	0/1:94:49,45	0/1:13:3,10	0/0:22:22,0	0/0:28:28,0	0/0:12:12,0	1/1:30:0,30	./.:0:.,.	0/0:34:34,0	0/0:15:15,0	0/0:25:25,0	0/0:15:15,0	0/1:18:10,8	0/0:18:18,0	0/0:13:13,0	0/0:12:12,0	0/0:16:16,0	0/0:14:14,0	0/1:20:8,12	0/0:15:15,0	0/1:21:7,14	./.:0:.,.	0/0:22:22,0	0/0:13:13,0	0/0:21:21,0	0/1:18:9,9	0/1:16:7,9	0/1:14:9,5	./.:0:.,.	1/1:16:0,16	0/1:15:6,9	1/1:13:0,13	0/1:21:9,12	0/1:20:8,12	0/0:18:18,0	0/1:11:5,6	0/1:16:7,9	0/1:18:9,9	1/1:11:0,11
MockRefGenome	101040	.	G	A	.	PASS	AC=68;AF=0.340;DP=1594;AV=18.93;NS=72	GT:DP:AD	1/0:35:16,19	1/0:72:41,31	0/0:29:0,29	1/1:94:93,1	1/0:13:10,3	1/0:22:7,15	1/1:28:28,0	./.:0:.,.	0/0:30:0,30	./.:0:.,.	1/0:34:20,14	1/0:15:7,8	1/0:24:11,13	1/0:15:5,10	1/0:18:10,8	1/0:18:10,8	1/0:13:6,7	1/0:12:6,6	./.:0:.,.	1/0:14:8,6	./.:0:.,.	1/0:15:7,8	1/0:21:7,14	0/0:14:0,14	1/0:22:12,10	1/0:13:7,6	0/0:21:0,21	0/0:17:0,17	0/0:16:0,16	1/0:14:9,5	./.:0:.,.	0/0:16:0,16	0/0:15:0,15	0/0:13:0,13	0/0:21:0,21	1/0:20:12,8	1/0:18:4,14	1/0:11:3,8	1/0:16:3,13	1/0:18:7,11	1/0:11:6,5
MockRefGenome	101055	.	A	G	.	PASS	AC=8;AF=0.040;DP=1587;AV=19.09;NS=75	GT:DP:AD	0/0:35:35,0	0/0:72:72,0	0/0:29:29,0	0/0:94:94,0	0/1:13:3,10	0/0:22:22,0	0/0:28:28,0	0/0:12:12,0	0/0:30:30,0	./.:0:.,.	0/0:33:33,0	0/0:15:15,0	0/0:24:24,0	0/0:15:15,0	0/0:18:18,0	0/0:18:18,0	0/0:13:13,0	0/0:12:12,0	0/0:16:16,0	0/0:14:14,0	0/1:20:8,12	0/0:14:14,0	0/0:21:21,0	0/0:14:14,0	0/0:22:22,0	0/0:13:13,0	0/0:21:21,0	0/0:16:16,0	0/0:16:16,0	0/0:14:14,0	./.:0:.,.	0/0:16:16,0	0/0:15:15,0	0/0:13:13,0	0/0:21:21,0	0/1:19:8,11	0/0:18:18,0	0/0:10:10,0	0/0:15:15,0	0/0:18:18,0	0/0:11:11,0
MockRefGenome	101067	.	T	C	.	PASS	AC=9;AF=0.045;DP=1582;AV=18.75;NS=77	GT:DP:AD	0/1:35:16,19	0/0:72:72,0	0/0:29:29,0	0/0:94:94,0	0/0:13:13,0	0/0:21:21,0	0/0:28:28,0	0/0:12:12,0	1/1:30:0,30	./.:0:.,.	0/0:32:32,0	0/0:15:15,0	0/0:24:24,0	0/0:15:15,0	0/0:18:18,0	0/0:18:18,0	0/0:13:13,0	0/0:12:12,0	0/0:16:16,0	0/0:14:14,0	0/0:20:20,0	0/0:14:14,0	0/1:21:8,13	0/0:14:14,0	0/0:22:22,0	0/0:13:13,0	0/0:21:21,0	0/1:16:8,8	0/0:16:16,0	0/0:14:14,0	./.:0:.,.	0/0:16:16,0	0/1:15:11,4	0/0:13:13,0	0/0:21:21,0	0/0:19:19,0	0/0:18:18,0	0/0:10:10,0	0/0:15:15,0	0/0:18:18,0	0/0:11:11,0
MockRefGenome	101100	.	C	T	.	PASS	AC=31;AF=0.155;DP=1565;AV=18.83;NS=70	GT:DP:AD	0/1:35:16,19	0/1:71:31,40	0/0:28:28,0	0/0:93:93,0	0/0:13:13,0	0/0:21:21,0	0/0:28:28,0	0/1:12:6,6	./.:0:.,.	./.:0:.,.	0/1:32:14,18	0/0:15:15,0	0/1:24:7,17	0/1:15:10,5	0/0:18:18,0	0/1:18:8,10	0/1:12:6,6	0/1:12:6,6	0/0:15:15,0	0/0:14:14,0	0/0:20:20,0	0/0:14:14,0	0/1:21:8,13	0/0:14:14,0	0/0:21:21,0	0/0:13:13,0	0/0:19:19,0	0/1:15:7,8	0/0:14:14,0	0/0:14:14,0	./.:0:.,.	0/1:16:4,12	./.:0:.,.	0/1:13:6,7	0/1:21:9,12	0/0:19:19,0	0/1:18:14,4	./.:0:.,.	0/1:15:9,6	./.:0:.,.	./.:0:.,.
MockRefGenome	101148	.	G	A	.	PASS	AC=10;AF=0.050;DP=1510;AV=18.87;NS=67	GT:DP:AD	0/0:35:35,0	0/1:63:49,14	0/0:29:29,0	0/0:92:92,0	0/0:14:14,0	0/0:20:20,0	0/0:27:27,0	0/0:11:11,0	0/0:29:29,0	./.:0:.,.	0/0:32:32,0	0/0:13:13,0	0/0:21:21,0	0/0:15:15,0	0/0:16:16,0	0/0:18:18,0	./.:0:.,.	./.:0:.,.	0/0:14:14,0	0/0:13:13,0	0/0:20:20,0	0/0:15:15,0	0/0:21:21,0	./.:0:.,.	0/0:18:18,0	0/0:12:12,0	0/0:21:21,0	0/0:17:17,0	0/0:14:14,0	0/0:14:14,0	0/0:16:16,0	0/0:15:15,0	./.:0:.,.	0/1:13:6,7	0/0:20:20,0	0/0:19:19,0	0/1:18:12,6	0/0:11:11,0	0/0:13:13,0	0/0:17:17,0	0/0:11:11,0
MockRefGenome	101149	.	C	T	.	PASS	AC=41;AF=0.205;DP=1512;AV=18.36;NS=72	GT:DP:AD	0/0:35:35,0	0/1:64:51,13	0/0:29:29,0	0/1:92:45,47	1/1:14:0,14	0/0:20:20,0	0/0:27:26,1	0/1:11:6,5	0/0:29:29,0	./.:0:.,.	0/1:32:20,12	0/0:13:13,0	0/1:21:15,6	0/1:15:5,10	0/0:16:16,0	0/1:18:10,8	./.:0:.,.	0/1:11:7,4	0/0:14:14,0	0/0:13:13,0	0/1:20:8,12	0/0:15:15,0	0/0:21:21,0	0/0:13:13,0	0/0:18:18,0	0/0:12:12,0	0/0:21:21,0	0/0:17:17,0	1/1:14:0,14	1/1:14:0,14	0/0:16:16,0	0/0:15:15,0	0/0:14:14,0	0/0:13:13,0	0/1:20:12,8	1/1:19:0,19	0/1:18:10,8	0/0:11:11,0	0/0:13:13,0	0/0:17:17,0	0/0:11:11,0
MockRefGenome	101152	.	T	C	.	PASS	AC=32;AF=0.160;DP=1517;AV=18.56;NS=70	GT:DP:AD	0/0:35:35,0	0/1:64:50,14	0/0:29:29,0	0/1:92:45,47	0/0:14:14,0	0/1:20:14,6	1/1:27:0,27	0/0:11:11,0	0/0:29:29,0	./.:0:.,.	0/0:32:32,0	0/1:13:6,7	0/0:21:21,0	0/0:15:15,0	0/1:16:7,9	0/0:18:18,0	./.:0:.,.	./.:0:.,.	./.:0:.,.	0/1:13:6,7	0/1:20:13,7	0/1:15:8,7	0/1:21:15,6	./.:0:.,.	0/1:18:9,9	0/1:13:6,7	0/0:21:21,0	0/0:17:17,0	0/0:15:15,0	0/0:14:14,0	0/0:17:17,0	0/0:15:15,0	0/0:14:14,0	0/0:13:13,0	0/0:20:20,0	0/0:19:19,0	0/1:18:12,6	0/0:11:11,0	0/0:13:13,0	0/0:17:17,0	0/0:11:11,0
MockRefGenome	101185	.	G	A	.	PASS	AC=32;AF=0.160;DP=1552;AV=18.36;NS=76	GT:DP:AD	0/1:35:19,16	0/0:67:67,0	0/0:29:29,0	0/1:94:49,45	0/0:14:14,0	0/0:21:21,0	0/0:27:27,0	0/0:11:11,0	0/0:29:29,0	./.:0:.,.	0/0:33:33,0	0/0:13:13,0	0/0:22:22,0	0/0:15:15,0	0/0:18:18,0	0/0:18:18,0	0/0:11:11,0	0/0:11:11,0	./.:0:.,.	0/0:13:13,0	0/0:20:20,0	0/0:15:15,0	0/0:21:20,1	0/0:14:14,0	0/0:19:19,0	0/0:13:13,0	0/0:21:21,0	0/0:18:18,0	0/0:15:15,0	0/0:14:14,0	0/0:17:17,0	0/0:16:16,0	0/0:15:15,0	0/0:13:13,0	0/0:20:20,0	0/0:19:19,0	0/0:18:18,0	0/1:11:8,3	0/1:13:10,3	0/1:17:10,7	0/1:11:5,6
MockRefGenome	101248	.	C	A	.	PASS	AC=32;AF=0.160;DP=1602;AV=18.50;NS=80	GT:DP:AD	0/1:35:19,16	0/0:71:71,0	0/0:29:29,0	0/1:94:49,45	0/0:14:14,0	0/0:22:22,0	0/0:28:28,0	0/0:12:12,0	0/0:30:30,0	./.:0:.,.	0/0:34:34,0	0/0:15:15,0	0/0:25:25,0	0/0:15:15,0	0/0:18:18,0	0/0:18:18,0	0/0:13:13,0	0/0:12:12,0	0/0:16:16,0	0/0:14:14,0	0/0:20:20,0	0/0:15:15,0	0/0:21:20,1	0/0:15:15,0	0/0:22:22,0	0/0:13:13,0	0/0:21:21,0	0/0:18:18,0	0/0:16:16,0	0/0:14:14,0	0/0:17:17,0	0/0:16:16,0	0/0:15:15,0	0/0:13:13,0	0/0:20:20,0	0/0:20:20,0	0/0:18:18,0	0/1:11:8,3	0/1:15:12,3	0/1:17:10,7	0/1:11:5,6
MockRefGenome	101269	.	G	A	.	PASS	AC=11;AF=0.055;DP=1609;AV=18.91;NS=77	GT:DP:AD	0/1:35:16,19	0/0:72:72,0	0/0:29:29,0	0/0:94:94,0	0/0:14:14,0	0/0:22:22,0	0/0:28:28,0	0/0:12:12,0	1/1:30:0,30	./.:0:.,.	0/0:34:34,0	0/0:15:15,0	0/0:25:25,0	0/0:15:15,0	0/0:18:18,0	0/0:18:18,0	0/0:13:13,0	0/0:12:12,0	0/0:16:16,0	0/0:14:14,0	0/0:20:20,0	0/0:15:15,0	0/0:21:21,0	0/1:15:4,11	0/0:22:22,0	0/0:13:13,0	0/0:21:21,0	0/1:18:9,9	0/0:16:16,0	0/0:14:14,0	0/1:17:7,10	0/0:16:16,0	0/1:15:11,4	0/0:13:13,0	0/0:21:21,0	0/0:20:20,0	0/0:18:18,0	0/0:11:11,0	0/0:16:16,0	0/0:18:18,0	0/0:11:11,0
MockRefGenome	101281	.	G	A	.	PASS	AC=32;AF=0.160;DP=1606;AV=18.43;NS=81	GT:DP:AD	0/1:35:19,16	0/0:72:72,0	0/0:29:29,0	0/1:94:49,45	0/0:14:14,0	0/0:22:22,0	0/0:28:28,0	0/0:12:12,0	0/0:30:30,0	./.:0:.,.	0/0:34:34,0	0/0:15:15,0	0/0:25:25,0	0/0:15:15,0	0/0:18:18,0	0/0:18:18,0	0/0:13:13,0	0/0:12:12,0	0/0:16:16,0	0/0:13:13,0	0/0:20:20,0	0/0:15:15,0	0/0:21:20,1	0/0:15:15,0	0/0:22:22,0	0/0:13:13,0	0/0:21:21,0	0/0:18:18,0	0/0:16:16,0	0/0:14:14,0	0/0:17:17,0	0/0:16:16,0	0/0:15:15,0	0/0:13:13,0	0/0:21:21,0	0/0:20:20,0	0/0:18:18,0	0/1:11:8,3	0/1:16:13,3	0/1:18:11,7	0/1:11:5,6
MockRefGenome	101327	.	G	A	.	PASS	AC=18;AF=0.090;DP=1087;AV=16.08;NS=48	GT:DP:AD	0/0:28:28,0	0/0:31:31,0	0/0:25:25,0	0/0:61:60,1	0/0:16:16,0	0/0:12:12,0	0/1:18:5,13	0/0:12:12,0	0/1:32:15,17	./.:0:.,.	./.:0:.,.	0/0:18:18,0	0/0:18:18,0	0/0:15:15,0	./.:0:.,.	0/0:12:12,0	0/0:24:24,0	0/0:12:12,0	./.:0:.,.	./.:0:.,.	0/1:11:8,3	./.:0:.,.	0/1:7:4,3	0/1:8:4,4	./.:0:.,.	0/1:13:8,5	./.:0:.,.	0/1:16:8,8	0/0:14:14,0	0/0:11:11,0	0/0:13:13,0	./.:0:.,.	0/1:14:11,3	0/0:18:18,0	./.:0:.,.	./.:0:.,.	0/0:19:19,0	0/1:11:7,4	./.:0:.,.	./.:0:.,.	./.:0:.,.
MockRefGenome	101381	.	A	T	.	PASS	AC=26;AF=0.130;DP=1074;AV=16.36;NS=45	GT:DP:AD	0/1:28:17,11	0/0:31:31,0	0/0:25:25,0	1/1:61:1,60	0/0:16:16,0	0/0:12:12,0	0/0:18:18,0	0/0:12:12,0	0/0:32:32,0	./.:0:.,.	./.:0:.,.	0/0:18:18,0	0/0:18:18,0	0/0:15:15,0	./.:0:.,.	0/0:12:12,0	0/0:24:24,0	0/0:11:11,0	./.:0:.,.	./.:0:.,.	0/0:11:11,0	./.:0:.,.	./.:0:.,.	./.:0:.,.	./.:0:.,.	0/0:13:13,0	./.:0:.,.	0/0:16:16,0	0/0:14:14,0	0/0:11:11,0	0/0:13:13,0	./.:0:.,.	0/0:13:13,0	0/0:16:16,0	./.:0:.,.	0/0:14:14,0	0/0:18:18,0	0/1:11:7,4	0/1:7:3,4	./.:0:.,.	./.:0:.,.
MockRefGenome	101399	.	A	G	.	PASS	AC=35;AF=0.175;DP=1058;AV=15.80;NS=45	GT:DP:AD	0/0:28:28,0	0/1:31:13,18	0/0:25:25,0	0/0:61:61,0	0/0:16:16,0	0/1:12:8,4	0/0:18:18,0	1/1:12:0,12	0/0:32:32,0	./.:0:.,.	./.:0:.,.	1/1:18:0,18	0/1:18:5,13	1/1:15:0,15	./.:0:.,.	0/1:12:3,9	1/1:24:1,23	1/1:11:0,11	./.:0:.,.	./.:0:.,.	0/0:10:10,0	./.:0:.,.	./.:0:.,.	0/1:8:4,4	./.:0:.,.	1/1:12:0,12	./.:0:.,.	0/1:16:8,8	0/1:13:6,7	0/0:11:11,0	0/0:13:13,0	./.:0:.,.	1/1:13:0,13	1/1:16:0,16	./.:0:.,.	0/0:14:14,0	./.:0:.,.	0/1:11:6,5	./.:0:.,.	./.:0:.,.	./.:0:.,.
MockRefGenome	101409	.	A	T	.	PASS	AC=19;AF=0.095;DP=1054;AV=15.83;NS=47	GT:DP:AD	0/0:28:28,0	0/0:31:31,0	1/1:25:0,25	0/0:61:61,0	0/0:16:16,0	0/1:12:8,4	0/1:18:5,13	0/0:12:12,0	0/1:32:15,17	./.:0:.,.	./.:0:.,.	0/0:18:18,0	0/0:18:18,0	0/0:15:15,0	./.:0:.,.	0/0:12:12,0	0/0:24:24,0	0/0:10:10,0	./.:0:.,.	./.:0:.,.	1/1:10:0,10	./.:0:.,.	0/1:7:4,3	0/1:8:4,4	./.:0:.,.	0/0:12:12,0	./.:0:.,.	0/1:16:8,8	0/0:13:13,0	0/0:11:11,0	1/1:13:0,13	./.:0:.,.	0/1:13:6,7	0/0:16:16,0	./.:0:.,.	0/0:14:14,0	0/0:18:18,0	0/0:11:11,0	./.:0:.,.	./.:0:.,.	./.:0:.,.
MockRefGenome	101414	.	A	G	.	PASS	AC=42;AF=0.210;DP=1039;AV=15.42;NS=48	GT:DP:AD	0/1:28:12,16	1/1:31:0,31	0/0:25:25,0	0/0:60:60,0	0/0:16:16,0	0/1:12:4,8	0/0:18:18,0	1/1:12:0,12	0/0:32:32,0	./.:0:.,.	./.:0:.,.	0/1:18:10,8	1/1:18:0,18	1/1:15:0,15	./.:0:.,.	1/1:12:0,12	1/1:24:0,24	./.:0:.,.	./.:0:.,.	./.:0:.,.	0/0:10:10,0	./.:0:.,.	0/1:7:3,4	./.:0:.,.	./.:0:.,.	0/1:12:4,8	./.:0:.,.	0/0:15:15,0	1/1:13:0,13	1/1:11:0,11	0/0:13:13,0	./.:0:.,.	0/1:13:9,4	0/1:16:10,6	./.:0:.,.	1/1:14:0,14	1/1:12:0,12	0/0:11:11,0	./.:0:.,.	./.:0:.,.	./.:0:.,.
MockRefGenome	101427	.	T	C	.	PASS	AC=17;AF=0.085;DP=1047;AV=15.60;NS=48	GT:DP:AD	0/0:28:28,0	0/0:31:31,0	1/1:25:0,25	0/0:60:60,0	0/0:16:16,0	0/0:12:12,0	0/0:18:18,0	0/0:12:12,0	0/1:32:17,15	./.:0:.,.	./.:0:.,.	0/1:18:8,10	0/0:18:18,0	0/0:15:15,0	./.:0:.,.	0/0:12:12,0	0/0:24:24,0	0/0:10:10,0	./.:0:.,.	./.:0:.,.	1/1:10:0,10	./.:0:.,.	0/1:7:4,3	0/1:8:4,4	./.:0:.,.	0/1:12:8,4	./.:0:.,.	0/1:16:8,8	0/0:13:13,0	0/0:11:11,0	./.:0:.,.	./.:0:.,.	0/0:12:12,0	0/0:16:16,0	./.:0:.,.	0/0:14:14,0	0/0:18:18,0	0/1:11:7,4	0/1:6:3,3	./.:0:.,.	./.:0:.,.
MockRefGenome	101477	.	C	T	.	PASS	AC=37;AF=0.185;DP=1117;AV=15.83;NS=52	GT:DP:AD	0/1:24:14,10	0/0:39:39,0	0/0:22:22,0	0/1:78:28,50	1/1:13:0,13	./.:0:.,.	0/1:14:11,3	0/0:11:11,0	0/0:29:29,0	./.:0:.,.	./.:0:.,.	0/0:15:15,0	0/0:15:15,0	0/0:13:13,0	./.:0:.,.	./.:0:.,.	0/0:20:20,0	0/0:11:11,0	./.:0:.,.	./.:0:.,.	./.:0:.,.	./.:0:.,.	./.:0:.,.	./.:0:.,.	./.:0:.,.	0/1:12:4,8	./.:0:.,.	0/0:11:11,0	0/0:10:10,0	0/0:10:10,0	0/0:13:13,0	./.:0:.,.	./.:0:.,.	0/0:16:16,0	./.:0:.,.	0/1:12:7,5	0/0:18:18,0	0/1:10:3,7	0/1:6:3,3	./.:0:.,.	./.:0:.,.
MockRefGenome	101528	.	A	G	.	PASS	AC=21;AF=0.105;DP=1226;AV=16.65;NS=57	GT:DP:AD	0/0:27:27,0	0/1:41:23,18	0/0:24:24,0	0/0:84:84,0	0/0:14:14,0	0/0:11:11,0	0/0:18:18,0	0/1:11:5,6	0/0:30:30,0	./.:0:.,.	0/1:10:7,3	0/0:16:16,0	./.:0:.,.	0/1:13:9,4	./.:0:.,.	0/1:11:3,8	1/1:21:0,21	./.:0:.,.	./.:0:.,.	./.:0:.,.	0/0:10:10,0	./.:0:.,.	./.:0:.,.	./.:0:.,.	./.:0:.,.	0/0:13:13,0	./.:0:.,.	0/0:12:12,0	0/0:12:12,0	0/0:10:10,0	0/0:13:13,0	./.:0:.,.	0/0:12:12,0	0/0:16:16,0	./.:0:.,.	0/0:14:14,0	0/1:18:9,9	0/0:10:10,0	./.:0:.,.	./.:0:.,.	./.:0:.,.
MockRefGenome	101552	.	G	C	.	PASS	AC=64;AF=0.320;DP=1257;AV=16.35;NS=63	GT:DP:AD	1/0:27:11,16	1/0:44:15,29	0/0:25:0,25	1/1:88:88,0	0/0:14:0,14	1/1:11:11,0	1/0:18:5,13	0/0:12:0,12	0/0:31:0,31	./.:0:.,.	1/0:11:5,6	1/0:16:8,8	0/0:18:0,18	0/0:11:0,11	./.:0:.,.	0/0:12:0,12	0/0:21:0,21	0/0:12:0,12	./.:0:.,.	./.:0:.,.	./.:0:.,.	./.:0:.,.	./.:0:.,.	1/0:8:4,4	./.:0:.,.	0/0:13:0,13	./.:0:.,.	1/0:14:7,7	0/0:12:0,12	0/0:11:0,11	0/0:13:0,13	./.:0:.,.	1/0:12:6,6	0/0:17:0,17	./.:0:.,.	0/0:14:0,14	0/0:18:0,18	1/0:10:4,6	1/0:7:4,3	1/0:9:6,3	./.:0:.,.
MockRefGenome	101561	.	G	A	.	PASS	AC=34;AF=0.170;DP=1274;AV=17.25;NS=59	GT:DP:AD	0/1:27:16,11	0/0:46:46,0	0/0:25:25,0	0/1:91:32,59	0/0:15:15,0	0/0:11:11,0	0/0:18:18,0	0/0:12:12,0	0/0:31:31,0	./.:0:.,.	./.:0:.,.	0/0:16:16,0	0/0:18:18,0	0/0:15:15,0	./.:0:.,.	0/0:12:12,0	0/0:23:23,0	0/0:12:12,0	./.:0:.,.	./.:0:.,.	0/0:10:10,0	./.:0:.,.	./.:0:.,.	./.:0:.,.	./.:0:.,.	0/0:13:13,0	./.:0:.,.	0/0:14:14,0	0/0:12:12,0	0/0:11:11,0	0/0:13:13,0	./.:0:.,.	0/0:12:12,0	0/0:17:17,0	./.:0:.,.	0/0:14:14,0	0/0:18:18,0	0/1:10:6,4	0/1:7:3,4	./.:0:.,.	./.:0:.,.
MockRefGenome	101642	.	T	G	.	PASS	AC=8;AF=0.040;DP=1500;AV=17.93;NS=73	GT:DP:AD	0/0:18:18,0	0/0:47:47,0	0/1:30:14,16	0/0:37:36,1	0/0:23:23,0	0/0:21:21,0	0/0:15:15,0	0/0:15:15,0	0/0:60:60,0	0/0:17:17,0	0/0:23:23,0	0/1:16:7,9	0/0:17:17,0	0/0:15:15,0	0/0:15:15,0	0/0:16:16,0	0/0:20:20,0	0/0:22:22,0	./.:0:.,.	./.:0:.,.	0/0:12:12,0	./.:0:.,.	0/1:14:11,3	0/0:11:11,0	0/0:18:18,0	0/0:15:15,0	0/0:18:18,0	0/0:23:23,0	0/1:19:7,12	0/1:15:5,10	0/1:20:7,13	0/0:11:11,0	0/0:18:18,0	0/0:20:20,0	0/0:16:16,0	1/1:16:0,16	0/0:18:18,0	0/0:11:11,0	0/0:15:15,0	0/0:20:20,0	0/0:12:12,0
MockRefGenome	101646	.	C	T	.	PASS	AC=9;AF=0.045;DP=1500;AV=17.82;NS=74	GT:DP:AD	0/0:18:18,0	0/0:47:47,0	0/0:30:30,0	0/0:37:37,0	0/0:23:23,0	0/0:21:21,0	0/0:15:15,0	0/0:15:15,0	0/0:60:60,0	0/0:17:17,0	0/0:23:23,0	0/0:16:16,0	0/0:17:17,0	0/0:15:15,0	0/0:15:15,0	0/0:16:16,0	0/0:20:20,0	0/0:22:22,0	./.:0:.,.	./.:0:.,.	0/0:12:12,0	./.:0:.,.	0/0:14:14,0	0/0:11:11,0	0/0:18:18,0	0/0:15:15,0	0/0:18:18,0	0/0:23:23,0	0/0:19:19,0	0/0:15:15,0	0/0:20:20,0	0/0:11:11,0	0/0:18:18,0	0/0:20:20,0	0/0:16:16,0	0/0:16:16,0	0/0:18:18,0	0/1:11:6,5	0/1:15:3,12	0/0:20:20,0	./.:0:.,.
MockRefGenome	101653	.	G	A	.	PASS	AC=14;AF=0.070;DP=1497;AV=17.78;NS=74	GT:DP:AD	0/0:18:18,0	0/0:47:47,0	0/0:30:30,0	0/0:37:37,0	0/0:22:22,0	0/0:21:21,0	0/0:15:15,0	0/0:15:15,0	0/0:60:60,0	0/0:17:17,0	0/1:23:16,7	0/0:16:16,0	0/1:17:12,5	0/1:15:12,3	0/0:15:15,0	0/1:16:12,4	0/1:20:15,5	0/1:22:14,8	./.:0:.,.	./.:0:.,.	0/0:12:12,0	./.:0:.,.	0/0:14:14,0	0/0:11:11,0	0/0:18:18,0	0/0:15:15,0	0/0:18:18,0	0/0:23:23,0	0/0:19:19,0	0/0:15:15,0	0/0:20:20,0	0/1:11:7,4	0/0:18:18,0	0/0:19:19,0	0/1:16:8,8	0/0:16:16,0	0/1:18:13,5	0/0:11:11,0	0/0:15:15,0	0/0:20:20,0	0/0:12:12,0
MockRefGenome	101755	.	C	T	.	PASS	AC=14;AF=0.070;DP=1465;AV=17.60;NS=72	GT:DP:AD	0/0:18:18,0	0/0:47:47,0	0/1:30:16,14	0/0:36:36,0	0/0:23:23,0	0/0:21:21,0	0/0:14:14,0	0/0:14:14,0	0/0:59:59,0	0/0:15:15,0	0/0:23:23,0	0/1:16:9,7	0/0:15:15,0	0/0:14:14,0	0/0:14:14,0	0/0:16:16,0	0/0:19:19,0	0/0:21:21,0	./.:0:.,.	./.:0:.,.	0/0:12:12,0	./.:0:.,.	0/0:14:14,0	0/1:11:7,4	0/0:17:17,0	0/1:14:8,6	0/0:18:18,0	0/1:22:14,8	0/0:19:19,0	0/0:14:14,0	0/1:19:13,6	0/1:11:4,7	0/0:18:18,0	0/0:20:20,0	0/0:16:16,0	0/0:16:16,0	0/0:16:16,0	0/0:10:10,0	0/0:15:15,0	0/1:18:8,10	0/1:12:4,8
MockRefGenome	101767	.	G	A	.	PASS	AC=15;AF=0.075;DP=1456;AV=17.59;NS=70	GT:DP:AD	0/0:18:18,0	0/0:47:47,0	0/1:30:16,14	0/0:36:36,0	0/0:21:21,0	0/0:21:21,0	0/0:14:14,0	0/0:14:14,0	0/0:58:58,0	0/0:15:15,0	0/0:23:23,0	0/1:16:9,7	0/0:15:15,0	0/0:14:14,0	0/0:14:14,0	0/1:16:13,3	0/0:19:19,0	0/0:21:21,0	./.:0:.,.	./.:0:.,.	0/0:11:11,0	./.:0:.,.	0/0:14:14,0	0/1:11:7,4	0/0:17:17,0	0/1:14:8,6	0/0:18:18,0	0/1:22:14,8	./.:0:.,.	0/0:14:14,0	0/1:19:13,6	0/1:11:4,7	0/0:18:18,0	0/0:20:20,0	0/0:16:16,0	0/0:16:16,0	0/0:16:16,0	0/0:10:10,0	0/0:15:15,0	0/1:18:8,10	0/1:11:4,7
MockRefGenome	101871	.	C	T	.	PASS	AC=40;AF=0.200;DP=1428;AV=16.60;NS=72	GT:DP:AD	./.:0:.,.	0/0:47:47,0	0/0:31:31,0	0/1:31:25,6	0/1:24:13,11	0/0:20:20,0	0/0:14:14,0	0/0:15:15,0	0/0:57:57,0	./.:0:.,.	0/0:22:22,0	0/0:15:15,0	0/1:16:12,4	0/0:13:13,0	0/0:15:15,0	0/0:16:16,0	0/1:19:14,5	0/1:22:18,4	./.:0:.,.	./.:0:.,.	0/0:11:11,0	./.:0:.,.	0/0:14:14,0	0/0:11:11,0	0/0:17:17,0	0/0:15:15,0	0/0:18:18,0	0/0:22:22,0	0/0:20:20,0	0/0:15:15,0	0/0:19:19,0	0/0:11:11,0	0/0:15:15,0	0/0:19:19,0	0/0:17:17,0	0/0:15:15,0	0/0:17:17,0	0/1:11:4,7	0/1:14:4,10	0/1:20:17,3	0/1:12:8,4
MockRefGenome	101874	.	C	T	.	PASS	AC=12;AF=0.060;DP=1435;AV=17.10;NS=73	GT:DP:AD	0/0:17:17,0	0/0:47:47,0	0/0:31:31,0	0/0:31:31,0	0/0:24:24,0	0/1:20:9,11	0/0:14:14,0	0/0:15:15,0	0/0:58:58,0	./.:0:.,.	0/0:22:22,0	0/0:15:15,0	0/0:16:16,0	0/0:13:13,0	0/1:15:9,6	0/0:16:16,0	0/0:19:19,0	0/0:22:22,0	./.:0:.,.	./.:0:.,.	0/1:11:4,7	0/1:9:6,3	0/1:14:6,8	0/1:11:4,7	0/1:17:5,12	0/0:15:15,0	0/0:18:18,0	0/0:23:23,0	0/0:20:20,0	0/1:15:10,5	0/0:19:19,0	0/0:11:11,0	0/0:17:17,0	0/0:20:20,0	0/0:17:17,0	0/0:15:15,0	0/0:17:17,0	0/0:11:11,0	0/0:14:14,0	0/0:20:20,0	0/0:12:12,0
MockRefGenome	101898	.	C	T	.	PASS	AC=10;AF=0.050;DP=1455;AV=17.45;NS=74	GT:DP:AD	0/0:17:17,0	0/0:47:47,0	0/0:31:31,0	0/0:31:31,0	0/0:24:24,0	0/0:20:20,0	0/0:14:14,0	0/0:15:15,0	0/0:58:58,0	./.:0:.,.	0/0:22:22,0	0/0:15:15,0	0/0:16:16,0	0/0:14:14,0	0/0:15:15,0	0/0:16:16,0	0/0:19:19,0	0/1:22:14,8	./.:0:.,.	./.:0:.,.	0/0:11:11,0	./.:0:.,.	0/0:15:15,0	0/0:11:11,0	0/0:18:18,0	0/0:15:15,0	0/0:18:18,0	0/0:24:24,0	0/0:20:20,0	0/0:15:15,0	0/0:19:19,0	0/0:11:11,0	0/0:17:17,0	0/0:20:20,0	0/0:17:17,0	0/0:15:15,0	0/0:17:17,0	0/1:11:6,5	0/1:14:4,10	0/0:20:20,0	./.:0:.,.
MockRefGenome	102679	.	G	A	.	PASS	AC=14;AF=0.070;DP=929;AV=14.87;NS=38	GT:DP:AD	0/1:31:20,11	0/0:36:36,0	./.:0:.,.	0/0:33:33,0	0/0:11:11,0	./.:0:.,.	0/0:18:18,0	0/0:10:10,0	0/0:30:30,0	0/0:16:16,0	0/0:17:17,0	./.:0:.,.	./.:0:.,.	./.:0:.,.	./.:0:.,.	./.:0:.,.	0/0:17:17,0	0/0:14:14,0	./.:0:.,.	./.:0:.,.	./.:0:.,.	./.:0:.,.	./.:0:.,.	./.:0:.,.	./.:0:.,.	./.:0:.,.	./.:0:.,.	0/0:22:22,0	0/0:13:13,0	0/0:12:12,0	./.:0:.,.	0/0:12:12,0	./.:0:.,.	0/0:11:11,0	0/0:10:10,0	0/0:11:11,0	0/0:11:11,0	./.:0:.,.	0/1:8:5,3	0/0:11:11,0	0/1:11:7,4
MockRefGenome	102694	.	C	T	.	PASS	AC=26;AF=0.130;DP=918;AV=13.95;NS=41	GT:DP:AD	0/1:31:20,11	0/0:36:36,0	./.:0:.,.	0/0:33:33,0	0/1:11:6,5	./.:0:.,.	./.:0:.,.	0/0:10:10,0	0/1:30:14,16	0/0:16:16,0	0/0:17:17,0	./.:0:.,.	./.:0:.,.	./.:0:.,.	./.:0:.,.	./.:0:.,.	0/0:17:17,0	0/0:12:12,0	./.:0:.,.	./.:0:.,.	./.:0:.,.	0/1:9:6,3	./.:0:.,.	./.:0:.,.	./.:0:.,.	./.:0:.,.	./.:0:.,.	0/1:22:14,8	0/0:13:13,0	0/1:12:8,4	./.:0:.,.	1/1:12:0,12	0/1:8:5,3	0/1:11:4,7	0/0:10:10,0	0/0:11:11,0	0/0:11:11,0	./.:0:.,.	0/1:8:3,5	0/0:10:10,0	0/1:11:7,4
MockRefGenome	102733	.	C	T	.	PASS	AC=14;AF=0.070;DP=878;AV=14.88;NS=33	GT:DP:AD	0/1:29:18,11	0/0:36:36,0	./.:0:.,.	0/0:31:31,0	./.:0:.,.	./.:0:.,.	0/0:18:18,0	./.:0:.,.	0/0:28:28,0	0/0:15:15,0	0/0:16:16,0	./.:0:.,.	./.:0:.,.	./.:0:.,.	./.:0:.,.	./.:0:.,.	0/0:17:17,0	0/0:12:12,0	./.:0:.,.	./.:0:.,.	./.:0:.,.	./.:0:.,.	./.:0:.,.	./.:0:.,.	./.:0:.,.	./.:0:.,.	./.:0:.,.	0/0:21:21,0	0/0:13:13,0	0/0:11:11,0	./.:0:.,.	0/0:12:12,0	./.:0:.,.	0/0:11:11,0	./.:0:.,.	0/0:11:11,0	0/0:11:11,0	./.:0:.,.	0/1:8:5,3	./.:0:.,.	0/1:11:7,4
MockRefGenome	102742	.	T	G	.	PASS	AC=13;AF=0.065;DP=873;AV=14.44;NS=34	GT:DP:AD	0/0:29:29,0	0/0:36:36,0	./.:0:.,.	0/0:31:31,0	0/1:9:6,3	./.:0:.,.	./.:0:.,.	./.:0:.,.	0/1:28:12,16	0/0:15:15,0	0/0:16:16,0	./.:0:.,.	./.:0:.,.	./.:0:.,.	./.:0:.,.	./.:0:.,.	0/0:16:16,0	0/0:12:12,0	./.:0:.,.	./.:0:.,.	./.:0:.,.	0/1:9:6,3	./.:0:.,.	./.:0:.,.	./.:0:.,.	./.:0:.,.	./.:0:.,.	0/1:21:13,8	0/0:13:13,0	0/1:11:7,4	./.:0:.,.	0/1:12:5,7	0/1:8:5,3	0/1:11:4,7	./.:0:.,.	0/0:11:11,0	0/0:11:11,0	./.:0:.,.	./.:0:.,.	./.:0:.,.	0/0:11:11,0
MockRefGenome	102753	.	A	C	.	PASS	AC=14;AF=0.070;DP=859;AV=14.62;NS=32	GT:DP:AD	0/1:28:18,10	0/0:35:35,0	./.:0:.,.	0/0:29:29,0	./.:0:.,.	./.:0:.,.	0/0:18:18,0	./.:0:.,.	0/0:28:28,0	0/0:15:15,0	0/0:16:16,0	./.:0:.,.	./.:0:.,.	./.:0:.,.	./.:0:.,.	./.:0:.,.	0/0:14:14,0	0/0:12:12,0	./.:0:.,.	./.:0:.,.	./.:0:.,.	./.:0:.,.	./.:0:.,.	./.:0:.,.	./.:0:.,.	./.:0:.,.	./.:0:.,.	0/0:21:21,0	0/0:12:12,0	0/0:10:10,0	./.:0:.,.	0/0:12:12,0	./.:0:.,.	0/0:11:11,0	./.:0:.,.	0/0:11:11,0	0/0:11:11,0	./.:0:.,.	0/1:8:5,3	./.:0:.,.	0/1:11:7,4
MockRefGenome	102804	.	T	C	.	PASS	AC=6;AF=0.030;DP=973;AV=15.75;NS=40	GT:DP:AD	0/0:29:29,0	0/0:37:37,0	./.:0:.,.	0/0:56:56,0	0/0:10:10,0	./.:0:.,.	1/1:17:0,17	0/0:11:11,0	0/0:27:27,0	0/0:16:16,0	0/0:16:16,0	./.:0:.,.	./.:0:.,.	./.:0:.,.	./.:0:.,.	./.:0:.,.	0/0:15:15,0	0/0:13:13,0	./.:0:.,.	./.:0:.,.	./.:0:.,.	./.:0:.,.	./.:0:.,.	./.:0:.,.	./.:0:.,.	./.:0:.,.	./.:0:.,.	0/0:20:20,0	0/0:13:13,0	0/0:11:11,0	./.:0:.,.	0/0:11:11,0	./.:0:.,.	0/1:11:5,6	0/0:10:10,0	0/0:11:11,0	0/0:11:11,0	0/1:8:3,5	./.:0:.,.	0/1:13:10,3	0/0:10:10,0
MockRefGenome	102825	.	T	C	.	PASS	AC=26;AF=0.130;DP=988;AV=14.65;NS=46	GT:DP:AD	0/1:30:19,11	0/0:38:38,0	./.:0:.,.	0/1:57:35,22	0/0:11:11,0	./.:0:.,.	0/0:17:17,0	0/0:11:11,0	0/0:28:28,0	0/0:16:16,0	0/0:16:16,0	./.:0:.,.	./.:0:.,.	0/0:10:10,0	./.:0:.,.	./.:0:.,.	0/0:15:15,0	0/0:14:14,0	./.:0:.,.	./.:0:.,.	./.:0:.,.	./.:0:.,.	./.:0:.,.	./.:0:.,.	./.:0:.,.	./.:0:.,.	./.:0:.,.	0/0:20:20,0	0/0:13:13,0	0/0:11:11,0	./.:0:.,.	0/0:11:11,0	./.:0:.,.	0/0:11:11,0	0/0:10:10,0	0/0:11:11,0	0/0:11:11,0	./.:0:.,.	0/1:7:4,3	0/1:13:10,3	0/1:10:6,4
MockRefGenome	102829	.	A	G	.	PASS	AC=38;AF=0.190;DP=990;AV=14.50;NS=48	GT:DP:AD	0/1:30:19,11	0/0:38:38,0	./.:0:.,.	0/1:58:35,23	0/0:11:11,0	./.:0:.,.	1/1:17:0,17	0/0:11:11,0	0/1:28:12,16	0/0:16:16,0	0/0:16:16,0	./.:0:.,.	./.:0:.,.	0/1:10:7,3	./.:0:.,.	./.:0:.,.	0/0:15:15,0	0/0:14:14,0	./.:0:.,.	./.:0:.,.	./.:0:.,.	./.:0:.,.	./.:0:.,.	./.:0:.,.	./.:0:.,.	./.:0:.,.	./.:0:.,.	0/1:21:13,8	0/0:13:13,0	0/1:11:7,4	./.:0:.,.	1/1:11:0,11	./.:0:.,.	0/1:11:4,7	0/0:10:10,0	0/0:11:11,0	0/1:11:8,3	./.:0:.,.	0/1:7:3,4	0/1:13:10,3	0/1:10:6,4
MockRefGenome	102856	.	G	A	.	PASS	AC=27;AF=0.135;DP=1016;AV=15.04;NS=46	GT:DP:AD	0/1:31:20,11	0/0:38:38,0	./.:0:.,.	0/1:59:35,24	0/0:11:11,0	./.:0:.,.	0/0:18:18,0	0/0:11:11,0	0/0:30:30,0	0/0:17:17,0	0/0:17:17,0	./.:0:.,.	./.:0:.,.	0/0:10:10,0	./.:0:.,.	./.:0:.,.	0/0:17:17,0	0/0:14:14,0	./.:0:.,.	./.:0:.,.	./.:0:.,.	./.:0:.,.	./.:0:.,.	./.:0:.,.	./.:0:.,.	./.:0:.,.	./.:0:.,.	0/0:22:22,0	0/0:13:13,0	0/0:11:11,0	./.:0:.,.	0/0:12:12,0	./.:0:.,.	0/0:11:11,0	0/0:10:10,0	0/0:12:12,0	0/0:11:11,0	./.:0:.,.	0/1:7:4,3	0/1:14:11,3	0/1:11:7,4
MockRefGenome	103640	.	T	C	.	PASS	AC=24;AF=0.120;DP=1059;AV=17.21;NS=48	GT:DP:AD	0/0:21:21,0	0/0:37:37,0	./.:0:.,.	0/0:68:68,0	1/1:16:0,16	0/1:13:5,8	./.:0:.,.	0/0:11:11,0	1/1:24:0,24	./.:0:.,.	0/0:26:26,0	./.:0:.,.	0/0:14:14,0	0/1:19:16,3	./.:0:.,.	0/0:17:17,0	0/0:12:12,0	0/0:16:16,0	0/1:13:8,5	./.:0:.,.	./.:0:.,.	./.:0:.,.	./.:0:.,.	./.:0:.,.	0/0:10:10,0	./.:0:.,.	./.:0:.,.	0/0:15:15,0	1/1:16:0,16	0/1:18:10,8	./.:0:.,.	0/0:12:12,0	./.:0:.,.	0/0:14:14,0	1/1:16:0,16	1/1:17:0,17	0/0:13:13,0	0/1:17:12,5	0/1:17:5,12	./.:0:.,.	0/1:10:6,4
MockRefGenome	103688	.	G	T	.	PASS	AC=27;AF=0.135;DP=1037;AV=16.56;NS=48	GT:DP:AD	0/0:21:21,0	0/1:37:21,16	./.:0:.,.	0/0:67:67,0	0/1:15:9,6	0/0:13:13,0	./.:0:.,.	0/1:11:4,7	0/0:24:24,0	0/1:9:3,6	1/1:25:0,25	./.:0:.,.	./.:0:.,.	0/1:18:7,11	./.:0:.,.	./.:0:.,.	1/1:12:0,12	1/1:16:0,16	0/0:13:13,0	./.:0:.,.	./.:0:.,.	./.:0:.,.	./.:0:.,.	./.:0:.,.	1/1:10:0,10	./.:0:.,.	./.:0:.,.	0/0:15:15,0	0/0:16:16,0	0/0:18:18,0	./.:0:.,.	0/0:12:12,0	./.:0:.,.	0/1:14:8,6	1/1:15:0,15	0/1:17:12,5	0/1:12:5,7	0/0:17:17,0	0/0:17:17,0	0/0:11:11,0	0/0:10:10,0
MockRefGenome	103696	.	T	C	.	PASS	AC=50;AF=0.250;DP=1029;AV=16.15;NS=48	GT:DP:AD	0/0:21:21,0	0/1:37:21,16	./.:0:.,.	0/0:67:67,0	1/1:15:0,15	1/1:13:0,13	./.:0:.,.	1/1:11:0,11	1/1:24:0,24	0/1:9:5,4	0/1:25:11,14	./.:0:.,.	./.:0:.,.	0/1:18:13,5	./.:0:.,.	./.:0:.,.	1/1:12:0,12	0/1:15:6,9	1/1:13:0,13	./.:0:.,.	./.:0:.,.	./.:0:.,.	./.:0:.,.	./.:0:.,.	0/0:10:10,0	./.:0:.,.	./.:0:.,.	1/1:14:0,14	1/1:16:0,16	1/1:18:0,18	./.:0:.,.	0/1:12:8,4	./.:0:.,.	0/1:14:10,4	1/1:15:0,15	1/1:17:0,17	1/1:12:0,12	0/1:17:8,9	0/1:17:3,14	./.:0:.,.	0/1:10:6,4
MockRefGenome	103706	.	G	A	.	PASS	AC=33;AF=0.165;DP=1026;AV=17.05;NS=43	GT:DP:AD	0/1:21:13,8	0/1:36:16,20	./.:0:.,.	1/1:67:0,67	0/0:15:15,0	0/0:13:13,0	./.:0:.,.	0/0:11:11,0	0/0:24:24,0	0/1:9:6,3	0/0:25:25,0	./.:0:.,.	./.:0:.,.	0/1:18:13,5	./.:0:.,.	0/0:16:16,0	0/0:12:12,0	0/0:15:15,0	0/0:13:13,0	./.:0:.,.	./.:0:.,.	./.:0:.,.	./.:0:.,.	./.:0:.,.	./.:0:.,.	./.:0:.,.	./.:0:.,.	0/0:14:14,0	0/0:16:16,0	0/1:18:8,10	./.:0:.,.	0/1:12:4,8	./.:0:.,.	0/0:14:14,0	0/0:15:15,0	0/0:17:17,0	0/0:12:12,0	0/1:17:9,8	0/1:17:14,3	./.:0:.,.	0/1:10:4,6
MockRefGenome	103736	.	T	C	.	PASS	AC=6;AF=0.030;DP=1013;AV=16.48;NS=48	GT:DP:AD	0/1:20:8,12	0/0:36:36,0	./.:0:.,.	0/1:67:47,20	0/0:15:15,0	0/0:13:13,0	./.:0:.,.	0/0:11:11,0	0/0:24:24,0	0/1:9:6,3	0/0:24:24,0	./.:0:.,.	./.:0:.,.	0/0:18:18,0	./.:0:.,.	0/0:16:16,0	0/0:12:12,0	0/0:15:15,0	0/0:13:13,0	./.:0:.,.	./.:0:.,.	./.:0:.,.	./.:0:.,.	./.:0:.,.	./.:0:.,.	./.:0:.,.	./.:0:.,.	0/0:14:14,0	0/0:16:16,0	0/0:17:17,0	./.:0:.,.	0/0:12:12,0	./.:0:.,.	0/0:13:13,0	0/0:14:14,0	0/0:17:17,0	0/0:12:12,0	0/0:16:16,0	0/0:17:17,0	0/0:11:11,0	0/0:10:10,0
MockRefGenome	103751	.	A	G	.	PASS	AC=11;AF=0.055;DP=1000;AV=16.44;NS=45	GT:DP:AD	./.:0:.,.	0/1:36:31,5	./.:0:.,.	0/0:67:67,0	0/0:15:15,0	0/0:13:13,0	./.:0:.,.	0/0:11:11,0	0/0:24:24,0	./.:0:.,.	0/1:24:13,11	./.:0:.,.	./.:0:.,.	0/1:18:12,6	./.:0:.,.	0/0:16:16,0	0/0:12:12,0	0/1:15:9,6	0/0:13:13,0	./.:0:.,.	./.:0:.,.	./.:0:.,.	./.:0:.,.	./.:0:.,.	./.:0:.,.	./.:0:.,.	./.:0:.,.	0/0:14:14,0	0/0:15:15,0	0/0:16:16,0	./.:0:.,.	0/0:12:12,0	./.:0:.,.	0/1:12:8,4	0/0:14:14,0	0/0:17:17,0	0/0:12:12,0	0/0:16:16,0	0/0:17:17,0	0/0:11:11,0	0/0:10:10,0
MockRefGenome	103806	.	A	G	.	PASS	AC=7;AF=0.035;DP=988;AV=16.28;NS=47	GT:DP:AD	0/0:18:18,0	0/1:36:31,5	./.:0:.,.	0/0:64:64,0	0/0:16:16,0	0/1:12:5,7	./.:0:.,.	0/0:10:10,0	1/1:20:0,20	./.:0:.,.	0/0:24:24,0	./.:0:.,.	0/0:12:12,0	0/0:19:19,0	./.:0:.,.	0/0:17:17,0	0/0:11:11,0	0/0:16:16,0	0/1:12:8,4	./.:0:.,.	./.:0:.,.	./.:0:.,.	./.:0:.,.	./.:0:.,.	./.:0:.,.	./.:0:.,.	./.:0:.,.	0/0:12:12,0	0/0:14:14,0	0/0:17:17,0	./.:0:.,.	0/0:12:12,0	./.:0:.,.	0/0:12:12,0	0/0:16:16,0	0/0:17:17,0	0/0:13:13,0	0/0:16:16,0	0/0:17:17,0	0/0:10:10,0	./.:0:.,.
MockRefGenome	103844	.	T	C	.	PASS	AC=25;AF=0.125;DP=1007;AV=16.77;NS=43	GT:DP:AD	0/1:19:11,8	0/1:36:20,16	./.:0:.,.	0/1:64:20,44	0/0:16:16,0	0/0:12:12,0	./.:0:.,.	0/0:10:10,0	0/0:20:20,0	./.:0:.,.	0/0:25:25,0	./.:0:.,.	0/0:13:13,0	0/1:19:14,5	./.:0:.,.	0/0:17:17,0	0/0:12:12,0	0/0:16:16,0	0/0:13:13,0	./.:0:.,.	./.:0:.,.	./.:0:.,.	./.:0:.,.	./.:0:.,.	./.:0:.,.	./.:0:.,.	./.:0:.,.	0/0:15:15,0	0/0:14:14,0	0/0:17:17,0	./.:0:.,.	0/0:12:12,0	./.:0:.,.	0/0:12:12,0	0/0:16:16,0	0/0:17:17,0	0/0:13:13,0	0/1:16:9,7	0/1:17:14,3	./.:0:.,.	0/1:10:4,6
MockRefGenome	103854	.	A	T	.	PASS	AC=31;AF=0.155;DP=1009;AV=16.86;NS=43	GT:DP:AD	1/1:19:0,19	0/1:36:20,16	./.:0:.,.	0/1:64:20,44	0/0:16:16,0	0/1:12:5,7	./.:0:.,.	0/0:10:10,0	1/1:20:0,20	./.:0:.,.	0/0:25:25,0	./.:0:.,.	0/0:13:13,0	0/1:19:14,5	./.:0:.,.	0/0:17:17,0	0/0:12:12,0	0/0:16:16,0	0/1:13:8,5	./.:0:.,.	./.:0:.,.	./.:0:.,.	./.:0:.,.	./.:0:.,.	./.:0:.,.	./.:0:.,.	./.:0:.,.	0/0:15:15,0	0/0:14:14,0	0/0:17:17,0	./.:0:.,.	0/0:12:12,0	./.:0:.,.	0/0:13:13,0	0/0:16:16,0	0/0:17:17,0	0/0:13:13,0	0/1:16:9,7	0/1:17:14,3	./.:0:.,.	./.:0:.,.
MockRefGenome	103929	.	C	T	.	PASS	AC=42;AF=0.210;DP=1030;AV=16.46;NS=46	GT:DP:AD	1/1:19:0,19	0/1:37:16,21	./.:0:.,.	0/1:64:20,44	0/0:16:16,0	0/1:13:5,8	./.:0:.,.	0/0:11:11,0	1/1:21:0,21	./.:0:.,.	0/1:26:15,11	./.:0:.,.	./.:0:.,.	0/1:19:5,14	./.:0:.,.	0/0:17:17,0	0/0:12:12,0	0/1:16:10,6	0/1:13:8,5	./.:0:.,.	./.:0:.,.	./.:0:.,.	./.:0:.,.	./.:0:.,.	0/0:10:10,0	./.:0:.,.	./.:0:.,.	0/0:15:15,0	0/0:16:16,0	0/0:18:18,0	./.:0:.,.	0/0:12:12,0	./.:0:.,.	0/1:14:8,6	0/0:16:16,0	0/0:17:17,0	0/0:13:13,0	0/1:16:5,11	0/1:17:12,5	./.:0:.,.	./.:0:.,.
MockRefGenome	104307	.	T	A	.	PASS	AC=10;AF=0.050;DP=1342;AV=16.65;NS=68	GT:DP:AD	1/1:21:0,21	0/0:54:54,0	0/0:28:28,0	0/0:41:41,0	0/0:14:14,0	0/0:18:18,0	0/0:16:16,0	0/0:16:16,0	0/0:44:44,0	./.:0:.,.	0/0:31:31,0	0/0:21:21,0	0/0:16:16,0	0/0:24:24,0	0/0:20:20,0	0/0:14:14,0	0/0:25:25,0	0/0:14:14,0	0/0:10:10,0	0/0:19:19,0	0/0:13:13,0	0/0:12:12,0	./.:0:.,.	./.:0:.,.	0/0:11:11,0	0/0:14:14,0	0/0:21:21,0	0/0:34:34,0	0/0:16:16,0	0/0:23:23,0	0/0:20:20,0	./.:0:.,.	./.:0:.,.	0/0:11:11,0	0/0:19:19,0	0/0:17:17,0	0/0:11:11,0	./.:0:.,.	0/0:12:12,0	0/0:21:21,0	./.:0:.,.
MockRefGenome	104343	.	G	A	.	PASS	AC=9;AF=0.045;DP=1325;AV=16.89;NS=65	GT:DP:AD	0/0:21:21,0	0/0:54:54,0	0/0:28:28,0	0/0:41:41,0	0/0:14:14,0	0/0:18:18,0	0/1:16:10,6	0/0:16:16,0	0/1:43:17,26	./.:0:.,.	0/0:31:31,0	0/0:21:21,0	0/0:15:15,0	0/0:24:24,0	0/0:20:20,0	0/0:14:14,0	0/1:25:16,9	0/0:13:13,0	0/0:10:10,0	0/0:19:19,0	0/0:13:13,0	0/0:12:12,0	0/0:17:17,0	0/1:17:3,14	0/0:11:11,0	0/0:14:14,0	0/0:20:20,0	0/1:32:17,15	0/0:15:15,0	0/0:23:23,0	0/0:18:18,0	./.:0:.,.	./.:0:.,.	0/0:11:11,0	0/0:19:19,0	0/0:17:17,0	./.:0:.,.	./.:0:.,.	0/0:12:12,0	0/0:21:21,0	./.:0:.,.
MockRefGenome	104368	.	G	A	.	PASS	AC=14;AF=0.070;DP=1305;AV=16.44;NS=68	GT:DP:AD	0/0:21:21,0	0/0:54:54,0	0/0:28:28,0	1/1:41:0,41	0/0:14:14,0	0/0:18:18,0	0/0:16:16,0	0/0:15:15,0	0/0:43:43,0	./.:0:.,.	0/0:31:31,0	0/0:21:21,0	0/0:15:15,0	0/0:24:24,0	0/0:19:19,0	0/0:14:14,0	0/0:23:23,0	0/0:11:11,0	0/0:10:10,0	0/0:18:18,0	0/0:13:13,0	0/0:12:12,0	0/0:17:17,0	0/0:17:17,0	0/0:11:11,0	0/0:14:14,0	0/0:20:20,0	0/0:32:32,0	0/0:15:15,0	0/0:22:22,0	0/0:17:17,0	./.:0:.,.	./.:0:.,.	0/0:10:10,0	0/0:18:18,0	0/0:17:17,0	0/0:11:11,0	./.:0:.,.	0/0:11:11,0	0/0:21:21,0	./.:0:.,.
MockRefGenome	104377	.	C	A	.	PASS	AC=14;AF=0.070;DP=1291;AV=16.28;NS=68	GT:DP:AD	0/0:21:21,0	0/0:53:53,0	0/0:28:28,0	1/1:41:0,41	0/0:14:14,0	0/0:18:18,0	0/0:16:16,0	0/0:15:15,0	0/0:43:43,0	./.:0:.,.	0/0:30:30,0	0/0:20:20,0	0/0:15:15,0	0/0:24:24,0	0/0:19:19,0	0/0:14:14,0	0/0:22:22,0	0/0:11:11,0	0/0:10:10,0	0/0:17:17,0	0/0:13:13,0	0/0:11:11,0	0/0:17:17,0	0/0:16:16,0	0/0:11:11,0	0/0:14:14,0	0/0:20:20,0	0/0:32:32,0	0/0:15:15,0	0/0:21:21,0	0/0:16:16,0	./.:0:.,.	./.:0:.,.	0/0:10:10,0	0/0:18:18,0	0/0:16:16,0	0/0:11:11,0	./.:0:.,.	0/0:11:11,0	0/0:21:21,0	./.:0:.,.
MockRefGenome	104379	.	T	C	.	PASS	AC=47;AF=0.235;DP=1291;AV=16.18;NS=67	GT:DP:AD	0/0:21:21,0	0/0:53:53,0	1/1:28:0,28	0/0:41:41,0	0/1:14:8,6	1/1:18:0,18	1/1:16:0,16	0/0:15:15,0	1/1:43:0,43	./.:0:.,.	0/0:30:30,0	0/1:20:16,4	0/0:15:15,0	0/0:24:24,0	0/1:19:13,6	0/0:14:14,0	0/0:22:22,0	0/0:11:11,0	0/1:10:4,6	0/1:17:6,11	0/1:13:8,5	1/1:11:0,11	./.:0:.,.	./.:0:.,.	1/1:11:0,11	1/1:14:0,14	1/1:20:0,20	1/1:32:0,32	0/0:15:15,0	0/0:21:20,1	1/1:17:0,17	./.:0:.,.	./.:0:.,.	0/1:10:4,6	0/1:18:11,7	0/1:16:3,13	0/0:11:11,0	./.:0:.,.	0/1:11:3,8	0/0:21:21,0	./.:0:.,.
MockRefGenome	104412	.	T	C	.	PASS	AC=58;AF=0.290;DP=1271;AV=16.06;NS=62	GT:DP:AD	1/1:21:0,21	0/0:52:52,0	0/1:28:16,12	0/0:41:41,0	0/0:14:14,0	1/1:18:0,18	./.:0:.,.	0/0:15:15,0	0/1:43:26,17	./.:0:.,.	0/0:30:30,0	1/1:19:0,19	0/0:15:15,0	0/0:24:24,0	1/1:19:0,19	0/0:14:14,0	0/0:21:21,0	./.:0:.,.	1/1:10:0,10	1/1:16:0,16	1/1:13:0,13	./.:0:.,.	0/1:17:7,10	./.:0:.,.	0/0:11:11,0	0/1:13:7,6	./.:0:.,.	0/1:31:15,16	0/1:15:7,8	./.:0:.,.	1/1:15:0,15	./.:0:.,.	./.:0:.,.	./.:0:.,.	0/1:18:7,11	0/0:16:16,0	0/0:11:11,0	./.:0:.,.	1/1:11:0,11	1/1:20:0,20	./.:0:.,.
MockRefGenome	104455	.	T	C	.	PASS	AC=17;AF=0.085;DP=1154;AV=15.57;NS=54	GT:DP:AD	1/1:19:0,19	0/0:41:41,0	0/0:22:22,0	0/0:34:34,0	0/1:11:4,7	0/0:17:17,0	./.:0:.,.	0/0:15:15,0	0/0:36:36,0	./.:0:.,.	0/0:28:28,0	0/0:16:16,0	0/0:13:13,0	0/0:21:21,0	0/0:17:17,0	0/0:12:12,0	0/0:22:22,0	./.:0:.,.	./.:0:.,.	0/0:17:17,0	0/0:11:11,0	0/0:11:11,0	./.:0:.,.	./.:0:.,.	0/0:11:11,0	0/0:13:13,0	0/0:19:19,0	0/0:31:31,0	0/1:15:9,6	./.:0:.,.	0/0:17:17,0	./.:0:.,.	0/0:12:12,0	./.:0:.,.	0/1:13:6,7	0/1:16:13,3	./.:0:.,.	./.:0:.,.	0/1:11:3,8	0/0:18:18,0	./.:0:.,.
MockRefGenome	104494	.	C	G	.	PASS	AC=22;AF=0.110;DP=1204;AV=16.64;NS=55	GT:DP:AD	0/0:19:19,0	0/1:44:10,34	0/0:23:23,0	0/0:39:39,0	0/0:12:12,0	0/0:18:18,0	0/0:15:15,0	0/1:15:3,12	0/0:37:37,0	./.:0:.,.	1/1:29:0,29	0/0:16:16,0	./.:0:.,.	0/1:22:8,14	0/0:18:18,0	0/1:13:3,10	1/1:22:0,22	1/1:10:0,10	./.:0:.,.	0/0:18:18,0	0/0:11:11,0	0/0:11:11,0	0/0:15:15,0	0/0:17:17,0	0/0:11:11,0	0/0:13:13,0	0/0:20:20,0	0/0:32:32,0	0/0:15:15,0	0/0:20:20,0	0/0:18:18,0	./.:0:.,.	0/1:13:7,6	./.:0:.,.	0/0:14:14,0	0/0:16:16,0	1/1:10:0,10	./.:0:.,.	0/0:11:11,0	0/0:18:18,0	./.:0:.,.
MockRefGenome	104524	.	A	G	.	PASS	AC=18;AF=0.090;DP=1268;AV=16.39;NS=64	GT:DP:AD	0/0:20:20,0	0/0:50:50,0	0/0:26:26,0	0/0:40:40,0	0/0:14:14,0	0/0:18:18,0	1/1:16:0,16	0/0:16:16,0	0/1:38:16,22	./.:0:.,.	0/0:30:30,0	0/0:16:16,0	0/0:15:15,0	0/0:22:22,0	0/0:19:19,0	0/0:14:14,0	0/0:25:25,0	0/0:12:12,0	0/0:10:10,0	0/0:19:19,0	0/0:13:13,0	0/0:11:11,0	0/0:15:15,0	0/1:17:3,14	0/1:11:4,7	0/0:13:13,0	0/0:20:20,0	0/1:32:16,16	0/1:16:7,9	0/0:20:20,0	0/0:19:19,0	./.:0:.,.	0/1:13:6,7	0/0:10:10,0	1/1:14:0,14	0/1:17:3,14	0/0:10:10,0	./.:0:.,.	0/1:12:4,8	0/0:18:18,0	./.:0:.,.
MockRefGenome	104547	.	G	T	.	PASS	AC=21;AF=0.105;DP=1322;AV=16.88;NS=65	GT:DP:AD	0/0:21:21,0	0/0:53:53,0	0/0:28:28,0	0/0:41:41,0	0/0:14:14,0	0/0:18:18,0	0/0:16:16,0	0/0:16:16,0	0/0:41:41,0	./.:0:.,.	0/0:31:31,0	0/1:20:5,15	0/0:15:15,0	0/0:22:22,0	0/1:20:7,13	0/0:14:14,0	0/0:25:25,0	0/0:13:13,0	0/1:10:6,4	0/1:19:11,8	0/1:13:5,8	0/0:11:11,0	0/0:16:16,0	./.:0:.,.	0/0:11:11,0	0/1:14:7,7	0/0:21:21,0	0/0:34:34,0	0/0:16:16,0	0/0:22:22,0	0/0:19:19,0	./.:0:.,.	0/0:14:14,0	0/0:11:11,0	0/0:17:17,0	0/0:17:17,0	0/0:11:11,0	./.:0:.,.	0/1:12:8,4	0/1:20:12,8	./.:0:.,.
MockRefGenome	104584	.	T	C	.	PASS	AC=29;AF=0.145;DP=1348;AV=16.61;NS=69	GT:DP:AD	1/1:21:0,21	0/0:54:54,0	0/0:28:28,0	1/1:41:0,41	0/1:14:6,8	0/0:18:18,0	0/0:16:16,0	0/0:16:16,0	0/0:44:44,0	./.:0:.,.	0/0:31:31,0	0/0:21:21,0	0/0:16:16,0	0/0:24:24,0	0/0:20:20,0	0/0:14:14,0	0/0:25:25,0	0/0:14:14,0	0/0:10:10,0	0/0:19:19,0	0/0:13:13,0	0/0:12:12,0	./.:0:.,.	./.:0:.,.	0/0:11:11,0	0/0:14:14,0	0/0:21:21,0	0/0:34:34,0	0/1:16:9,7	1/1:23:1,22	0/0:20:20,0	./.:0:.,.	0/0:14:14,0	0/0:11:11,0	0/0:19:19,0	0/1:17:14,3	0/0:11:11,0	./.:0:.,.	0/0:12:12,0	0/0:21:21,0	./.:0:.,.
MockRefGenome	104615	.	G	A	.	PASS	AC=24;AF=0.120;DP=812;AV=15.22;NS=32	GT:DP:AD	1/1:20:0,20	0/1:39:20,19	./.:0:.,.	0/0:36:36,0	0/0:19:19,0	0/1:7:4,3	./.:0:.,.	0/0:12:12,0	./.:0:.,.	./.:0:.,.	0/1:19:8,11	./.:0:.,.	0/1:16:7,9	./.:0:.,.	./.:0:.,.	0/1:9:5,4	./.:0:.,.	./.:0:.,.	./.:0:.,.	./.:0:.,.	./.:0:.,.	./.:0:.,.	./.:0:.,.	./.:0:.,.	./.:0:.,.	./.:0:.,.	./.:0:.,.	./.:0:.,.	0/0:14:14,0	0/0:13:13,0	./.:0:.,.	0/0:14:14,0	./.:0:.,.	./.:0:.,.	0/0:16:16,0	0/0:10:10,0	0/0:13:13,0	./.:0:.,.	./.:0:.,.	./.:0:.,.	./.:0:.,.
MockRefGenome	104690	.	T	A	.	PASS	AC=18;AF=0.090;DP=799;AV=15.09;NS=35	GT:DP:AD	1/1:20:0,20	0/1:39:28,11	./.:0:.,.	0/0:36:36,0	0/0:20:20,0	0/1:7:4,3	./.:0:.,.	0/0:12:12,0	./.:0:.,.	./.:0:.,.	0/0:18:18,0	./.:0:.,.	0/0:15:15,0	0/1:12:4,8	./.:0:.,.	./.:0:.,.	0/0:18:18,0	0/0:13:13,0	./.:0:.,.	./.:0:.,.	./.:0:.,.	./.:0:.,.	./.:0:.,.	./.:0:.,.	./.:0:.,.	./.:0:.,.	./.:0:.,.	./.:0:.,.	0/0:14:14,0	0/0:13:13,0	./.:0:.,.	0/0:14:14,0	./.:0:.,.	0/0:13:13,0	0/0:15:15,0	0/0:10:10,0	0/0:13:13,0	./.:0:.,.	./.:0:.,.	./.:0:.,.	./.:0:.,.
MockRefGenome	104700	.	A	G	.	PASS	AC=16;AF=0.080;DP=789;AV=15.19;NS=36	GT:DP:AD	0/1:20:10,10	0/1:38:27,11	./.:0:.,.	0/0:36:36,0	0/0:20:20,0	./.:0:.,.	./.:0:.,.	0/0:11:11,0	0/0:20:20,0	./.:0:.,.	0/0:18:18,0	./.:0:.,.	0/0:15:15,0	0/1:12:4,8	./.:0:.,.	./.:0:.,.	0/0:18:18,0	0/0:13:13,0	./.:0:.,.	./.:0:.,.	./.:0:.,.	./.:0:.,.	./.:0:.,.	./.:0:.,.	./.:0:.,.	./.:0:.,.	./.:0:.,.	./.:0:.,.	0/0:14:14,0	0/0:13:13,0	./.:0:.,.	0/0:14:14,0	./.:0:.,.	0/0:12:12,0	0/0:15:15,0	0/0:10:10,0	0/0:13:13,0	./.:0:.,.	./.:0:.,.	./.:0:.,.	./.:0:.,.
MockRefGenome	104738	.	T	C	.	PASS	AC=5;AF=0.025;DP=785;AV=15.18;NS=33	GT:DP:AD	0/0:20:20,0	0/1:38:30,8	./.:0:.,.	0/0:36:36,0	0/0:19:19,0	0/1:7:4,3	./.:0:.,.	0/0:11:11,0	./.:0:.,.	./.:0:.,.	0/0:18:18,0	./.:0:.,.	0/0:15:15,0	0/0:12:12,0	./.:0:.,.	./.:0:.,.	0/0:18:18,0	0/0:12:12,0	./.:0:.,.	./.:0:.,.	./.:0:.,.	./.:0:.,.	./.:0:.,.	./.:0:.,.	./.:0:.,.	./.:0:.,.	./.:0:.,.	./.:0:.,.	0/0:14:14,0	0/0:13:13,0	./.:0:.,.	0/0:14:14,0	./.:0:.,.	0/0:12:12,0	0/0:15:15,0	0/0:10:10,0	0/0:13:13,0	./.:0:.,.	./.:0:.,.	./.:0:.,.	0/1:8:4,4
MockRefGenome	104792	.	T	C	.	PASS	AC=11;AF=0.055;DP=884;AV=16.41;NS=34	GT:DP:AD	0/0:20:20,0	0/1:38:30,8	./.:0:.,.	0/0:94:94,0	0/0:18:18,0	./.:0:.,.	./.:0:.,.	0/0:11:11,0	0/0:20:20,0	./.:0:.,.	0/1:19:8,11	./.:0:.,.	0/1:12:6,6	./.:0:.,.	./.:0:.,.	0/1:9:5,4	./.:0:.,.	./.:0:.,.	./.:0:.,.	./.:0:.,.	./.:0:.,.	./.:0:.,.	./.:0:.,.	./.:0:.,.	./.:0:.,.	./.:0:.,.	./.:0:.,.	./.:0:.,.	0/0:12:12,0	0/0:13:13,0	./.:0:.,.	0/0:11:11,0	./.:0:.,.	./.:0:.,.	0/0:16:16,0	./.:0:.,.	0/0:10:10,0	./.:0:.,.	./.:0:.,.	0/0:12:12,0	./.:0:.,.
MockRefGenome	104837	.	C	T	.	PASS	AC=32;AF=0.160;DP=916;AV=15.98;NS=41	GT:DP:AD	0/1:23:12,11	0/1:39:20,19	./.:0:.,.	1/1:94:0,94	0/0:18:18,0	./.:0:.,.	./.:0:.,.	0/0:12:12,0	0/0:20:20,0	./.:0:.,.	0/0:19:19,0	./.:0:.,.	./.:0:.,.	0/1:13:4,9	./.:0:.,.	./.:0:.,.	0/0:17:17,0	0/0:12:12,0	./.:0:.,.	./.:0:.,.	./.:0:.,.	./.:0:.,.	./.:0:.,.	./.:0:.,.	./.:0:.,.	./.:0:.,.	./.:0:.,.	./.:0:.,.	0/0:13:13,0	0/1:13:5,8	./.:0:.,.	0/1:11:7,4	./.:0:.,.	0/0:10:10,0	0/0:16:16,0	./.:0:.,.	0/0:10:10,0	./.:0:.,.	0/1:8:5,3	0/1:12:8,4	0/1:8:5,3
MockRefGenome	104847	.	A	G	.	PASS	AC=40;AF=0.200;DP=926;AV=16.05;NS=39	GT:DP:AD	0/0:23:23,0	0/1:39:19,20	./.:0:.,.	0/0:95:95,0	1/1:18:0,18	./.:0:.,.	./.:0:.,.	1/1:12:0,12	1/1:20:0,20	./.:0:.,.	0/1:19:11,8	./.:0:.,.	0/1:14:9,5	./.:0:.,.	./.:0:.,.	0/1:9:4,5	./.:0:.,.	./.:0:.,.	./.:0:.,.	./.:0:.,.	./.:0:.,.	./.:0:.,.	./.:0:.,.	./.:0:.,.	./.:0:.,.	./.:0:.,.	./.:0:.,.	./.:0:.,.	1/1:13:0,13	1/1:13:0,13	./.:0:.,.	0/1:11:4,7	./.:0:.,.	0/1:10:4,6	1/1:16:0,16	./.:0:.,.	1/1:10:0,10	./.:0:.,.	0/1:8:3,5	0/1:12:4,8	0/1:8:3,5
MockRefGenome	104855	.	C	A	.	PASS	AC=21;AF=0.105;DP=936;AV=17.20;NS=35	GT:DP:AD	0/0:23:23,0	0/1:39:19,20	./.:0:.,.	0/0:95:95,0	0/1:18:9,9	./.:0:.,.	./.:0:.,.	./.:0:.,.	0/0:20:20,0	./.:0:.,.	1/1:19:0,19	./.:0:.,.	./.:0:.,.	0/1:13:10,3	./.:0:.,.	./.:0:.,.	1/1:18:0,18	1/1:12:0,12	./.:0:.,.	./.:0:.,.	./.:0:.,.	./.:0:.,.	./.:0:.,.	./.:0:.,.	./.:0:.,.	./.:0:.,.	./.:0:.,.	./.:0:.,.	0/0:13:13,0	0/0:13:13,0	./.:0:.,.	0/0:12:12,0	./.:0:.,.	./.:0:.,.	1/1:16:0,16	0/1:9:5,4	0/1:10:4,6	./.:0:.,.	./.:0:.,.	0/0:12:12,0	./.:0:.,.
MockRefGenome	104903	.	A	G	.	PASS	AC=23;AF=0.115;DP=986;AV=16.83;NS=41	GT:DP:AD	0/0:23:23,0	0/0:39:39,0	./.:0:.,.	0/0:95:95,0	1/1:20:0,20	0/1:7:4,3	./.:0:.,.	0/0:12:12,0	1/1:20:0,20	./.:0:.,.	0/0:19:19,0	./.:0:.,.	./.:0:.,.	./.:0:.,.	./.:0:.,.	./.:0:.,.	0/0:18:18,0	0/0:14:14,0	./.:0:.,.	./.:0:.,.	./.:0:.,.	./.:0:.,.	./.:0:.,.	./.:0:.,.	./.:0:.,.	./.:0:.,.	./.:0:.,.	./.:0:.,.	1/1:14:0,14	0/1:13:8,5	./.:0:.,.	0/0:14:14,0	./.:0:.,.	0/0:13:13,0	1/1:16:0,16	1/1:10:0,10	0/0:13:13,0	./.:0:.,.	./.:0:.,.	0/1:13:5,8	0/1:9:3,6
MockRefGenome	105289	.	A	G	.	PASS	AC=16;AF=0.080;DP=731;AV=17.00;NS=33	GT:DP:AD	0/0:22:22,0	0/1:46:11,35	./.:0:.,.	0/0:44:44,0	0/0:11:11,0	./.:0:.,.	./.:0:.,.	0/1:20:15,5	./.:0:.,.	0/0:16:16,0	0/1:24:12,12	0/0:13:13,0	0/1:20:9,11	0/1:15:3,12	./.:0:.,.	0/0:15:15,0	0/0:17:17,0	0/0:21:20,1	./.:0:.,.	0/0:10:10,0	./.:0:.,.	./.:0:.,.	./.:0:.,.	./.:0:.,.	./.:0:.,.	./.:0:.,.	./.:0:.,.	./.:0:.,.	0/1:11:4,7	0/1:13:3,10	./.:0:.,.	0/0:12:12,0	0/0:18:18,0	0/0:16:16,0	0/1:13:10,3	1/1:11:0,11	./.:0:.,.	./.:0:.,.	./.:0:.,.	./.:0:.,.	./.:0:.,.
MockRefGenome	105307	.	T	G	.	PASS	AC=10;AF=0.050;DP=730;AV=16.97;NS=33	GT:DP:AD	0/0:22:22,0	0/0:46:46,0	./.:0:.,.	0/0:44:44,0	1/1:11:0,11	./.:0:.,.	./.:0:.,.	0/0:20:20,0	./.:0:.,.	0/0:16:16,0	0/0:24:24,0	0/0:13:13,0	0/0:19:19,0	0/0:15:15,0	./.:0:.,.	0/0:15:15,0	0/0:17:17,0	0/0:21:21,0	./.:0:.,.	0/0:10:10,0	./.:0:.,.	./.:0:.,.	./.:0:.,.	./.:0:.,.	./.:0:.,.	./.:0:.,.	./.:0:.,.	./.:0:.,.	./.:0:.,.	1/1:13:0,13	./.:0:.,.	0/1:12:9,3	0/0:18:18,0	0/0:16:16,0	1/1:13:0,13	1/1:11:0,11	./.:0:.,.	./.:0:.,.	./.:0:.,.	./.:0:.,.	./.:0:.,.
MockRefGenome	105357	.	G	C	.	PASS	AC=10;AF=0.050;DP=714;AV=16.81;NS=32	GT:DP:AD	0/0:22:22,0	0/1:46:11,35	./.:0:.,.	0/0:44:44,0	0/0:11:11,0	./.:0:.,.	./.:0:.,.	0/1:20:15,5	./.:0:.,.	0/0:16:16,0	0/1:24:12,12	0/0:12:12,0	0/1:19:9,10	0/1:15:3,12	./.:0:.,.	0/0:14:14,0	0/0:16:16,0	0/0:20:20,0	./.:0:.,.	./.:0:.,.	./.:0:.,.	./.:0:.,.	./.:0:.,.	./.:0:.,.	./.:0:.,.	./.:0:.,.	./.:0:.,.	./.:0:.,.	0/0:10:10,0	0/0:13:13,0	./.:0:.,.	0/0:12:12,0	0/0:18:18,0	0/0:16:16,0	0/0:10:10,0	0/0:11:11,0	./.:0:.,.	./.:0:.,.	./.:0:.,.	./.:0:.,.	./.:0:.,.
MockRefGenome	105398	.	G	A	.	PASS	AC=10;AF=0.050;DP=698;AV=16.93;NS=28	GT:DP:AD	0/0:22:22,0	0/1:45:40,5	./.:0:.,.	0/0:42:42,0	0/0:11:11,0	./.:0:.,.	./.:0:.,.	./.:0:.,.	./.:0:.,.	0/1:16:10,6	0/1:21:16,5	0/0:12:12,0	0/1:19:15,4	0/0:14:14,0	./.:0:.,.	./.:0:.,.	0/1:16:3,13	0/1:20:5,15	./.:0:.,.	./.:0:.,.	./.:0:.,.	./.:0:.,.	./.:0:.,.	./.:0:.,.	./.:0:.,.	./.:0:.,.	./.:0:.,.	./.:0:.,.	0/0:10:10,0	0/0:13:13,0	./.:0:.,.	0/0:12:12,0	0/0:18:18,0	0/0:15:15,0	./.:0:.,.	0/0:11:11,0	0/1:9:5,4	./.:0:.,.	./.:0:.,.	./.:0:.,.	./.:0:.,.
MockRefGenome	105407	.	A	C	.	PASS	AC=12;AF=0.060;DP=691;AV=17.27;NS=26	GT:DP:AD	0/0:22:22,0	0/0:44:44,0	./.:0:.,.	1/1:42:1,41	0/0:11:11,0	./.:0:.,.	./.:0:.,.	0/0:19:19,0	./.:0:.,.	0/0:16:16,0	0/0:21:21,0	0/0:12:12,0	0/0:19:19,0	0/0:14:14,0	./.:0:.,.	0/0:14:14,0	./.:0:.,.	0/0:20:20,0	./.:0:.,.	./.:0:.,.	./.:0:.,.	./.:0:.,.	./.:0:.,.	./.:0:.,.	./.:0:.,.	./.:0:.,.	./.:0:.,.	./.:0:.,.	./.:0:.,.	0/0:13:13,0	./.:0:.,.	0/0:12:12,0	./.:0:.,.	0/0:15:15,0	./.:0:.,.	0/0:11:11,0	./.:0:.,.	./.:0:.,.	./.:0:.,.	./.:0:.,.	./.:0:.,.
MockRefGenome	105413	.	A	C	.	PASS	AC=4;AF=0.020;DP=508;AV=17.43;NS=21	GT:DP:AD	0/0:22:22,0	0/1:44:15,29	./.:0:.,.	0/0:42:42,0	0/0:11:11,0	./.:0:.,.	./.:0:.,.	./.:0:.,.	./.:0:.,.	./.:0:.,.	./.:0:.,.	0/0:12:12,0	./.:0:.,.	./.:0:.,.	./.:0:.,.	./.:0:.,.	0/0:16:16,0	0/0:20:20,0	./.:0:.,.	./.:0:.,.	./.:0:.,.	./.:0:.,.	./.:0:.,.	./.:0:.,.	./.:0:.,.	./.:0:.,.	./.:0:.,.	./.:0:.,.	./.:0:.,.	0/0:13:13,0	./.:0:.,.	0/0:12:12,0	0/0:18:18,0	0/0:15:15,0	0/1:9:3,6	0/0:11:11,0	./.:0:.,.	./.:0:.,.	./.:0:.,.	./.:0:.,.	./.:0:.,.
MockRefGenome	105519	.	G	T	.	PASS	AC=16;AF=0.080;DP=737;AV=16.71;NS=34	GT:DP:AD	0/0:22:22,0	0/0:45:45,0	./.:0:.,.	0/0:41:41,0	1/1:11:0,11	./.:0:.,.	./.:0:.,.	0/0:18:18,0	./.:0:.,.	0/0:15:15,0	0/0:23:23,0	1/1:11:0,11	0/0:19:19,0	0/0:15:15,0	./.:0:.,.	0/0:14:14,0	0/0:16:16,0	0/0:24:24,0	./.:0:.,.	0/0:10:10,0	./.:0:.,.	./.:0:.,.	./.:0:.,.	./.:0:.,.	./.:0:.,.	./.:0:.,.	./.:0:.,.	./.:0:.,.	1/1:10:0,10	1/1:13:0,13	./.:0:.,.	1/1:12:0,12	0/0:18:18,0	0/0:24:24,0	1/1:10:0,10	1/1:11:0,11	./.:0:.,.	./.:0:.,.	./.:0:.,.	./.:0:.,.	./.:0:.,.
MockRefGenome	105686	.	A	G	.	PASS	AC=34;AF=0.170;DP=1255;AV=16.87;NS=55	GT:DP:AD	0/0:10:10,0	0/0:47:47,0	1/1:16:0,16	0/0:59:58,1	0/0:23:23,0	1/1:10:0,10	0/1:46:27,19	0/0:14:14,0	1/1:20:0,20	0/0:13:13,0	0/0:22:22,0	./.:0:.,.	0/0:17:17,0	0/0:27:27,0	1/1:13:0,13	0/1:14:10,4	0/0:19:19,0	0/0:13:13,0	./.:0:.,.	0/1:12:3,9	1/1:14:0,14	1/1:14:0,14	1/1:23:0,23	./.:0:.,.	./.:0:.,.	1/1:17:0,17	./.:0:.,.	./.:0:.,.	0/0:18:18,0	0/0:17:17,0	1/1:14:0,14	0/0:10:10,0	0/1:11:6,5	0/1:22:17,5	0/0:10:10,0	0/0:12:12,0	0/0:27:27,0	./.:0:.,.	0/0:15:15,0	0/1:10:6,4	0/1:8:5,3
MockRefGenome	105739	.	C	T	.	PASS	AC=21;AF=0.105;DP=1229;AV=16.66;NS=56	GT:DP:AD	0/0:10:10,0	0/0:47:47,0	0/0:16:16,0	0/1:58:26,32	0/1:23:18,5	0/0:10:10,0	0/1:44:19,25	0/0:14:14,0	0/0:20:20,0	0/0:12:12,0	0/0:22:22,0	./.:0:.,.	0/0:16:16,0	0/0:27:27,0	0/0:12:12,0	0/0:14:14,0	0/0:19:19,0	0/0:13:13,0	./.:0:.,.	0/1:11:8,3	0/0:14:14,0	0/0:13:13,0	0/0:22:22,0	./.:0:.,.	./.:0:.,.	0/0:16:16,0	./.:0:.,.	./.:0:.,.	0/0:17:17,0	0/0:17:17,0	0/0:13:13,0	0/0:10:10,0	0/0:11:11,0	0/0:22:22,0	0/0:10:10,0	0/0:12:12,0	0/0:27:27,0	./.:0:.,.	0/1:14:6,8	./.:0:.,.	./.:0:.,.
MockRefGenome	105772	.	G	A	.	PASS	AC=32;AF=0.160;DP=1234;AV=16.12;NS=59	GT:DP:AD	./.:0:.,.	0/0:43:43,0	0/1:16:4,12	0/0:58:58,0	0/1:21:4,17	0/0:11:11,0	0/0:44:44,0	0/1:14:7,7	0/0:20:20,0	./.:0:.,.	0/1:22:6,16	./.:0:.,.	0/0:17:17,0	0/1:24:13,11	0/0:12:12,0	0/1:15:6,9	0/1:19:3,16	1/1:11:0,11	./.:0:.,.	0/0:11:11,0	0/0:14:14,0	0/0:14:14,0	0/1:22:20,2	./.:0:.,.	0/1:9:6,3	0/0:16:16,0	0/1:6:3,3	0/1:10:4,6	1/1:17:0,17	1/1:17:0,17	0/0:14:14,0	0/1:10:7,3	0/0:11:11,0	0/1:22:5,17	1/1:10:0,10	1/1:11:0,11	0/1:27:12,15	./.:0:.,.	./.:0:.,.	0/0:10:10,0	./.:0:.,.
MockRefGenome	105815	.	T	C	.	PASS	AC=24;AF=0.120;DP=1266;AV=16.54;NS=61	GT:DP:AD	0/0:10:10,0	0/0:44:44,0	0/0:16:16,0	0/1:59:28,31	0/1:22:18,4	0/0:11:11,0	0/1:46:20,26	0/0:14:14,0	0/0:20:20,0	0/0:13:13,0	0/0:22:22,0	./.:0:.,.	0/0:17:17,0	0/0:27:27,0	0/0:13:13,0	0/0:15:15,0	0/0:19:19,0	0/0:12:12,0	./.:0:.,.	0/1:12:9,3	0/0:14:14,0	0/0:14:14,0	0/0:22:22,0	./.:0:.,.	./.:0:.,.	0/0:17:17,0	./.:0:.,.	0/0:10:10,0	0/0:17:17,0	0/0:17:17,0	0/0:14:14,0	0/0:10:10,0	0/0:11:11,0	0/0:22:22,0	0/0:10:10,0	0/0:12:12,0	0/0:27:27,0	./.:0:.,.	0/1:14:6,8	./.:0:.,.	./.:0:.,.
MockRefGenome	105843	.	G	A	.	PASS	AC=19;AF=0.095;DP=1272;AV=16.74;NS=61	GT:DP:AD	0/0:10:10,0	0/0:45:45,0	0/0:16:16,0	0/1:59:28,31	0/0:23:23,0	0/0:11:11,0	0/0:46:46,0	0/0:14:14,0	0/0:20:20,0	0/0:13:13,0	0/0:22:22,0	./.:0:.,.	0/0:17:17,0	0/0:27:27,0	0/0:13:13,0	0/0:15:15,0	0/0:19:19,0	0/0:13:13,0	./.:0:.,.	0/0:12:12,0	0/0:14:14,0	0/0:14:14,0	0/0:22:22,0	./.:0:.,.	./.:0:.,.	0/0:17:17,0	./.:0:.,.	0/0:10:10,0	0/0:17:17,0	0/0:17:17,0	0/0:14:14,0	0/0:10:10,0	0/0:11:11,0	0/0:23:23,0	0/0:10:10,0	0/0:12:12,0	0/0:27:27,0	./.:0:.,.	0/0:14:14,0	./.:0:.,.	./.:0:.,.
MockRefGenome	105880	.	C	T	.	PASS	AC=19;AF=0.095;DP=1262;AV=16.73;NS=60	GT:DP:AD	0/0:10:10,0	0/0:46:46,0	0/0:16:16,0	0/1:58:26,32	0/0:24:24,0	0/0:11:11,0	0/0:46:46,0	0/0:14:14,0	0/0:20:20,0	0/0:13:13,0	0/0:22:22,0	./.:0:.,.	0/0:17:17,0	0/0:27:27,0	0/0:13:13,0	0/0:15:15,0	0/0:19:19,0	0/0:13:13,0	./.:0:.,.	0/0:12:12,0	0/0:14:14,0	0/0:14:14,0	0/0:22:22,0	./.:0:.,.	./.:0:.,.	0/0:17:17,0	./.:0:.,.	0/0:10:10,0	0/0:18:18,0	0/0:17:17,0	0/0:14:14,0	0/0:10:10,0	0/0:11:11,0	0/0:23:23,0	0/0:10:10,0	0/0:12:12,0	0/0:27:27,0	./.:0:.,.	0/0:14:14,0	./.:0:.,.	./.:0:.,.
MockRefGenome	106542	.	A	T	.	PASS	AC=6;AF=0.030;DP=634;AV=15.32;NS=25	GT:DP:AD	0/0:10:10,0	0/1:12:7,5	0/0:10:10,0	0/0:76:76,0	./.:0:.,.	0/0:15:15,0	0/0:14:14,0	./.:0:.,.	./.:0:.,.	0/1:11:7,4	0/1:9:4,5	./.:0:.,.	0/1:9:5,4	./.:0:.,.	./.:0:.,.	./.:0:.,.	./.:0:.,.	./.:0:.,.	./.:0:.,.	./.:0:.,.	./.:0:.,.	./.:0:.,.	./.:0:.,.	./.:0:.,.	./.:0:.,.	./.:0:.,.	./.:0:.,.	./.:0:.,.	./.:0:.,.	0/0:13:13,0	./.:0:.,.	0/0:16:16,0	./.:0:.,.	./.:0:.,.	./.:0:.,.	./.:0:.,.	./.:0:.,.	./.:0:.,.	./.:0:.,.	./.:0:.,.	./.:0:.,.
MockRefGenome	106555	.	T	C	.	PASS	AC=3;AF=0.015;DP=634;AV=15.58;NS=24	GT:DP:AD	0/0:10:10,0	0/0:12:12,0	0/1:10:4,6	0/0:76:76,0	./.:0:.,.	0/0:15:15,0	0/1:14:4,10	./.:0:.,.	./.:0:.,.	0/0:11:11,0	./.:0:.,.	./.:0:.,.	./.:0:.,.	./.:0:.,.	./.:0:.,.	./.:0:.,.	./.:0:.,.	./.:0:.,.	./.:0:.,.	./.:0:.,.	./.:0:.,.	./.:0:.,.	./.:0:.,.	./.:0:.,.	./.:0:.,.	./.:0:.,.	./.:0:.,.	./.:0:.,.	./.:0:.,.	0/0:13:13,0	./.:0:.,.	0/0:16:16,0	./.:0:.,.	./.:0:.,.	./.:0:.,.	./.:0:.,.	./.:0:.,.	./.:0:.,.	./.:0:.,.	./.:0:.,.	./.:0:.,.
MockRefGenome	106629	.	T	C	.	PASS	AC=31;AF=0.155;DP=822;AV=16.08;NS=37	GT:DP:AD	0/0:23:22,1	0/1:54:24,30	./.:0:.,.	0/0:36:36,0	0/1:12:6,6	./.:0:.,.	./.:0:.,.	0/1:18:10,8	0/0:23:23,0	1/1:15:0,15	0/1:25:13,12	./.:0:.,.	1/1:19:0,19	0/1:14:7,7	./.:0:.,.	0/1:13:6,7	0/1:12:7,5	./.:0:.,.	./.:0:.,.	./.:0:.,.	./.:0:.,.	./.:0:.,.	./.:0:.,.	./.:0:.,.	./.:0:.,.	./.:0:.,.	./.:0:.,.	./.:0:.,.	1/1:10:0,10	1/1:18:0,18	./.:0:.,.	./.:0:.,.	./.:0:.,.	./.:0:.,.	1/1:16:0,16	0/1:16:7,9	1/1:18:0,18	./.:0:.,.	0/1:22:7,15	0/0:12:12,0	./.:0:.,.
MockRefGenome	106668	.	C	T	.	PASS	AC=12;AF=0.060;DP=807;AV=16.77;NS=35	GT:DP:AD	0/0:25:25,0	0/1:54:30,24	./.:0:.,.	0/0:36:36,0	0/1:11:5,6	./.:0:.,.	./.:0:.,.	0/1:17:8,9	0/0:22:22,0	0/0:15:15,0	0/1:25:12,13	./.:0:.,.	0/0:21:21,0	0/1:14:7,7	./.:0:.,.	0/1:12:7,5	0/1:12:5,7	./.:0:.,.	./.:0:.,.	./.:0:.,.	./.:0:.,.	./.:0:.,.	./.:0:.,.	./.:0:.,.	./.:0:.,.	./.:0:.,.	./.:0:.,.	0/0:10:10,0	0/0:10:10,0	0/0:18:18,0	./.:0:.,.	./.:0:.,.	./.:0:.,.	./.:0:.,.	0/0:16:16,0	0/1:15:8,7	0/0:17:17,0	./.:0:.,.	0/0:22:22,0	./.:0:.,.	./.:0:.,.
MockRefGenome	106686	.	C	T	.	PASS	AC=17;AF=0.085;DP=802;AV=16.35;NS=37	GT:DP:AD	0/0:25:25,0	0/0:54:54,0	./.:0:.,.	0/0:36:36,0	0/1:11:6,5	./.:0:.,.	./.:0:.,.	0/0:17:17,0	1/1:22:0,22	0/1:15:12,3	0/0:25:25,0	./.:0:.,.	0/0:21:21,0	0/0:14:14,0	./.:0:.,.	0/0:12:12,0	0/0:12:12,0	0/1:8:4,4	./.:0:.,.	./.:0:.,.	./.:0:.,.	./.:0:.,.	./.:0:.,.	./.:0:.,.	./.:0:.,.	./.:0:.,.	./.:0:.,.	./.:0:.,.	1/1:10:0,10	1/1:18:0,18	./.:0:.,.	./.:0:.,.	./.:0:.,.	./.:0:.,.	1/1:16:0,16	0/1:15:7,8	0/0:17:17,0	./.:0:.,.	0/1:21:6,15	0/1:12:7,5	./.:0:.,.
MockRefGenome	106704	.	C	T	.	PASS	AC=30;AF=0.150;DP=793;AV=15.79;NS=39	GT:DP:AD	1/1:25:0,25	0/0:54:54,0	./.:0:.,.	1/1:36:0,36	0/0:11:11,0	./.:0:.,.	./.:0:.,.	0/0:17:17,0	0/0:22:22,0	0/0:15:15,0	0/0:24:24,0	./.:0:.,.	0/0:21:21,0	0/0:14:14,0	./.:0:.,.	0/0:12:12,0	0/0:10:10,0	./.:0:.,.	./.:0:.,.	./.:0:.,.	./.:0:.,.	./.:0:.,.	./.:0:.,.	./.:0:.,.	./.:0:.,.	./.:0:.,.	./.:0:.,.	0/0:10:10,0	0/0:10:10,0	0/0:18:18,0	./.:0:.,.	./.:0:.,.	./.:0:.,.	./.:0:.,.	0/0:16:16,0	0/0:15:15,0	0/0:17:17,0	./.:0:.,.	0/1:21:15,6	0/1:12:6,6	./.:0:.,.
MockRefGenome	106707	.	T	C	.	PASS	AC=39;AF=0.195;DP=792;AV=15.87;NS=38	GT:DP:AD	1/1:25:25,0	0/0:53:0,53	./.:0:.,.	1/1:36:36,0	1/0:11:6,5	./.:0:.,.	./.:0:.,.	0/0:17:0,17	1/1:22:22,0	1/0:15:6,9	0/0:24:0,24	./.:0:.,.	0/0:21:0,21	0/0:14:0,14	./.:0:.,.	0/0:12:0,12	0/0:10:0,10	1/0:8:4,4	./.:0:.,.	./.:0:.,.	./.:0:.,.	./.:0:.,.	./.:0:.,.	./.:0:.,.	./.:0:.,.	./.:0:.,.	./.:0:.,.	./.:0:.,.	0/0:10:0,10	0/0:18:0,18	./.:0:.,.	./.:0:.,.	./.:0:.,.	./.:0:.,.	0/0:16:0,16	1/0:15:7,8	0/0:17:0,17	./.:0:.,.	1/0:21:6,15	1/1:12:12,0	./.:0:.,.
MockRefGenome	106737	.	G	A	.	PASS	AC=16;AF=0.080;DP=593;AV=15.93;NS=28	GT:DP:AD	0/0:25:25,0	1/1:53:0,53	./.:0:.,.	0/0:36:36,0	0/1:11:5,6	./.:0:.,.	./.:0:.,.	./.:0:.,.	1/1:22:0,22	./.:0:.,.	./.:0:.,.	./.:0:.,.	./.:0:.,.	./.:0:.,.	./.:0:.,.	./.:0:.,.	1/1:10:0,10	./.:0:.,.	./.:0:.,.	./.:0:.,.	./.:0:.,.	./.:0:.,.	./.:0:.,.	./.:0:.,.	./.:0:.,.	./.:0:.,.	./.:0:.,.	./.:0:.,.	0/0:10:10,0	0/0:16:16,0	./.:0:.,.	./.:0:.,.	./.:0:.,.	./.:0:.,.	0/0:16:16,0	0/1:15:8,7	./.:0:.,.	./.:0:.,.	0/0:21:21,0	0/1:11:7,4	./.:0:.,.
MockRefGenome	106804	.	G	A	.	PASS	AC=33;AF=0.165;DP=745;AV=16.19;NS=37	GT:DP:AD	1/1:24:0,24	0/0:52:52,0	./.:0:.,.	1/1:35:0,35	0/0:15:15,0	./.:0:.,.	./.:0:.,.	0/0:16:16,0	./.:0:.,.	0/0:15:15,0	0/0:24:24,0	./.:0:.,.	0/0:20:20,0	0/0:16:16,0	./.:0:.,.	0/0:12:12,0	0/0:17:17,0	0/0:11:11,0	./.:0:.,.	./.:0:.,.	./.:0:.,.	./.:0:.,.	./.:0:.,.	./.:0:.,.	./.:0:.,.	./.:0:.,.	./.:0:.,.	./.:0:.,.	./.:0:.,.	./.:0:.,.	./.:0:.,.	./.:0:.,.	./.:0:.,.	./.:0:.,.	0/0:24:24,0	0/1:18:7,11	0/0:18:18,0	./.:0:.,.	0/1:22:15,7	./.:0:.,.	./.:0:.,.
MockRefGenome	106840	.	G	A	.	PASS	AC=9;AF=0.045;DP=784;AV=17.06;NS=36	GT:DP:AD	0/0:25:25,0	0/0:53:53,0	./.:0:.,.	0/0:35:35,0	0/1:15:6,9	./.:0:.,.	./.:0:.,.	0/0:17:17,0	./.:0:.,.	0/0:15:15,0	0/0:24:24,0	./.:0:.,.	0/0:21:21,0	0/0:16:16,0	./.:0:.,.	0/0:13:13,0	0/0:18:18,0	0/0:11:11,0	./.:0:.,.	./.:0:.,.	./.:0:.,.	./.:0:.,.	./.:0:.,.	./.:0:.,.	./.:0:.,.	./.:0:.,.	./.:0:.,.	./.:0:.,.	./.:0:.,.	1/1:10:0,10	./.:0:.,.	./.:0:.,.	./.:0:.,.	./.:0:.,.	1/1:24:0,24	0/1:19:7,12	0/0:19:19,0	./.:0:.,.	0/1:22:7,15	./.:0:.,.	./.:0:.,.
MockRefGenome	106879	.	G	A	.	PASS	AC=4;AF=0.020;DP=790;AV=17.28;NS=36	GT:DP:AD	0/0:25:25,0	0/0:54:54,0	./.:0:.,.	0/0:36:36,0	0/0:15:15,0	./.:0:.,.	./.:0:.,.	0/0:18:18,0	./.:0:.,.	0/0:15:15,0	0/0:25:25,0	./.:0:.,.	0/0:21:21,0	0/0:16:16,0	./.:0:.,.	0/0:13:13,0	0/0:18:18,0	0/0:11:11,0	./.:0:.,.	./.:0:.,.	./.:0:.,.	./.:0:.,.	./.:0:.,.	./.:0:.,.	./.:0:.,.	./.:0:.,.	./.:0:.,.	./.:0:.,.	./.:0:.,.	0/0:10:10,0	./.:0:.,.	./.:0:.,.	./.:0:.,.	./.:0:.,.	1/1:24:0,24	0/1:19:7,12	0/0:19:19,0	./.:0:.,.	0/0:22:22,0	./.:0:.,.	./.:0:.,.
MockRefGenome	109092	.	T	C	.	PASS	AC=8;AF=0.040;DP=659;AV=13.65;NS=23	GT:DP:AD	0/1:12:3,9	0/0:23:23,0	./.:0:.,.	0/0:30:30,0	./.:0:.,.	./.:0:.,.	./.:0:.,.	./.:0:.,.	./.:0:.,.	./.:0:.,.	./.:0:.,.	./.:0:.,.	0/0:21:21,0	./.:0:.,.	0/0:21:21,0	./.:0:.,.	0/0:16:16,0	./.:0:.,.	0/0:11:11,0	./.:0:.,.	./.:0:.,.	./.:0:.,.	0/0:11:11,0	0/0:11:11,0	./.:0:.,.	./.:0:.,.	./.:0:.,.	./.:0:.,.	0/1:10:4,6	0/1:10:7,3	./.:0:.,.	1/1:12:0,12	./.:0:.,.	0/0:14:14,0	0/1:13:7,6	./.:0:.,.	./.:0:.,.	./.:0:.,.	./.:0:.,.	0/0:10:10,0	./.:0:.,.
MockRefGenome	109122	.	T	C	.	PASS	AC=7;AF=0.035;DP=679;AV=13.19;NS=26	GT:DP:AD	0/0:12:12,0	0/0:23:23,0	./.:0:.,.	0/0:30:30,0	0/1:8:5,3	./.:0:.,.	./.:0:.,.	./.:0:.,.	./.:0:.,.	./.:0:.,.	./.:0:.,.	./.:0:.,.	0/0:22:22,0	./.:0:.,.	0/0:21:21,0	./.:0:.,.	0/0:16:16,0	./.:0:.,.	0/0:11:11,0	./.:0:.,.	0/0:10:10,0	./.:0:.,.	0/1:11:7,4	0/0:12:12,0	./.:0:.,.	./.:0:.,.	./.:0:.,.	0/1:9:6,3	0/1:10:6,4	0/1:10:3,7	./.:0:.,.	0/0:12:12,0	0/1:9:5,4	0/0:14:14,0	0/0:13:13,0	./.:0:.,.	./.:0:.,.	./.:0:.,.	./.:0:.,.	0/0:10:10,0	./.:0:.,.
MockRefGenome	109137	.	G	A	.	PASS	AC=13;AF=0.065;DP=687;AV=13.27;NS=26	GT:DP:AD	0/1:12:3,9	0/0:23:23,0	./.:0:.,.	0/0:30:30,0	0/1:10:5,5	./.:0:.,.	./.:0:.,.	./.:0:.,.	./.:0:.,.	./.:0:.,.	./.:0:.,.	./.:0:.,.	0/0:22:22,0	./.:0:.,.	0/0:21:21,0	./.:0:.,.	0/0:16:16,0	./.:0:.,.	0/0:11:11,0	./.:0:.,.	0/0:10:10,0	./.:0:.,.	0/1:11:7,4	0/0:12:12,0	./.:0:.,.	./.:0:.,.	./.:0:.,.	0/1:9:6,3	1/1:10:0,10	0/1:10:3,7	./.:0:.,.	1/1:12:0,12	./.:0:.,.	0/0:14:14,0	0/1:14:7,7	./.:0:.,.	./.:0:.,.	./.:0:.,.	./.:0:.,.	0/0:10:10,0	./.:0:.,.
MockRefGenome	110025	.	G	A	.	PASS	AC=9;AF=0.045;DP=1225;AV=16.82;NS=57	GT:DP:AD	0/0:11:11,0	0/0:60:60,0	0/0:21:21,0	0/0:29:29,0	0/0:25:25,0	0/0:21:21,0	./.:0:.,.	0/0:16:16,0	0/0:39:39,0	0/0:26:26,0	0/0:19:19,0	0/1:18:9,9	0/0:22:22,0	0/0:31:31,0	0/0:14:14,0	0/0:17:17,0	0/0:21:21,0	0/0:16:16,0	./.:0:.,.	0/0:12:12,0	0/0:17:17,0	./.:0:.,.	0/0:11:11,0	0/0:12:12,0	./.:0:.,.	0/1:12:4,8	1/1:14:0,14	0/1:17:10,7	0/0:19:19,0	0/0:18:18,0	0/0:11:11,0	./.:0:.,.	0/0:12:12,0	0/0:15:15,0	0/0:15:15,0	0/0:13:13,0	0/0:14:14,0	./.:0:.,.	0/0:12:12,0	0/1:7:4,3	0/1:13:9,4
MockRefGenome	110031	.	G	A	.	PASS	AC=26;AF=0.130;DP=920;AV=15.85;NS=47	GT:DP:AD	0/0:11:11,0	0/1:60:13,47	1/1:21:0,21	./.:0:.,.	0/0:25:25,0	./.:0:.,.	0/0:16:16,0	./.:0:.,.	0/1:37:13,24	./.:0:.,.	./.:0:.,.	0/0:18:18,0	./.:0:.,.	./.:0:.,.	0/1:14:5,9	./.:0:.,.	1/1:21:0,21	1/1:16:0,16	./.:0:.,.	./.:0:.,.	./.:0:.,.	./.:0:.,.	0/1:11:6,5	0/1:12:8,4	0/0:17:17,0	0/0:12:12,0	./.:0:.,.	0/0:17:17,0	0/0:19:19,0	0/0:18:18,0	1/1:11:0,11	./.:0:.,.	0/0:12:12,0	0/0:15:15,0	0/0:15:15,0	0/0:13:13,0	./.:0:.,.	./.:0:.,.	0/0:12:12,0	./.:0:.,.	0/0:13:13,0
MockRefGenome	110243	.	G	A	.	PASS	AC=8;AF=0.040;DP=597;AV=16.88;NS=24	GT:DP:AD	0/0:12:12,0	0/1:82:48,34	./.:0:.,.	0/0:47:47,0	./.:0:.,.	./.:0:.,.	./.:0:.,.	./.:0:.,.	./.:0:.,.	1/1:11:0,11	0/0:11:11,0	./.:0:.,.	1/1:14:0,14	./.:0:.,.	./.:0:.,.	./.:0:.,.	0/1:9:3,6	./.:0:.,.	./.:0:.,.	./.:0:.,.	./.:0:.,.	./.:0:.,.	./.:0:.,.	./.:0:.,.	./.:0:.,.	./.:0:.,.	./.:0:.,.	./.:0:.,.	./.:0:.,.	./.:0:.,.	./.:0:.,.	./.:0:.,.	./.:0:.,.	./.:0:.,.	./.:0:.,.	./.:0:.,.	./.:0:.,.	0/0:11:11,0	./.:0:.,.	0/0:12:12,0	./.:0:.,.
MockRefGenome	110245	.	T	C	.	PASS	AC=5;AF=0.025;DP=597;AV=17.22;NS=23	GT:DP:AD	0/0:12:12,0	0/1:82:52,30	./.:0:.,.	0/0:47:47,0	./.:0:.,.	./.:0:.,.	./.:0:.,.	./.:0:.,.	./.:0:.,.	0/0:11:11,0	1/1:11:0,11	./.:0:.,.	0/0:14:14,0	./.:0:.,.	./.:0:.,.	./.:0:.,.	0/1:9:6,3	./.:0:.,.	./.:0:.,.	./.:0:.,.	./.:0:.,.	./.:0:.,.	./.:0:.,.	./.:0:.,.	./.:0:.,.	./.:0:.,.	./.:0:.,.	./.:0:.,.	./.:0:.,.	./.:0:.,.	./.:0:.,.	./.:0:.,.	./.:0:.,.	./.:0:.,.	./.:0:.,.	./.:0:.,.	./.:0:.,.	0/0:11:11,0	./.:0:.,.	0/0:12:12,0	./.:0:.,.
MockRefGenome	110323	.	G	A	.	PASS	AC=33;AF=0.165;DP=557;AV=16.22;NS=23	GT:DP:AD	1/1:10:10,0	0/0:77:0,77	./.:0:.,.	1/1:45:45,0	./.:0:.,.	./.:0:.,.	./.:0:.,.	./.:0:.,.	./.:0:.,.	0/0:10:0,10	0/0:11:0,11	./.:0:.,.	0/0:13:0,13	./.:0:.,.	./.:0:.,.	./.:0:.,.	./.:0:.,.	./.:0:.,.	./.:0:.,.	./.:0:.,.	./.:0:.,.	./.:0:.,.	./.:0:.,.	./.:0:.,.	./.:0:.,.	./.:0:.,.	./.:0:.,.	./.:0:.,.	./.:0:.,.	./.:0:.,.	./.:0:.,.	./.:0:.,.	./.:0:.,.	./.:0:.,.	./.:0:.,.	./.:0:.,.	./.:0:.,.	1/0:11:7,4	./.:0:.,.	1/1:12:12,0	./.:0:.,.
MockRefGenome	110343	.	G	T	.	PASS	AC=33;AF=0.165;DP=538;AV=16.23;NS=22	GT:DP:AD	1/1:10:10,0	0/0:75:0,75	./.:0:.,.	1/1:45:45,0	./.:0:.,.	./.:0:.,.	./.:0:.,.	./.:0:.,.	./.:0:.,.	0/0:10:0,10	0/0:11:0,11	./.:0:.,.	./.:0:.,.	./.:0:.,.	./.:0:.,.	./.:0:.,.	./.:0:.,.	./.:0:.,.	./.:0:.,.	./.:0:.,.	./.:0:.,.	./.:0:.,.	./.:0:.,.	./.:0:.,.	./.:0:.,.	./.:0:.,.	./.:0:.,.	./.:0:.,.	./.:0:.,.	./.:0:.,.	./.:0:.,.	./.:0:.,.	./.:0:.,.	./.:0:.,.	./.:0:.,.	./.:0:.,.	./.:0:.,.	1/0:11:7,4	./.:0:.,.	1/1:12:12,0	./.:0:.,.
MockRefGenome	110347	.	G	A	.	PASS	AC=31;AF=0.155;DP=548;AV=16.32;NS=22	GT:DP:AD	./.:0:.,.	0/0:75:0,75	./.:0:.,.	1/1:45:45,0	./.:0:.,.	./.:0:.,.	./.:0:.,.	./.:0:.,.	./.:0:.,.	0/0:10:0,10	0/0:11:0,11	./.:0:.,.	0/0:13:0,13	./.:0:.,.	./.:0:.,.	./.:0:.,.	./.:0:.,.	./.:0:.,.	./.:0:.,.	./.:0:.,.	./.:0:.,.	./.:0:.,.	./.:0:.,.	./.:0:.,.	./.:0:.,.	./.:0:.,.	./.:0:.,.	./.:0:.,.	./.:0:.,.	./.:0:.,.	./.:0:.,.	./.:0:.,.	./.:0:.,.	./.:0:.,.	./.:0:.,.	./.:0:.,.	./.:0:.,.	1/0:11:7,4	./.:0:.,.	1/1:12:12,0	./.:0:.,.
MockRefGenome	110356	.	G	T	.	PASS	AC=31;AF=0.155;DP=542;AV=16.43;NS=21	GT:DP:AD	./.:0:.,.	0/0:75:0,75	./.:0:.,.	1/1:45:45,0	./.:0:.,.	./.:0:.,.	./.:0:.,.	./.:0:.,.	./.:0:.,.	./.:0:.,.	0/0:10:0,10	./.:0:.,.	0/0:13:0,13	./.:0:.,.	./.:0:.,.	./.:0:.,.	./.:0:.,.	./.:0:.,.	./.:0:.,.	./.:0:.,.	./.:0:.,.	./.:0:.,.	./.:0:.,.	./.:0:.,.	./.:0:.,.	./.:0:.,.	./.:0:.,.	./.:0:.,.	./.:0:.,.	./.:0:.,.	./.:0:.,.	./.:0:.,.	./.:0:.,.	./.:0:.,.	./.:0:.,.	./.:0:.,.	./.:0:.,.	1/0:11:7,4	./.:0:.,.	1/1:12:12,0	./.:0:.,.
MockRefGenome	110459	.	A	G	.	PASS	AC=9;AF=0.045;DP=549;AV=16.33;NS=21	GT:DP:AD	./.:0:.,.	0/1:75:49,26	./.:0:.,.	0/0:44:44,0	./.:0:.,.	./.:0:.,.	./.:0:.,.	./.:0:.,.	./.:0:.,.	0/1:11:5,6	1/1:11:0,11	./.:0:.,.	0/0:15:15,0	0/1:8:3,5	./.:0:.,.	./.:0:.,.	0/1:9:3,6	./.:0:.,.	./.:0:.,.	./.:0:.,.	./.:0:.,.	./.:0:.,.	./.:0:.,.	./.:0:.,.	./.:0:.,.	./.:0:.,.	./.:0:.,.	./.:0:.,.	./.:0:.,.	./.:0:.,.	./.:0:.,.	./.:0:.,.	./.:0:.,.	./.:0:.,.	./.:0:.,.	./.:0:.,.	./.:0:.,.	0/1:11:7,4	./.:0:.,.	0/0:11:11,0	./.:0:.,.
MockRefGenome	111225	.	G	A	.	PASS	AC=11;AF=0.055;DP=512;AV=17.86;NS=21	GT:DP:AD	./.:0:.,.	0/0:75:75,0	./.:0:.,.	./.:0:.,.	./.:0:.,.	./.:0:.,.	0/0:13:13,0	0/0:17:17,0	./.:0:.,.	0/0:11:11,0	0/0:24:24,0	./.:0:.,.	0/0:21:21,0	0/0:25:25,0	./.:0:.,.	./.:0:.,.	./.:0:.,.	0/0:16:16,0	./.:0:.,.	./.:0:.,.	./.:0:.,.	./.:0:.,.	0/0:11:11,0	./.:0:.,.	./.:0:.,.	./.:0:.,.	./.:0:.,.	./.:0:.,.	./.:0:.,.	./.:0:.,.	1/1:15:0,15	./.:0:.,.	./.:0:.,.	./.:0:.,.	./.:0:.,.	./.:0:.,.	./.:0:.,.	./.:0:.,.	./.:0:.,.	./.:0:.,.	./.:0:.,.
MockRefGenome	111245	.	T	C	.	PASS	AC=3;AF=0.015;DP=515;AV=17.41;NS=22	GT:DP:AD	./.:0:.,.	0/1:75:41,34	./.:0:.,.	./.:0:.,.	./.:0:.,.	./.:0:.,.	0/0:13:13,0	0/0:17:17,0	./.:0:.,.	0/0:11:11,0	0/1:24:12,12	./.:0:.,.	0/0:21:21,0	0/0:25:25,0	./.:0:.,.	0/1:8:5,3	./.:0:.,.	0/0:16:16,0	./.:0:.,.	./.:0:.,.	./.:0:.,.	./.:0:.,.	0/0:11:11,0	./.:0:.,.	./.:0:.,.	./.:0:.,.	./.:0:.,.	./.:0:.,.	./.:0:.,.	./.:0:.,.	0/0:15:15,0	./.:0:.,.	./.:0:.,.	./.:0:.,.	./.:0:.,.	./.:0:.,.	./.:0:.,.	./.:0:.,.	./.:0:.,.	./.:0:.,.	./.:0:.,.
MockRefGenome	111321	.	A	G	.	PASS	AC=5;AF=0.025;DP=504;AV=17.23;NS=22	GT:DP:AD	./.:0:.,.	0/1:74:40,34	./.:0:.,.	./.:0:.,.	./.:0:.,.	./.:0:.,.	0/0:13:13,0	0/0:17:17,0	./.:0:.,.	0/1:11:8,3	0/0:24:24,0	./.:0:.,.	0/0:20:20,0	0/0:25:25,0	./.:0:.,.	0/1:7:3,4	./.:0:.,.	0/1:16:11,5	./.:0:.,.	./.:0:.,.	./.:0:.,.	./.:0:.,.	0/0:11:11,0	./.:0:.,.	./.:0:.,.	./.:0:.,.	./.:0:.,.	./.:0:.,.	./.:0:.,.	./.:0:.,.	0/0:15:15,0	./.:0:.,.	./.:0:.,.	./.:0:.,.	./.:0:.,.	./.:0:.,.	./.:0:.,.	./.:0:.,.	./.:0:.,.	./.:0:.,.	./.:0:.,.
MockRefGenome	111324	.	G	A	.	PASS	AC=5;AF=0.025;DP=501;AV=17.09;NS=22	GT:DP:AD	./.:0:.,.	0/1:74:40,34	./.:0:.,.	./.:0:.,.	./.:0:.,.	./.:0:.,.	0/0:13:13,0	0/0:17:17,0	./.:0:.,.	0/1:11:8,3	0/0:24:24,0	./.:0:.,.	0/0:20:20,0	0/0:25:25,0	./.:0:.,.	0/1:7:3,4	./.:0:.,.	0/1:13:8,5	./.:0:.,.	./.:0:.,.	./.:0:.,.	./.:0:.,.	0/0:11:11,0	./.:0:.,.	./.:0:.,.	./.:0:.,.	./.:0:.,.	./.:0:.,.	./.:0:.,.	./.:0:.,.	0/0:15:15,0	./.:0:.,.	./.:0:.,.	./.:0:.,.	./.:0:.,.	./.:0:.,.	./.:0:.,.	./.:0:.,.	./.:0:.,.	./.:0:.,.	./.:0:.,.
MockRefGenome	111498	.	C	T	.	PASS	AC=7;AF=0.035;DP=587;AV=17.48;NS=23	GT:DP:AD	./.:0:.,.	0/0:75:75,0	./.:0:.,.	./.:0:.,.	./.:0:.,.	./.:0:.,.	1/1:13:0,13	0/0:17:17,0	./.:0:.,.	0/0:11:11,0	0/0:24:24,0	./.:0:.,.	0/0:21:21,0	0/0:25:25,0	./.:0:.,.	./.:0:.,.	./.:0:.,.	0/0:16:16,0	./.:0:.,.	./.:0:.,.	./.:0:.,.	./.:0:.,.	1/1:11:0,11	./.:0:.,.	./.:0:.,.	./.:0:.,.	./.:0:.,.	./.:0:.,.	0/0:10:10,0	./.:0:.,.	0/0:15:15,0	./.:0:.,.	./.:0:.,.	./.:0:.,.	./.:0:.,.	0/0:14:14,0	0/0:17:17,0	./.:0:.,.	./.:0:.,.	./.:0:.,.	./.:0:.,.
MockRefGenome	111587	.	G	C	.	PASS	AC=12;AF=0.060;DP=1366;AV=17.30;NS=67	GT:DP:AD	0/0:21:21,0	0/1:68:35,33	0/0:17:17,0	0/0:30:30,0	0/0:17:17,0	0/0:28:28,0	0/0:13:13,0	0/1:11:7,4	0/0:42:42,0	0/0:17:17,0	0/1:18:11,7	0/0:13:13,0	0/1:19:13,6	0/1:16:8,8	0/0:27:27,0	0/1:17:9,8	0/1:21:11,10	0/1:9:6,3	0/0:14:14,0	0/0:19:19,0	0/0:16:16,0	0/0:12:12,0	0/0:16:16,0	0/0:22:22,0	0/0:17:17,0	./.:0:.,.	0/0:23:23,0	0/0:32:32,0	0/0:12:12,0	0/0:24:24,0	0/0:21:21,0	0/0:13:13,0	0/0:11:11,0	0/0:32:32,0	0/0:12:12,0	0/0:13:13,0	0/0:15:15,0	./.:0:.,.	0/0:11:11,0	0/0:23:23,0	0/0:10:10,0
MockRefGenome	111725	.	A	G	.	PASS	AC=12;AF=0.060;DP=1278;AV=16.68;NS=63	GT:DP:AD	1/1:19:0,19	0/0:61:61,0	0/0:16:16,0	0/0:29:29,0	0/0:17:17,0	0/0:26:26,0	0/0:13:13,0	0/0:11:11,0	0/0:41:41,0	0/0:17:17,0	0/0:18:18,0	0/0:12:12,0	0/0:18:18,0	0/0:16:16,0	0/0:26:26,0	0/0:18:18,0	0/0:20:20,0	./.:0:.,.	0/0:13:13,0	0/0:19:19,0	0/0:15:15,0	0/0:11:11,0	./.:0:.,.	0/0:19:19,0	0/0:15:15,0	./.:0:.,.	0/0:22:22,0	0/0:30:30,0	0/0:11:11,0	0/0:24:24,0	0/0:21:21,0	0/0:12:12,0	0/0:11:11,0	0/0:27:27,0	0/0:10:10,0	0/0:12:12,0	0/0:15:15,0	0/1:7:3,4	0/1:11:4,7	0/1:23:15,8	0/1:9:6,3
MockRefGenome	112880	.	A	G	.	PASS	AC=8;AF=0.040;DP=1049;AV=14.96;NS=54	GT:DP:AD	0/0:15:15,0	0/0:32:32,0	0/0:20:20,0	0/0:14:14,0	./.:0:.,.	0/0:12:12,0	0/0:17:17,0	./.:0:.,.	0/0:36:36,0	0/0:21:21,0	0/0:14:14,0	./.:0:.,.	0/0:16:16,0	0/0:20:20,0	0/0:20:20,0	./.:0:.,.	0/0:15:15,0	0/0:18:18,0	./.:0:.,.	0/0:15:15,0	0/0:11:11,0	./.:0:.,.	0/0:11:11,0	./.:0:.,.	0/0:18:18,0	0/0:14:14,0	0/0:13:13,0	0/0:20:20,0	0/0:12:12,0	0/0:13:13,0	./.:0:.,.	0/0:11:11,0	0/0:12:12,0	0/0:24:24,0	0/0:11:11,0	0/0:10:10,0	0/0:14:14,0	./.:0:.,.	0/0:11:11,0	0/0:12:12,0	0/1:12:9,3
MockRefGenome	112913	.	G	A	.	PASS	AC=8;AF=0.040;DP=1046;AV=15.04;NS=53	GT:DP:AD	0/0:15:15,0	0/0:32:32,0	0/0:20:20,0	0/0:14:14,0	./.:0:.,.	0/0:12:12,0	0/0:17:17,0	./.:0:.,.	0/0:36:36,0	0/1:21:13,8	0/0:14:14,0	./.:0:.,.	0/0:16:16,0	0/0:19:19,0	0/0:20:20,0	./.:0:.,.	0/0:15:15,0	0/0:18:18,0	./.:0:.,.	0/0:15:15,0	0/0:11:11,0	./.:0:.,.	0/0:11:11,0	./.:0:.,.	0/0:18:18,0	0/0:14:14,0	0/0:13:13,0	0/0:20:20,0	0/0:12:12,0	0/0:14:14,0	0/0:10:10,0	0/0:11:11,0	0/0:12:12,0	0/0:24:24,0	./.:0:.,.	0/0:10:10,0	0/0:14:14,0	./.:0:.,.	0/0:11:11,0	0/0:12:12,0	0/1:12:9,3
MockRefGenome	112934	.	A	G	.	PASS	AC=39;AF=0.195;DP=1041;AV=14.44;NS=54	GT:DP:AD	0/1:15:9,6	0/0:32:32,0	0/0:20:20,0	1/1:14:0,14	./.:0:.,.	0/0:12:12,0	0/1:17:9,8	./.:0:.,.	0/1:36:21,15	0/1:21:18,3	./.:0:.,.	./.:0:.,.	0/1:16:12,4	0/0:17:17,0	0/1:20:13,7	./.:0:.,.	0/0:15:15,0	0/0:18:18,0	./.:0:.,.	0/0:15:15,0	0/1:11:5,6	./.:0:.,.	0/0:11:11,0	./.:0:.,.	0/1:18:9,9	0/0:14:14,0	0/1:13:8,5	0/0:20:20,0	0/1:11:3,8	1/1:14:0,14	0/0:10:10,0	1/1:11:0,11	0/1:12:5,7	0/1:24:20,4	0/0:11:11,0	0/1:10:4,6	0/0:14:14,0	./.:0:.,.	./.:0:.,.	0/0:12:12,0	0/1:11:8,3
MockRefGenome	112967	.	G	A	.	PASS	AC=7;AF=0.035;DP=1032;AV=14.85;NS=53	GT:DP:AD	0/0:15:15,0	0/0:32:32,0	0/0:20:20,0	0/0:14:14,0	./.:0:.,.	0/0:12:12,0	0/0:17:17,0	./.:0:.,.	0/0:34:34,0	0/0:21:21,0	0/0:14:14,0	./.:0:.,.	0/0:16:16,0	0/0:17:17,0	0/0:20:20,0	./.:0:.,.	0/0:15:15,0	0/0:18:18,0	./.:0:.,.	0/0:15:15,0	0/0:10:10,0	./.:0:.,.	0/0:11:11,0	./.:0:.,.	0/0:18:18,0	0/0:14:14,0	0/0:12:12,0	0/0:20:20,0	0/0:10:10,0	0/0:14:14,0	./.:0:.,.	0/0:11:11,0	0/0:12:12,0	0/0:24:24,0	0/0:11:11,0	0/0:10:10,0	0/0:14:14,0	./.:0:.,.	0/0:11:11,0	0/0:12:12,0	0/1:11:8,3
MockRefGenome	112976	.	C	T	.	PASS	AC=11;AF=0.055;DP=1026;AV=14.71;NS=52	GT:DP:AD	0/0:15:15,0	0/0:32:32,0	0/0:20:20,0	0/0:14:14,0	./.:0:.,.	0/1:12:6,6	0/0:17:17,0	./.:0:.,.	0/0:34:34,0	0/1:21:18,3	./.:0:.,.	./.:0:.,.	0/0:16:16,0	0/0:17:17,0	0/0:20:20,0	./.:0:.,.	0/0:14:14,0	0/0:18:18,0	./.:0:.,.	0/0:15:15,0	0/0:10:10,0	./.:0:.,.	0/0:10:10,0	./.:0:.,.	0/0:18:18,0	0/0:14:14,0	0/0:12:12,0	0/0:20:20,0	0/1:10:3,7	1/1:14:0,14	./.:0:.,.	1/1:11:0,11	0/0:12:12,0	0/0:24:24,0	0/0:11:11,0	0/1:10:4,6	0/0:14:14,0	./.:0:.,.	0/0:11:11,0	0/0:12:12,0	0/0:11:11,0
MockRefGenome	113068	.	A	G	.	PASS	AC=33;AF=0.165;DP=1088;AV=15.29;NS=49	GT:DP:AD	0/1:23:9,14	0/0:31:31,0	0/0:19:19,0	1/1:41:0,41	./.:0:.,.	0/0:10:10,0	0/0:17:17,0	./.:0:.,.	0/0:33:33,0	./.:0:.,.	./.:0:.,.	./.:0:.,.	0/1:15:11,4	0/0:19:19,0	0/0:20:20,0	./.:0:.,.	0/0:13:13,0	0/0:14:14,0	./.:0:.,.	0/0:12:12,0	0/0:10:10,0	./.:0:.,.	./.:0:.,.	./.:0:.,.	0/0:16:16,0	0/0:13:13,0	0/1:11:7,4	0/0:17:17,0	./.:0:.,.	1/1:14:0,14	./.:0:.,.	1/1:10:0,10	./.:0:.,.	0/0:21:21,0	0/0:10:10,0	./.:0:.,.	0/0:11:11,0	./.:0:.,.	0/1:15:9,6	0/1:17:11,6	0/1:11:8,3
MockRefGenome	113113	.	G	A	.	PASS	AC=34;AF=0.170;DP=1170;AV=15.80;NS=55	GT:DP:AD	0/1:25:10,15	0/0:31:31,0	0/0:20:20,0	1/1:41:0,41	./.:0:.,.	0/0:11:11,0	0/0:18:18,0	./.:0:.,.	0/0:35:35,0	0/0:19:19,0	0/0:14:14,0	./.:0:.,.	0/1:15:11,4	0/0:19:19,0	0/0:20:20,0	./.:0:.,.	0/0:13:13,0	0/0:17:17,0	./.:0:.,.	0/0:15:15,0	0/0:11:11,0	./.:0:.,.	0/0:11:11,0	./.:0:.,.	0/0:17:17,0	0/0:14:14,0	0/0:12:12,0	0/0:19:19,0	0/1:11:3,8	1/1:14:0,14	./.:0:.,.	1/1:10:0,10	0/0:11:11,0	0/0:23:23,0	0/0:11:11,0	0/1:9:4,5	0/0:12:12,0	./.:0:.,.	0/1:15:9,6	0/1:18:12,6	0/1:12:8,4
MockRefGenome	113170	.	C	T	.	PASS	AC=28;AF=0.140;DP=1209;AV=15.53;NS=62	GT:DP:AD	0/1:25:16,9	0/0:32:32,0	0/0:20:20,0	0/1:41:14,27	./.:0:.,.	0/0:12:12,0	0/0:18:18,0	./.:0:.,.	0/0:36:36,0	0/0:21:21,0	0/0:14:14,0	./.:0:.,.	0/0:16:16,0	0/0:20:20,0	0/0:20:20,0	./.:0:.,.	0/0:15:15,0	0/0:17:17,0	./.:0:.,.	0/0:15:15,0	0/0:11:11,0	./.:0:.,.	0/0:11:11,0	./.:0:.,.	0/0:18:18,0	0/0:14:14,0	0/0:12:12,0	0/0:20:20,0	0/0:12:12,0	0/0:14:14,0	./.:0:.,.	0/0:11:11,0	0/0:12:12,0	0/0:24:24,0	0/0:11:11,0	0/0:10:10,0	0/0:14:14,0	./.:0:.,.	0/1:16:11,5	0/1:18:12,6	0/1:13:9,4
MockRefGenome	113223	.	C	T	.	PASS	AC=11;AF=0.055;DP=1012;AV=18.09;NS=44	GT:DP:AD	0/0:16:16,0	./.:0:.,.	0/0:23:23,0	0/0:31:31,0	0/0:15:15,0	0/0:20:20,0	0/0:20:20,0	./.:0:.,.	0/0:25:25,0	./.:0:.,.	./.:0:.,.	0/1:8:5,3	./.:0:.,.	./.:0:.,.	0/0:22:22,0	./.:0:.,.	./.:0:.,.	./.:0:.,.	0/0:15:15,0	0/0:19:19,0	0/0:25:25,0	0/0:16:16,0	0/0:21:21,0	0/0:16:16,0	0/0:25:25,0	./.:0:.,.	0/1:21:16,5	0/1:37:15,22	0/0:41:41,0	0/0:17:17,0	0/0:17:17,0	0/0:16:16,0	0/0:11:11,0	0/0:25:25,0	0/1:13:5,8	0/0:16:16,0	./.:0:.,.	0/0:12:12,0	0/0:18:18,0	0/1:24:12,12	./.:0:.,.
MockRefGenome	113229	.	T	C	.	PASS	AC=12;AF=0.060;DP=1012;AV=17.89;NS=45	GT:DP:AD	0/0:16:16,0	./.:0:.,.	0/0:23:23,0	1/1:31:1,30	0/0:15:15,0	0/0:20:20,0	0/0:20:20,0	./.:0:.,.	0/0:25:25,0	./.:0:.,.	./.:0:.,.	./.:0:.,.	./.:0:.,.	./.:0:.,.	0/0:22:22,0	./.:0:.,.	./.:0:.,.	./.:0:.,.	0/0:15:15,0	0/0:19:19,0	0/0:25:25,0	0/0:16:16,0	0/0:21:21,0	0/0:16:16,0	0/0:25:25,0	./.:0:.,.	0/0:21:21,0	0/0:37:37,0	0/0:41:41,0	0/0:17:17,0	0/0:17:17,0	0/0:16:16,0	0/0:11:11,0	0/0:25:25,0	0/0:13:13,0	0/0:16:16,0	./.:0:.,.	0/0:12:12,0	0/0:18:18,0	0/1:24:12,12	./.:0:.,.
MockRefGenome	113295	.	A	G	.	PASS	AC=45;AF=0.225;DP=987;AV=17.76;NS=42	GT:DP:AD	0/0:15:0,15	./.:0:.,.	1/0:22:17,5	0/0:31:0,31	1/1:14:14,0	1/1:19:19,0	0/0:19:0,19	./.:0:.,.	1/1:24:24,0	./.:0:.,.	./.:0:.,.	./.:0:.,.	./.:0:.,.	./.:0:.,.	1/1:21:21,0	./.:0:.,.	./.:0:.,.	./.:0:.,.	./.:0:.,.	1/1:19:19,0	1/0:24:10,14	1/1:16:16,0	1/0:21:3,18	1/1:15:15,0	1/1:25:25,0	./.:0:.,.	1/0:20:5,15	1/0:37:22,15	1/1:39:39,0	1/1:15:15,0	1/0:17:11,6	1/1:16:16,0	0/0:11:0,11	0/0:25:0,25	1/0:13:8,5	1/1:15:15,0	./.:0:.,.	1/0:11:3,8	1/0:18:11,7	1/0:23:11,12	./.:0:.,.
MockRefGenome	113454	.	T	C	.	PASS	AC=38;AF=0.190;DP=1020;AV=17.19;NS=42	GT:DP:AD	0/0:16:16,0	./.:0:.,.	1/1:21:0,21	0/0:31:31,0	0/1:15:12,3	0/0:20:20,0	1/1:19:0,19	./.:0:.,.	0/1:23:7,16	./.:0:.,.	./.:0:.,.	0/1:8:5,3	./.:0:.,.	./.:0:.,.	1/1:21:0,21	./.:0:.,.	./.:0:.,.	./.:0:.,.	./.:0:.,.	0/0:19:19,0	./.:0:.,.	0/1:16:3,13	0/1:20:15,5	0/1:16:11,5	0/1:24:9,15	./.:0:.,.	1/1:20:0,20	1/1:34:0,34	1/1:37:0,37	0/1:17:6,11	1/1:17:0,17	1/1:15:0,15	0/1:12:6,6	0/1:25:9,16	0/0:13:13,0	0/1:16:8,8	./.:0:.,.	./.:0:.,.	0/1:18:7,11	0/1:24:12,12	0/1:9:4,5
MockRefGenome	113459	.	G	C	.	PASS	AC=5;AF=0.025;DP=1018;AV=18.00;NS=42	GT:DP:AD	0/0:16:16,0	./.:0:.,.	0/0:21:21,0	0/0:31:31,0	0/0:15:15,0	0/0:20:20,0	0/0:19:19,0	./.:0:.,.	0/0:23:23,0	./.:0:.,.	./.:0:.,.	./.:0:.,.	./.:0:.,.	./.:0:.,.	0/0:21:21,0	./.:0:.,.	./.:0:.,.	./.:0:.,.	0/0:14:14,0	0/0:19:19,0	0/0:23:23,0	0/0:16:16,0	0/0:20:20,0	0/0:16:16,0	0/0:24:24,0	./.:0:.,.	0/0:20:20,0	0/0:34:34,0	0/1:37:17,20	0/1:17:6,11	0/0:17:17,0	0/1:15:6,9	0/0:12:12,0	0/0:25:25,0	0/0:13:13,0	0/1:16:8,8	./.:0:.,.	0/0:10:10,0	0/0:18:18,0	0/0:24:24,0	./.:0:.,.
MockRefGenome	113634	.	C	T	.	PASS	AC=9;AF=0.045;DP=835;AV=15.22;NS=37	GT:DP:AD	0/0:18:18,0	0/0:11:11,0	1/1:13:0,13	0/0:47:46,1	./.:0:.,.	0/0:10:10,0	0/0:20:20,0	./.:0:.,.	0/0:29:29,0	./.:0:.,.	./.:0:.,.	0/0:11:11,0	./.:0:.,.	./.:0:.,.	0/1:24:9,15	./.:0:.,.	./.:0:.,.	./.:0:.,.	./.:0:.,.	0/0:10:10,0	0/1:13:8,5	./.:0:.,.	0/1:14:9,5	0/0:13:13,0	0/0:11:11,0	0/0:14:14,0	0/0:15:15,0	0/0:21:21,0	0/0:13:13,0	./.:0:.,.	0/1:11:6,5	0/0:11:11,0	./.:0:.,.	0/1:18:13,5	./.:0:.,.	./.:0:.,.	./.:0:.,.	0/1:10:5,5	./.:0:.,.	0/0:14:14,0	0/0:11:11,0
MockRefGenome	113658	.	G	C	.	PASS	AC=28;AF=0.140;DP=823;AV=14.89;NS=37	GT:DP:AD	0/0:18:18,0	0/0:11:11,0	1/1:13:0,13	0/0:47:46,1	./.:0:.,.	1/1:10:0,10	0/0:20:20,0	./.:0:.,.	0/1:29:15,14	./.:0:.,.	./.:0:.,.	./.:0:.,.	./.:0:.,.	./.:0:.,.	1/1:23:0,23	./.:0:.,.	./.:0:.,.	./.:0:.,.	./.:0:.,.	1/1:10:0,10	1/1:12:0,12	./.:0:.,.	1/1:14:0,14	0/1:12:5,7	0/0:11:11,0	1/1:13:0,13	0/1:15:11,4	0/0:20:20,0	0/1:13:4,9	./.:0:.,.	0/1:11:6,5	1/1:10:0,10	./.:0:.,.	0/1:17:10,7	./.:0:.,.	./.:0:.,.	./.:0:.,.	0/1:10:5,5	./.:0:.,.	0/0:14:14,0	0/1:11:6,5
MockRefGenome	113664	.	C	G	.	PASS	AC=9;AF=0.045;DP=818;AV=14.62;NS=39	GT:DP:AD	0/0:18:18,0	0/0:11:11,0	0/0:13:13,0	0/0:47:47,0	./.:0:.,.	0/0:10:10,0	0/0:20:20,0	./.:0:.,.	0/0:28:28,0	./.:0:.,.	./.:0:.,.	0/0:10:10,0	./.:0:.,.	./.:0:.,.	0/0:23:23,0	./.:0:.,.	./.:0:.,.	./.:0:.,.	./.:0:.,.	0/0:10:10,0	0/0:12:12,0	./.:0:.,.	0/0:14:14,0	0/0:12:12,0	0/0:11:11,0	0/0:13:13,0	0/0:15:15,0	0/0:20:20,0	0/0:13:13,0	./.:0:.,.	0/0:11:11,0	0/0:10:10,0	./.:0:.,.	0/0:16:16,0	./.:0:.,.	./.:0:.,.	./.:0:.,.	0/1:10:5,5	0/1:7:3,4	0/1:14:7,7	0/1:11:5,6
MockRefGenome	113716	.	C	G	.	PASS	AC=14;AF=0.070;DP=788;AV=14.91;NS=32	GT:DP:AD	0/0:13:13,0	./.:0:.,.	0/0:13:13,0	0/0:45:45,0	./.:0:.,.	0/0:10:10,0	0/0:18:18,0	./.:0:.,.	0/1:26:13,13	./.:0:.,.	./.:0:.,.	0/1:11:8,3	./.:0:.,.	./.:0:.,.	1/1:23:0,23	./.:0:.,.	./.:0:.,.	./.:0:.,.	./.:0:.,.	0/0:10:10,0	0/1:13:8,5	./.:0:.,.	0/1:15:10,5	0/1:12:4,8	./.:0:.,.	1/1:14:0,14	0/1:15:11,4	0/0:19:19,0	0/0:14:14,0	./.:0:.,.	./.:0:.,.	0/0:12:12,0	./.:0:.,.	0/1:15:12,3	0/0:10:10,0	./.:0:.,.	./.:0:.,.	0/1:10:5,5	./.:0:.,.	0/0:11:11,0	0/1:9:4,5
MockRefGenome	113719	.	G	A	.	PASS	AC=19;AF=0.095;DP=791;AV=14.70;NS=33	GT:DP:AD	0/0:13:13,0	./.:0:.,.	0/0:13:13,0	0/0:45:45,0	./.:0:.,.	0/0:10:10,0	0/0:18:18,0	./.:0:.,.	0/1:26:13,13	./.:0:.,.	./.:0:.,.	0/1:11:8,3	./.:0:.,.	./.:0:.,.	1/1:23:0,23	./.:0:.,.	./.:0:.,.	./.:0:.,.	./.:0:.,.	0/0:10:10,0	0/1:13:8,5	./.:0:.,.	0/1:15:10,5	0/1:12:4,8	./.:0:.,.	1/1:14:0,14	0/1:15:11,4	0/0:19:19,0	0/1:14:4,10	./.:0:.,.	./.:0:.,.	0/1:12:3,9	./.:0:.,.	0/1:15:12,3	1/1:10:0,10	./.:0:.,.	./.:0:.,.	0/1:10:5,5	./.:0:.,.	0/0:11:11,0	0/1:10:5,5
MockRefGenome	113743	.	A	C	.	PASS	AC=45;AF=0.225;DP=796;AV=14.39;NS=36	GT:DP:AD	1/1:13:13,0	./.:0:.,.	0/0:13:0,13	1/1:45:44,1	./.:0:.,.	1/0:10:7,3	1/1:18:18,0	./.:0:.,.	1/0:26:13,13	./.:0:.,.	./.:0:.,.	1/0:11:8,3	./.:0:.,.	./.:0:.,.	0/0:23:0,23	./.:0:.,.	./.:0:.,.	./.:0:.,.	./.:0:.,.	./.:0:.,.	1/0:13:3,10	./.:0:.,.	1/0:15:10,5	1/0:12:4,8	1/0:9:4,5	0/0:14:0,14	1/0:15:11,4	1/1:19:19,0	0/0:14:0,14	./.:0:.,.	1/0:9:4,5	1/0:12:3,9	./.:0:.,.	1/0:16:12,4	0/0:10:0,10	./.:0:.,.	./.:0:.,.	1/0:10:5,5	./.:0:.,.	1/1:11:11,0	1/0:10:5,5
MockRefGenome	113782	.	G	C	.	PASS	AC=18;AF=0.090;DP=818;AV=14.69;NS=36	GT:DP:AD	0/0:15:15,0	0/0:11:11,0	0/0:13:13,0	0/0:47:47,0	./.:0:.,.	0/0:10:10,0	0/0:18:18,0	./.:0:.,.	0/1:26:13,13	./.:0:.,.	./.:0:.,.	0/1:11:8,3	./.:0:.,.	./.:0:.,.	1/1:23:0,23	./.:0:.,.	./.:0:.,.	./.:0:.,.	./.:0:.,.	0/0:10:10,0	0/1:13:8,5	./.:0:.,.	0/1:15:10,5	0/0:12:12,0	./.:0:.,.	1/1:14:0,14	0/1:15:11,4	0/0:19:19,0	1/1:14:0,14	./.:0:.,.	0/0:10:10,0	0/1:12:3,9	./.:0:.,.	0/1:17:12,5	1/1:10:0,10	./.:0:.,.	./.:0:.,.	0/1:10:5,5	./.:0:.,.	0/0:12:12,0	0/1:10:5,5
MockRefGenome	114034	.	G	A	.	PASS	AC=47;AF=0.235;DP=1252;AV=16.36;NS=58	GT:DP:AD	1/1:31:0,31	0/0:32:32,0	0/0:23:23,0	0/1:81:47,34	1/1:15:0,15	0/0:13:13,0	./.:0:.,.	0/1:11:6,5	0/0:40:40,0	0/0:13:13,0	0/0:13:13,0	./.:0:.,.	./.:0:.,.	0/0:14:14,0	0/0:12:12,0	./.:0:.,.	./.:0:.,.	0/1:11:8,3	0/0:14:14,0	./.:0:.,.	0/0:14:14,0	./.:0:.,.	./.:0:.,.	0/0:13:13,0	0/0:12:12,0	0/0:13:13,0	0/0:19:19,0	0/0:12:12,0	1/1:15:0,15	1/1:19:0,19	0/0:19:19,0	0/0:12:12,0	./.:0:.,.	1/1:14:0,14	./.:0:.,.	./.:0:.,.	./.:0:.,.	./.:0:.,.	./.:0:.,.	0/1:20:9,11	0/1:6:3,3
MockRefGenome	114064	.	T	A	.	PASS	AC=7;AF=0.035;DP=1282;AV=16.95;NS=62	GT:DP:AD	0/0:31:31,0	0/0:32:32,0	0/0:23:23,0	0/0:82:82,0	0/1:16:9,7	0/0:13:13,0	0/0:10:10,0	0/0:12:12,0	0/0:41:41,0	0/0:14:14,0	0/0:13:13,0	./.:0:.,.	0/0:12:12,0	0/0:14:14,0	0/0:12:12,0	./.:0:.,.	./.:0:.,.	0/0:11:11,0	0/0:14:14,0	./.:0:.,.	0/0:14:14,0	./.:0:.,.	./.:0:.,.	0/0:13:13,0	0/0:12:12,0	0/0:13:13,0	0/0:19:19,0	0/0:12:12,0	1/1:18:0,18	0/1:19:5,14	0/0:19:19,0	0/0:12:12,0	0/0:13:13,0	0/0:15:15,0	./.:0:.,.	0/1:9:5,4	./.:0:.,.	./.:0:.,.	0/0:15:15,0	0/0:20:20,0	./.:0:.,.
MockRefGenome	114115	.	A	G	.	PASS	AC=51;AF=0.255;DP=1339;AV=16.82;NS=65	GT:DP:AD	0/0:31:31,0	0/1:32:11,21	0/0:24:24,0	0/1:82:35,47	0/0:19:19,0	1/1:13:0,13	./.:0:.,.	0/1:12:5,7	0/1:43:23,20	0/1:14:7,7	0/1:14:6,8	./.:0:.,.	./.:0:.,.	0/1:15:10,5	0/1:13:7,6	./.:0:.,.	./.:0:.,.	0/1:13:6,7	0/1:15:4,11	./.:0:.,.	./.:0:.,.	./.:0:.,.	./.:0:.,.	0/0:13:13,0	0/0:12:12,0	./.:0:.,.	0/1:20:12,8	0/1:12:7,5	0/0:18:18,0	0/0:20:20,0	0/0:19:19,0	0/0:13:13,0	./.:0:.,.	1/1:17:0,17	0/0:11:11,0	./.:0:.,.	0/1:10:4,6	./.:0:.,.	0/1:15:8,7	0/1:21:11,10	0/1:7:3,4
MockRefGenome	114127	.	T	C	.	PASS	AC=41;AF=0.205;DP=1357;AV=18.02;NS=58	GT:DP:AD	0/0:31:31,0	0/1:32:21,11	1/1:24:0,24	0/0:82:82,0	0/1:20:11,9	0/0:13:13,0	./.:0:.,.	1/1:12:0,12	0/0:44:44,0	0/1:14:7,7	0/1:14:8,6	./.:0:.,.	./.:0:.,.	0/1:15:5,10	0/1:13:6,7	./.:0:.,.	./.:0:.,.	0/1:14:8,6	0/1:15:11,4	./.:0:.,.	./.:0:.,.	./.:0:.,.	./.:0:.,.	1/1:13:0,13	1/1:12:0,12	./.:0:.,.	0/1:21:8,13	0/1:13:6,7	1/1:18:0,18	0/1:20:6,14	1/1:20:0,20	1/1:16:0,16	./.:0:.,.	0/0:17:17,0	1/1:13:0,13	0/1:9:5,4	./.:0:.,.	./.:0:.,.	0/1:16:11,5	0/0:21:21,0	./.:0:.,.
MockRefGenome	114157	.	C	G	.	PASS	AC=50;AF=0.250;DP=1369;AV=16.93;NS=68	GT:DP:AD	0/1:31:15,16	0/1:32:19,13	0/0:24:24,0	0/1:82:35,47	0/0:20:20,0	1/1:13:0,13	0/0:12:12,0	0/0:12:12,0	1/1:46:0,46	./.:0:.,.	0/1:14:6,8	./.:0:.,.	0/0:12:12,0	0/1:16:11,5	0/0:13:13,0	./.:0:.,.	./.:0:.,.	0/1:14:6,8	0/1:16:4,12	./.:0:.,.	./.:0:.,.	./.:0:.,.	./.:0:.,.	0/0:14:14,0	0/0:12:12,0	./.:0:.,.	0/1:21:13,8	0/0:13:13,0	0/0:19:19,0	0/0:20:20,0	0/0:20:20,0	0/0:18:18,0	0/0:13:13,0	0/0:17:17,0	0/1:14:11,3	./.:0:.,.	0/0:11:11,0	./.:0:.,.	0/1:17:9,8	0/1:21:15,6	0/1:7:3,4
MockRefGenome	114172	.	C	T	.	PASS	AC=31;AF=0.155;DP=1367;AV=17.20;NS=66	GT:DP:AD	0/1:31:16,15	0/0:32:32,0	0/0:24:24,0	0/1:82:47,35	0/0:20:20,0	0/0:13:13,0	0/0:12:12,0	0/0:12:12,0	0/0:45:44,1	0/0:14:14,0	0/0:14:14,0	./.:0:.,.	0/0:12:12,0	0/0:16:16,0	0/0:13:13,0	./.:0:.,.	./.:0:.,.	0/0:14:14,0	0/0:16:16,0	./.:0:.,.	0/0:14:14,0	./.:0:.,.	./.:0:.,.	0/0:14:14,0	0/0:12:12,0	0/0:14:14,0	0/0:21:21,0	0/0:13:13,0	0/0:19:19,0	0/0:20:20,0	0/0:20:20,0	0/0:18:18,0	0/0:13:13,0	0/0:17:17,0	0/0:14:14,0	./.:0:.,.	0/0:11:11,0	./.:0:.,.	0/1:17:14,3	0/1:21:10,11	0/1:7:4,3
MockRefGenome	114567	.	G	A	.	PASS	AC=29;AF=0.145;DP=857;AV=15.97;NS=33	GT:DP:AD	./.:0:.,.	0/0:48:48,0	1/1:26:0,26	0/0:49:49,0	1/1:11:0,11	./.:0:.,.	./.:0:.,.	0/0:16:16,0	1/1:21:0,21	0/0:13:13,0	0/0:13:13,0	./.:0:.,.	0/0:12:12,0	0/0:21:21,0	./.:0:.,.	0/0:11:11,0	./.:0:.,.	0/0:15:15,0	./.:0:.,.	./.:0:.,.	./.:0:.,.	./.:0:.,.	1/1:11:0,11	1/1:12:0,12	1/1:14:0,14	1/1:14:0,14	1/1:17:0,17	1/1:12:0,12	1/1:14:0,14	1/1:15:0,15	1/1:10:0,10	./.:0:.,.	./.:0:.,.	./.:0:.,.	./.:0:.,.	1/1:13:0,13	0/0:12:12,0	./.:0:.,.	0/1:8:3,5	0/1:9:4,5	./.:0:.,.
MockRefGenome	114655	.	A	G	.	PASS	AC=6;AF=0.030;DP=845;AV=16.32;NS=31	GT:DP:AD	./.:0:.,.	0/0:46:46,0	0/0:26:26,0	0/0:49:49,0	1/1:11:0,11	./.:0:.,.	./.:0:.,.	0/0:16:16,0	0/0:20:20,0	0/0:13:13,0	0/0:13:13,0	./.:0:.,.	0/0:12:12,0	0/0:21:21,0	./.:0:.,.	0/0:11:11,0	./.:0:.,.	0/0:15:15,0	./.:0:.,.	./.:0:.,.	./.:0:.,.	./.:0:.,.	0/0:11:11,0	0/0:12:12,0	0/0:14:14,0	0/0:14:14,0	0/0:16:16,0	0/0:12:12,0	1/1:13:0,13	0/0:15:15,0	0/0:10:10,0	./.:0:.,.	./.:0:.,.	./.:0:.,.	./.:0:.,.	0/1:13:9,4	0/0:12:12,0	./.:0:.,.	./.:0:.,.	./.:0:.,.	./.:0:.,.
MockRefGenome	114827	.	G	A	.	PASS	AC=17;AF=0.085;DP=841;AV=15.19;NS=37	GT:DP:AD	./.:0:.,.	0/1:48:29,19	0/0:26:26,0	0/0:49:49,0	0/0:11:11,0	./.:0:.,.	./.:0:.,.	0/1:16:11,5	0/0:21:21,0	0/1:13:3,10	1/1:13:0,13	./.:0:.,.	0/0:12:12,0	0/0:21:20,1	./.:0:.,.	0/0:11:11,0	./.:0:.,.	0/1:14:7,7	./.:0:.,.	./.:0:.,.	./.:0:.,.	./.:0:.,.	0/0:11:11,0	0/0:12:12,0	0/0:14:14,0	0/0:14:14,0	0/0:17:17,0	0/0:12:12,0	0/0:14:14,0	0/0:15:15,0	0/0:10:10,0	./.:0:.,.	./.:0:.,.	./.:0:.,.	./.:0:.,.	0/0:13:13,0	0/1:12:8,4	./.:0:.,.	./.:0:.,.	./.:0:.,.	./.:0:.,.
MockRefGenome	115552	.	G	A	.	PASS	AC=8;AF=0.040;DP=959;AV=16.39;NS=36	GT:DP:AD	0/0:19:19,0	0/0:56:56,0	0/0:16:16,0	0/0:39:39,0	./.:0:.,.	./.:0:.,.	0/0:17:17,0	./.:0:.,.	0/0:46:46,0	./.:0:.,.	./.:0:.,.	./.:0:.,.	./.:0:.,.	./.:0:.,.	0/0:21:21,0	./.:0:.,.	0/0:12:12,0	./.:0:.,.	./.:0:.,.	./.:0:.,.	./.:0:.,.	./.:0:.,.	0/0:19:19,0	0/0:11:11,0	0/0:15:15,0	0/0:10:10,0	0/0:11:11,0	0/0:17:17,0	1/1:13:0,13	1/1:15:0,15	./.:0:.,.	1/1:11:0,11	./.:0:.,.	0/0:17:17,0	0/1:14:10,4	./.:0:.,.	0/0:11:11,0	./.:0:.,.	0/0:12:12,0	0/0:16:16,0	0/0:12:12,0
MockRefGenome	115756	.	T	G	.	PASS	AC=34;AF=0.170;DP=916;AV=15.61;NS=36	GT:DP:AD	0/0:18:18,0	0/0:50:50,0	1/1:15:0,15	0/0:38:38,0	./.:0:.,.	./.:0:.,.	1/1:17:0,17	0/0:11:11,0	1/1:42:0,42	./.:0:.,.	./.:0:.,.	./.:0:.,.	./.:0:.,.	./.:0:.,.	1/1:21:1,20	./.:0:.,.	0/0:12:12,0	./.:0:.,.	./.:0:.,.	./.:0:.,.	./.:0:.,.	./.:0:.,.	1/1:17:0,17	1/1:11:0,11	1/1:14:0,14	1/1:10:0,10	1/1:11:0,11	1/1:15:0,15	0/0:13:13,0	0/0:15:15,0	./.:0:.,.	0/0:11:11,0	./.:0:.,.	1/1:16:0,16	0/0:14:14,0	./.:0:.,.	0/0:11:11,0	./.:0:.,.	0/1:12:7,5	1/1:14:0,14	0/1:11:4,7
MockRefGenome	115908	.	C	T	.	PASS	AC=24;AF=0.120;DP=1050;AV=16.53;NS=43	GT:DP:AD	0/1:33:24,9	0/0:54:54,0	0/0:11:11,0	0/1:90:33,57	./.:0:.,.	./.:0:.,.	./.:0:.,.	./.:0:.,.	0/0:19:19,0	0/0:14:14,0	0/0:15:15,0	0/0:13:13,0	./.:0:.,.	0/0:11:11,0	./.:0:.,.	0/0:12:12,0	0/0:10:10,0	./.:0:.,.	./.:0:.,.	./.:0:.,.	./.:0:.,.	./.:0:.,.	./.:0:.,.	0/0:10:10,0	./.:0:.,.	0/0:10:10,0	./.:0:.,.	0/0:21:21,0	0/0:13:13,0	0/0:12:12,0	./.:0:.,.	0/0:11:11,0	./.:0:.,.	0/0:10:10,0	./.:0:.,.	0/0:12:12,0	./.:0:.,.	./.:0:.,.	0/1:9:3,6	./.:0:.,.	./.:0:.,.
MockRefGenome	115917	.	C	G	.	PASS	AC=42;AF=0.210;DP=1042;AV=16.05;NS=44	GT:DP:AD	1/0:33:9,24	1/0:54:11,43	0/0:11:0,11	1/1:89:89,0	./.:0:.,.	./.:0:.,.	./.:0:.,.	./.:0:.,.	0/0:19:0,19	0/0:14:0,14	./.:0:.,.	1/0:13:9,4	./.:0:.,.	./.:0:.,.	./.:0:.,.	0/0:12:0,12	0/0:10:0,10	./.:0:.,.	./.:0:.,.	./.:0:.,.	./.:0:.,.	./.:0:.,.	./.:0:.,.	1/0:10:7,3	1/0:9:6,3	0/0:10:0,10	./.:0:.,.	1/0:21:4,17	0/0:13:0,13	0/0:12:0,12	./.:0:.,.	0/0:11:0,11	1/0:7:3,4	0/0:10:0,10	./.:0:.,.	0/0:12:0,12	./.:0:.,.	./.:0:.,.	1/0:9:6,3	1/0:13:7,6	1/0:8:3,5
MockRefGenome	115941	.	T	C	.	PASS	AC=17;AF=0.085;DP=1037;AV=16.40;NS=42	GT:DP:AD	0/0:33:33,0	0/1:54:26,28	0/0:11:11,0	0/0:87:87,0	./.:0:.,.	./.:0:.,.	./.:0:.,.	0/1:6:3,3	0/0:19:19,0	1/1:14:0,14	0/1:15:7,8	0/0:13:13,0	./.:0:.,.	0/1:11:6,5	./.:0:.,.	0/1:12:5,7	1/1:10:0,10	./.:0:.,.	./.:0:.,.	./.:0:.,.	./.:0:.,.	./.:0:.,.	0/0:10:10,0	0/0:10:10,0	./.:0:.,.	0/0:10:10,0	./.:0:.,.	0/0:21:21,0	0/0:13:13,0	0/0:12:12,0	./.:0:.,.	0/0:11:11,0	./.:0:.,.	0/0:10:10,0	./.:0:.,.	0/0:12:12,0	./.:0:.,.	./.:0:.,.	./.:0:.,.	0/0:13:13,0	./.:0:.,.
MockRefGenome	115992	.	G	A	.	PASS	AC=25;AF=0.125;DP=823;AV=16.39;NS=36	GT:DP:AD	0/1:33:24,9	0/0:51:51,0	0/0:10:10,0	0/1:82:30,52	./.:0:.,.	./.:0:.,.	./.:0:.,.	./.:0:.,.	0/0:19:19,0	./.:0:.,.	./.:0:.,.	0/0:13:13,0	./.:0:.,.	./.:0:.,.	./.:0:.,.	./.:0:.,.	0/0:10:10,0	0/0:10:10,0	./.:0:.,.	./.:0:.,.	./.:0:.,.	./.:0:.,.	0/1:9:3,6	0/0:10:10,0	./.:0:.,.	./.:0:.,.	./.:0:.,.	0/0:20:20,0	0/0:13:13,0	0/0:11:11,0	./.:0:.,.	0/1:10:7,3	./.:0:.,.	./.:0:.,.	./.:0:.,.	0/1:10:4,6	./.:0:.,.	./.:0:.,.	./.:0:.,.	./.:0:.,.	./.:0:.,.
MockRefGenome	116042	.	A	G	.	PASS	AC=14;AF=0.070;DP=850;AV=14.75;NS=32	GT:DP:AD	0/0:30:30,0	0/0:43:43,0	1/1:11:0,11	0/0:61:61,0	./.:0:.,.	./.:0:.,.	./.:0:.,.	./.:0:.,.	0/1:18:7,11	0/0:12:12,0	0/0:13:13,0	0/1:12:9,3	./.:0:.,.	0/0:10:10,0	./.:0:.,.	0/0:10:10,0	0/0:10:10,0	0/0:12:12,0	0/1:9:4,5	./.:0:.,.	./.:0:.,.	./.:0:.,.	0/1:10:3,7	0/1:10:7,3	./.:0:.,.	0/1:10:7,3	./.:0:.,.	0/1:21:4,17	0/0:13:13,0	0/0:12:12,0	./.:0:.,.	0/1:9:3,6	./.:0:.,.	./.:0:.,.	./.:0:.,.	0/0:12:12,0	./.:0:.,.	./.:0:.,.	0/1:9:6,3	./.:0:.,.	./.:0:.,.
MockRefGenome	116055	.	T	C	.	PASS	AC=32;AF=0.160;DP=852;AV=15.19;NS=31	GT:DP:AD	0/1:33:9,24	1/1:44:0,44	0/0:11:11,0	0/0:61:61,0	./.:0:.,.	./.:0:.,.	./.:0:.,.	./.:0:.,.	0/0:18:18,0	1/1:12:0,12	1/1:13:0,13	0/1:12:3,9	./.:0:.,.	1/1:10:0,10	./.:0:.,.	1/1:10:0,10	1/1:10:0,10	./.:0:.,.	./.:0:.,.	./.:0:.,.	./.:0:.,.	./.:0:.,.	./.:0:.,.	0/0:10:10,0	./.:0:.,.	0/1:10:3,7	./.:0:.,.	0/0:21:21,0	1/1:13:0,13	1/1:12:0,12	./.:0:.,.	./.:0:.,.	./.:0:.,.	0/1:9:6,3	./.:0:.,.	1/1:12:0,12	./.:0:.,.	./.:0:.,.	./.:0:.,.	./.:0:.,.	./.:0:.,.
MockRefGenome	116060	.	T	A	.	PASS	AC=9;AF=0.045;DP=863;AV=15.63;NS=30	GT:DP:AD	0/0:33:33,0	0/0:44:44,0	1/1:11:0,11	0/0:62:62,0	./.:0:.,.	./.:0:.,.	./.:0:.,.	./.:0:.,.	0/1:18:11,7	0/0:12:12,0	0/0:13:13,0	0/0:12:12,0	./.:0:.,.	0/0:10:10,0	./.:0:.,.	0/0:11:11,0	0/0:10:10,0	0/0:12:12,0	./.:0:.,.	./.:0:.,.	./.:0:.,.	./.:0:.,.	0/1:10:3,7	0/1:10:3,7	./.:0:.,.	0/0:10:10,0	./.:0:.,.	0/1:20:16,4	0/0:13:13,0	0/0:12:12,0	./.:0:.,.	./.:0:.,.	./.:0:.,.	./.:0:.,.	./.:0:.,.	0/0:12:12,0	./.:0:.,.	./.:0:.,.	./.:0:.,.	./.:0:.,.	./.:0:.,.
MockRefGenome	116070	.	T	C	.	PASS	AC=25;AF=0.125;DP=870;AV=15.57;NS=30	GT:DP:AD	0/0:33:33,0	0/1:44:16,28	0/0:11:11,0	0/0:62:62,0	./.:0:.,.	./.:0:.,.	./.:0:.,.	./.:0:.,.	0/0:18:18,0	1/1:13:0,13	1/1:13:0,13	1/1:13:0,13	./.:0:.,.	1/1:10:0,10	./.:0:.,.	./.:0:.,.	1/1:10:0,10	./.:0:.,.	0/1:9:4,5	./.:0:.,.	./.:0:.,.	./.:0:.,.	0/0:10:10,0	0/1:10:7,3	./.:0:.,.	1/1:10:0,10	./.:0:.,.	0/1:21:4,17	0/1:13:8,5	0/0:12:12,0	./.:0:.,.	0/1:10:4,6	./.:0:.,.	./.:0:.,.	./.:0:.,.	0/0:12:12,0	./.:0:.,.	./.:0:.,.	./.:0:.,.	./.:0:.,.	./.:0:.,.
MockRefGenome	116088	.	T	A	.	PASS	AC=16;AF=0.080;DP=878;AV=15.35;NS=31	GT:DP:AD	0/1:33:24,9	0/0:44:44,0	0/0:11:11,0	1/1:63:1,62	./.:0:.,.	./.:0:.,.	./.:0:.,.	./.:0:.,.	0/0:18:18,0	0/0:13:13,0	0/0:13:13,0	0/0:13:13,0	./.:0:.,.	0/0:10:10,0	./.:0:.,.	0/0:12:12,0	0/0:10:10,0	./.:0:.,.	./.:0:.,.	./.:0:.,.	./.:0:.,.	./.:0:.,.	./.:0:.,.	0/0:10:10,0	0/0:10:10,0	0/0:10:10,0	./.:0:.,.	0/0:20:20,0	0/0:13:13,0	0/0:12:12,0	./.:0:.,.	0/0:10:10,0	./.:0:.,.	./.:0:.,.	./.:0:.,.	0/0:12:12,0	./.:0:.,.	./.:0:.,.	0/1:9:3,6	./.:0:.,.	./.:0:.,.
MockRefGenome	116142	.	C	T	.	PASS	AC=9;AF=0.045;DP=903;AV=15.50;NS=32	GT:DP:AD	0/0:33:33,0	0/0:44:44,0	0/0:11:11,0	0/0:63:62,1	./.:0:.,.	./.:0:.,.	./.:0:.,.	./.:0:.,.	0/1:19:12,7	0/0:14:14,0	0/0:13:13,0	0/0:13:13,0	./.:0:.,.	0/0:11:11,0	./.:0:.,.	0/0:12:12,0	0/0:11:11,0	0/0:12:12,0	0/1:9:5,4	./.:0:.,.	./.:0:.,.	./.:0:.,.	0/1:10:3,7	0/1:10:3,7	0/1:10:3,7	0/1:10:7,3	./.:0:.,.	0/1:21:17,4	0/0:13:13,0	0/0:12:12,0	./.:0:.,.	0/0:11:11,0	./.:0:.,.	0/0:10:10,0	./.:0:.,.	0/0:13:13,0	./.:0:.,.	./.:0:.,.	./.:0:.,.	./.:0:.,.	./.:0:.,.
MockRefGenome	116579	.	C	G	.	PASS	AC=21;AF=0.105;DP=939;AV=15.67;NS=45	GT:DP:AD	0/0:16:16,0	0/0:12:12,0	0/0:32:32,0	0/0:42:42,0	0/1:17:9,8	0/0:10:10,0	0/0:25:25,0	./.:0:.,.	0/1:31:16,15	./.:0:.,.	./.:0:.,.	0/1:17:10,7	./.:0:.,.	./.:0:.,.	1/1:16:0,16	./.:0:.,.	./.:0:.,.	./.:0:.,.	./.:0:.,.	0/0:12:12,0	0/1:7:3,4	0/1:14:9,5	0/1:18:15,3	0/0:16:16,0	0/0:18:18,0	1/1:18:0,18	0/1:18:8,10	0/0:27:27,0	./.:0:.,.	0/1:19:11,8	0/0:17:17,0	0/1:18:12,6	./.:0:.,.	0/1:14:11,3	1/1:13:0,13	0/1:11:4,7	./.:0:.,.	./.:0:.,.	0/0:11:11,0	0/0:15:15,0	0/1:11:6,5
MockRefGenome	116582	.	C	T	.	PASS	AC=5;AF=0.025;DP=939;AV=16.09;NS=43	GT:DP:AD	0/0:16:16,0	0/0:12:12,0	0/0:32:32,0	0/0:42:42,0	0/1:17:9,8	0/0:10:10,0	0/0:25:25,0	./.:0:.,.	0/0:31:31,0	./.:0:.,.	./.:0:.,.	0/0:17:17,0	./.:0:.,.	./.:0:.,.	0/0:15:15,0	./.:0:.,.	./.:0:.,.	./.:0:.,.	./.:0:.,.	0/0:12:12,0	./.:0:.,.	0/0:14:14,0	0/0:18:18,0	0/0:16:16,0	0/0:18:18,0	0/0:18:18,0	0/0:18:18,0	0/0:27:27,0	./.:0:.,.	0/1:19:11,8	0/0:17:17,0	0/1:18:12,6	0/0:11:11,0	0/0:14:14,0	0/0:13:13,0	0/1:11:4,7	./.:0:.,.	./.:0:.,.	0/0:12:12,0	0/0:15:15,0	0/0:11:11,0
MockRefGenome	116618	.	T	G	.	PASS	AC=54;AF=0.270;DP=911;AV=15.57;NS=42	GT:DP:AD	1/1:16:16,0	1/1:12:12,0	0/0:31:0,31	1/1:42:42,0	1/0:17:9,8	./.:0:.,.	1/1:23:23,0	./.:0:.,.	1/0:31:16,15	./.:0:.,.	./.:0:.,.	1/0:17:10,7	./.:0:.,.	./.:0:.,.	0/0:14:0,14	./.:0:.,.	./.:0:.,.	./.:0:.,.	./.:0:.,.	1/0:10:5,5	./.:0:.,.	1/0:14:5,9	1/0:18:15,3	1/0:16:8,8	1/0:16:9,7	0/0:18:0,18	1/0:17:7,10	1/1:27:27,0	./.:0:.,.	1/0:18:10,8	1/0:17:10,7	1/0:16:10,6	./.:0:.,.	1/0:13:10,3	0/0:12:0,12	1/0:11:4,7	./.:0:.,.	./.:0:.,.	1/1:12:12,0	1/1:15:15,0	1/0:11:6,5
MockRefGenome	116642	.	C	T	.	PASS	AC=23;AF=0.115;DP=891;AV=14.89;NS=45	GT:DP:AD	0/0:16:16,0	0/0:12:12,0	0/0:29:29,0	0/0:42:42,0	0/1:16:8,8	0/0:10:10,0	0/0:23:23,0	./.:0:.,.	0/1:31:16,15	./.:0:.,.	./.:0:.,.	0/1:16:9,7	./.:0:.,.	./.:0:.,.	1/1:12:0,12	./.:0:.,.	./.:0:.,.	./.:0:.,.	./.:0:.,.	0/0:10:10,0	0/1:7:3,4	0/1:14:9,5	0/1:17:14,3	0/1:16:8,8	0/0:15:15,0	1/1:18:0,18	0/1:16:7,9	0/0:26:26,0	0/1:12:4,8	0/1:18:10,8	0/0:17:17,0	0/1:15:9,6	./.:0:.,.	0/1:13:10,3	1/1:12:0,12	0/0:11:11,0	./.:0:.,.	./.:0:.,.	0/0:12:12,0	0/0:15:15,0	0/1:10:5,5
MockRefGenome	116645	.	G	C	.	PASS	AC=16;AF=0.080;DP=887;AV=14.98;NS=44	GT:DP:AD	0/0:16:16,0	0/0:12:12,0	0/0:29:29,0	0/0:42:42,0	0/0:16:16,0	0/0:10:10,0	0/0:23:23,0	./.:0:.,.	0/1:29:15,14	./.:0:.,.	./.:0:.,.	0/1:16:9,7	./.:0:.,.	./.:0:.,.	1/1:12:0,12	./.:0:.,.	./.:0:.,.	./.:0:.,.	./.:0:.,.	0/0:10:10,0	0/1:7:3,4	0/1:14:9,5	0/1:17:14,3	0/1:16:8,8	0/0:15:15,0	1/1:18:0,18	0/1:15:7,8	0/0:26:26,0	0/0:12:12,0	0/0:18:18,0	0/0:16:16,0	0/0:15:15,0	./.:0:.,.	0/1:13:10,3	0/0:12:12,0	0/0:11:11,0	./.:0:.,.	./.:0:.,.	0/0:12:12,0	0/0:15:15,0	0/1:10:5,5
MockRefGenome	116697	.	G	C	.	PASS	AC=9;AF=0.045;DP=900;AV=15.63;NS=43	GT:DP:AD	0/0:15:15,0	0/0:12:12,0	0/0:33:33,0	0/0:41:41,0	0/0:17:17,0	0/0:11:11,0	0/0:24:24,0	./.:0:.,.	0/0:31:31,0	./.:0:.,.	./.:0:.,.	0/0:18:18,0	./.:0:.,.	./.:0:.,.	0/0:16:16,0	./.:0:.,.	./.:0:.,.	./.:0:.,.	./.:0:.,.	0/0:11:11,0	./.:0:.,.	0/0:13:13,0	0/0:15:15,0	0/0:14:14,0	0/0:15:15,0	0/0:17:17,0	0/0:18:18,0	0/0:25:25,0	0/0:10:10,0	0/0:19:19,0	0/0:16:16,0	0/0:18:18,0	0/0:12:12,0	0/0:11:11,0	0/0:11:11,0	0/0:12:12,0	./.:0:.,.	./.:0:.,.	0/1:12:7,5	0/1:15:6,9	0/1:10:5,5
MockRefGenome	116703	.	G	C	.	PASS	AC=47;AF=0.235;DP=906;AV=15.67;NS=43	GT:DP:AD	1/1:15:15,0	1/1:12:12,0	0/0:34:0,34	1/1:42:42,0	0/0:17:0,17	0/0:11:0,11	1/1:24:24,0	./.:0:.,.	1/0:31:17,14	./.:0:.,.	./.:0:.,.	1/0:18:11,7	./.:0:.,.	./.:0:.,.	0/0:16:0,16	./.:0:.,.	./.:0:.,.	./.:0:.,.	./.:0:.,.	0/0:11:0,11	./.:0:.,.	0/0:13:0,13	0/0:15:0,15	1/0:15:7,8	1/1:17:17,0	0/0:17:0,17	1/0:18:8,10	1/1:25:25,0	./.:0:.,.	0/0:19:0,19	1/0:16:10,6	0/0:18:0,18	0/0:12:0,12	1/0:11:5,6	0/0:11:0,11	1/0:12:7,5	./.:0:.,.	./.:0:.,.	1/1:12:12,0	1/1:15:15,0	1/0:10:5,5
MockRefGenome	116727	.	G	A	.	PASS	AC=15;AF=0.075;DP=931;AV=15.39;NS=46	GT:DP:AD	0/0:16:16,0	0/0:12:12,0	1/1:34:0,34	0/0:42:42,0	0/0:18:18,0	0/0:11:11,0	0/0:25:25,0	./.:0:.,.	0/0:31:31,0	./.:0:.,.	./.:0:.,.	0/0:19:19,0	./.:0:.,.	./.:0:.,.	0/1:16:6,10	./.:0:.,.	./.:0:.,.	./.:0:.,.	./.:0:.,.	0/0:11:11,0	0/1:8:3,5	0/1:13:6,7	0/1:16:10,6	0/0:15:15,0	0/0:18:18,0	0/0:18:18,0	0/0:18:18,0	0/0:26:26,0	0/0:11:11,0	0/0:19:19,0	0/1:16:10,6	0/0:19:19,0	./.:0:.,.	./.:0:.,.	1/1:11:0,11	0/0:12:12,0	./.:0:.,.	./.:0:.,.	0/0:12:12,0	0/0:15:15,0	0/0:10:10,0
MockRefGenome	116814	.	G	C	.	PASS	AC=13;AF=0.065;DP=988;AV=16.28;NS=47	GT:DP:AD	0/0:16:16,0	0/0:13:13,0	0/0:34:34,0	0/0:43:43,0	1/1:18:0,18	0/0:11:11,0	0/0:26:26,0	./.:0:.,.	0/0:32:32,0	./.:0:.,.	./.:0:.,.	0/0:19:19,0	./.:0:.,.	./.:0:.,.	0/0:17:17,0	./.:0:.,.	./.:0:.,.	./.:0:.,.	./.:0:.,.	0/0:12:12,0	./.:0:.,.	0/0:15:15,0	0/0:18:18,0	0/0:16:16,0	0/0:19:19,0	0/0:18:18,0	0/0:18:18,0	0/0:30:30,0	1/1:12:0,12	1/1:19:0,19	0/0:17:17,0	1/1:19:0,19	0/1:12:9,3	0/0:14:14,0	1/1:13:0,13	1/1:12:0,12	./.:0:.,.	./.:0:.,.	0/0:13:13,0	0/0:15:15,0	0/0:11:11,0
MockRefGenome	116913	.	T	G	.	PASS	AC=4;AF=0.020;DP=710;AV=15.92;NS=24	GT:DP:AD	0/1:9:6,3	./.:0:.,.	0/0:17:17,0	0/1:41:32,9	./.:0:.,.	0/0:13:13,0	0/0:14:14,0	./.:0:.,.	0/0:29:29,0	0/1:15:8,7	./.:0:.,.	0/0:21:21,0	./.:0:.,.	./.:0:.,.	0/0:12:12,0	./.:0:.,.	./.:0:.,.	./.:0:.,.	0/0:12:12,0	0/0:14:14,0	0/0:12:12,0	0/0:11:11,0	0/0:16:16,0	./.:0:.,.	0/0:10:10,0	0/0:18:18,0	./.:0:.,.	0/0:12:12,0	0/0:10:10,0	0/0:15:15,0	0/0:13:13,0	./.:0:.,.	./.:0:.,.	0/0:20:20,0	./.:0:.,.	./.:0:.,.	./.:0:.,.	./.:0:.,.	./.:0:.,.	./.:0:.,.	./.:0:.,.
MockRefGenome	117513	.	G	A	.	PASS	AC=33;AF=0.165;DP=1361;AV=16.91;NS=67	GT:DP:AD	0/1:20:11,9	0/0:26:26,0	0/0:30:30,0	0/1:70:45,25	0/0:11:11,0	0/0:14:14,0	0/0:13:13,0	./.:0:.,.	0/0:31:31,0	./.:0:.,.	0/0:14:14,0	0/0:10:10,0	0/0:16:16,0	0/0:18:18,0	./.:0:.,.	./.:0:.,.	0/0:11:11,0	0/0:13:13,0	./.:0:.,.	0/0:19:19,0	./.:0:.,.	./.:0:.,.	0/0:12:12,0	0/0:16:16,0	0/0:13:13,0	0/0:12:12,0	0/0:17:17,0	0/0:29:29,0	0/0:18:18,0	0/0:18:18,0	0/0:11:11,0	0/0:25:25,0	0/0:14:14,0	0/0:17:17,0	./.:0:.,.	0/0:18:18,0	0/0:10:10,0	0/1:10:5,5	0/1:15:10,5	0/1:15:6,9	0/1:10:6,4
MockRefGenome	117528	.	G	C	.	PASS	AC=48;AF=0.240;DP=1375;AV=16.72;NS=69	GT:DP:AD	0/1:20:9,11	0/1:26:18,8	0/0:30:30,0	0/1:71:25,46	0/0:11:11,0	1/1:14:0,14	0/0:13:13,0	./.:0:.,.	1/1:31:0,31	./.:0:.,.	./.:0:.,.	1/1:10:0,10	0/0:16:16,0	0/1:18:12,6	./.:0:.,.	./.:0:.,.	0/0:11:11,0	0/1:13:5,8	0/1:7:4,3	0/0:19:19,0	./.:0:.,.	./.:0:.,.	0/1:12:7,5	0/0:16:16,0	0/0:13:13,0	0/1:12:5,7	0/1:17:9,8	0/0:29:29,0	0/0:19:19,0	0/0:18:18,0	0/0:11:11,0	0/0:25:25,0	0/0:14:14,0	0/0:18:18,0	./.:0:.,.	0/0:18:18,0	0/0:10:10,0	0/1:10:6,4	0/1:15:10,5	./.:0:.,.	0/1:11:5,6
MockRefGenome	117558	.	A	G	.	PASS	AC=39;AF=0.195;DP=1368;AV=17.85;NS=60	GT:DP:AD	0/0:20:20,0	0/1:26:12,14	1/1:30:0,30	0/0:71:71,0	0/1:11:5,6	0/0:14:14,0	0/0:13:13,0	./.:0:.,.	0/0:31:31,0	./.:0:.,.	./.:0:.,.	0/0:10:10,0	0/1:16:5,11	0/1:18:6,12	./.:0:.,.	./.:0:.,.	0/1:10:6,4	0/1:13:8,5	0/1:7:3,4	0/1:19:12,7	./.:0:.,.	./.:0:.,.	0/0:12:12,0	1/1:16:0,16	1/1:13:0,13	0/1:12:7,5	0/1:17:8,9	0/1:28:6,22	1/1:18:0,18	0/1:18:11,7	1/1:11:0,11	1/1:25:0,25	./.:0:.,.	0/0:18:18,0	./.:0:.,.	0/1:18:9,9	0/1:10:5,5	./.:0:.,.	0/1:15:10,5	0/0:15:15,0	0/0:11:11,0
MockRefGenome	117570	.	T	C	.	PASS	AC=55;AF=0.275;DP=1357;AV=16.85;NS=66	GT:DP:AD	0/0:19:19,0	0/1:26:14,12	0/0:30:30,0	0/1:71:25,46	0/0:11:11,0	1/1:14:0,14	1/1:13:0,13	./.:0:.,.	0/1:31:16,15	./.:0:.,.	./.:0:.,.	1/1:10:0,10	0/1:16:11,5	0/1:18:12,6	./.:0:.,.	./.:0:.,.	0/1:10:4,6	0/1:13:5,8	0/1:7:4,3	0/1:19:7,12	./.:0:.,.	./.:0:.,.	1/1:12:0,12	0/0:16:16,0	0/0:13:13,0	0/1:11:4,7	0/1:17:9,8	0/1:27:21,6	0/0:16:16,0	0/0:18:18,0	0/0:11:11,0	0/0:25:25,0	./.:0:.,.	1/1:18:0,18	./.:0:.,.	0/0:18:18,0	0/1:10:5,5	0/1:10:6,4	0/1:15:10,5	0/1:15:9,6	0/1:11:5,6
MockRefGenome	120204	.	G	C	.	PASS	AC=11;AF=0.055;DP=986;AV=15.40;NS=47	GT:DP:AD	0/0:13:13,0	0/1:49:33,16	0/0:23:23,0	0/0:25:25,0	./.:0:.,.	0/0:10:10,0	0/0:18:18,0	0/0:11:11,0	0/0:43:43,0	0/1:10:7,3	0/0:15:15,0	0/0:22:22,0	0/1:11:6,5	0/1:16:12,4	0/0:17:17,0	0/0:12:12,0	0/1:13:9,4	0/1:13:8,5	./.:0:.,.	./.:0:.,.	./.:0:.,.	./.:0:.,.	0/0:13:13,0	0/0:14:14,0	0/0:11:11,0	0/0:18:18,0	0/0:17:17,0	0/0:25:25,0	./.:0:.,.	./.:0:.,.	0/0:10:10,0	./.:0:.,.	./.:0:.,.	0/0:12:12,0	./.:0:.,.	./.:0:.,.	0/1:9:6,3	./.:0:.,.	./.:0:.,.	0/0:12:12,0	0/0:12:12,0
MockRefGenome	120243	.	A	G	.	PASS	AC=6;AF=0.030;DP=963;AV=15.02;NS=47	GT:DP:AD	0/0:13:13,0	0/0:49:49,0	0/0:23:23,0	0/0:25:25,0	./.:0:.,.	0/1:9:3,6	0/0:18:18,0	0/0:11:11,0	0/0:42:42,0	./.:0:.,.	0/0:15:15,0	0/0:22:22,0	0/0:11:11,0	0/0:16:16,0	0/0:17:17,0	0/0:10:10,0	0/0:13:13,0	0/0:13:13,0	0/1:8:5,3	./.:0:.,.	./.:0:.,.	./.:0:.,.	0/0:12:12,0	0/0:13:13,0	0/1:11:5,6	0/0:18:18,0	0/0:16:16,0	0/0:25:25,0	./.:0:.,.	./.:0:.,.	0/0:10:10,0	./.:0:.,.	./.:0:.,.	0/0:10:10,0	./.:0:.,.	./.:0:.,.	./.:0:.,.	./.:0:.,.	0/1:8:5,3	0/0:12:12,0	0/0:12:12,0
MockRefGenome	120261	.	C	T	.	PASS	AC=13;AF=0.065;DP=953;AV=15.37;NS=43	GT:DP:AD	0/0:13:13,0	0/0:49:48,1	0/0:23:23,0	0/0:25:25,0	./.:0:.,.	./.:0:.,.	0/1:18:11,7	0/0:11:11,0	0/0:42:42,0	./.:0:.,.	0/0:15:15,0	0/1:22:14,8	0/0:11:11,0	0/0:16:16,0	0/1:15:4,11	0/0:10:10,0	0/0:13:13,0	0/0:13:13,0	./.:0:.,.	./.:0:.,.	./.:0:.,.	./.:0:.,.	./.:0:.,.	0/0:13:13,0	0/1:11:6,5	1/1:18:0,18	0/1:15:6,9	0/1:25:10,15	./.:0:.,.	./.:0:.,.	0/1:10:6,4	./.:0:.,.	./.:0:.,.	0/0:10:10,0	./.:0:.,.	./.:0:.,.	0/1:9:6,3	./.:0:.,.	./.:0:.,.	0/0:12:12,0	0/0:11:11,0
MockRefGenome	120297	.	T	C	.	PASS	AC=28;AF=0.140;DP=721;AV=14.92;NS=36	GT:DP:AD	0/0:12:12,0	1/1:48:0,48	1/1:23:0,23	0/0:25:25,0	./.:0:.,.	./.:0:.,.	0/1:18:7,11	./.:0:.,.	1/1:42:0,42	./.:0:.,.	./.:0:.,.	0/1:21:8,13	./.:0:.,.	./.:0:.,.	0/1:14:10,4	./.:0:.,.	0/1:13:5,8	0/1:13:6,7	./.:0:.,.	./.:0:.,.	./.:0:.,.	./.:0:.,.	./.:0:.,.	1/1:11:0,11	0/1:10:5,5	0/0:13:13,0	./.:0:.,.	0/1:24:14,10	./.:0:.,.	./.:0:.,.	0/1:10:4,6	./.:0:.,.	./.:0:.,.	0/1:10:3,7	./.:0:.,.	./.:0:.,.	./.:0:.,.	./.:0:.,.	0/1:8:5,3	0/0:10:10,0	0/1:9:6,3
MockRefGenome	120325	.	C	T	.	PASS	AC=19;AF=0.095;DP=878;AV=14.22;NS=40	GT:DP:AD	0/0:12:12,0	0/0:49:49,0	0/0:22:22,0	0/0:25:25,0	./.:0:.,.	0/1:10:6,4	0/1:18:7,11	0/1:10:7,3	0/1:41:28,13	./.:0:.,.	0/0:13:13,0	0/0:14:14,0	./.:0:.,.	0/0:16:16,0	0/0:15:15,0	0/0:11:11,0	./.:0:.,.	./.:0:.,.	./.:0:.,.	./.:0:.,.	./.:0:.,.	./.:0:.,.	./.:0:.,.	0/1:10:6,4	0/1:10:5,5	./.:0:.,.	0/1:14:9,5	0/1:22:14,8	./.:0:.,.	./.:0:.,.	0/0:10:10,0	./.:0:.,.	./.:0:.,.	1/1:11:0,11	./.:0:.,.	./.:0:.,.	./.:0:.,.	./.:0:.,.	0/1:8:5,3	0/0:10:10,0	0/0:10:10,0
MockRefGenome	120355	.	T	C	.	PASS	AC=28;AF=0.140;DP=917;AV=14.41;NS=46	GT:DP:AD	1/1:12:0,12	0/0:49:49,0	0/0:22:22,0	1/1:25:0,25	./.:0:.,.	0/0:10:10,0	0/0:18:18,0	0/0:10:10,0	0/0:41:41,0	./.:0:.,.	0/0:13:13,0	0/0:22:22,0	./.:0:.,.	0/0:16:16,0	0/0:16:16,0	0/0:11:11,0	0/0:12:12,0	0/0:12:12,0	./.:0:.,.	./.:0:.,.	./.:0:.,.	./.:0:.,.	0/0:11:11,0	0/0:10:10,0	0/0:11:11,0	0/0:14:14,0	0/0:14:14,0	0/0:22:22,0	./.:0:.,.	./.:0:.,.	0/0:10:10,0	./.:0:.,.	./.:0:.,.	0/1:11:8,3	./.:0:.,.	./.:0:.,.	./.:0:.,.	./.:0:.,.	0/1:8:3,5	0/1:11:7,4	0/1:10:4,6
MockRefGenome	120359	.	G	C	.	PASS	AC=31;AF=0.155;DP=920;AV=14.36;NS=47	GT:DP:AD	1/1:12:0,12	0/0:49:49,0	0/0:22:22,0	1/1:25:0,25	./.:0:.,.	0/0:10:10,0	0/0:18:18,0	0/0:10:10,0	0/0:41:41,0	./.:0:.,.	0/0:14:14,0	0/0:22:22,0	./.:0:.,.	0/0:15:15,0	0/0:16:16,0	0/0:12:12,0	0/0:12:12,0	0/0:12:12,0	./.:0:.,.	./.:0:.,.	./.:0:.,.	./.:0:.,.	0/0:11:11,0	0/0:10:10,0	0/0:11:11,0	0/0:14:14,0	0/0:14:14,0	0/0:22:22,0	./.:0:.,.	./.:0:.,.	0/0:10:10,0	./.:0:.,.	./.:0:.,.	1/1:11:0,11	./.:0:.,.	./.:0:.,.	./.:0:.,.	./.:0:.,.	0/1:8:3,5	0/1:11:7,4	0/1:10:4,6
MockRefGenome	120445	.	A	G	.	PASS	AC=11;AF=0.055;DP=986;AV=15.10;NS=49	GT:DP:AD	0/0:13:13,0	0/0:49:49,0	0/0:23:23,0	0/0:25:25,0	./.:0:.,.	0/1:10:6,4	0/1:18:7,11	0/0:11:11,0	0/1:43:29,14	0/0:10:10,0	0/0:15:15,0	0/0:23:23,0	0/0:11:11,0	0/0:16:16,0	0/0:17:17,0	0/0:12:12,0	0/0:14:14,0	0/0:13:13,0	./.:0:.,.	./.:0:.,.	./.:0:.,.	0/1:9:3,6	./.:0:.,.	0/1:12:7,5	0/1:11:5,6	0/0:18:18,0	0/0:17:17,0	0/1:25:15,10	./.:0:.,.	./.:0:.,.	0/0:10:10,0	./.:0:.,.	./.:0:.,.	0/0:12:12,0	./.:0:.,.	./.:0:.,.	0/0:10:10,0	./.:0:.,.	0/1:8:5,3	0/0:11:11,0	0/0:11:11,0
MockRefGenome	120448	.	G	A	.	PASS	AC=12;AF=0.060;DP=986;AV=15.10;NS=49	GT:DP:AD	0/0:13:13,0	0/0:49:49,0	0/0:23:23,0	0/0:25:25,0	./.:0:.,.	0/1:10:6,4	0/1:18:7,11	0/0:11:11,0	0/1:43:29,14	0/0:10:10,0	0/0:15:15,0	0/0:23:23,0	0/0:11:11,0	0/0:16:16,0	0/0:17:17,0	0/0:12:12,0	0/0:14:14,0	0/0:13:13,0	./.:0:.,.	./.:0:.,.	./.:0:.,.	0/1:9:3,6	./.:0:.,.	0/1:12:7,5	0/1:11:5,6	0/1:18:10,8	0/0:17:17,0	0/1:25:15,10	./.:0:.,.	./.:0:.,.	0/0:10:10,0	./.:0:.,.	./.:0:.,.	0/0:12:12,0	./.:0:.,.	./.:0:.,.	0/0:10:10,0	./.:0:.,.	0/1:8:5,3	0/0:11:11,0	0/0:11:11,0
MockRefGenome	120534	.	G	T	.	PASS	AC=35;AF=0.175;DP=1304;AV=15.92;NS=65	GT:DP:AD	0/0:23:23,0	1/1:51:0,51	0/0:23:23,0	./.:0:.,.	0/0:14:14,0	0/0:14:14,0	0/0:21:21,0	0/1:16:3,13	0/0:38:38,0	1/1:12:0,12	0/1:14:6,8	0/0:18:18,0	1/1:10:0,10	1/1:12:0,12	0/0:18:18,0	0/1:13:4,9	0/1:24:4,20	0/1:17:12,5	./.:0:.,.	./.:0:.,.	0/0:11:11,0	0/0:13:13,0	0/0:12:12,0	./.:0:.,.	0/0:16:16,0	0/0:21:21,0	0/0:17:17,0	0/0:15:15,0	0/0:23:23,0	0/0:15:15,0	0/0:13:13,0	./.:0:.,.	0/1:20:8,12	0/0:34:34,0	0/0:13:13,0	./.:0:.,.	./.:0:.,.	0/0:16:16,0	0/0:16:16,0	0/0:17:17,0	0/0:15:15,0
MockRefGenome	120561	.	C	G	.	PASS	AC=20;AF=0.100;DP=1287;AV=15.66;NS=64	GT:DP:AD	0/1:23:9,14	0/0:50:50,0	0/0:23:23,0	./.:0:.,.	0/0:14:14,0	0/0:14:14,0	0/0:21:21,0	0/0:16:16,0	0/0:38:38,0	0/0:12:12,0	0/0:14:14,0	0/0:17:17,0	0/0:10:10,0	0/0:12:12,0	0/0:18:18,0	0/0:13:13,0	0/0:24:24,0	0/0:16:16,0	0/1:7:4,3	./.:0:.,.	0/0:11:11,0	0/0:13:13,0	0/0:12:12,0	./.:0:.,.	0/0:16:16,0	0/0:21:21,0	0/0:17:17,0	0/0:14:14,0	0/0:23:23,0	0/0:15:15,0	0/0:12:12,0	./.:0:.,.	0/0:20:20,0	0/0:34:34,0	0/0:13:13,0	./.:0:.,.	0/0:10:10,0	0/1:16:9,7	0/1:16:9,7	0/0:15:15,0	0/1:14:9,5
MockRefGenome	120564	.	C	T	.	PASS	AC=20;AF=0.100;DP=1287;AV=15.69;NS=64	GT:DP:AD	0/1:23:9,14	0/0:50:50,0	0/0:23:23,0	./.:0:.,.	0/0:14:14,0	0/0:14:14,0	0/0:21:21,0	0/0:16:16,0	0/0:38:38,0	0/0:12:12,0	0/0:14:14,0	0/0:17:17,0	0/0:10:10,0	0/0:12:12,0	0/0:18:18,0	0/0:12:12,0	0/0:24:24,0	0/0:16:16,0	./.:0:.,.	./.:0:.,.	0/0:11:11,0	0/0:13:13,0	0/0:12:12,0	./.:0:.,.	0/0:16:16,0	0/0:21:21,0	0/0:17:17,0	0/0:14:14,0	0/0:23:23,0	0/0:15:15,0	0/0:12:12,0	./.:0:.,.	0/0:20:20,0	0/0:34:34,0	0/0:13:13,0	./.:0:.,.	0/0:10:10,0	0/1:16:9,7	0/1:16:9,7	0/0:15:15,0	0/1:15:10,5
MockRefGenome	120591	.	C	G	.	PASS	AC=16;AF=0.080;DP=1247;AV=15.49;NS=63	GT:DP:AD	0/1:22:8,14	0/0:50:50,0	0/0:23:23,0	./.:0:.,.	0/0:14:14,0	0/0:14:14,0	0/0:20:20,0	0/0:15:15,0	0/0:38:38,0	0/0:12:12,0	0/0:13:13,0	0/0:17:17,0	0/0:10:10,0	0/0:12:12,0	0/0:17:17,0	0/0:11:11,0	0/0:21:21,0	0/0:16:16,0	./.:0:.,.	./.:0:.,.	0/0:11:11,0	0/0:13:13,0	0/0:12:12,0	./.:0:.,.	0/0:16:16,0	0/0:21:21,0	0/0:17:17,0	0/0:14:14,0	0/0:20:20,0	0/0:15:15,0	0/0:12:12,0	./.:0:.,.	0/0:19:19,0	0/0:34:34,0	0/0:13:13,0	./.:0:.,.	0/0:10:10,0	0/1:16:9,7	0/1:15:9,6	0/0:14:14,0	0/1:15:10,5
MockRefGenome	120613	.	G	A	.	PASS	AC=16;AF=0.080;DP=1235;AV=15.81;NS=62	GT:DP:AD	0/1:22:8,14	0/0:48:48,0	0/0:23:23,0	0/0:32:31,1	0/0:14:14,0	0/0:14:14,0	0/0:20:20,0	0/0:15:15,0	0/0:38:38,0	0/0:12:12,0	0/0:13:13,0	0/0:17:17,0	0/0:10:10,0	0/0:11:11,0	0/0:17:17,0	0/0:11:11,0	0/0:20:20,0	0/0:16:16,0	./.:0:.,.	./.:0:.,.	0/0:11:11,0	0/0:13:13,0	0/0:12:12,0	./.:0:.,.	0/0:15:15,0	0/0:21:21,0	0/0:17:17,0	0/0:14:14,0	0/0:20:20,0	0/0:15:15,0	0/0:12:12,0	./.:0:.,.	0/0:19:19,0	0/0:34:34,0	0/0:13:13,0	./.:0:.,.	./.:0:.,.	0/1:16:9,7	0/1:15:9,6	0/0:14:14,0	0/1:14:9,5
MockRefGenome	120659	.	G	T	.	PASS	AC=29;AF=0.145;DP=1328;AV=17.29;NS=63	GT:DP:AD	0/1:21:8,13	0/0:50:50,0	0/0:23:23,0	0/1:59:29,30	0/0:14:14,0	0/0:13:13,0	0/0:20:20,0	0/0:14:14,0	0/0:35:35,0	0/0:12:12,0	0/0:11:11,0	0/0:17:17,0	./.:0:.,.	0/0:11:11,0	0/0:16:16,0	0/0:13:13,0	0/0:20:20,0	0/0:16:16,0	./.:0:.,.	./.:0:.,.	0/0:10:10,0	0/0:13:13,0	0/0:11:11,0	./.:0:.,.	0/0:13:13,0	0/0:21:21,0	0/0:18:18,0	0/0:12:12,0	0/0:23:23,0	0/0:15:15,0	0/0:11:11,0	./.:0:.,.	0/0:19:19,0	0/0:34:34,0	0/0:13:13,0	./.:0:.,.	0/0:11:11,0	0/1:14:9,5	0/1:16:9,7	0/1:25:16,9	0/1:13:9,4
MockRefGenome	120704	.	C	T	.	PASS	AC=30;AF=0.150;DP=1394;AV=17.46;NS=67	GT:DP:AD	0/1:22:9,13	0/0:50:50,0	0/0:23:23,0	0/1:62:31,31	0/0:14:14,0	0/0:13:13,0	0/0:21:21,0	0/0:16:16,0	0/0:38:38,0	0/0:12:12,0	0/0:13:13,0	0/0:19:19,0	./.:0:.,.	0/0:11:11,0	0/0:18:18,0	./.:0:.,.	0/0:22:22,0	0/0:17:17,0	./.:0:.,.	0/0:10:10,0	0/0:11:11,0	0/0:13:13,0	0/0:11:11,0	./.:0:.,.	0/0:15:15,0	0/0:21:21,0	0/0:18:18,0	0/0:13:13,0	0/0:23:23,0	0/0:15:15,0	0/0:12:12,0	./.:0:.,.	0/0:20:20,0	0/0:34:34,0	0/0:13:13,0	./.:0:.,.	0/0:11:11,0	0/1:14:9,5	0/1:16:9,7	0/1:27:17,10	0/1:15:10,5
MockRefGenome	120707	.	G	A	.	PASS	AC=30;AF=0.150;DP=1398;AV=17.30;NS=70	GT:DP:AD	0/0:22:22,0	0/1:51:21,30	0/0:23:23,0	0/1:62:31,31	0/0:14:14,0	0/0:13:13,0	0/0:21:21,0	0/0:16:16,0	0/0:38:38,0	./.:0:.,.	1/1:13:0,13	0/0:19:19,0	0/1:9:3,6	0/1:11:5,6	0/0:18:18,0	0/1:14:5,9	1/1:22:0,22	0/1:17:3,14	./.:0:.,.	0/0:10:10,0	0/0:11:11,0	0/0:13:13,0	0/0:11:11,0	./.:0:.,.	0/0:15:15,0	0/0:21:21,0	0/0:18:18,0	0/0:13:13,0	0/0:23:23,0	0/0:15:15,0	0/0:12:12,0	./.:0:.,.	0/0:20:20,0	0/0:34:34,0	0/0:13:13,0	./.:0:.,.	1/1:11:0,11	0/0:14:14,0	0/0:16:16,0	0/0:27:27,0	0/0:15:15,0
MockRefGenome	120716	.	C	T	.	PASS	AC=10;AF=0.050;DP=1408;AV=17.59;NS=69	GT:DP:AD	0/0:23:23,0	0/0:51:51,0	0/0:23:23,0	0/0:62:62,0	0/0:14:14,0	0/1:13:5,8	0/0:21:21,0	0/0:16:16,0	0/1:38:18,20	0/0:12:12,0	0/0:13:13,0	0/0:19:19,0	0/0:10:10,0	0/0:12:12,0	0/0:18:18,0	0/0:14:14,0	0/0:24:24,0	0/0:17:17,0	0/1:7:3,4	./.:0:.,.	0/0:11:11,0	./.:0:.,.	0/1:11:7,4	./.:0:.,.	0/0:16:16,0	0/0:21:21,0	0/1:18:7,11	0/0:14:14,0	0/0:23:23,0	0/0:15:15,0	0/0:12:12,0	./.:0:.,.	0/0:20:20,0	0/0:34:34,0	0/0:13:13,0	./.:0:.,.	0/0:11:11,0	0/0:14:14,0	0/0:16:16,0	0/1:27:19,8	0/0:15:15,0
MockRefGenome	120734	.	C	T	.	PASS	AC=30;AF=0.150;DP=1430;AV=17.59;NS=70	GT:DP:AD	0/1:23:9,14	0/0:51:51,0	0/0:23:23,0	0/1:64:33,31	0/0:14:14,0	0/0:14:14,0	0/0:21:21,0	0/0:16:16,0	0/0:38:38,0	0/0:12:12,0	0/0:14:14,0	0/0:19:19,0	0/0:10:10,0	0/0:12:12,0	0/0:18:18,0	0/0:14:14,0	0/0:24:24,0	0/0:17:17,0	./.:0:.,.	0/0:10:10,0	0/0:11:11,0	0/0:13:13,0	0/0:12:12,0	./.:0:.,.	0/0:16:16,0	0/0:21:21,0	0/0:18:18,0	0/0:15:15,0	0/0:23:23,0	0/0:15:15,0	0/0:13:13,0	./.:0:.,.	0/0:20:20,0	0/0:34:34,0	0/0:13:13,0	./.:0:.,.	0/0:12:12,0	0/1:15:9,6	0/1:16:9,7	0/1:27:17,10	0/1:15:10,5
MockRefGenome	120735	.	G	A	.	PASS	AC=30;AF=0.150;DP=1430;AV=17.59;NS=70	GT:DP:AD	0/1:23:9,14	0/0:51:51,0	0/0:23:23,0	0/1:64:33,31	0/0:14:14,0	0/0:14:14,0	0/0:21:21,0	0/0:16:16,0	0/0:38:38,0	0/0:12:12,0	0/0:14:14,0	0/0:19:19,0	0/0:10:10,0	0/0:12:12,0	0/0:18:18,0	0/0:14:14,0	0/0:24:24,0	0/0:17:17,0	./.:0:.,.	0/0:10:10,0	0/0:11:11,0	0/0:13:13,0	0/0:12:12,0	./.:0:.,.	0/0:16:16,0	0/0:21:21,0	0/0:18:18,0	0/0:15:15,0	0/0:23:23,0	0/0:15:15,0	0/0:13:13,0	./.:0:.,.	0/0:20:20,0	0/0:34:34,0	0/0:13:13,0	./.:0:.,.	0/0:12:12,0	0/1:15:9,6	0/1:16:9,7	0/1:27:17,10	0/1:15:10,5
MockRefGenome	120785	.	G	T	.	PASS	AC=12;AF=0.060;DP=1430;AV=17.76;NS=70	GT:DP:AD	0/0:23:23,0	0/1:51:20,31	0/0:23:23,0	0/0:64:64,0	0/0:14:14,0	0/0:14:14,0	0/0:21:21,0	0/1:16:13,3	0/0:38:38,0	0/1:12:7,5	0/1:14:9,5	0/0:19:19,0	0/1:10:6,4	0/1:12:6,6	0/0:18:18,0	0/1:14:9,5	0/1:24:20,4	0/0:17:17,0	./.:0:.,.	0/0:10:10,0	0/0:11:11,0	0/0:13:13,0	0/0:12:12,0	./.:0:.,.	0/0:16:16,0	0/0:21:21,0	0/0:18:18,0	0/0:15:15,0	0/0:23:23,0	0/0:15:15,0	0/0:13:13,0	./.:0:.,.	0/1:20:8,12	0/0:34:34,0	0/0:13:13,0	./.:0:.,.	0/0:12:12,0	0/0:15:15,0	0/0:16:16,0	0/0:27:27,0	0/0:15:15,0
MockRefGenome	121902	.	G	A	.	PASS	AC=11;AF=0.055;DP=1236;AV=19.49;NS=51	GT:DP:AD	0/0:34:34,0	0/0:96:96,0	0/0:21:21,0	0/0:44:44,0	0/0:13:13,0	./.:0:.,.	0/0:23:23,0	./.:0:.,.	0/0:73:73,0	./.:0:.,.	0/1:19:9,10	0/0:23:23,0	0/0:13:13,0	0/1:11:8,3	0/0:26:26,0	0/1:12:7,5	0/1:24:16,8	0/1:19:12,7	./.:0:.,.	./.:0:.,.	0/0:17:17,0	0/0:10:10,0	0/0:20:20,0	./.:0:.,.	./.:0:.,.	./.:0:.,.	./.:0:.,.	0/0:27:27,0	0/0:10:10,0	0/0:12:12,0	./.:0:.,.	0/1:25:11,14	./.:0:.,.	0/0:19:19,0	0/1:16:5,11	0/0:14:14,0	./.:0:.,.	./.:0:.,.	0/0:12:12,0	0/0:10:10,0	./.:0:.,.
MockRefGenome	121905	.	G	A	.	PASS	AC=61;AF=0.305;DP=1232;AV=18.98;NS=53	GT:DP:AD	1/1:34:34,0	1/1:95:95,0	0/0:21:0,21	1/1:43:43,0	1/0:13:9,4	./.:0:.,.	0/0:23:0,23	./.:0:.,.	0/0:73:0,73	./.:0:.,.	1/0:19:9,10	0/0:23:0,23	1/1:13:13,0	1/0:11:8,3	0/0:26:0,26	1/0:12:7,5	1/0:24:16,8	1/0:19:11,8	./.:0:.,.	./.:0:.,.	0/0:17:0,17	0/0:10:0,10	0/0:20:0,20	./.:0:.,.	./.:0:.,.	./.:0:.,.	./.:0:.,.	0/0:27:0,27	1/1:10:10,0	0/0:12:0,12	./.:0:.,.	1/0:25:11,14	1/0:9:6,3	1/0:19:15,4	0/0:16:0,16	1/1:13:13,0	1/0:11:8,3	./.:0:.,.	./.:0:.,.	1/1:10:10,0	./.:0:.,.
MockRefGenome	121920	.	C	T	.	PASS	AC=15;AF=0.075;DP=1219;AV=19.25;NS=51	GT:DP:AD	0/0:34:34,0	0/0:95:95,0	0/0:20:20,0	0/0:43:43,0	0/1:13:9,4	./.:0:.,.	0/1:23:11,12	./.:0:.,.	0/1:73:37,36	./.:0:.,.	0/0:19:19,0	0/1:21:14,7	0/0:13:13,0	0/0:10:10,0	0/0:25:25,0	0/0:12:12,0	0/0:24:24,0	0/0:19:19,0	./.:0:.,.	./.:0:.,.	0/1:17:11,6	0/1:10:3,7	0/1:20:13,7	./.:0:.,.	./.:0:.,.	./.:0:.,.	./.:0:.,.	0/0:27:27,0	0/0:10:10,0	1/1:12:0,12	./.:0:.,.	0/0:24:24,0	./.:0:.,.	0/0:19:19,0	0/1:16:11,5	0/0:13:13,0	0/0:11:11,0	./.:0:.,.	0/0:11:11,0	0/0:10:10,0	./.:0:.,.
MockRefGenome	122001	.	C	T	.	PASS	AC=13;AF=0.065;DP=1212;AV=19.08;NS=51	GT:DP:AD	0/0:35:35,0	0/0:95:95,0	0/0:20:20,0	0/0:43:43,0	0/0:12:12,0	./.:0:.,.	0/1:22:12,10	./.:0:.,.	0/1:72:37,35	./.:0:.,.	0/0:20:20,0	0/0:22:22,0	0/0:12:12,0	0/0:11:11,0	1/1:25:0,25	0/0:13:13,0	0/0:24:24,0	0/0:16:16,0	./.:0:.,.	./.:0:.,.	0/1:16:7,9	0/1:10:7,3	0/1:21:7,14	./.:0:.,.	./.:0:.,.	./.:0:.,.	./.:0:.,.	0/1:29:17,12	./.:0:.,.	0/0:11:11,0	./.:0:.,.	0/0:23:23,0	./.:0:.,.	0/0:17:17,0	0/0:18:18,0	1/1:12:0,12	0/0:10:10,0	./.:0:.,.	0/0:12:12,0	0/0:10:10,0	./.:0:.,.
MockRefGenome	122002	.	G	A	.	PASS	AC=9;AF=0.045;DP=1212;AV=18.96;NS=51	GT:DP:AD	0/0:35:35,0	0/1:95:15,80	0/0:20:20,0	0/0:43:43,0	0/0:12:12,0	./.:0:.,.	0/0:22:22,0	0/1:8:4,4	0/0:72:72,0	./.:0:.,.	0/0:20:20,0	0/0:22:22,0	0/1:12:5,7	0/0:11:11,0	0/0:25:25,0	0/1:13:9,4	0/1:24:20,4	0/1:16:7,9	./.:0:.,.	./.:0:.,.	0/0:16:16,0	0/0:10:10,0	0/0:21:21,0	./.:0:.,.	./.:0:.,.	./.:0:.,.	./.:0:.,.	0/0:29:29,0	0/0:10:10,0	0/0:11:11,0	./.:0:.,.	0/0:23:23,0	./.:0:.,.	0/0:17:17,0	0/0:18:18,0	0/0:12:12,0	0/1:10:3,7	./.:0:.,.	0/0:12:12,0	0/0:10:10,0	./.:0:.,.
MockRefGenome	122109	.	G	T	.	PASS	AC=28;AF=0.140;DP=1280;AV=20.18;NS=50	GT:DP:AD	0/1:36:25,11	1/1:100:0,100	0/0:21:21,0	0/0:45:45,0	0/1:13:9,4	./.:0:.,.	0/0:23:23,0	./.:0:.,.	0/0:76:75,1	./.:0:.,.	1/1:20:0,20	0/0:25:25,0	1/1:13:0,13	1/1:11:0,11	0/0:26:26,0	1/1:13:0,13	0/1:25:10,15	./.:0:.,.	./.:0:.,.	./.:0:.,.	0/0:18:18,0	0/0:10:10,0	0/0:21:21,0	./.:0:.,.	./.:0:.,.	./.:0:.,.	./.:0:.,.	0/0:30:30,0	0/0:10:10,0	1/1:12:0,12	./.:0:.,.	0/0:26:26,0	./.:0:.,.	0/1:19:15,4	0/1:18:12,6	0/0:14:14,0	1/1:11:0,11	./.:0:.,.	0/0:12:12,0	0/0:10:10,0	./.:0:.,.
MockRefGenome	122112	.	G	T	.	PASS	AC=29;AF=0.145;DP=1279;AV=20.24;NS=50	GT:DP:AD	0/1:36:11,25	0/0:100:100,0	0/0:21:21,0	1/1:45:0,45	0/0:13:13,0	./.:0:.,.	0/0:23:23,0	./.:0:.,.	0/0:76:76,0	./.:0:.,.	0/0:20:20,0	0/0:25:25,0	0/0:13:13,0	0/0:11:11,0	0/0:26:26,0	0/0:13:13,0	0/1:25:15,10	0/0:19:19,0	./.:0:.,.	./.:0:.,.	0/0:18:18,0	0/0:10:10,0	0/0:21:21,0	./.:0:.,.	./.:0:.,.	./.:0:.,.	./.:0:.,.	0/0:30:30,0	0/0:10:10,0	0/0:12:12,0	./.:0:.,.	0/0:26:26,0	./.:0:.,.	0/0:19:19,0	0/0:18:18,0	0/0:14:14,0	0/0:11:11,0	./.:0:.,.	./.:0:.,.	1/1:10:0,10	./.:0:.,.
MockRefGenome	123872	.	G	C	.	PASS	AC=12;AF=0.060;DP=825;AV=13.32;NS=37	GT:DP:AD	./.:0:.,.	0/0:25:25,0	0/0:16:16,0	0/0:23:23,0	0/0:18:18,0	0/1:10:5,5	0/1:10:4,6	./.:0:.,.	0/0:25:25,0	0/0:15:15,0	0/0:15:15,0	0/0:11:11,0	0/0:16:16,0	0/0:15:15,0	0/1:14:3,11	./.:0:.,.	./.:0:.,.	./.:0:.,.	./.:0:.,.	0/0:10:10,0	./.:0:.,.	./.:0:.,.	0/0:14:14,0	./.:0:.,.	0/0:12:12,0	./.:0:.,.	0/1:12:8,4	0/0:17:17,0	./.:0:.,.	0/0:10:10,0	0/1:26:12,14	./.:0:.,.	0/0:10:10,0	0/0:14:14,0	0/0:13:13,0	0/0:10:10,0	./.:0:.,.	0/1:9:5,4	0/1:11:8,3	0/0:13:13,0	./.:0:.,.
MockRefGenome	124057	.	T	C	.	PASS	AC=5;AF=0.025;DP=788;AV=13.55;NS=29	GT:DP:AD	./.:0:.,.	0/0:17:17,0	0/0:16:16,0	0/0:23:23,0	0/0:18:18,0	0/1:10:5,5	0/0:10:10,0	./.:0:.,.	0/0:25:25,0	0/0:14:14,0	./.:0:.,.	0/0:11:11,0	0/0:15:15,0	0/0:15:15,0	0/1:14:3,11	./.:0:.,.	./.:0:.,.	./.:0:.,.	./.:0:.,.	./.:0:.,.	./.:0:.,.	./.:0:.,.	0/0:14:14,0	./.:0:.,.	0/0:12:12,0	./.:0:.,.	0/0:11:11,0	0/0:16:16,0	./.:0:.,.	0/0:11:11,0	0/0:24:24,0	./.:0:.,.	./.:0:.,.	0/1:14:9,5	0/0:12:12,0	./.:0:.,.	./.:0:.,.	./.:0:.,.	0/0:10:10,0	0/0:12:12,0	./.:0:.,.
MockRefGenome	125143	.	G	A	.	PASS	AC=27;AF=0.135;DP=951;AV=15.76;NS=42	GT:DP:AD	./.:0:.,.	0/0:10:10,0	./.:0:.,.	1/1:29:1,28	0/0:13:13,0	./.:0:.,.	./.:0:.,.	./.:0:.,.	0/0:47:47,0	0/1:7:3,4	./.:0:.,.	0/0:22:22,0	./.:0:.,.	./.:0:.,.	0/0:17:17,0	./.:0:.,.	0/0:10:10,0	./.:0:.,.	./.:0:.,.	./.:0:.,.	./.:0:.,.	./.:0:.,.	0/0:13:13,0	./.:0:.,.	./.:0:.,.	0/0:13:13,0	0/0:10:10,0	0/0:22:22,0	0/0:16:16,0	0/0:14:14,0	./.:0:.,.	./.:0:.,.	./.:0:.,.	./.:0:.,.	0/0:22:22,0	0/0:21:21,0	./.:0:.,.	./.:0:.,.	0/1:8:4,4	0/1:17:11,6	0/1:12:8,4
MockRefGenome	125146	.	C	G	.	PASS	AC=11;AF=0.055;DP=971;AV=16.14;NS=42	GT:DP:AD	0/0:11:11,0	0/0:11:11,0	./.:0:.,.	0/0:29:29,0	0/0:13:13,0	./.:0:.,.	./.:0:.,.	./.:0:.,.	0/0:47:47,0	./.:0:.,.	./.:0:.,.	0/0:22:22,0	./.:0:.,.	./.:0:.,.	0/0:17:17,0	./.:0:.,.	0/0:10:10,0	./.:0:.,.	./.:0:.,.	./.:0:.,.	./.:0:.,.	./.:0:.,.	0/0:13:13,0	./.:0:.,.	./.:0:.,.	0/0:13:13,0	0/0:10:10,0	0/0:22:22,0	0/0:16:16,0	0/0:14:14,0	./.:0:.,.	./.:0:.,.	./.:0:.,.	0/0:12:12,0	0/0:22:22,0	0/0:21:21,0	./.:0:.,.	./.:0:.,.	./.:0:.,.	0/1:17:14,3	0/1:12:4,8
MockRefGenome	125176	.	A	G	.	PASS	AC=24;AF=0.120;DP=967;AV=16.33;NS=39	GT:DP:AD	0/0:11:11,0	./.:0:.,.	./.:0:.,.	0/0:29:28,1	0/1:13:6,7	./.:0:.,.	./.:0:.,.	./.:0:.,.	1/1:47:0,47	./.:0:.,.	./.:0:.,.	0/0:21:21,0	./.:0:.,.	./.:0:.,.	0/1:17:9,8	./.:0:.,.	0/0:10:10,0	./.:0:.,.	./.:0:.,.	./.:0:.,.	./.:0:.,.	./.:0:.,.	0/1:13:3,10	./.:0:.,.	./.:0:.,.	1/1:13:0,13	0/1:10:4,6	1/1:22:0,22	0/1:16:6,10	0/0:14:14,0	./.:0:.,.	./.:0:.,.	./.:0:.,.	./.:0:.,.	0/0:22:22,0	0/1:21:4,17	./.:0:.,.	./.:0:.,.	./.:0:.,.	0/0:17:17,0	0/0:12:12,0
MockRefGenome	125236	.	C	A	.	PASS	AC=30;AF=0.150;DP=933;AV=15.19;NS=42	GT:DP:AD	./.:0:.,.	0/0:11:11,0	./.:0:.,.	1/1:28:1,27	0/0:12:12,0	./.:0:.,.	./.:0:.,.	./.:0:.,.	0/0:46:46,0	./.:0:.,.	./.:0:.,.	0/0:20:20,0	./.:0:.,.	./.:0:.,.	0/0:17:17,0	./.:0:.,.	0/0:10:10,0	./.:0:.,.	./.:0:.,.	./.:0:.,.	./.:0:.,.	./.:0:.,.	0/0:11:11,0	./.:0:.,.	./.:0:.,.	0/0:12:12,0	0/0:10:10,0	0/0:21:21,0	0/0:16:16,0	0/0:12:12,0	./.:0:.,.	./.:0:.,.	./.:0:.,.	0/0:12:12,0	0/0:20:20,0	0/0:21:21,0	./.:0:.,.	./.:0:.,.	0/1:8:4,4	0/1:17:11,6	0/1:12:8,4
MockRefGenome	125309	.	G	C	.	PASS	AC=28;AF=0.140;DP=891;AV=15.71;NS=35	GT:DP:AD	./.:0:.,.	0/0:17:17,0	./.:0:.,.	1/1:28:1,27	0/0:11:11,0	./.:0:.,.	./.:0:.,.	./.:0:.,.	0/0:46:46,0	./.:0:.,.	./.:0:.,.	1/1:20:0,20	./.:0:.,.	./.:0:.,.	0/0:15:15,0	./.:0:.,.	0/0:10:10,0	./.:0:.,.	./.:0:.,.	./.:0:.,.	./.:0:.,.	./.:0:.,.	0/0:13:13,0	./.:0:.,.	./.:0:.,.	0/1:12:6,6	./.:0:.,.	1/1:17:0,17	0/0:14:14,0	0/0:12:12,0	./.:0:.,.	./.:0:.,.	./.:0:.,.	./.:0:.,.	0/0:20:20,0	0/0:18:18,0	./.:0:.,.	./.:0:.,.	0/1:8:4,4	0/1:15:9,6	0/1:11:8,3
MockRefGenome	125414	.	A	T	.	PASS	AC=15;AF=0.075;DP=980;AV=16.87;NS=39	GT:DP:AD	0/0:11:11,0	1/1:18:0,18	./.:0:.,.	0/0:29:29,0	0/0:13:13,0	./.:0:.,.	./.:0:.,.	./.:0:.,.	0/1:47:24,23	./.:0:.,.	./.:0:.,.	0/0:22:22,0	./.:0:.,.	./.:0:.,.	0/1:17:8,9	./.:0:.,.	1/1:10:0,10	./.:0:.,.	./.:0:.,.	./.:0:.,.	./.:0:.,.	./.:0:.,.	0/0:13:13,0	./.:0:.,.	./.:0:.,.	0/0:13:13,0	1/1:10:0,10	0/0:22:22,0	0/0:16:16,0	0/0:14:14,0	./.:0:.,.	./.:0:.,.	./.:0:.,.	./.:0:.,.	0/0:22:22,0	0/0:21:21,0	./.:0:.,.	./.:0:.,.	./.:0:.,.	0/0:17:17,0	0/0:12:12,0
MockRefGenome	125423	.	T	C	.	PASS	AC=39;AF=0.195;DP=981;AV=16.82;NS=39	GT:DP:AD	1/1:11:0,11	1/1:18:0,18	./.:0:.,.	1/1:29:1,28	0/0:13:13,0	./.:0:.,.	./.:0:.,.	./.:0:.,.	0/0:47:47,0	./.:0:.,.	./.:0:.,.	0/0:22:22,0	0/1:9:5,4	./.:0:.,.	0/0:17:17,0	./.:0:.,.	1/1:10:0,10	./.:0:.,.	./.:0:.,.	./.:0:.,.	./.:0:.,.	./.:0:.,.	0/0:13:13,0	./.:0:.,.	0/0:10:10,0	0/0:13:13,0	0/0:10:10,0	0/0:22:22,0	0/0:16:16,0	0/0:14:14,0	./.:0:.,.	./.:0:.,.	./.:0:.,.	./.:0:.,.	0/0:22:22,0	0/0:21:21,0	./.:0:.,.	./.:0:.,.	./.:0:.,.	0/1:17:8,9	1/1:12:0,12
MockRefGenome	125962	.	G	A	.	PASS	AC=23;AF=0.115;DP=1134;AV=15.41;NS=56	GT:DP:AD	0/1:20:11,9	0/0:52:52,0	0/0:17:17,0	0/1:48:28,20	./.:0:.,.	0/0:10:10,0	0/0:19:19,0	0/0:12:12,0	0/0:27:27,0	0/0:22:22,0	0/0:19:19,0	0/0:12:12,0	0/0:14:14,0	0/0:12:12,0	0/0:20:20,0	./.:0:.,.	0/0:14:14,0	0/0:13:13,0	0/0:10:10,0	0/0:15:15,0	0/0:13:13,0	0/0:10:10,0	0/0:16:16,0	./.:0:.,.	0/0:12:12,0	0/0:17:17,0	0/0:14:14,0	0/0:21:21,0	./.:0:.,.	./.:0:.,.	0/0:12:12,0	0/0:10:10,0	./.:0:.,.	0/0:20:20,0	0/0:11:11,0	./.:0:.,.	./.:0:.,.	./.:0:.,.	./.:0:.,.	0/1:21:13,8	0/1:17:9,8
MockRefGenome	126049	.	G	C	.	PASS	AC=11;AF=0.055;DP=1217;AV=16.87;NS=54	GT:DP:AD	0/0:22:22,0	0/0:55:55,0	0/0:19:19,0	0/0:53:53,0	./.:0:.,.	0/1:13:6,7	1/1:23:0,23	0/0:13:13,0	0/1:31:15,16	0/0:23:23,0	0/0:21:21,0	0/0:13:13,0	0/0:14:14,0	0/0:13:13,0	0/0:20:20,0	./.:0:.,.	0/0:15:15,0	0/0:13:13,0	1/1:11:0,11	0/0:15:15,0	./.:0:.,.	0/0:10:10,0	0/1:16:11,5	./.:0:.,.	0/0:14:14,0	0/0:18:18,0	0/0:14:14,0	0/0:22:22,0	./.:0:.,.	./.:0:.,.	0/1:13:5,8	0/0:10:10,0	./.:0:.,.	0/0:21:21,0	0/0:11:11,0	./.:0:.,.	./.:0:.,.	./.:0:.,.	0/1:11:3,8	0/0:24:24,0	0/0:19:19,0
MockRefGenome	126125	.	G	A	.	PASS	AC=9;AF=0.045;DP=1535;AV=19.35;NS=69	GT:DP:AD	0/0:26:26,0	0/1:45:34,11	0/0:22:22,0	0/0:84:84,0	0/0:20:20,0	0/0:18:18,0	0/0:22:22,0	0/1:10:6,4	0/1:37:22,15	0/0:15:15,0	0/0:18:18,0	0/0:15:15,0	0/1:16:5,11	0/0:14:14,0	0/0:21:21,0	0/1:18:15,3	./.:0:.,.	./.:0:.,.	./.:0:.,.	0/0:15:15,0	0/0:24:24,0	0/0:14:14,0	./.:0:.,.	0/0:10:10,0	0/0:17:17,0	0/0:11:11,0	./.:0:.,.	0/0:23:23,0	0/0:20:20,0	./.:0:.,.	0/1:15:9,6	0/0:18:18,0	0/0:20:20,0	0/0:26:26,0	./.:0:.,.	0/0:17:17,0	0/1:10:6,4	0/0:15:15,0	0/1:24:16,8	0/0:36:36,0	0/0:10:10,0
MockRefGenome	126131	.	C	T	.	PASS	AC=36;AF=0.180;DP=1564;AV=18.80;NS=74	GT:DP:AD	0/1:26:16,10	0/0:45:45,0	0/0:22:22,0	0/1:85:37,48	0/0:20:20,0	0/0:18:18,0	0/0:23:23,0	0/0:10:10,0	0/0:39:39,0	0/0:15:15,0	0/0:18:18,0	0/0:15:15,0	0/0:16:16,0	0/0:14:14,0	0/0:22:22,0	0/0:18:18,0	./.:0:.,.	./.:0:.,.	./.:0:.,.	0/0:15:15,0	0/0:24:24,0	0/0:15:15,0	./.:0:.,.	0/0:10:10,0	0/0:17:17,0	0/0:11:11,0	./.:0:.,.	0/0:24:24,0	0/0:20:20,0	./.:0:.,.	0/0:15:15,0	0/0:18:18,0	0/0:20:20,0	0/0:27:27,0	./.:0:.,.	0/0:19:19,0	0/0:10:10,0	0/1:15:11,4	0/1:25:16,9	0/1:37:23,14	0/1:10:7,3
MockRefGenome	126146	.	G	A	.	PASS	AC=14;AF=0.070;DP=1564;AV=19.59;NS=68	GT:DP:AD	0/0:26:26,0	1/1:45:0,45	0/0:22:22,0	0/0:85:84,1	0/0:20:20,0	0/0:18:18,0	0/0:23:23,0	./.:0:.,.	0/0:39:39,0	0/1:15:9,6	./.:0:.,.	0/0:15:15,0	1/1:16:0,16	0/1:14:8,6	0/0:22:22,0	0/1:18:9,9	./.:0:.,.	./.:0:.,.	./.:0:.,.	0/0:15:15,0	0/0:24:24,0	0/0:15:15,0	./.:0:.,.	0/0:10:10,0	0/0:17:17,0	0/0:11:11,0	./.:0:.,.	0/0:24:24,0	0/0:20:20,0	./.:0:.,.	0/0:15:15,0	0/0:18:18,0	0/0:20:20,0	0/0:27:27,0	./.:0:.,.	0/0:19:19,0	1/1:10:0,10	0/0:15:15,0	0/0:25:25,0	0/0:37:37,0	0/0:10:10,0
MockRefGenome	126179	.	A	G	.	PASS	AC=27;AF=0.135;DP=1522;AV=18.80;NS=69	GT:DP:AD	0/0:25:25,0	1/1:45:0,45	0/0:22:22,0	0/0:83:82,1	0/0:19:19,0	0/0:15:15,0	0/1:22:13,9	1/1:10:0,10	0/0:39:39,0	./.:0:.,.	./.:0:.,.	0/0:15:15,0	1/1:16:0,16	1/1:14:0,14	0/0:21:21,0	0/1:18:3,15	0/1:8:4,4	0/1:7:4,3	./.:0:.,.	0/0:15:15,0	0/0:22:22,0	0/0:13:13,0	./.:0:.,.	./.:0:.,.	0/1:17:7,10	0/0:11:11,0	0/1:9:6,3	0/1:24:11,13	0/0:20:20,0	./.:0:.,.	0/0:12:12,0	0/0:17:17,0	0/0:20:20,0	0/0:27:27,0	0/1:8:5,3	0/0:19:19,0	1/1:10:0,10	0/0:13:13,0	0/0:25:25,0	0/1:36:26,10	0/0:10:10,0
MockRefGenome	126188	.	A	G	.	PASS	AC=11;AF=0.055;DP=1516;AV=19.32;NS=68	GT:DP:AD	0/0:25:25,0	0/0:45:45,0	0/0:22:22,0	0/0:83:83,0	0/0:19:19,0	0/1:15:6,9	0/0:22:22,0	0/0:10:10,0	0/0:38:38,0	0/0:13:13,0	0/0:17:17,0	0/0:15:15,0	0/0:16:16,0	0/0:14:14,0	0/1:21:9,12	0/0:18:18,0	./.:0:.,.	./.:0:.,.	./.:0:.,.	1/1:15:0,15	1/1:22:0,22	0/1:13:9,4	./.:0:.,.	./.:0:.,.	0/0:17:17,0	0/0:11:11,0	./.:0:.,.	0/0:24:24,0	0/0:20:20,0	./.:0:.,.	0/0:11:11,0	0/0:17:17,0	0/0:20:20,0	0/0:27:27,0	./.:0:.,.	0/0:19:19,0	0/0:10:10,0	0/0:13:13,0	0/0:24:24,0	0/0:36:36,0	0/0:10:10,0
MockRefGenome	126245	.	C	T	.	PASS	AC=38;AF=0.190;DP=1477;AV=18.03;NS=72	GT:DP:AD	0/1:25:15,10	0/0:42:42,0	0/0:21:20,1	0/1:81:34,47	0/0:19:19,0	0/0:15:15,0	0/0:21:21,0	0/0:10:10,0	0/0:37:37,0	0/0:13:13,0	0/0:16:16,0	0/0:15:15,0	0/0:16:16,0	0/0:14:14,0	0/0:21:21,0	0/0:18:18,0	./.:0:.,.	./.:0:.,.	./.:0:.,.	0/0:15:15,0	0/0:21:21,0	0/0:13:13,0	./.:0:.,.	./.:0:.,.	0/0:15:15,0	0/0:10:10,0	./.:0:.,.	0/0:23:23,0	0/0:19:19,0	./.:0:.,.	0/0:11:11,0	0/0:17:17,0	0/0:20:20,0	0/0:27:27,0	./.:0:.,.	0/0:18:18,0	0/0:10:10,0	0/1:13:9,4	0/1:24:15,9	0/1:34:21,13	0/1:9:6,3
MockRefGenome	126258	.	T	C	.	PASS	AC=42;AF=0.210;DP=1465;AV=18.39;NS=70	GT:DP:AD	0/0:25:25,0	0/0:42:42,0	0/0:21:21,0	0/0:81:81,0	1/1:19:0,19	0/0:15:15,0	1/1:21:0,21	0/0:10:10,0	0/1:37:15,22	0/0:13:13,0	0/0:16:16,0	1/1:15:0,15	0/0:16:16,0	0/0:14:14,0	0/1:21:12,9	0/0:17:17,0	./.:0:.,.	./.:0:.,.	./.:0:.,.	0/0:15:15,0	0/0:20:20,0	0/0:13:13,0	./.:0:.,.	./.:0:.,.	0/1:15:7,8	1/1:10:0,10	./.:0:.,.	1/1:23:0,23	1/1:18:0,18	./.:0:.,.	0/1:11:7,4	1/1:17:0,17	0/1:20:14,6	0/0:26:26,0	./.:0:.,.	1/1:17:0,17	0/0:10:10,0	0/1:13:8,5	0/1:24:17,7	0/1:33:12,21	0/1:9:6,3
MockRefGenome	126347	.	G	A	.	PASS	AC=35;AF=0.175;DP=1524;AV=18.23;NS=73	GT:DP:AD	0/1:26:16,10	0/0:44:44,0	0/0:22:22,0	0/1:79:35,44	0/0:18:18,0	0/0:17:17,0	0/0:22:22,0	0/0:10:10,0	0/0:38:38,0	0/0:15:15,0	0/0:17:17,0	0/0:15:15,0	0/0:16:16,0	0/0:18:18,0	0/0:19:19,0	0/0:18:18,0	0/0:16:16,0	./.:0:.,.	./.:0:.,.	0/0:15:15,0	0/0:23:23,0	0/0:12:12,0	./.:0:.,.	0/0:10:10,0	0/0:17:17,0	0/0:10:10,0	./.:0:.,.	0/0:24:24,0	0/0:19:19,0	./.:0:.,.	0/0:14:14,0	0/0:18:18,0	0/0:20:20,0	0/0:24:24,0	./.:0:.,.	0/0:17:17,0	0/0:10:10,0	0/1:13:9,4	0/1:24:16,8	0/1:38:24,14	0/1:10:7,3
MockRefGenome	126371	.	G	T	.	PASS	AC=13;AF=0.065;DP=1552;AV=19.34;NS=70	GT:DP:AD	0/0:26:26,0	0/0:44:44,0	1/1:22:0,22	0/0:81:81,0	0/0:18:18,0	0/1:17:10,7	0/1:22:13,9	0/0:10:10,0	0/0:39:39,0	0/0:15:15,0	0/0:18:18,0	0/0:15:15,0	0/0:17:17,0	0/0:18:18,0	0/0:20:20,0	0/0:18:18,0	0/0:16:16,0	0/0:10:10,0	./.:0:.,.	0/0:15:15,0	0/0:23:23,0	0/1:13:3,10	./.:0:.,.	1/1:10:0,10	0/1:17:10,7	0/0:10:10,0	./.:0:.,.	0/0:25:25,0	0/0:20:20,0	./.:0:.,.	0/1:15:6,9	0/0:18:18,0	0/0:20:20,0	0/0:26:26,0	./.:0:.,.	0/0:18:18,0	0/0:10:10,0	0/1:14:10,4	0/0:24:24,0	0/0:38:38,0	0/1:10:7,3
MockRefGenome	126401	.	C	T	.	PASS	AC=17;AF=0.085;DP=1587;AV=19.32;NS=72	GT:DP:AD	0/0:26:26,0	0/0:46:46,0	0/0:22:22,0	0/0:84:84,0	0/0:20:20,0	0/0:18:18,0	0/0:23:23,0	./.:0:.,.	0/0:39:39,0	./.:0:.,.	./.:0:.,.	0/0:15:15,0	0/0:17:17,0	0/1:18:10,8	0/0:21:21,0	0/0:18:18,0	0/0:17:17,0	0/0:12:12,0	./.:0:.,.	0/0:15:15,0	0/0:23:23,0	0/0:13:13,0	./.:0:.,.	0/0:10:10,0	0/0:17:17,0	./.:0:.,.	./.:0:.,.	0/0:25:25,0	0/0:20:20,0	./.:0:.,.	0/0:15:15,0	0/0:18:18,0	0/0:20:20,0	0/0:27:27,0	./.:0:.,.	0/0:18:18,0	0/0:10:10,0	0/1:14:8,6	0/1:24:16,8	0/1:37:24,13	0/1:10:6,4
MockRefGenome	126561	.	G	A	.	PASS	AC=58;AF=0.290;DP=1101;AV=15.52;NS=52	GT:DP:AD	1/0:18:7,11	1/0:41:8,33	./.:0:.,.	0/0:33:0,33	1/0:16:8,8	./.:0:.,.	1/1:15:15,0	0/0:11:0,11	1/1:41:41,0	1/0:6:3,3	0/0:15:0,15	./.:0:.,.	1/0:18:3,15	./.:0:.,.	./.:0:.,.	0/0:10:0,10	0/0:14:0,14	1/0:20:6,14	1/1:15:15,0	1/1:12:12,0	1/1:13:13,0	1/1:11:11,0	1/1:10:10,0	./.:0:.,.	1/1:13:13,0	1/1:17:17,0	1/1:18:18,0	1/1:20:20,0	1/1:12:12,0	./.:0:.,.	1/1:12:12,0	1/1:13:13,0	1/1:13:13,0	1/1:19:19,0	./.:0:.,.	1/1:14:14,0	0/0:10:0,10	1/0:14:9,5	1/0:10:7,3	1/0:18:9,9	./.:0:.,.
MockRefGenome	126654	.	T	C	.	PASS	AC=17;AF=0.085;DP=1090;AV=16.06;NS=49	GT:DP:AD	0/0:19:19,0	0/1:40:8,32	0/0:19:19,0	0/0:33:33,0	0/0:16:16,0	./.:0:.,.	0/0:15:15,0	1/1:11:0,11	0/0:41:41,0	./.:0:.,.	1/1:15:0,15	./.:0:.,.	1/1:18:0,18	./.:0:.,.	./.:0:.,.	1/1:11:0,11	1/1:14:0,14	0/1:19:6,13	0/0:14:14,0	0/0:13:13,0	0/0:16:16,0	./.:0:.,.	0/0:10:10,0	./.:0:.,.	0/0:13:13,0	0/0:17:17,0	0/0:19:19,0	0/0:20:20,0	0/0:13:13,0	./.:0:.,.	0/0:12:12,0	0/0:13:13,0	0/0:13:13,0	0/0:19:19,0	./.:0:.,.	0/0:13:13,0	./.:0:.,.	0/0:14:14,0	0/0:11:11,0	0/0:18:18,0	./.:0:.,.
MockRefGenome	126672	.	T	C	.	PASS	AC=56;AF=0.280;DP=1098;AV=15.58;NS=50	GT:DP:AD	1/0:19:7,12	1/0:40:8,32	./.:0:.,.	0/0:33:0,33	1/0:16:8,8	./.:0:.,.	1/1:15:15,0	0/0:11:0,11	1/1:41:41,0	./.:0:.,.	0/0:15:0,15	./.:0:.,.	0/0:18:0,18	./.:0:.,.	./.:0:.,.	0/0:11:0,11	0/0:14:0,14	1/0:19:6,13	1/1:14:14,0	1/1:13:13,0	1/1:16:16,0	1/1:10:10,0	1/1:10:10,0	./.:0:.,.	1/1:14:14,0	1/1:17:17,0	1/1:19:19,0	./.:0:.,.	1/1:13:13,0	./.:0:.,.	1/1:12:12,0	1/1:13:13,0	1/1:13:13,0	1/1:20:20,0	./.:0:.,.	1/1:13:13,0	./.:0:.,.	1/0:14:9,5	1/0:11:8,3	1/0:18:9,9	./.:0:.,.
MockRefGenome	126699	.	G	T	.	PASS	AC=26;AF=0.130;DP=1125;AV=15.62;NS=53	GT:DP:AD	0/1:19:7,12	0/0:41:41,0	./.:0:.,.	1/1:33:1,32	0/0:16:16,0	./.:0:.,.	0/0:15:15,0	0/0:11:11,0	0/0:42:42,0	./.:0:.,.	0/0:15:15,0	./.:0:.,.	0/0:18:18,0	./.:0:.,.	./.:0:.,.	0/0:11:11,0	0/0:15:15,0	0/0:20:20,0	0/0:15:15,0	0/0:13:13,0	0/0:16:16,0	0/0:11:11,0	0/0:10:10,0	./.:0:.,.	0/0:14:14,0	0/0:17:17,0	0/0:20:20,0	0/0:20:20,0	0/0:13:13,0	./.:0:.,.	0/0:13:13,0	0/0:13:13,0	0/0:13:13,0	0/0:20:20,0	./.:0:.,.	0/0:14:14,0	0/0:10:10,0	0/1:14:9,5	0/1:11:8,3	0/1:19:9,10	./.:0:.,.
MockRefGenome	126741	.	C	G	.	PASS	AC=28;AF=0.140;DP=1143;AV=15.92;NS=53	GT:DP:AD	0/1:20:8,12	0/0:41:41,0	./.:0:.,.	1/1:34:0,34	0/1:16:8,8	./.:0:.,.	0/0:16:16,0	0/0:11:11,0	0/0:43:43,0	./.:0:.,.	0/0:15:15,0	./.:0:.,.	0/0:18:18,0	./.:0:.,.	./.:0:.,.	0/0:11:11,0	0/0:16:16,0	0/0:20:20,0	0/0:15:15,0	0/0:13:13,0	0/0:16:16,0	0/0:11:11,0	0/0:10:10,0	./.:0:.,.	0/0:14:14,0	0/0:17:17,0	0/0:20:20,0	0/0:20:20,0	0/0:13:13,0	./.:0:.,.	0/0:13:13,0	0/0:13:13,0	0/0:13:13,0	0/0:20:20,0	./.:0:.,.	0/0:14:14,0	0/0:10:10,0	0/1:14:9,5	0/1:11:8,3	0/1:20:9,11	./.:0:.,.
MockRefGenome	126860	.	T	C	.	PASS	AC=15;AF=0.075;DP=992;AV=15.50;NS=42	GT:DP:AD	./.:0:.,.	0/0:75:75,0	0/0:15:15,0	1/1:33:1,32	./.:0:.,.	0/0:11:11,0	0/0:21:21,0	./.:0:.,.	0/0:24:24,0	./.:0:.,.	./.:0:.,.	./.:0:.,.	./.:0:.,.	0/0:19:19,0	0/0:15:15,0	0/0:14:14,0	./.:0:.,.	0/0:15:15,0	0/0:17:17,0	0/0:11:11,0	0/0:10:10,0	./.:0:.,.	0/0:14:14,0	0/0:13:13,0	0/0:15:15,0	./.:0:.,.	0/0:12:12,0	0/0:18:18,0	./.:0:.,.	0/0:13:13,0	0/0:11:11,0	0/0:11:11,0	./.:0:.,.	./.:0:.,.	0/0:13:13,0	0/0:11:11,0	0/0:16:16,0	0/1:7:4,3	./.:0:.,.	./.:0:.,.	0/1:10:5,5
MockRefGenome	126880	.	A	G	.	PASS	AC=29;AF=0.145;DP=975;AV=15.43;NS=40	GT:DP:AD	./.:0:.,.	0/1:75:23,52	0/0:15:15,0	1/1:33:1,32	./.:0:.,.	0/0:11:11,0	0/0:21:21,0	./.:0:.,.	0/0:22:22,0	./.:0:.,.	./.:0:.,.	./.:0:.,.	0/1:9:4,5	1/1:19:0,19	0/0:15:15,0	1/1:14:0,14	./.:0:.,.	0/1:15:3,12	0/0:17:17,0	0/0:11:11,0	0/1:10:5,5	./.:0:.,.	0/0:14:14,0	0/0:13:13,0	0/0:15:15,0	./.:0:.,.	0/0:12:12,0	0/0:18:18,0	./.:0:.,.	0/0:13:13,0	0/0:11:11,0	0/0:11:11,0	./.:0:.,.	./.:0:.,.	0/0:12:12,0	0/0:11:11,0	0/1:16:3,13	0/1:7:4,3	./.:0:.,.	./.:0:.,.	0/1:10:5,5
MockRefGenome	126916	.	G	A	.	PASS	AC=24;AF=0.120;DP=957;AV=14.85;NS=39	GT:DP:AD	./.:0:.,.	0/0:75:75,0	0/1:11:3,8	0/0:32:32,0	./.:0:.,.	1/1:11:0,11	0/1:19:7,12	./.:0:.,.	0/1:22:9,13	0/1:6:3,3	0/0:13:13,0	./.:0:.,.	0/1:9:5,4	0/0:19:19,0	1/1:15:0,15	0/0:14:14,0	./.:0:.,.	0/0:15:15,0	1/1:16:0,16	1/1:11:0,11	./.:0:.,.	./.:0:.,.	./.:0:.,.	1/1:13:0,13	0/0:14:14,0	./.:0:.,.	0/1:12:7,5	./.:0:.,.	./.:0:.,.	0/0:13:13,0	0/1:11:6,5	0/0:11:11,0	./.:0:.,.	./.:0:.,.	0/0:12:12,0	0/0:11:11,0	./.:0:.,.	./.:0:.,.	./.:0:.,.	./.:0:.,.	0/0:10:10,0
MockRefGenome	126946	.	G	A	.	PASS	AC=9;AF=0.045;DP=905;AV=15.03;NS=36	GT:DP:AD	./.:0:.,.	0/0:66:66,0	0/0:14:14,0	0/0:29:28,1	./.:0:.,.	0/1:10:7,3	0/0:18:18,0	./.:0:.,.	0/0:24:24,0	./.:0:.,.	0/0:11:11,0	./.:0:.,.	./.:0:.,.	0/0:18:18,0	0/1:14:8,6	0/0:11:11,0	0/0:13:13,0	0/0:15:15,0	0/1:17:10,7	1/1:10:0,10	./.:0:.,.	./.:0:.,.	./.:0:.,.	0/1:12:7,5	./.:0:.,.	./.:0:.,.	0/0:11:11,0	0/0:17:17,0	./.:0:.,.	0/0:13:13,0	0/0:11:11,0	0/0:10:10,0	0/0:11:11,0	0/0:17:17,0	./.:0:.,.	./.:0:.,.	0/0:13:13,0	./.:0:.,.	./.:0:.,.	./.:0:.,.	0/0:10:10,0
MockRefGenome	126976	.	A	G	.	PASS	AC=7;AF=0.035;DP=978;AV=15.12;NS=42	GT:DP:AD	./.:0:.,.	0/0:71:71,0	0/1:14:7,7	0/0:32:32,0	./.:0:.,.	0/0:10:10,0	0/1:20:14,6	./.:0:.,.	0/0:24:24,0	./.:0:.,.	0/0:12:12,0	./.:0:.,.	./.:0:.,.	0/0:19:19,0	0/0:15:15,0	0/0:12:12,0	0/0:14:14,0	0/0:15:15,0	0/0:17:17,0	0/0:11:11,0	./.:0:.,.	./.:0:.,.	0/0:13:13,0	0/0:13:13,0	0/0:13:13,0	0/1:6:3,3	0/0:12:12,0	0/0:17:17,0	./.:0:.,.	0/0:13:13,0	0/1:11:6,5	0/0:10:10,0	0/0:11:11,0	0/0:18:18,0	0/1:9:6,3	./.:0:.,.	0/0:14:14,0	./.:0:.,.	./.:0:.,.	./.:0:.,.	0/0:10:10,0
MockRefGenome	126999	.	G	T	.	PASS	AC=9;AF=0.045;DP=1000;AV=15.33;NS=42	GT:DP:AD	./.:0:.,.	0/0:72:72,0	0/0:15:15,0	0/0:33:33,0	./.:0:.,.	0/1:10:7,3	0/0:20:20,0	./.:0:.,.	0/0:24:24,0	./.:0:.,.	0/0:13:13,0	./.:0:.,.	./.:0:.,.	0/0:19:19,0	0/1:15:8,7	0/0:13:13,0	0/0:14:14,0	0/0:15:15,0	0/1:17:10,7	1/1:11:0,11	./.:0:.,.	./.:0:.,.	./.:0:.,.	0/1:13:7,6	0/0:13:13,0	./.:0:.,.	0/0:12:12,0	0/0:18:18,0	./.:0:.,.	0/0:13:13,0	0/0:11:11,0	0/0:11:11,0	0/0:12:12,0	0/0:18:18,0	0/0:10:10,0	0/0:10:10,0	0/0:15:15,0	./.:0:.,.	./.:0:.,.	./.:0:.,.	0/0:10:10,0
MockRefGenome	127004	.	C	A	.	PASS	AC=18;AF=0.090;DP=1003;AV=15.09;NS=43	GT:DP:AD	./.:0:.,.	0/1:73:51,22	0/0:15:15,0	0/0:33:33,0	./.:0:.,.	0/1:11:7,4	0/0:20:20,0	./.:0:.,.	0/0:24:24,0	./.:0:.,.	0/0:13:13,0	./.:0:.,.	0/1:9:5,4	0/0:19:19,0	0/1:15:8,7	./.:0:.,.	0/1:14:7,7	0/0:15:15,0	0/1:17:10,7	1/1:11:0,11	./.:0:.,.	./.:0:.,.	./.:0:.,.	0/1:13:7,6	0/0:13:13,0	./.:0:.,.	0/0:12:12,0	0/0:18:18,0	./.:0:.,.	0/0:13:13,0	0/0:11:11,0	0/0:11:11,0	1/1:12:0,12	1/1:18:0,18	0/0:10:10,0	0/0:10:10,0	0/1:15:11,4	./.:0:.,.	./.:0:.,.	./.:0:.,.	0/0:10:10,0
MockRefGenome	127027	.	G	A	.	PASS	AC=8;AF=0.040;DP=1020;AV=15.04;NS=48	GT:DP:AD	./.:0:.,.	0/1:73:45,28	0/0:15:15,0	0/0:33:33,0	./.:0:.,.	0/0:11:11,0	0/0:20:20,0	./.:0:.,.	0/0:24:24,0	./.:0:.,.	0/1:13:9,4	./.:0:.,.	./.:0:.,.	0/1:19:14,5	0/0:15:15,0	0/0:14:14,0	0/0:14:14,0	0/0:15:15,0	0/0:17:17,0	0/0:11:11,0	0/0:10:10,0	./.:0:.,.	0/0:13:13,0	0/0:13:13,0	0/0:15:15,0	./.:0:.,.	0/0:12:12,0	0/0:18:18,0	./.:0:.,.	0/0:14:14,0	0/0:11:11,0	0/0:11:11,0	0/0:12:12,0	0/0:19:19,0	0/0:10:10,0	0/0:10:10,0	0/0:15:15,0	./.:0:.,.	./.:0:.,.	./.:0:.,.	0/0:10:10,0
MockRefGenome	127039	.	A	G	.	PASS	AC=15;AF=0.075;DP=1032;AV=15.08;NS=48	GT:DP:AD	./.:0:.,.	0/1:75:29,46	0/0:15:15,0	0/0:33:33,0	./.:0:.,.	0/0:11:11,0	0/0:20:20,0	./.:0:.,.	0/0:24:24,0	./.:0:.,.	0/0:13:13,0	./.:0:.,.	0/1:9:5,4	0/0:19:19,0	0/0:15:15,0	./.:0:.,.	0/1:14:7,7	0/1:15:12,3	0/0:17:17,0	0/0:11:11,0	0/0:10:10,0	./.:0:.,.	0/0:13:13,0	0/0:13:13,0	0/0:15:15,0	./.:0:.,.	0/0:12:12,0	0/0:18:18,0	./.:0:.,.	0/0:14:14,0	0/0:12:12,0	0/0:11:11,0	1/1:12:0,12	1/1:19:0,19	0/0:12:12,0	0/0:10:10,0	0/1:16:12,4	./.:0:.,.	./.:0:.,.	./.:0:.,.	0/0:10:10,0
MockRefGenome	127793	.	C	A	.	PASS	AC=14;AF=0.070;DP=1156;AV=18.50;NS=52	GT:DP:AD	0/0:44:44,0	0/0:39:39,0	0/0:16:16,0	0/0:61:61,0	0/1:7:4,3	0/0:11:11,0	0/0:20:20,0	./.:0:.,.	0/1:22:17,5	./.:0:.,.	./.:0:.,.	./.:0:.,.	./.:0:.,.	./.:0:.,.	0/0:35:35,0	./.:0:.,.	./.:0:.,.	./.:0:.,.	0/0:14:14,0	0/0:16:16,0	./.:0:.,.	0/0:20:20,0	0/0:17:17,0	0/0:32:32,0	./.:0:.,.	./.:0:.,.	./.:0:.,.	1/1:21:1,20	0/1:22:13,9	0/0:18:18,0	./.:0:.,.	0/1:27:17,10	1/1:12:0,12	1/1:15:0,15	0/1:17:13,4	0/0:15:15,0	./.:0:.,.	0/0:11:11,0	0/0:18:18,0	0/1:17:6,11	./.:0:.,.
MockRefGenome	127805	.	A	G	.	PASS	AC=22;AF=0.110;DP=1156;AV=17.92;NS=52	GT:DP:AD	0/1:44:25,19	0/0:39:39,0	1/1:16:0,16	0/0:61:61,0	./.:0:.,.	0/0:11:11,0	0/0:20:20,0	./.:0:.,.	0/1:22:5,17	./.:0:.,.	./.:0:.,.	./.:0:.,.	./.:0:.,.	./.:0:.,.	0/1:35:18,17	./.:0:.,.	./.:0:.,.	./.:0:.,.	0/0:14:14,0	0/0:16:16,0	./.:0:.,.	0/1:20:14,6	0/0:17:17,0	0/0:32:32,0	./.:0:.,.	./.:0:.,.	./.:0:.,.	0/0:21:20,1	0/0:22:22,0	0/0:18:18,0	./.:0:.,.	0/0:27:27,0	0/0:12:12,0	0/0:15:15,0	0/0:17:17,0	0/0:15:15,0	./.:0:.,.	0/1:11:6,5	0/0:18:18,0	0/0:17:17,0	./.:0:.,.
MockRefGenome	127822	.	G	T	.	PASS	AC=12;AF=0.060;DP=1154;AV=18.00;NS=52	GT:DP:AD	0/1:44:25,19	0/0:39:39,0	0/0:16:16,0	0/0:61:61,0	./.:0:.,.	0/0:11:11,0	0/0:20:20,0	./.:0:.,.	0/0:22:22,0	./.:0:.,.	./.:0:.,.	./.:0:.,.	./.:0:.,.	./.:0:.,.	0/0:35:35,0	./.:0:.,.	./.:0:.,.	./.:0:.,.	0/0:14:14,0	0/0:16:16,0	./.:0:.,.	0/0:20:20,0	0/0:17:17,0	0/0:32:32,0	./.:0:.,.	./.:0:.,.	./.:0:.,.	0/0:21:21,0	0/0:22:22,0	0/0:18:18,0	./.:0:.,.	0/0:27:27,0	0/0:12:12,0	0/0:15:15,0	0/0:17:17,0	0/0:15:15,0	./.:0:.,.	0/1:11:6,5	0/0:18:18,0	0/0:17:17,0	./.:0:.,.
MockRefGenome	127834	.	C	T	.	PASS	AC=6;AF=0.030;DP=1141;AV=18.68;NS=50	GT:DP:AD	0/0:44:44,0	0/0:37:37,0	0/0:16:16,0	0/0:61:61,0	./.:0:.,.	0/1:10:6,4	0/0:20:20,0	./.:0:.,.	0/0:21:21,0	./.:0:.,.	./.:0:.,.	./.:0:.,.	./.:0:.,.	./.:0:.,.	0/0:35:35,0	./.:0:.,.	./.:0:.,.	./.:0:.,.	0/1:14:6,8	0/0:16:16,0	./.:0:.,.	0/1:18:11,7	0/0:17:17,0	0/0:32:32,0	./.:0:.,.	./.:0:.,.	./.:0:.,.	0/0:21:21,0	0/0:22:22,0	0/0:17:17,0	./.:0:.,.	0/0:27:27,0	0/0:12:12,0	0/0:15:15,0	0/0:17:17,0	0/0:15:15,0	./.:0:.,.	0/0:11:11,0	0/0:17:17,0	0/0:17:17,0	./.:0:.,.
MockRefGenome	127836	.	C	A	.	PASS	AC=7;AF=0.035;DP=1140;AV=18.62;NS=50	GT:DP:AD	0/0:44:44,0	0/0:37:37,0	1/1:16:0,16	0/0:61:61,0	./.:0:.,.	0/0:10:10,0	0/0:20:20,0	./.:0:.,.	0/1:21:5,16	./.:0:.,.	./.:0:.,.	./.:0:.,.	./.:0:.,.	./.:0:.,.	0/1:35:18,17	./.:0:.,.	./.:0:.,.	./.:0:.,.	0/0:14:14,0	0/0:16:16,0	./.:0:.,.	0/1:18:13,5	0/0:17:17,0	0/0:32:32,0	./.:0:.,.	./.:0:.,.	./.:0:.,.	0/0:21:20,1	0/0:22:22,0	0/0:17:17,0	./.:0:.,.	0/0:27:27,0	0/0:12:12,0	0/0:15:15,0	0/0:17:17,0	0/0:15:15,0	./.:0:.,.	0/0:11:11,0	0/0:17:17,0	0/0:17:17,0	./.:0:.,.
MockRefGenome	127839	.	G	A	.	PASS	AC=29;AF=0.145;DP=1115;AV=17.38;NS=52	GT:DP:AD	0/1:43:24,19	0/0:37:37,0	1/1:16:0,16	0/0:61:61,0	0/1:7:3,4	0/0:10:10,0	0/0:20:20,0	./.:0:.,.	0/1:21:5,16	./.:0:.,.	./.:0:.,.	./.:0:.,.	./.:0:.,.	./.:0:.,.	0/1:35:18,17	./.:0:.,.	./.:0:.,.	./.:0:.,.	0/0:14:14,0	0/0:16:16,0	./.:0:.,.	0/1:18:13,5	0/0:17:17,0	0/0:32:32,0	./.:0:.,.	./.:0:.,.	./.:0:.,.	./.:0:.,.	0/1:21:12,9	0/0:17:17,0	./.:0:.,.	0/1:27:17,10	0/0:12:12,0	0/0:15:15,0	1/1:17:0,17	0/0:15:15,0	./.:0:.,.	./.:0:.,.	0/1:17:7,10	0/0:17:17,0	./.:0:.,.
MockRefGenome	127894	.	T	C	.	PASS	AC=45;AF=0.225;DP=1117;AV=17.40;NS=50	GT:DP:AD	0/1:43:19,24	0/0:37:37,0	0/0:16:16,0	1/1:61:1,60	0/1:7:3,4	0/1:10:6,4	0/0:20:20,0	./.:0:.,.	0/0:21:21,0	./.:0:.,.	./.:0:.,.	./.:0:.,.	./.:0:.,.	./.:0:.,.	0/0:35:35,0	./.:0:.,.	./.:0:.,.	./.:0:.,.	0/1:14:6,8	0/0:16:16,0	./.:0:.,.	0/1:18:11,7	0/1:16:5,11	0/0:32:32,0	./.:0:.,.	./.:0:.,.	./.:0:.,.	0/0:21:21,0	0/1:21:12,9	0/1:17:8,9	./.:0:.,.	1/1:27:0,27	0/0:12:12,0	0/0:15:15,0	1/1:17:0,17	0/0:13:13,0	./.:0:.,.	./.:0:.,.	0/1:17:10,7	0/1:17:11,6	./.:0:.,.
MockRefGenome	127978	.	A	G	.	PASS	AC=10;AF=0.050;DP=1035;AV=19.28;NS=43	GT:DP:AD	0/0:25:25,0	0/0:39:39,0	0/0:15:15,0	0/0:59:59,0	0/1:7:3,4	0/0:11:11,0	0/0:19:19,0	./.:0:.,.	0/0:21:21,0	./.:0:.,.	./.:0:.,.	./.:0:.,.	./.:0:.,.	./.:0:.,.	0/0:36:36,0	./.:0:.,.	./.:0:.,.	./.:0:.,.	0/0:14:14,0	0/0:16:16,0	./.:0:.,.	0/0:20:20,0	0/0:17:17,0	0/0:28:28,0	./.:0:.,.	./.:0:.,.	./.:0:.,.	0/0:33:33,0	0/1:24:12,12	0/1:19:9,10	./.:0:.,.	1/1:31:0,31	0/0:12:12,0	0/0:15:15,0	1/1:18:0,18	0/0:16:16,0	./.:0:.,.	./.:0:.,.	0/0:16:16,0	0/0:18:18,0	./.:0:.,.
MockRefGenome	128032	.	T	C	.	PASS	AC=18;AF=0.090;DP=1062;AV=18.61;NS=44	GT:DP:AD	1/1:25:0,25	0/0:39:39,0	0/0:15:15,0	0/0:61:61,0	./.:0:.,.	0/0:11:11,0	0/0:19:19,0	./.:0:.,.	0/0:23:23,0	./.:0:.,.	./.:0:.,.	./.:0:.,.	./.:0:.,.	./.:0:.,.	0/0:36:36,0	./.:0:.,.	./.:0:.,.	./.:0:.,.	0/0:14:14,0	0/0:16:16,0	./.:0:.,.	0/0:20:20,0	./.:0:.,.	0/0:30:29,1	./.:0:.,.	./.:0:.,.	./.:0:.,.	0/0:35:35,0	0/0:24:24,0	0/0:20:20,0	./.:0:.,.	0/0:31:31,0	0/0:12:12,0	0/0:15:15,0	0/0:18:18,0	0/0:17:17,0	./.:0:.,.	./.:0:.,.	0/1:18:11,7	0/1:18:12,6	./.:0:.,.
MockRefGenome	128035	.	T	C	.	PASS	AC=29;AF=0.145;DP=1063;AV=18.93;NS=44	GT:DP:AD	1/1:25:0,25	0/0:39:39,0	0/0:15:15,0	0/0:61:60,1	./.:0:.,.	0/0:11:11,0	0/0:19:19,0	./.:0:.,.	0/0:23:23,0	./.:0:.,.	./.:0:.,.	./.:0:.,.	./.:0:.,.	./.:0:.,.	0/0:36:36,0	./.:0:.,.	./.:0:.,.	./.:0:.,.	0/0:14:14,0	0/0:16:16,0	./.:0:.,.	0/0:20:20,0	./.:0:.,.	0/0:30:30,0	./.:0:.,.	./.:0:.,.	./.:0:.,.	0/0:35:35,0	0/1:24:12,12	0/1:20:9,11	./.:0:.,.	0/1:31:19,12	0/0:12:12,0	0/0:15:15,0	0/1:18:13,5	0/1:17:10,7	./.:0:.,.	./.:0:.,.	0/1:18:10,8	0/1:18:11,7	./.:0:.,.
MockRefGenome	128057	.	G	A	.	PASS	AC=10;AF=0.050;DP=1085;AV=19.71;NS=45	GT:DP:AD	0/0:25:25,0	0/0:39:39,0	1/1:16:0,16	0/0:62:62,0	./.:0:.,.	0/0:11:11,0	0/0:20:20,0	./.:0:.,.	0/1:23:5,18	./.:0:.,.	./.:0:.,.	./.:0:.,.	./.:0:.,.	./.:0:.,.	0/0:36:36,0	./.:0:.,.	./.:0:.,.	./.:0:.,.	0/0:14:14,0	0/0:16:16,0	./.:0:.,.	0/1:21:14,7	0/0:17:17,0	0/0:32:32,0	./.:0:.,.	./.:0:.,.	./.:0:.,.	0/1:36:21,15	0/0:25:25,0	0/0:20:20,0	./.:0:.,.	0/0:31:31,0	0/0:12:12,0	0/0:15:15,0	0/0:18:18,0	0/0:17:17,0	./.:0:.,.	./.:0:.,.	0/0:19:19,0	0/0:18:18,0	./.:0:.,.
MockRefGenome	128061	.	C	T	.	PASS	AC=11;AF=0.055;DP=1086;AV=19.52;NS=44	GT:DP:AD	0/0:25:25,0	1/1:39:0,39	0/0:16:16,0	1/1:62:1,61	./.:0:.,.	0/0:11:11,0	0/0:20:20,0	./.:0:.,.	0/0:23:23,0	./.:0:.,.	./.:0:.,.	./.:0:.,.	./.:0:.,.	./.:0:.,.	0/0:36:36,0	./.:0:.,.	./.:0:.,.	./.:0:.,.	0/0:14:14,0	0/0:16:16,0	./.:0:.,.	0/0:21:21,0	0/0:17:17,0	0/0:32:32,0	./.:0:.,.	./.:0:.,.	./.:0:.,.	0/0:36:36,0	0/0:25:25,0	0/0:20:20,0	./.:0:.,.	0/0:31:31,0	0/0:12:12,0	0/0:15:15,0	0/0:18:18,0	0/1:17:7,10	./.:0:.,.	./.:0:.,.	0/0:19:19,0	./.:0:.,.	./.:0:.,.
MockRefGenome	128271	.	T	A	.	PASS	AC=25;AF=0.125;DP=433;AV=12.85;NS=26	GT:DP:AD	0/0:10:10,0	./.:0:.,.	./.:0:.,.	./.:0:.,.	./.:0:.,.	./.:0:.,.	./.:0:.,.	./.:0:.,.	./.:0:.,.	./.:0:.,.	./.:0:.,.	./.:0:.,.	./.:0:.,.	./.:0:.,.	./.:0:.,.	./.:0:.,.	./.:0:.,.	./.:0:.,.	./.:0:.,.	./.:0:.,.	./.:0:.,.	./.:0:.,.	./.:0:.,.	./.:0:.,.	./.:0:.,.	./.:0:.,.	./.:0:.,.	./.:0:.,.	./.:0:.,.	./.:0:.,.	./.:0:.,.	./.:0:.,.	./.:0:.,.	./.:0:.,.	./.:0:.,.	./.:0:.,.	./.:0:.,.	0/1:10:5,5	./.:0:.,.	0/1:10:5,5	./.:0:.,.
MockRefGenome	128460	.	G	A	.	PASS	AC=31;AF=0.155;DP=1294;AV=16.89;NS=64	GT:DP:AD	0/1:21:11,10	0/0:68:68,0	0/0:19:19,0	0/1:53:28,25	0/0:17:17,0	0/0:20:20,0	0/0:21:21,0	./.:0:.,.	0/0:34:34,0	0/0:15:15,0	0/0:14:14,0	0/0:12:12,0	./.:0:.,.	0/0:12:12,0	0/0:17:17,0	./.:0:.,.	./.:0:.,.	0/0:16:16,0	./.:0:.,.	0/0:13:13,0	./.:0:.,.	0/0:19:19,0	0/0:18:18,0	0/0:14:14,0	0/0:15:15,0	0/0:17:17,0	0/0:14:14,0	0/0:18:18,0	0/0:23:23,0	0/0:15:15,0	0/0:14:14,0	0/0:15:15,0	./.:0:.,.	./.:0:.,.	0/0:11:11,0	0/0:16:16,0	0/0:17:17,0	./.:0:.,.	0/1:21:15,6	0/1:11:7,4	0/1:13:6,7
MockRefGenome	128484	.	A	G	.	PASS	AC=37;AF=0.185;DP=1295;AV=16.61;NS=64	GT:DP:AD	0/1:21:10,11	0/0:68:68,0	0/0:19:19,0	0/1:53:25,28	0/0:17:17,0	0/0:20:20,0	0/0:21:20,1	./.:0:.,.	0/0:34:34,0	./.:0:.,.	0/1:14:3,11	0/0:12:12,0	./.:0:.,.	0/0:13:13,0	0/0:17:17,0	./.:0:.,.	0/1:9:5,4	0/1:16:13,3	./.:0:.,.	0/0:13:13,0	./.:0:.,.	0/0:19:19,0	0/0:18:18,0	0/0:14:14,0	0/0:15:15,0	0/0:17:17,0	0/0:14:14,0	0/0:18:18,0	0/0:23:23,0	0/0:15:15,0	0/0:14:14,0	0/0:15:15,0	./.:0:.,.	./.:0:.,.	0/0:11:11,0	0/0:16:16,0	1/1:17:0,17	./.:0:.,.	0/1:21:13,8	./.:0:.,.	0/1:13:10,3
MockRefGenome	128529	.	T	C	.	PASS	AC=32;AF=0.160;DP=1251;AV=16.61;NS=62	GT:DP:AD	0/1:20:11,9	0/0:68:68,0	0/0:19:19,0	0/1:51:28,23	0/0:17:17,0	0/0:20:20,0	0/0:20:20,0	./.:0:.,.	0/0:34:34,0	0/0:15:15,0	0/0:14:14,0	0/0:11:11,0	./.:0:.,.	0/0:13:13,0	0/0:17:17,0	./.:0:.,.	./.:0:.,.	0/0:14:14,0	./.:0:.,.	0/0:13:13,0	./.:0:.,.	0/0:19:19,0	0/0:18:18,0	0/0:13:13,0	0/0:15:15,0	0/0:16:16,0	0/0:14:14,0	0/0:17:17,0	0/0:20:20,0	0/0:12:12,0	0/0:14:14,0	0/0:14:14,0	./.:0:.,.	./.:0:.,.	0/0:11:11,0	0/0:16:16,0	0/0:17:17,0	./.:0:.,.	0/1:21:15,6	0/1:11:7,4	0/1:12:6,6
MockRefGenome	128556	.	T	C	.	PASS	AC=44;AF=0.220;DP=1236;AV=16.52;NS=61	GT:DP:AD	0/0:20:20,0	0/0:67:67,0	0/1:18:12,6	0/0:51:51,0	1/1:17:0,17	0/1:20:12,8	0/1:20:13,7	./.:0:.,.	1/1:33:0,33	0/0:15:15,0	0/0:14:14,0	1/1:11:0,11	./.:0:.,.	0/0:13:13,0	1/1:17:0,17	./.:0:.,.	./.:0:.,.	0/0:14:14,0	./.:0:.,.	0/1:12:6,6	./.:0:.,.	1/1:19:0,19	1/1:18:0,18	1/1:13:0,13	1/1:15:0,15	1/1:16:0,16	0/0:14:14,0	1/1:17:0,17	1/1:20:0,20	1/1:11:0,11	1/1:14:0,14	0/1:13:7,6	./.:0:.,.	./.:0:.,.	1/1:10:0,10	0/1:15:4,11	0/0:17:17,0	./.:0:.,.	0/0:21:21,0	0/0:11:11,0	0/0:12:12,0
MockRefGenome	128613	.	C	T	.	PASS	AC=17;AF=0.085;DP=1145;AV=19.73;NS=44	GT:DP:AD	0/0:11:11,0	1/1:67:0,67	0/1:28:22,6	0/0:28:28,0	0/0:37:37,0	0/1:19:7,12	0/1:25:14,11	./.:0:.,.	0/0:34:34,0	./.:0:.,.	./.:0:.,.	0/0:11:11,0	./.:0:.,.	./.:0:.,.	0/0:15:15,0	./.:0:.,.	./.:0:.,.	1/1:16:0,16	./.:0:.,.	0/0:11:11,0	./.:0:.,.	0/1:17:14,3	0/0:23:23,0	0/0:21:21,0	0/1:17:11,6	0/0:17:17,0	0/0:13:13,0	0/0:38:38,0	0/0:40:40,0	0/0:33:33,0	0/1:17:11,6	0/0:24:24,0	0/0:10:10,0	./.:0:.,.	0/0:18:18,0	0/0:23:23,0	1/1:17:0,17	0/0:10:10,0	0/0:18:18,0	./.:0:.,.	0/1:6:3,3
MockRefGenome	128620	.	C	T	.	PASS	AC=18;AF=0.090;DP=1150;AV=19.72;NS=43	GT:DP:AD	1/1:11:0,11	0/0:67:67,0	0/0:28:28,0	1/1:28:0,28	0/0:37:37,0	0/0:19:19,0	0/0:25:24,1	./.:0:.,.	0/0:34:34,0	./.:0:.,.	./.:0:.,.	0/0:11:11,0	./.:0:.,.	./.:0:.,.	0/0:15:15,0	./.:0:.,.	./.:0:.,.	0/0:16:16,0	./.:0:.,.	0/0:11:11,0	./.:0:.,.	0/0:17:17,0	0/0:23:23,0	0/0:21:21,0	0/0:17:17,0	0/0:17:17,0	0/0:13:13,0	0/0:38:38,0	0/0:40:40,0	0/0:33:33,0	0/0:17:17,0	0/0:24:24,0	0/0:10:10,0	./.:0:.,.	0/0:18:18,0	0/0:23:23,0	0/0:17:17,0	0/1:10:7,3	0/1:18:10,8	./.:0:.,.	0/1:6:3,3
MockRefGenome	128637	.	C	T	.	PASS	AC=18;AF=0.090;DP=1162;AV=19.73;NS=44	GT:DP:AD	0/0:11:11,0	1/1:67:0,67	0/1:28:6,22	0/0:28:28,0	0/0:37:37,0	0/0:19:19,0	0/0:26:26,0	./.:0:.,.	0/0:34:34,0	./.:0:.,.	0/1:9:3,6	0/0:11:11,0	./.:0:.,.	./.:0:.,.	0/0:15:15,0	./.:0:.,.	0/1:9:5,4	1/1:16:0,16	./.:0:.,.	0/1:11:5,6	./.:0:.,.	0/0:17:17,0	0/0:24:24,0	0/1:21:13,8	0/0:17:17,0	0/1:17:8,9	1/1:13:0,13	0/0:38:38,0	0/0:42:42,0	0/0:33:33,0	0/0:17:17,0	0/0:24:24,0	0/0:10:10,0	./.:0:.,.	0/0:18:18,0	0/0:23:23,0	1/1:17:0,17	0/0:11:11,0	./.:0:.,.	./.:0:.,.	./.:0:.,.
MockRefGenome	128642	.	A	T	.	PASS	AC=7;AF=0.035;DP=1166;AV=20.30;NS=43	GT:DP:AD	0/0:11:11,0	0/0:67:67,0	0/1:28:22,6	0/0:28:28,0	0/0:37:37,0	0/1:19:7,12	0/1:26:14,12	./.:0:.,.	0/0:34:34,0	./.:0:.,.	./.:0:.,.	0/0:11:11,0	./.:0:.,.	./.:0:.,.	0/0:15:15,0	./.:0:.,.	./.:0:.,.	0/0:16:16,0	./.:0:.,.	0/0:12:12,0	./.:0:.,.	0/1:17:14,3	0/0:24:24,0	0/0:21:21,0	0/1:17:11,6	0/0:17:17,0	0/0:13:13,0	0/0:38:38,0	0/0:42:42,0	0/0:33:33,0	0/1:17:11,6	0/0:24:24,0	0/0:10:10,0	./.:0:.,.	0/0:18:18,0	0/0:23:23,0	0/0:17:17,0	0/0:11:11,0	0/0:19:19,0	./.:0:.,.	0/1:7:4,3
MockRefGenome	128663	.	G	A	.	PASS	AC=18;AF=0.090;DP=1182;AV=19.77;NS=44	GT:DP:AD	1/1:11:0,11	0/0:67:67,0	0/0:28:28,0	1/1:28:0,28	0/0:37:37,0	0/0:19:19,0	0/0:26:25,1	./.:0:.,.	0/0:34:34,0	./.:0:.,.	0/1:9:6,3	0/0:12:12,0	./.:0:.,.	./.:0:.,.	0/0:16:16,0	./.:0:.,.	0/1:9:4,5	0/0:16:16,0	./.:0:.,.	0/0:12:12,0	./.:0:.,.	0/0:17:17,0	0/0:24:24,0	0/0:21:21,0	0/0:17:17,0	0/0:17:17,0	0/0:13:13,0	0/0:39:39,0	0/0:42:42,0	0/0:33:33,0	0/0:17:17,0	0/0:24:24,0	0/0:10:10,0	./.:0:.,.	0/0:18:18,0	0/0:23:23,0	0/0:17:17,0	0/1:11:8,3	0/1:19:11,8	./.:0:.,.	0/1:7:4,3
MockRefGenome	129467	.	C	T	.	PASS	AC=33;AF=0.165;DP=836;AV=15.21;NS=39	GT:DP:AD	./.:0:.,.	0/1:36:14,22	0/1:26:13,13	1/1:29:0,29	0/1:9:3,6	0/0:20:20,0	0/0:13:13,0	1/1:10:0,10	0/0:48:48,0	1/1:10:0,10	1/1:11:0,11	./.:0:.,.	1/1:22:0,22	0/1:18:3,15	0/0:24:24,0	./.:0:.,.	0/1:12:6,6	0/1:11:8,3	./.:0:.,.	0/0:13:13,0	./.:0:.,.	0/0:18:18,0	0/0:15:15,0	./.:0:.,.	0/0:10:10,0	./.:0:.,.	./.:0:.,.	0/0:20:20,0	./.:0:.,.	0/0:14:14,0	0/0:11:11,0	0/0:14:14,0	./.:0:.,.	./.:0:.,.	1/1:12:0,12	0/1:8:4,4	0/1:18:6,12	./.:0:.,.	0/1:7:3,4	0/1:17:12,5	./.:0:.,.
MockRefGenome	129485	.	A	G	.	PASS	AC=24;AF=0.120;DP=823;AV=15.38;NS=37	GT:DP:AD	./.:0:.,.	0/1:36:15,21	0/0:25:25,0	0/0:29:29,0	./.:0:.,.	0/0:19:19,0	0/1:13:5,8	0/1:10:7,3	0/0:48:48,0	0/0:10:10,0	0/1:11:7,4	./.:0:.,.	0/1:21:18,3	1/1:18:0,18	0/1:23:9,14	./.:0:.,.	0/1:12:5,7	0/1:11:4,7	./.:0:.,.	0/1:13:6,7	./.:0:.,.	0/1:18:12,6	0/0:14:14,0	./.:0:.,.	0/1:10:6,4	./.:0:.,.	./.:0:.,.	0/1:20:7,13	0/0:15:15,0	0/0:14:14,0	0/0:11:11,0	0/0:14:14,0	./.:0:.,.	./.:0:.,.	0/0:11:11,0	./.:0:.,.	0/1:17:5,12	./.:0:.,.	./.:0:.,.	0/1:16:4,12	./.:0:.,.
MockRefGenome	129488	.	T	C	.	PASS	AC=11;AF=0.055;DP=819;AV=15.85;NS=34	GT:DP:AD	./.:0:.,.	0/1:36:21,15	0/0:25:25,0	0/0:29:29,0	./.:0:.,.	0/0:19:19,0	0/0:13:13,0	0/1:10:3,7	0/0:48:48,0	1/1:10:0,10	0/1:11:4,7	./.:0:.,.	0/1:21:3,18	0/0:18:18,0	0/0:23:23,0	./.:0:.,.	0/0:12:12,0	0/0:11:11,0	./.:0:.,.	0/0:13:13,0	./.:0:.,.	0/0:18:18,0	0/0:14:14,0	./.:0:.,.	0/0:10:10,0	./.:0:.,.	./.:0:.,.	0/0:20:20,0	0/0:15:15,0	0/0:14:14,0	0/0:10:10,0	0/0:14:14,0	./.:0:.,.	./.:0:.,.	0/0:11:11,0	./.:0:.,.	0/1:16:11,5	./.:0:.,.	./.:0:.,.	0/0:16:16,0	./.:0:.,.
MockRefGenome	129497	.	A	G	.	PASS	AC=11;AF=0.055;DP=814;AV=16.24;NS=34	GT:DP:AD	./.:0:.,.	0/0:36:36,0	0/0:25:25,0	0/0:29:29,0	./.:0:.,.	0/0:19:19,0	0/1:13:5,8	0/0:10:10,0	0/0:48:48,0	0/0:10:10,0	0/0:11:11,0	./.:0:.,.	0/0:21:21,0	0/0:18:18,0	0/1:23:9,14	./.:0:.,.	0/1:11:6,5	0/1:10:7,3	./.:0:.,.	0/1:13:6,7	./.:0:.,.	0/1:18:12,6	0/1:14:11,3	./.:0:.,.	0/0:10:10,0	./.:0:.,.	./.:0:.,.	0/1:19:7,12	0/0:15:15,0	0/0:14:14,0	0/0:10:10,0	0/0:14:14,0	./.:0:.,.	./.:0:.,.	0/0:11:11,0	./.:0:.,.	0/0:16:16,0	./.:0:.,.	./.:0:.,.	0/1:16:4,12	./.:0:.,.
MockRefGenome	129506	.	A	G	.	PASS	AC=8;AF=0.040;DP=812;AV=16.77;NS=30	GT:DP:AD	./.:0:.,.	0/0:35:35,0	0/0:25:25,0	0/0:29:29,0	0/1:9:6,3	0/0:19:19,0	0/1:13:8,5	0/0:10:10,0	0/1:48:24,24	0/0:10:10,0	0/0:11:11,0	./.:0:.,.	0/0:21:21,0	0/0:18:18,0	0/1:22:13,9	./.:0:.,.	0/0:12:12,0	0/0:10:10,0	./.:0:.,.	0/1:13:7,6	./.:0:.,.	0/0:18:18,0	0/0:14:14,0	./.:0:.,.	0/1:10:6,4	./.:0:.,.	./.:0:.,.	0/0:19:19,0	./.:0:.,.	1/1:14:0,14	0/0:10:10,0	0/0:14:14,0	./.:0:.,.	./.:0:.,.	./.:0:.,.	./.:0:.,.	0/0:15:15,0	./.:0:.,.	./.:0:.,.	0/0:16:16,0	./.:0:.,.
MockRefGenome	129555	.	G	C	.	PASS	AC=25;AF=0.125;DP=781;AV=15.90;NS=31	GT:DP:AD	./.:0:.,.	0/0:34:34,0	0/1:25:13,12	1/1:29:0,29	0/1:9:6,3	0/1:19:9,10	0/1:12:7,5	0/0:10:10,0	1/1:44:0,44	0/0:10:10,0	0/0:11:11,0	./.:0:.,.	0/0:20:20,0	0/0:18:18,0	0/1:20:12,8	./.:0:.,.	0/0:11:11,0	0/0:10:10,0	./.:0:.,.	1/1:12:0,12	./.:0:.,.	0/1:17:6,11	0/1:14:3,11	./.:0:.,.	0/1:10:4,6	./.:0:.,.	./.:0:.,.	0/0:18:18,0	./.:0:.,.	1/1:14:0,14	./.:0:.,.	1/1:13:0,13	./.:0:.,.	./.:0:.,.	./.:0:.,.	0/1:8:4,4	0/0:13:13,0	./.:0:.,.	./.:0:.,.	0/1:16:12,4	./.:0:.,.
MockRefGenome	129621	.	C	T	.	PASS	AC=4;AF=0.020;DP=537;AV=13.82;NS=22	GT:DP:AD	./.:0:.,.	./.:0:.,.	0/0:13:13,0	0/0:29:29,0	./.:0:.,.	./.:0:.,.	./.:0:.,.	0/1:10:7,3	0/0:24:24,0	0/0:10:10,0	./.:0:.,.	./.:0:.,.	./.:0:.,.	0/0:10:10,0	0/0:22:22,0	./.:0:.,.	./.:0:.,.	0/1:7:3,4	./.:0:.,.	0/0:12:12,0	./.:0:.,.	0/0:12:12,0	./.:0:.,.	./.:0:.,.	0/0:10:10,0	./.:0:.,.	./.:0:.,.	0/0:11:11,0	0/0:14:14,0	0/0:14:14,0	./.:0:.,.	0/0:12:12,0	./.:0:.,.	./.:0:.,.	0/0:12:12,0	./.:0:.,.	./.:0:.,.	./.:0:.,.	./.:0:.,.	0/0:15:15,0	./.:0:.,.
MockRefGenome	129623	.	T	G	.	PASS	AC=8;AF=0.040;DP=539;AV=13.65;NS=23	GT:DP:AD	./.:0:.,.	./.:0:.,.	0/0:13:13,0	0/0:29:29,0	./.:0:.,.	./.:0:.,.	./.:0:.,.	0/1:10:7,3	0/0:24:24,0	0/0:10:10,0	./.:0:.,.	./.:0:.,.	./.:0:.,.	0/0:10:10,0	0/0:22:22,0	./.:0:.,.	./.:0:.,.	0/1:7:3,4	./.:0:.,.	0/1:12:5,7	./.:0:.,.	0/1:12:6,6	./.:0:.,.	./.:0:.,.	0/1:10:4,6	./.:0:.,.	./.:0:.,.	0/0:11:11,0	0/0:14:14,0	0/0:14:14,0	./.:0:.,.	0/0:13:13,0	./.:0:.,.	./.:0:.,.	0/0:12:12,0	0/1:8:4,4	./.:0:.,.	./.:0:.,.	./.:0:.,.	0/0:16:16,0	./.:0:.,.
MockRefGenome	129671	.	G	A	.	PASS	AC=5;AF=0.025;DP=573;AV=14.45;NS=22	GT:DP:AD	./.:0:.,.	./.:0:.,.	0/0:14:14,0	0/0:29:29,0	./.:0:.,.	./.:0:.,.	./.:0:.,.	./.:0:.,.	0/0:26:26,0	0/0:10:10,0	./.:0:.,.	./.:0:.,.	./.:0:.,.	0/0:10:10,0	0/0:23:23,0	./.:0:.,.	0/1:12:5,7	./.:0:.,.	./.:0:.,.	0/0:13:13,0	./.:0:.,.	0/0:12:12,0	./.:0:.,.	./.:0:.,.	0/0:10:10,0	./.:0:.,.	./.:0:.,.	0/0:12:12,0	0/1:15:7,8	0/1:14:7,7	./.:0:.,.	0/0:13:13,0	./.:0:.,.	./.:0:.,.	0/0:12:12,0	./.:0:.,.	./.:0:.,.	./.:0:.,.	./.:0:.,.	0/0:16:16,0	./.:0:.,.
MockRefGenome	129680	.	G	A	.	PASS	AC=4;AF=0.020;DP=579;AV=14.48;NS=21	GT:DP:AD	./.:0:.,.	./.:0:.,.	0/0:14:14,0	0/0:29:29,0	./.:0:.,.	./.:0:.,.	./.:0:.,.	0/0:10:10,0	0/0:27:27,0	0/0:10:10,0	./.:0:.,.	./.:0:.,.	./.:0:.,.	0/0:10:10,0	0/1:25:14,11	./.:0:.,.	0/0:12:12,0	./.:0:.,.	./.:0:.,.	0/1:13:7,6	./.:0:.,.	0/0:12:12,0	./.:0:.,.	./.:0:.,.	0/1:10:6,4	./.:0:.,.	./.:0:.,.	0/0:12:12,0	./.:0:.,.	0/0:14:14,0	./.:0:.,.	0/0:13:13,0	./.:0:.,.	./.:0:.,.	./.:0:.,.	0/1:8:4,4	0/0:10:10,0	./.:0:.,.	./.:0:.,.	0/0:16:16,0	./.:0:.,.
MockRefGenome	129686	.	G	A	.	PASS	AC=3;AF=0.015;DP=581;AV=14.26;NS=23	GT:DP:AD	./.:0:.,.	./.:0:.,.	./.:0:.,.	0/0:29:29,0	./.:0:.,.	./.:0:.,.	./.:0:.,.	0/0:10:10,0	0/0:27:27,0	0/0:10:10,0	./.:0:.,.	./.:0:.,.	./.:0:.,.	0/1:10:7,3	0/0:25:25,0	./.:0:.,.	0/0:12:12,0	./.:0:.,.	./.:0:.,.	0/0:13:13,0	./.:0:.,.	0/1:12:6,6	./.:0:.,.	./.:0:.,.	0/0:10:10,0	./.:0:.,.	./.:0:.,.	0/0:12:12,0	0/0:15:15,0	0/0:14:14,0	./.:0:.,.	0/0:13:13,0	./.:0:.,.	./.:0:.,.	0/0:12:12,0	0/1:8:4,4	0/0:10:10,0	./.:0:.,.	./.:0:.,.	0/0:16:16,0	./.:0:.,.
MockRefGenome	129689	.	G	A	.	PASS	AC=3;AF=0.015;DP=582;AV=14.41;NS=22	GT:DP:AD	./.:0:.,.	./.:0:.,.	./.:0:.,.	0/0:29:29,0	./.:0:.,.	./.:0:.,.	./.:0:.,.	0/0:10:10,0	0/0:27:27,0	0/0:10:10,0	./.:0:.,.	./.:0:.,.	./.:0:.,.	0/1:10:7,3	0/0:25:25,0	./.:0:.,.	0/0:12:12,0	./.:0:.,.	./.:0:.,.	0/0:13:13,0	./.:0:.,.	0/1:12:6,6	./.:0:.,.	./.:0:.,.	0/0:10:10,0	./.:0:.,.	./.:0:.,.	0/0:12:12,0	0/0:15:15,0	0/0:14:14,0	./.:0:.,.	0/0:13:13,0	./.:0:.,.	./.:0:.,.	0/0:12:12,0	0/1:8:4,4	0/0:10:10,0	./.:0:.,.	./.:0:.,.	0/0:16:16,0	./.:0:.,.
MockRefGenome	130436	.	C	T	.	PASS	AC=9;AF=0.045;DP=743;AV=15.13;NS=30	GT:DP:AD	./.:0:.,.	0/0:18:18,0	0/0:19:19,0	0/0:36:36,0	./.:0:.,.	./.:0:.,.	0/0:13:13,0	./.:0:.,.	1/1:13:0,13	0/0:10:10,0	./.:0:.,.	./.:0:.,.	./.:0:.,.	./.:0:.,.	1/1:14:0,14	./.:0:.,.	./.:0:.,.	./.:0:.,.	./.:0:.,.	./.:0:.,.	1/1:13:0,13	0/1:13:3,10	./.:0:.,.	0/0:21:21,0	0/0:16:16,0	./.:0:.,.	0/0:19:19,0	0/0:20:20,0	./.:0:.,.	1/1:11:0,11	0/0:21:21,0	./.:0:.,.	./.:0:.,.	./.:0:.,.	./.:0:.,.	./.:0:.,.	./.:0:.,.	./.:0:.,.	0/0:15:15,0	0/0:10:10,0	0/0:14:14,0
MockRefGenome	130460	.	C	T	.	PASS	AC=10;AF=0.050;DP=743;AV=14.90;NS=31	GT:DP:AD	./.:0:.,.	0/0:18:18,0	0/0:19:19,0	0/0:36:36,0	./.:0:.,.	./.:0:.,.	0/0:13:13,0	./.:0:.,.	1/1:13:0,13	0/0:10:10,0	./.:0:.,.	./.:0:.,.	./.:0:.,.	./.:0:.,.	0/1:14:8,6	./.:0:.,.	./.:0:.,.	./.:0:.,.	./.:0:.,.	./.:0:.,.	1/1:13:0,13	0/1:13:3,10	./.:0:.,.	0/0:21:21,0	0/0:16:16,0	./.:0:.,.	./.:0:.,.	0/0:20:20,0	./.:0:.,.	1/1:11:0,11	0/0:21:21,0	./.:0:.,.	./.:0:.,.	./.:0:.,.	1/1:13:0,13	./.:0:.,.	./.:0:.,.	./.:0:.,.	0/0:15:15,0	0/0:10:10,0	0/0:14:14,0
MockRefGenome	130463	.	C	T	.	PASS	AC=22;AF=0.110;DP=743;AV=14.90;NS=30	GT:DP:AD	./.:0:.,.	0/0:18:18,0	1/1:19:0,19	0/0:36:36,0	./.:0:.,.	./.:0:.,.	1/1:13:0,13	./.:0:.,.	0/0:13:13,0	0/0:10:10,0	./.:0:.,.	./.:0:.,.	./.:0:.,.	./.:0:.,.	0/1:14:6,8	./.:0:.,.	./.:0:.,.	./.:0:.,.	./.:0:.,.	./.:0:.,.	0/0:13:13,0	0/1:13:10,3	./.:0:.,.	1/1:21:0,21	1/1:16:0,16	./.:0:.,.	1/1:19:0,19	./.:0:.,.	./.:0:.,.	0/0:11:11,0	1/1:21:0,21	./.:0:.,.	./.:0:.,.	./.:0:.,.	0/0:13:13,0	./.:0:.,.	./.:0:.,.	./.:0:.,.	0/1:15:6,9	0/0:10:10,0	0/1:14:9,5
MockRefGenome	130503	.	A	C	.	PASS	AC=4;AF=0.020;DP=731;AV=14.97;NS=31	GT:DP:AD	./.:0:.,.	0/0:18:18,0	0/0:19:19,0	0/0:36:36,0	./.:0:.,.	./.:0:.,.	0/0:13:13,0	./.:0:.,.	0/0:13:13,0	0/0:10:10,0	./.:0:.,.	./.:0:.,.	./.:0:.,.	./.:0:.,.	0/0:13:13,0	./.:0:.,.	./.:0:.,.	./.:0:.,.	0/1:9:5,4	./.:0:.,.	1/1:13:0,13	0/1:13:10,3	./.:0:.,.	0/0:21:21,0	0/0:16:16,0	./.:0:.,.	0/0:18:18,0	0/0:20:20,0	./.:0:.,.	0/0:11:11,0	0/0:21:21,0	./.:0:.,.	./.:0:.,.	./.:0:.,.	0/0:12:12,0	./.:0:.,.	./.:0:.,.	./.:0:.,.	0/0:15:15,0	0/0:10:10,0	0/0:14:14,0
MockRefGenome	130520	.	G	A	.	PASS	AC=5;AF=0.025;DP=729;AV=15.17;NS=30	GT:DP:AD	./.:0:.,.	0/0:18:18,0	0/0:19:19,0	0/0:36:36,0	./.:0:.,.	./.:0:.,.	0/0:13:13,0	./.:0:.,.	1/1:13:0,13	0/0:10:10,0	./.:0:.,.	./.:0:.,.	./.:0:.,.	./.:0:.,.	0/1:13:7,6	./.:0:.,.	./.:0:.,.	./.:0:.,.	0/1:9:4,5	./.:0:.,.	0/0:13:13,0	0/1:13:6,7	./.:0:.,.	0/0:21:21,0	0/0:16:16,0	./.:0:.,.	0/0:19:19,0	0/0:20:20,0	./.:0:.,.	0/0:11:11,0	0/0:21:21,0	./.:0:.,.	./.:0:.,.	./.:0:.,.	0/0:12:12,0	./.:0:.,.	./.:0:.,.	./.:0:.,.	0/0:15:15,0	./.:0:.,.	0/0:14:14,0
MockRefGenome	130553	.	C	T	.	PASS	AC=4;AF=0.020;DP=715;AV=14.97;NS=30	GT:DP:AD	./.:0:.,.	0/0:18:18,0	0/0:18:18,0	0/0:36:36,0	./.:0:.,.	./.:0:.,.	0/0:13:13,0	./.:0:.,.	0/0:13:13,0	0/0:10:10,0	./.:0:.,.	./.:0:.,.	./.:0:.,.	./.:0:.,.	0/0:13:13,0	./.:0:.,.	./.:0:.,.	./.:0:.,.	0/1:9:5,4	./.:0:.,.	1/1:13:0,13	0/1:12:9,3	./.:0:.,.	0/0:21:21,0	0/0:16:16,0	./.:0:.,.	0/0:19:19,0	0/0:20:20,0	./.:0:.,.	0/0:11:11,0	0/0:20:20,0	./.:0:.,.	./.:0:.,.	./.:0:.,.	0/0:12:12,0	./.:0:.,.	./.:0:.,.	./.:0:.,.	0/0:14:14,0	./.:0:.,.	0/0:14:14,0
MockRefGenome	130562	.	C	A	.	PASS	AC=18;AF=0.090;DP=547;AV=14.72;NS=25	GT:DP:AD	./.:0:.,.	0/0:17:17,0	0/0:18:18,0	1/1:36:0,36	./.:0:.,.	./.:0:.,.	0/0:13:13,0	./.:0:.,.	0/0:13:13,0	./.:0:.,.	./.:0:.,.	./.:0:.,.	./.:0:.,.	./.:0:.,.	0/0:12:12,0	./.:0:.,.	./.:0:.,.	./.:0:.,.	./.:0:.,.	./.:0:.,.	./.:0:.,.	./.:0:.,.	./.:0:.,.	0/0:21:21,0	0/0:15:15,0	./.:0:.,.	./.:0:.,.	0/0:20:20,0	./.:0:.,.	0/0:11:11,0	0/0:20:20,0	./.:0:.,.	./.:0:.,.	./.:0:.,.	./.:0:.,.	./.:0:.,.	./.:0:.,.	./.:0:.,.	0/1:14:8,6	./.:0:.,.	0/1:14:5,9
MockRefGenome	130614	.	T	G	.	PASS	AC=18;AF=0.090;DP=571;AV=15.05;NS=21	GT:DP:AD	./.:0:.,.	1/1:16:16,0	0/0:16:0,16	1/1:34:34,0	./.:0:.,.	./.:0:.,.	0/0:12:0,12	./.:0:.,.	./.:0:.,.	./.:0:.,.	./.:0:.,.	./.:0:.,.	./.:0:.,.	./.:0:.,.	./.:0:.,.	./.:0:.,.	./.:0:.,.	./.:0:.,.	./.:0:.,.	./.:0:.,.	./.:0:.,.	./.:0:.,.	./.:0:.,.	./.:0:.,.	0/0:16:0,16	./.:0:.,.	0/0:19:0,19	0/0:18:0,18	./.:0:.,.	0/0:10:0,10	0/0:19:0,19	./.:0:.,.	./.:0:.,.	./.:0:.,.	0/0:10:0,10	./.:0:.,.	./.:0:.,.	./.:0:.,.	1/0:15:6,9	1/1:10:10,0	1/0:14:9,5
MockRefGenome	130829	.	G	A	.	PASS	AC=6;AF=0.030;DP=576;AV=19.88;NS=24	GT:DP:AD	0/0:19:19,0	./.:0:.,.	./.:0:.,.	0/0:87:87,0	./.:0:.,.	./.:0:.,.	./.:0:.,.	./.:0:.,.	./.:0:.,.	./.:0:.,.	./.:0:.,.	./.:0:.,.	./.:0:.,.	./.:0:.,.	./.:0:.,.	./.:0:.,.	./.:0:.,.	./.:0:.,.	./.:0:.,.	./.:0:.,.	./.:0:.,.	./.:0:.,.	./.:0:.,.	./.:0:.,.	./.:0:.,.	./.:0:.,.	./.:0:.,.	./.:0:.,.	./.:0:.,.	./.:0:.,.	./.:0:.,.	./.:0:.,.	./.:0:.,.	./.:0:.,.	./.:0:.,.	./.:0:.,.	./.:0:.,.	./.:0:.,.	./.:0:.,.	./.:0:.,.	0/1:15:7,8
MockRefGenome	131447	.	A	G	.	PASS	AC=22;AF=0.110;DP=926;AV=35.50;NS=26	GT:DP:AD	1/1:36:0,36	./.:0:.,.	./.:0:.,.	./.:0:.,.	./.:0:.,.	./.:0:.,.	./.:0:.,.	./.:0:.,.	0/0:135:134,1	./.:0:.,.	./.:0:.,.	./.:0:.,.	./.:0:.,.	./.:0:.,.	./.:0:.,.	./.:0:.,.	./.:0:.,.	./.:0:.,.	0/0:27:27,0	./.:0:.,.	./.:0:.,.	./.:0:.,.	./.:0:.,.	./.:0:.,.	./.:0:.,.	./.:0:.,.	./.:0:.,.	./.:0:.,.	./.:0:.,.	./.:0:.,.	./.:0:.,.	./.:0:.,.	./.:0:.,.	./.:0:.,.	./.:0:.,.	./.:0:.,.	./.:0:.,.	./.:0:.,.	./.:0:.,.	./.:0:.,.	0/0:24:24,0
MockRefGenome	131781	.	G	A	.	PASS	AC=16;AF=0.080;DP=1455;AV=17.93;NS=71	GT:DP:AD	0/0:32:32,0	0/0:75:75,0	./.:0:.,.	0/0:52:52,0	0/0:16:16,0	0/0:12:12,0	0/0:20:20,0	./.:0:.,.	0/0:42:42,0	0/1:14:9,5	0/0:16:16,0	0/0:18:18,0	0/0:10:10,0	0/1:16:10,6	0/0:18:18,0	./.:0:.,.	0/0:14:14,0	0/0:17:17,0	./.:0:.,.	0/0:16:16,0	0/0:15:15,0	./.:0:.,.	0/0:11:11,0	0/0:15:15,0	0/0:13:13,0	0/0:19:19,0	0/0:18:18,0	0/0:20:20,0	0/0:20:20,0	./.:0:.,.	0/0:12:12,0	0/0:18:18,0	0/0:16:16,0	0/0:26:26,0	0/0:16:16,0	0/0:14:14,0	0/0:12:12,0	0/1:13:4,9	0/1:19:13,6	0/1:34:19,15	0/1:17:12,5
MockRefGenome	131811	.	C	A	.	PASS	AC=11;AF=0.055;DP=1448;AV=17.92;NS=71	GT:DP:AD	0/0:32:32,0	0/0:75:75,0	./.:0:.,.	0/0:52:52,0	0/0:16:16,0	0/1:11:4,7	0/1:20:8,12	./.:0:.,.	0/0:42:42,0	0/0:14:14,0	0/0:16:16,0	0/0:18:18,0	0/0:10:10,0	0/0:16:16,0	0/0:18:18,0	./.:0:.,.	0/0:14:14,0	0/0:17:17,0	./.:0:.,.	0/0:16:16,0	0/0:15:15,0	./.:0:.,.	0/0:11:11,0	1/1:15:0,15	0/1:13:4,9	0/0:19:19,0	0/0:18:18,0	0/0:20:20,0	0/0:20:20,0	./.:0:.,.	0/1:12:6,6	0/0:18:18,0	0/0:16:16,0	0/0:26:26,0	0/0:16:16,0	0/0:14:14,0	0/0:12:12,0	./.:0:.,.	0/0:19:19,0	0/0:34:34,0	0/1:17:9,8
MockRefGenome	131835	.	C	T	.	PASS	AC=29;AF=0.145;DP=1439;AV=18.11;NS=65	GT:DP:AD	0/1:32:22,10	0/0:75:75,0	./.:0:.,.	0/1:52:18,34	0/0:16:16,0	0/0:11:11,0	0/0:20:20,0	./.:0:.,.	0/0:42:42,0	0/0:14:14,0	0/0:16:16,0	0/0:18:18,0	0/0:10:10,0	0/0:15:15,0	0/0:18:18,0	./.:0:.,.	0/0:14:14,0	./.:0:.,.	./.:0:.,.	0/0:16:16,0	0/0:15:15,0	./.:0:.,.	0/0:11:11,0	0/0:15:15,0	0/0:13:13,0	0/0:19:19,0	0/0:18:18,0	0/0:18:18,0	0/0:20:20,0	./.:0:.,.	0/0:12:12,0	0/0:18:18,0	0/0:16:16,0	0/0:26:26,0	0/0:16:16,0	0/0:13:13,0	0/0:12:12,0	0/1:13:10,3	0/1:19:16,3	0/1:33:29,4	0/1:17:13,4
MockRefGenome	131925	.	A	G	.	PASS	AC=44;AF=0.220;DP=1291;AV=16.24;NS=68	GT:DP:AD	0/0:29:28,1	0/0:68:68,0	./.:0:.,.	0/0:49:49,0	1/1:13:0,13	0/0:10:10,0	1/1:18:0,18	./.:0:.,.	0/1:41:20,21	0/0:12:12,0	0/0:12:12,0	1/1:17:0,17	0/0:10:10,0	0/0:13:13,0	0/1:15:8,7	./.:0:.,.	0/0:13:13,0	0/0:11:11,0	./.:0:.,.	0/0:12:12,0	./.:0:.,.	./.:0:.,.	0/0:11:11,0	0/0:11:11,0	0/1:11:7,4	1/1:17:0,17	1/1:15:0,15	1/1:18:0,18	1/1:17:0,17	./.:0:.,.	0/1:10:4,6	1/1:17:0,17	0/1:12:9,3	0/0:22:22,0	1/1:14:0,14	1/1:11:0,11	0/0:10:10,0	0/1:12:4,8	0/1:18:13,5	0/1:28:4,24	0/1:14:9,5
MockRefGenome	131938	.	G	A	.	PASS	AC=30;AF=0.150;DP=1305;AV=16.58;NS=64	GT:DP:AD	0/1:29:20,9	0/0:70:70,0	./.:0:.,.	0/1:50:16,34	0/0:13:13,0	0/0:10:10,0	0/0:18:18,0	./.:0:.,.	0/0:41:41,0	0/0:12:12,0	0/0:12:12,0	0/0:17:17,0	0/0:10:10,0	0/0:13:13,0	0/0:17:17,0	./.:0:.,.	0/0:13:13,0	0/0:11:11,0	./.:0:.,.	0/0:12:12,0	0/0:14:14,0	./.:0:.,.	0/0:11:11,0	0/0:12:12,0	0/0:11:11,0	0/0:17:17,0	0/0:15:15,0	0/0:18:18,0	0/0:17:17,0	./.:0:.,.	0/0:10:10,0	0/0:17:17,0	0/0:13:13,0	0/0:23:23,0	0/0:14:14,0	0/0:11:11,0	0/0:10:10,0	0/1:12:9,3	0/1:18:15,3	0/1:29:25,4	0/1:13:9,4
MockRefGenome	131995	.	T	C	.	PASS	AC=10;AF=0.050;DP=1368;AV=17.13;NS=69	GT:DP:AD	0/0:31:31,0	0/0:72:72,0	./.:0:.,.	0/0:51:51,0	0/0:16:16,0	0/1:12:8,4	0/0:19:19,0	./.:0:.,.	0/0:41:41,0	0/0:13:13,0	0/0:13:13,0	0/0:17:17,0	0/0:10:10,0	0/0:13:13,0	0/1:18:8,10	./.:0:.,.	0/0:13:13,0	0/0:12:12,0	./.:0:.,.	1/1:13:0,13	./.:0:.,.	./.:0:.,.	1/1:11:0,11	0/0:12:12,0	0/0:13:13,0	0/0:18:18,0	0/0:17:17,0	0/0:20:20,0	0/0:17:17,0	./.:0:.,.	0/0:10:10,0	0/0:18:18,0	0/0:14:14,0	0/0:24:24,0	0/0:14:14,0	0/0:12:12,0	0/0:10:10,0	0/0:13:13,0	0/0:18:18,0	0/0:32:32,0	0/0:14:14,0
MockRefGenome	132004	.	T	C	.	PASS	AC=28;AF=0.140;DP=1378;AV=16.85;NS=71	GT:DP:AD	0/0:31:31,0	1/1:73:1,72	./.:0:.,.	0/0:51:51,0	0/0:16:16,0	0/0:12:12,0	0/1:19:9,10	./.:0:.,.	0/0:41:41,0	0/1:13:4,9	0/1:13:10,3	0/0:17:17,0	1/1:10:0,10	1/1:14:0,14	0/0:18:18,0	./.:0:.,.	0/1:13:6,7	./.:0:.,.	./.:0:.,.	0/0:13:13,0	0/0:14:14,0	./.:0:.,.	0/0:11:11,0	0/0:12:12,0	0/1:13:9,4	0/0:18:18,0	0/1:17:7,10	0/1:20:10,10	0/0:17:17,0	./.:0:.,.	0/0:10:10,0	0/0:18:18,0	0/0:14:14,0	0/0:24:24,0	0/1:15:12,3	0/0:12:12,0	1/1:10:0,10	0/0:13:13,0	0/0:18:18,0	0/1:33:19,14	0/0:14:14,0
MockRefGenome	132037	.	C	T	.	PASS	AC=21;AF=0.105;DP=1457;AV=17.69;NS=74	GT:DP:AD	0/0:32:32,0	1/1:74:0,74	./.:0:.,.	0/0:52:52,0	0/0:16:16,0	0/0:12:12,0	0/0:20:20,0	./.:0:.,.	0/0:42:42,0	0/1:14:9,5	0/1:16:11,5	0/0:18:18,0	1/1:10:0,10	0/1:14:6,8	0/0:18:18,0	0/1:9:3,6	0/1:14:7,7	0/1:15:10,5	./.:0:.,.	0/0:16:16,0	0/0:15:15,0	./.:0:.,.	0/0:11:11,0	0/0:15:15,0	0/0:13:13,0	0/0:19:19,0	0/0:18:18,0	0/0:20:20,0	0/0:20:20,0	./.:0:.,.	0/0:12:12,0	0/0:18:18,0	0/0:16:16,0	0/0:26:26,0	0/0:16:16,0	0/0:14:14,0	1/1:12:0,12	0/0:13:13,0	0/0:19:19,0	0/0:34:34,0	0/0:17:17,0
MockRefGenome	132052	.	G	A	.	PASS	AC=29;AF=0.145;DP=1457;AV=18.16;NS=67	GT:DP:AD	0/1:32:22,10	0/0:74:74,0	./.:0:.,.	0/1:52:18,34	0/0:16:16,0	0/0:12:12,0	0/0:20:20,0	./.:0:.,.	0/0:42:42,0	0/0:14:14,0	0/0:16:16,0	0/0:18:18,0	0/0:10:10,0	0/0:14:14,0	0/0:18:18,0	./.:0:.,.	0/0:14:14,0	0/0:15:15,0	./.:0:.,.	0/0:16:16,0	0/0:15:15,0	./.:0:.,.	0/0:11:11,0	0/0:15:15,0	0/0:13:13,0	0/0:19:19,0	0/0:18:18,0	0/0:20:20,0	0/0:20:20,0	./.:0:.,.	0/0:12:12,0	0/0:18:18,0	0/0:16:16,0	0/0:26:26,0	0/0:16:16,0	0/0:14:14,0	0/0:12:12,0	0/1:13:10,3	0/1:19:16,3	0/1:34:30,4	0/1:17:13,4
MockRefGenome	132058	.	C	T	.	PASS	AC=12;AF=0.060;DP=1453;AV=17.75;NS=73	GT:DP:AD	0/0:32:32,0	0/1:73:64,9	./.:0:.,.	0/0:52:52,0	0/0:16:16,0	0/0:12:12,0	0/0:20:20,0	./.:0:.,.	0/1:42:22,20	0/0:14:14,0	0/0:16:16,0	0/0:18:18,0	0/1:10:4,6	0/0:14:14,0	0/0:18:18,0	0/1:9:6,3	0/1:14:7,7	0/1:15:10,5	./.:0:.,.	0/0:16:16,0	0/0:15:15,0	./.:0:.,.	0/0:11:11,0	0/0:15:15,0	0/0:13:13,0	0/0:19:19,0	0/0:18:18,0	0/0:20:20,0	0/0:20:20,0	./.:0:.,.	0/1:11:5,6	0/0:17:17,0	0/0:16:16,0	0/0:26:26,0	0/0:16:16,0	0/0:14:14,0	0/1:12:7,5	0/0:13:13,0	0/1:19:9,10	0/0:34:34,0	0/0:17:17,0
MockRefGenome	132413	.	G	A	.	PASS	AC=4;AF=0.020;DP=688;AV=14.83;NS=24	GT:DP:AD	./.:0:.,.	0/0:30:30,0	0/0:14:14,0	0/0:35:35,0	0/0:10:10,0	0/0:14:14,0	0/1:11:7,4	./.:0:.,.	./.:0:.,.	./.:0:.,.	./.:0:.,.	0/0:15:15,0	./.:0:.,.	./.:0:.,.	0/1:16:11,5	./.:0:.,.	./.:0:.,.	./.:0:.,.	./.:0:.,.	0/0:11:11,0	0/0:11:11,0	./.:0:.,.	0/0:14:14,0	0/0:15:15,0	0/1:15:7,8	0/0:10:10,0	./.:0:.,.	0/0:25:25,0	./.:0:.,.	./.:0:.,.	0/0:10:10,0	./.:0:.,.	0/0:12:12,0	0/0:18:18,0	./.:0:.,.	./.:0:.,.	0/0:13:13,0	./.:0:.,.	./.:0:.,.	./.:0:.,.	./.:0:.,.
MockRefGenome	132470	.	A	G	.	PASS	AC=8;AF=0.040;DP=693;AV=14.88;NS=25	GT:DP:AD	./.:0:.,.	0/0:30:30,0	0/0:13:13,0	0/0:36:36,0	0/0:10:10,0	0/0:14:14,0	1/1:10:0,10	./.:0:.,.	0/0:21:20,1	./.:0:.,.	./.:0:.,.	0/0:15:15,0	./.:0:.,.	./.:0:.,.	0/1:16:11,5	./.:0:.,.	./.:0:.,.	./.:0:.,.	./.:0:.,.	0/0:11:11,0	0/1:11:6,5	./.:0:.,.	0/1:14:9,5	0/0:14:14,0	0/1:16:6,10	0/0:10:10,0	0/1:8:5,3	0/0:25:25,0	./.:0:.,.	./.:0:.,.	0/0:10:10,0	./.:0:.,.	0/0:12:12,0	0/0:18:18,0	./.:0:.,.	./.:0:.,.	0/0:13:13,0	./.:0:.,.	./.:0:.,.	./.:0:.,.	./.:0:.,.
MockRefGenome	132512	.	A	T	.	PASS	AC=25;AF=0.125;DP=669;AV=14.43;NS=23	GT:DP:AD	./.:0:.,.	0/0:30:30,0	1/1:13:0,13	0/0:36:36,0	0/0:10:10,0	1/1:13:0,13	./.:0:.,.	./.:0:.,.	./.:0:.,.	./.:0:.,.	./.:0:.,.	1/1:14:0,14	./.:0:.,.	./.:0:.,.	0/1:15:5,10	./.:0:.,.	./.:0:.,.	./.:0:.,.	./.:0:.,.	1/1:11:0,11	0/1:10:5,5	./.:0:.,.	0/1:13:5,8	1/1:14:0,14	0/1:14:9,5	./.:0:.,.	./.:0:.,.	1/1:24:0,24	./.:0:.,.	./.:0:.,.	1/1:10:0,10	./.:0:.,.	1/1:11:0,11	1/1:17:0,17	./.:0:.,.	./.:0:.,.	0/0:13:13,0	./.:0:.,.	./.:0:.,.	./.:0:.,.	./.:0:.,.
MockRefGenome	132618	.	C	G	.	PASS	AC=14;AF=0.070;DP=649;AV=14.17;NS=23	GT:DP:AD	./.:0:.,.	0/1:30:11,19	0/0:13:13,0	1/1:36:0,36	0/0:10:10,0	0/0:13:13,0	./.:0:.,.	./.:0:.,.	0/0:22:22,0	./.:0:.,.	./.:0:.,.	0/0:14:14,0	./.:0:.,.	./.:0:.,.	0/0:13:13,0	./.:0:.,.	./.:0:.,.	./.:0:.,.	./.:0:.,.	0/0:10:10,0	./.:0:.,.	./.:0:.,.	0/0:11:11,0	0/0:14:14,0	0/0:15:15,0	./.:0:.,.	./.:0:.,.	0/0:23:23,0	./.:0:.,.	./.:0:.,.	./.:0:.,.	0/1:8:4,4	0/0:11:11,0	0/0:16:16,0	./.:0:.,.	./.:0:.,.	1/1:13:0,13	./.:0:.,.	./.:0:.,.	./.:0:.,.	./.:0:.,.
MockRefGenome	132642	.	G	A	.	PASS	AC=16;AF=0.080;DP=668;AV=14.87;NS=23	GT:DP:AD	./.:0:.,.	1/1:30:30,0	0/0:14:0,14	1/1:36:36,0	1/1:10:10,0	0/0:14:0,14	./.:0:.,.	./.:0:.,.	0/0:22:0,22	./.:0:.,.	./.:0:.,.	0/0:15:0,15	./.:0:.,.	./.:0:.,.	0/0:14:0,14	./.:0:.,.	./.:0:.,.	./.:0:.,.	./.:0:.,.	0/0:11:0,11	0/0:11:0,11	./.:0:.,.	0/0:13:0,13	0/0:15:0,15	0/0:16:0,16	./.:0:.,.	./.:0:.,.	0/0:23:0,23	./.:0:.,.	./.:0:.,.	./.:0:.,.	./.:0:.,.	0/0:12:0,12	0/0:18:0,18	./.:0:.,.	./.:0:.,.	1/1:13:13,0	./.:0:.,.	./.:0:.,.	./.:0:.,.	./.:0:.,.
MockRefGenome	132697	.	T	C	.	PASS	AC=6;AF=0.030;DP=706;AV=15.15;NS=26	GT:DP:AD	./.:0:.,.	0/0:30:30,0	0/0:14:14,0	0/0:36:36,0	0/0:10:10,0	0/0:14:14,0	0/0:12:12,0	./.:0:.,.	0/0:22:22,0	./.:0:.,.	./.:0:.,.	0/0:15:15,0	./.:0:.,.	./.:0:.,.	0/0:16:16,0	./.:0:.,.	./.:0:.,.	./.:0:.,.	./.:0:.,.	1/1:11:0,11	0/1:11:5,6	./.:0:.,.	0/0:15:15,0	0/0:15:15,0	0/1:17:11,6	0/0:10:10,0	./.:0:.,.	0/1:25:11,14	./.:0:.,.	./.:0:.,.	0/0:10:10,0	./.:0:.,.	0/0:12:12,0	0/0:20:20,0	./.:0:.,.	./.:0:.,.	0/0:13:13,0	./.:0:.,.	./.:0:.,.	./.:0:.,.	./.:0:.,.
MockRefGenome	133096	.	A	G	.	PASS	AC=6;AF=0.030;DP=761;AV=13.66;NS=32	GT:DP:AD	0/0:13:13,0	0/0:34:34,0	0/0:10:10,0	0/0:20:20,0	0/0:13:13,0	0/0:11:11,0	0/0:12:12,0	./.:0:.,.	0/0:16:16,0	0/0:10:10,0	0/0:13:13,0	0/0:18:18,0	0/0:16:16,0	0/0:12:12,0	0/0:14:14,0	0/0:11:11,0	0/0:16:16,0	./.:0:.,.	0/1:10:5,5	./.:0:.,.	0/1:15:6,9	./.:0:.,.	./.:0:.,.	./.:0:.,.	0/1:10:3,7	0/0:12:12,0	./.:0:.,.	0/1:10:6,4	./.:0:.,.	./.:0:.,.	0/0:14:14,0	0/0:19:19,0	./.:0:.,.	./.:0:.,.	./.:0:.,.	0/0:13:13,0	./.:0:.,.	0/1:7:3,4	./.:0:.,.	./.:0:.,.	./.:0:.,.
MockRefGenome	133151	.	T	C	.	PASS	AC=28;AF=0.140;DP=743;AV=13.10;NS=30	GT:DP:AD	0/0:13:13,0	0/0:34:34,0	1/1:10:0,10	0/0:20:20,0	0/0:13:13,0	1/1:10:0,10	./.:0:.,.	./.:0:.,.	1/1:16:0,16	0/0:10:10,0	0/0:12:12,0	1/1:17:0,17	./.:0:.,.	0/0:12:12,0	1/1:14:0,14	0/0:11:11,0	0/0:15:15,0	./.:0:.,.	1/1:10:0,10	./.:0:.,.	1/1:15:0,15	./.:0:.,.	./.:0:.,.	./.:0:.,.	1/1:10:0,10	1/1:11:0,11	./.:0:.,.	1/1:10:0,10	./.:0:.,.	./.:0:.,.	1/1:14:0,14	0/0:19:19,0	./.:0:.,.	./.:0:.,.	./.:0:.,.	0/0:12:12,0	./.:0:.,.	0/1:7:3,4	./.:0:.,.	./.:0:.,.	./.:0:.,.
MockRefGenome	133155	.	C	T	.	PASS	AC=6;AF=0.030;DP=742;AV=13.48;NS=31	GT:DP:AD	0/0:13:13,0	0/0:34:34,0	0/0:10:10,0	0/0:20:20,0	1/1:13:0,13	0/0:10:10,0	0/0:12:12,0	./.:0:.,.	0/0:16:16,0	0/0:10:10,0	0/0:12:12,0	0/1:17:10,7	0/0:14:14,0	0/0:12:12,0	0/0:14:14,0	0/0:11:11,0	0/0:15:15,0	./.:0:.,.	0/0:10:10,0	./.:0:.,.	0/0:15:15,0	./.:0:.,.	./.:0:.,.	./.:0:.,.	0/0:10:10,0	0/1:11:6,5	./.:0:.,.	0/0:10:10,0	./.:0:.,.	./.:0:.,.	0/0:14:14,0	0/0:19:19,0	./.:0:.,.	./.:0:.,.	./.:0:.,.	1/1:12:0,12	./.:0:.,.	./.:0:.,.	./.:0:.,.	./.:0:.,.	./.:0:.,.
MockRefGenome	133175	.	G	C	.	PASS	AC=16;AF=0.080;DP=728;AV=13.62;NS=24	GT:DP:AD	1/1:13:0,13	0/1:33:13,20	0/0:10:10,0	1/1:19:0,19	0/0:13:13,0	./.:0:.,.	./.:0:.,.	./.:0:.,.	0/0:16:16,0	1/1:10:0,10	./.:0:.,.	0/0:17:17,0	./.:0:.,.	./.:0:.,.	0/0:14:14,0	0/1:11:8,3	1/1:14:0,14	./.:0:.,.	./.:0:.,.	./.:0:.,.	0/0:15:15,0	./.:0:.,.	./.:0:.,.	./.:0:.,.	0/0:10:10,0	0/0:11:11,0	./.:0:.,.	0/0:10:10,0	./.:0:.,.	./.:0:.,.	0/0:14:14,0	0/1:19:8,11	./.:0:.,.	./.:0:.,.	./.:0:.,.	0/0:12:12,0	./.:0:.,.	./.:0:.,.	./.:0:.,.	./.:0:.,.	./.:0:.,.
MockRefGenome	133239	.	C	T	.	PASS	AC=5;AF=0.025;DP=697;AV=13.04;NS=28	GT:DP:AD	0/0:13:13,0	0/1:29:19,10	0/0:10:10,0	0/0:18:18,0	0/0:11:11,0	0/0:11:11,0	0/0:12:12,0	./.:0:.,.	0/0:16:16,0	0/0:10:10,0	0/0:11:11,0	0/0:17:17,0	0/0:13:13,0	./.:0:.,.	0/0:14:14,0	0/1:11:7,4	0/0:12:12,0	./.:0:.,.	0/0:10:10,0	./.:0:.,.	0/0:15:15,0	./.:0:.,.	./.:0:.,.	./.:0:.,.	0/0:10:10,0	0/0:11:11,0	./.:0:.,.	0/0:10:10,0	./.:0:.,.	./.:0:.,.	0/0:14:14,0	0/0:15:15,0	./.:0:.,.	./.:0:.,.	./.:0:.,.	0/0:11:11,0	./.:0:.,.	./.:0:.,.	./.:0:.,.	./.:0:.,.	./.:0:.,.
MockRefGenome	133281	.	T	A	.	PASS	AC=22;AF=0.110;DP=752;AV=12.61;NS=33	GT:DP:AD	0/0:13:13,0	0/0:34:34,0	1/1:10:0,10	0/0:20:20,0	0/0:12:12,0	1/1:11:0,11	0/0:12:12,0	./.:0:.,.	./.:0:.,.	0/0:10:10,0	0/0:12:12,0	1/1:17:0,17	./.:0:.,.	0/0:11:11,0	0/1:14:7,7	0/0:11:11,0	0/0:15:15,0	./.:0:.,.	1/1:10:0,10	./.:0:.,.	0/1:15:6,9	0/1:6:3,3	0/1:8:3,5	./.:0:.,.	0/1:10:3,7	1/1:11:0,11	0/1:8:5,3	1/1:10:0,10	./.:0:.,.	./.:0:.,.	1/1:14:0,14	0/0:16:16,0	./.:0:.,.	./.:0:.,.	./.:0:.,.	0/0:11:11,0	./.:0:.,.	0/1:7:3,4	./.:0:.,.	./.:0:.,.	./.:0:.,.
MockRefGenome	133323	.	T	C	.	PASS	AC=10;AF=0.050;DP=773;AV=13.00;NS=32	GT:DP:AD	0/0:13:13,0	0/0:34:34,0	0/0:10:10,0	0/0:20:20,0	0/0:12:12,0	0/0:11:11,0	./.:0:.,.	./.:0:.,.	./.:0:.,.	0/0:10:10,0	0/0:13:13,0	0/0:18:18,0	0/0:16:16,0	0/0:12:12,0	0/1:14:7,7	0/0:11:11,0	0/0:15:15,0	./.:0:.,.	0/0:10:10,0	./.:0:.,.	0/1:15:9,6	0/1:6:3,3	0/1:8:5,3	./.:0:.,.	0/1:10:7,3	0/0:11:11,0	0/1:8:3,5	0/0:10:10,0	./.:0:.,.	./.:0:.,.	0/0:14:14,0	0/0:18:18,0	./.:0:.,.	./.:0:.,.	./.:0:.,.	0/0:13:13,0	./.:0:.,.	./.:0:.,.	./.:0:.,.	./.:0:.,.	./.:0:.,.
MockRefGenome	133380	.	C	T	.	PASS	AC=8;AF=0.040;DP=776;AV=13.37;NS=30	GT:DP:AD	0/0:13:13,0	0/0:34:34,0	0/0:10:10,0	0/0:20:20,0	0/0:13:13,0	0/0:11:11,0	0/1:12:4,8	./.:0:.,.	./.:0:.,.	0/0:10:10,0	0/0:13:13,0	0/0:18:18,0	0/0:16:16,0	0/0:12:12,0	0/1:14:7,7	0/0:11:11,0	0/0:16:16,0	./.:0:.,.	0/0:10:10,0	./.:0:.,.	0/0:15:15,0	0/1:6:3,3	./.:0:.,.	./.:0:.,.	0/1:10:7,3	0/0:12:12,0	0/1:8:3,5	./.:0:.,.	./.:0:.,.	./.:0:.,.	0/0:14:14,0	0/0:19:19,0	./.:0:.,.	./.:0:.,.	./.:0:.,.	./.:0:.,.	./.:0:.,.	./.:0:.,.	./.:0:.,.	./.:0:.,.	./.:0:.,.
MockRefGenome	134193	.	A	G	.	PASS	AC=16;AF=0.080;DP=893;AV=16.82;NS=38	GT:DP:AD	0/0:21:21,0	./.:0:.,.	1/1:19:0,19	0/0:54:54,0	1/1:13:0,13	./.:0:.,.	./.:0:.,.	./.:0:.,.	1/1:23:0,23	./.:0:.,.	0/0:23:23,0	1/1:12:0,12	./.:0:.,.	./.:0:.,.	1/1:23:0,23	./.:0:.,.	./.:0:.,.	./.:0:.,.	./.:0:.,.	./.:0:.,.	./.:0:.,.	./.:0:.,.	./.:0:.,.	./.:0:.,.	0/0:12:12,0	./.:0:.,.	./.:0:.,.	1/1:13:0,13	0/0:14:14,0	0/0:20:20,0	0/1:25:13,12	0/0:25:25,0	0/0:19:19,0	0/0:10:10,0	0/1:22:11,11	0/0:18:18,0	./.:0:.,.	0/0:13:13,0	0/0:20:20,0	0/0:14:14,0	./.:0:.,.
MockRefGenome	134237	.	G	A	.	PASS	AC=42;AF=0.210;DP=1260;AV=20.16;NS=55	GT:DP:AD	0/1:56:34,22	./.:0:.,.	0/1:19:13,6	0/1:97:44,53	0/0:13:13,0	./.:0:.,.	./.:0:.,.	./.:0:.,.	0/0:26:26,0	0/1:7:4,3	1/1:21:0,21	0/0:12:12,0	./.:0:.,.	./.:0:.,.	0/0:23:23,0	./.:0:.,.	./.:0:.,.	./.:0:.,.	./.:0:.,.	./.:0:.,.	./.:0:.,.	./.:0:.,.	./.:0:.,.	0/0:10:10,0	0/0:11:11,0	./.:0:.,.	./.:0:.,.	1/1:13:0,13	0/0:11:11,0	0/0:21:21,0	0/1:24:12,12	0/0:22:22,0	0/0:19:19,0	./.:0:.,.	0/0:20:20,0	0/0:13:13,0	./.:0:.,.	0/1:17:14,3	0/1:27:19,8	0/1:25:11,14	0/1:15:9,6
MockRefGenome	134246	.	G	A	.	PASS	AC=36;AF=0.180;DP=1271;AV=20.62;NS=53	GT:DP:AD	0/1:56:22,34	./.:0:.,.	0/0:20:20,0	0/1:97:53,44	0/0:13:13,0	./.:0:.,.	./.:0:.,.	./.:0:.,.	0/0:26:26,0	./.:0:.,.	0/0:22:22,0	0/0:12:12,0	./.:0:.,.	./.:0:.,.	0/0:23:23,0	./.:0:.,.	./.:0:.,.	./.:0:.,.	./.:0:.,.	./.:0:.,.	./.:0:.,.	./.:0:.,.	./.:0:.,.	./.:0:.,.	0/0:11:11,0	./.:0:.,.	./.:0:.,.	0/0:13:13,0	0/0:11:11,0	0/0:21:21,0	0/0:24:24,0	0/0:23:23,0	./.:0:.,.	./.:0:.,.	0/0:20:20,0	0/0:13:13,0	./.:0:.,.	0/1:17:11,6	0/1:28:18,10	0/1:25:14,11	0/1:15:6,9
MockRefGenome	134294	.	G	A	.	PASS	AC=17;AF=0.085;DP=1333;AV=22.02;NS=52	GT:DP:AD	0/0:57:57,0	./.:0:.,.	0/0:20:20,0	0/0:100:100,0	0/0:13:13,0	./.:0:.,.	./.:0:.,.	./.:0:.,.	0/0:27:27,0	./.:0:.,.	0/0:22:22,0	./.:0:.,.	./.:0:.,.	./.:0:.,.	0/0:23:23,0	./.:0:.,.	./.:0:.,.	./.:0:.,.	./.:0:.,.	./.:0:.,.	./.:0:.,.	./.:0:.,.	./.:0:.,.	0/0:10:10,0	1/1:12:0,12	./.:0:.,.	./.:0:.,.	0/0:14:14,0	1/1:12:0,12	1/1:22:0,22	0/1:25:12,13	1/1:26:0,26	0/1:20:9,11	./.:0:.,.	0/1:21:10,11	1/1:16:0,16	./.:0:.,.	0/1:18:10,8	0/1:30:19,11	0/0:25:25,0	0/0:15:15,0
MockRefGenome	134318	.	G	A	.	PASS	AC=39;AF=0.195;DP=1361;AV=21.23;NS=57	GT:DP:AD	0/1:58:36,22	./.:0:.,.	0/0:20:20,0	0/1:101:48,53	0/0:13:13,0	./.:0:.,.	./.:0:.,.	./.:0:.,.	0/0:28:27,1	0/1:8:5,3	1/1:22:0,22	./.:0:.,.	./.:0:.,.	./.:0:.,.	0/0:23:23,0	./.:0:.,.	./.:0:.,.	./.:0:.,.	./.:0:.,.	./.:0:.,.	./.:0:.,.	./.:0:.,.	./.:0:.,.	0/0:10:10,0	0/0:12:12,0	./.:0:.,.	./.:0:.,.	0/0:14:14,0	0/0:14:14,0	0/0:22:22,0	0/0:25:25,0	0/0:26:26,0	0/0:21:21,0	0/0:10:10,0	0/0:22:22,0	0/0:18:18,0	./.:0:.,.	0/1:18:14,4	0/1:30:21,9	0/1:26:11,15	0/1:17:10,7
MockRefGenome	134357	.	G	A	.	PASS	AC=11;AF=0.055;DP=1396;AV=22.20;NS=56	GT:DP:AD	0/0:60:60,0	./.:0:.,.	0/1:20:6,14	0/0:103:103,0	1/1:13:0,13	./.:0:.,.	./.:0:.,.	./.:0:.,.	0/0:28:28,0	./.:0:.,.	0/0:23:23,0	0/0:14:14,0	./.:0:.,.	./.:0:.,.	1/1:23:0,23	./.:0:.,.	./.:0:.,.	./.:0:.,.	./.:0:.,.	./.:0:.,.	./.:0:.,.	./.:0:.,.	./.:0:.,.	./.:0:.,.	0/0:12:12,0	./.:0:.,.	./.:0:.,.	0/0:14:14,0	0/0:14:14,0	0/0:22:22,0	0/0:27:27,0	0/0:26:26,0	0/1:21:13,8	1/1:11:0,11	0/1:22:11,11	0/0:19:19,0	./.:0:.,.	0/0:19:19,0	0/0:30:30,0	0/0:27:27,0	0/0:18:18,0
MockRefGenome	135068	.	A	G	.	PASS	AC=14;AF=0.070;DP=608;AV=14.14;NS=29	GT:DP:AD	./.:0:.,.	1/1:14:0,14	0/0:20:20,0	./.:0:.,.	./.:0:.,.	0/0:17:17,0	0/0:22:22,0	./.:0:.,.	0/0:24:24,0	./.:0:.,.	./.:0:.,.	0/0:18:18,0	1/1:11:0,11	./.:0:.,.	./.:0:.,.	0/1:9:3,6	1/1:12:0,12	./.:0:.,.	0/0:11:11,0	0/0:16:16,0	0/0:14:14,0	./.:0:.,.	./.:0:.,.	0/0:19:19,0	0/0:17:17,0	0/0:14:14,0	0/0:10:10,0	0/0:13:13,0	./.:0:.,.	./.:0:.,.	0/0:12:12,0	./.:0:.,.	0/0:16:16,0	0/0:20:20,0	./.:0:.,.	./.:0:.,.	./.:0:.,.	./.:0:.,.	./.:0:.,.	./.:0:.,.	./.:0:.,.
MockRefGenome	135100	.	C	A	.	PASS	AC=12;AF=0.060;DP=588;AV=14.46;NS=26	GT:DP:AD	./.:0:.,.	1/1:14:0,14	0/0:19:19,0	./.:0:.,.	./.:0:.,.	0/0:16:16,0	0/0:22:22,0	./.:0:.,.	0/0:24:24,0	./.:0:.,.	./.:0:.,.	0/0:18:18,0	1/1:11:0,11	./.:0:.,.	./.:0:.,.	./.:0:.,.	1/1:11:0,11	./.:0:.,.	0/0:10:10,0	0/0:16:16,0	0/0:14:14,0	./.:0:.,.	./.:0:.,.	0/0:19:19,0	0/0:17:17,0	0/0:13:13,0	0/0:10:10,0	0/0:13:13,0	./.:0:.,.	./.:0:.,.	0/0:10:10,0	./.:0:.,.	0/0:16:16,0	0/0:19:19,0	./.:0:.,.	./.:0:.,.	./.:0:.,.	./.:0:.,.	./.:0:.,.	./.:0:.,.	./.:0:.,.
MockRefGenome	135154	.	A	G	.	PASS	AC=29;AF=0.145;DP=538;AV=13.46;NS=24	GT:DP:AD	./.:0:.,.	0/0:14:14,0	0/0:18:18,0	./.:0:.,.	./.:0:.,.	1/1:14:0,14	1/1:19:0,19	./.:0:.,.	1/1:23:0,23	./.:0:.,.	./.:0:.,.	1/1:16:0,16	0/0:11:11,0	./.:0:.,.	./.:0:.,.	./.:0:.,.	0/0:11:11,0	./.:0:.,.	1/1:10:0,10	1/1:12:0,12	1/1:11:0,11	0/1:8:5,3	./.:0:.,.	1/1:16:0,16	0/1:17:10,7	1/1:12:0,12	./.:0:.,.	0/0:12:12,0	./.:0:.,.	./.:0:.,.	./.:0:.,.	./.:0:.,.	0/1:15:8,7	0/1:19:4,15	./.:0:.,.	./.:0:.,.	./.:0:.,.	./.:0:.,.	./.:0:.,.	./.:0:.,.	./.:0:.,.
MockRefGenome	135228	.	G	A	.	PASS	AC=12;AF=0.060;DP=543;AV=13.25;NS=24	GT:DP:AD	./.:0:.,.	1/1:26:0,26	0/0:18:18,0	./.:0:.,.	./.:0:.,.	0/0:15:15,0	./.:0:.,.	./.:0:.,.	0/0:20:20,0	./.:0:.,.	./.:0:.,.	0/0:14:14,0	1/1:11:0,11	./.:0:.,.	./.:0:.,.	./.:0:.,.	1/1:12:0,12	./.:0:.,.	0/0:10:10,0	0/0:11:11,0	0/0:10:10,0	./.:0:.,.	./.:0:.,.	0/0:12:12,0	0/0:14:14,0	0/0:12:12,0	0/0:10:10,0	0/0:13:13,0	./.:0:.,.	./.:0:.,.	0/0:11:11,0	./.:0:.,.	0/0:14:14,0	0/0:19:19,0	./.:0:.,.	./.:0:.,.	./.:0:.,.	./.:0:.,.	./.:0:.,.	./.:0:.,.	./.:0:.,.
MockRefGenome	135237	.	T	C	.	PASS	AC=15;AF=0.075;DP=576;AV=13.59;NS=27	GT:DP:AD	./.:0:.,.	0/0:26:26,0	0/0:20:20,0	./.:0:.,.	./.:0:.,.	0/1:16:7,9	0/1:15:7,8	./.:0:.,.	0/0:22:22,0	./.:0:.,.	./.:0:.,.	0/0:16:16,0	0/0:11:11,0	./.:0:.,.	./.:0:.,.	0/0:10:10,0	0/0:12:12,0	./.:0:.,.	0/1:11:4,7	0/1:13:6,7	0/0:12:12,0	./.:0:.,.	./.:0:.,.	0/1:14:8,6	1/1:14:0,14	0/1:13:6,7	0/0:10:10,0	1/1:13:0,13	./.:0:.,.	./.:0:.,.	0/0:12:12,0	./.:0:.,.	0/0:14:14,0	0/0:19:19,0	./.:0:.,.	./.:0:.,.	./.:0:.,.	./.:0:.,.	./.:0:.,.	./.:0:.,.	./.:0:.,.
MockRefGenome	135304	.	A	G	.	PASS	AC=43;AF=0.215;DP=617;AV=14.28;NS=29	GT:DP:AD	./.:0:.,.	0/0:26:0,26	1/1:20:20,0	./.:0:.,.	./.:0:.,.	1/1:17:17,0	1/1:21:21,0	./.:0:.,.	1/1:24:24,0	./.:0:.,.	./.:0:.,.	1/1:18:18,0	0/0:11:0,11	./.:0:.,.	./.:0:.,.	0/0:10:0,10	0/0:12:0,12	./.:0:.,.	1/1:11:11,0	1/1:14:14,0	1/1:14:14,0	./.:0:.,.	./.:0:.,.	1/1:16:16,0	1/1:17:17,0	1/1:14:14,0	1/1:10:10,0	1/1:13:13,0	./.:0:.,.	./.:0:.,.	1/1:12:12,0	./.:0:.,.	1/1:15:15,0	1/1:19:19,0	./.:0:.,.	./.:0:.,.	./.:0:.,.	./.:0:.,.	./.:0:.,.	./.:0:.,.	./.:0:.,.
MockRefGenome	135363	.	T	C	.	PASS	AC=13;AF=0.065;DP=632;AV=14.48;NS=29	GT:DP:AD	./.:0:.,.	1/1:26:1,25	0/0:20:20,0	./.:0:.,.	./.:0:.,.	0/0:17:17,0	0/0:22:22,0	./.:0:.,.	0/0:24:24,0	./.:0:.,.	./.:0:.,.	0/0:18:18,0	1/1:11:0,11	./.:0:.,.	./.:0:.,.	./.:0:.,.	1/1:12:0,12	./.:0:.,.	0/0:11:11,0	0/0:16:16,0	0/0:14:14,0	./.:0:.,.	./.:0:.,.	0/0:19:19,0	0/0:17:17,0	0/0:14:14,0	0/0:10:10,0	0/0:13:13,0	./.:0:.,.	./.:0:.,.	0/0:12:12,0	./.:0:.,.	0/0:16:16,0	0/0:20:20,0	./.:0:.,.	./.:0:.,.	./.:0:.,.	./.:0:.,.	./.:0:.,.	./.:0:.,.	./.:0:.,.
MockRefGenome	135410	.	C	T	.	PASS	AC=14;AF=0.070;DP=1086;AV=16.35;NS=52	GT:DP:AD	0/0:22:22,0	0/0:59:59,0	0/0:29:29,0	0/0:37:37,0	./.:0:.,.	0/1:20:11,9	0/1:20:12,8	./.:0:.,.	0/1:26:18,8	./.:0:.,.	0/0:32:32,0	0/0:10:10,0	0/0:14:14,0	0/0:26:26,0	0/0:22:22,0	0/0:14:14,0	0/0:18:18,0	0/0:10:10,0	./.:0:.,.	0/0:17:17,0	0/0:14:14,0	0/1:17:3,14	0/1:18:11,7	0/1:15:8,7	0/1:10:4,6	0/1:11:4,7	0/0:13:13,0	0/1:19:9,10	0/0:11:11,0	./.:0:.,.	0/0:16:16,0	./.:0:.,.	./.:0:.,.	0/0:10:10,0	./.:0:.,.	./.:0:.,.	./.:0:.,.	0/1:13:7,6	0/1:8:4,4	0/0:14:14,0	./.:0:.,.
MockRefGenome	135413	.	T	C	.	PASS	AC=13;AF=0.065;DP=1085;AV=16.35;NS=52	GT:DP:AD	0/0:22:22,0	0/0:59:59,0	0/0:29:29,0	0/0:37:37,0	./.:0:.,.	0/1:20:11,9	0/1:20:12,8	./.:0:.,.	0/1:26:18,8	./.:0:.,.	0/0:32:32,0	0/0:10:10,0	0/0:14:14,0	0/0:26:26,0	0/0:22:22,0	0/0:14:14,0	0/0:18:18,0	0/0:10:10,0	./.:0:.,.	0/0:17:17,0	0/0:14:14,0	0/1:17:3,14	0/1:18:11,7	0/1:15:8,7	0/1:10:4,6	0/0:11:11,0	0/0:13:13,0	0/1:19:9,10	0/0:11:11,0	./.:0:.,.	0/0:16:16,0	./.:0:.,.	./.:0:.,.	0/0:10:10,0	./.:0:.,.	./.:0:.,.	./.:0:.,.	0/1:13:7,6	0/1:8:4,4	0/0:14:14,0	./.:0:.,.
MockRefGenome	135499	.	C	G	.	PASS	AC=25;AF=0.125;DP=1039;AV=16.33;NS=46	GT:DP:AD	1/1:22:0,22	0/0:59:59,0	0/0:28:28,0	1/1:37:0,37	./.:0:.,.	0/0:19:19,0	0/0:20:20,0	./.:0:.,.	0/0:25:25,0	./.:0:.,.	0/0:31:31,0	./.:0:.,.	0/0:12:12,0	0/0:25:25,0	0/0:21:21,0	0/0:13:13,0	0/0:18:18,0	0/0:10:10,0	./.:0:.,.	0/0:16:16,0	0/0:12:12,0	0/0:16:16,0	0/0:16:16,0	0/0:13:13,0	./.:0:.,.	./.:0:.,.	0/0:13:13,0	0/0:18:18,0	0/0:11:11,0	./.:0:.,.	0/0:14:14,0	./.:0:.,.	./.:0:.,.	1/1:10:0,10	./.:0:.,.	./.:0:.,.	./.:0:.,.	0/1:12:6,6	0/1:7:4,3	0/1:14:8,6	./.:0:.,.
MockRefGenome	135503	.	A	G	.	PASS	AC=23;AF=0.115;DP=1037;AV=16.42;NS=45	GT:DP:AD	1/1:22:0,22	0/0:59:59,0	0/0:28:28,0	1/1:37:0,37	./.:0:.,.	0/0:19:19,0	0/0:19:19,0	./.:0:.,.	0/0:25:25,0	./.:0:.,.	0/0:30:30,0	./.:0:.,.	0/0:12:12,0	0/0:25:25,0	0/0:21:21,0	0/0:13:13,0	0/0:18:18,0	0/0:10:10,0	./.:0:.,.	0/0:16:16,0	0/0:12:12,0	0/0:16:16,0	0/0:16:16,0	0/0:13:13,0	./.:0:.,.	./.:0:.,.	0/0:13:13,0	0/0:18:18,0	0/0:11:11,0	./.:0:.,.	0/0:14:14,0	./.:0:.,.	./.:0:.,.	./.:0:.,.	./.:0:.,.	./.:0:.,.	./.:0:.,.	0/1:12:6,6	0/1:7:4,3	0/1:14:8,6	./.:0:.,.
MockRefGenome	135561	.	A	G	.	PASS	AC=46;AF=0.230;DP=895;AV=14.29;NS=42	GT:DP:AD	0/0:20:0,20	1/1:54:54,0	1/1:24:24,0	0/0:30:0,30	./.:0:.,.	1/1:15:15,0	1/0:15:5,10	1/0:7:4,3	1/1:21:21,0	./.:0:.,.	1/1:26:26,0	./.:0:.,.	./.:0:.,.	1/1:21:21,0	1/0:15:7,8	1/1:14:14,0	1/0:15:8,7	1/0:8:3,5	1/0:7:3,4	1/0:14:5,9	1/1:10:10,0	1/1:15:15,0	1/0:15:6,9	1/1:11:11,0	1/0:8:5,3	0/0:10:0,10	1/0:9:5,4	1/0:15:8,7	./.:0:.,.	./.:0:.,.	./.:0:.,.	./.:0:.,.	./.:0:.,.	./.:0:.,.	./.:0:.,.	./.:0:.,.	./.:0:.,.	1/0:12:6,6	1/0:7:4,3	0/0:14:0,14	./.:0:.,.
MockRefGenome	135597	.	G	A	.	PASS	AC=12;AF=0.060;DP=975;AV=15.46;NS=46	GT:DP:AD	0/0:21:21,0	0/0:58:58,0	0/0:25:25,0	0/0:33:33,0	./.:0:.,.	0/0:17:17,0	0/1:16:6,10	./.:0:.,.	0/0:22:22,0	./.:0:.,.	0/0:28:28,0	0/1:10:5,5	0/0:13:13,0	0/0:22:22,0	0/1:17:8,9	0/0:16:16,0	0/0:15:15,0	./.:0:.,.	./.:0:.,.	0/1:15:6,9	0/0:11:11,0	0/0:15:15,0	0/1:18:9,9	0/0:12:12,0	0/1:9:6,3	./.:0:.,.	0/1:10:5,5	0/1:16:9,7	0/0:10:10,0	./.:0:.,.	0/1:11:4,7	./.:0:.,.	./.:0:.,.	0/0:10:10,0	./.:0:.,.	./.:0:.,.	./.:0:.,.	0/0:12:12,0	./.:0:.,.	0/0:14:14,0	./.:0:.,.
MockRefGenome	135615	.	T	C	.	PASS	AC=10;AF=0.050;DP=1011;AV=15.57;NS=49	GT:DP:AD	0/0:21:21,0	0/0:58:58,0	0/0:26:26,0	0/0:34:34,0	./.:0:.,.	0/1:18:7,11	0/0:16:16,0	./.:0:.,.	0/0:24:24,0	./.:0:.,.	0/0:28:28,0	0/0:10:10,0	0/0:13:13,0	0/0:24:24,0	0/0:19:19,0	0/0:16:16,0	0/0:16:16,0	./.:0:.,.	0/1:7:4,3	0/1:15:9,6	0/0:12:12,0	0/1:15:10,5	0/0:19:19,0	0/0:13:13,0	0/1:9:3,6	0/0:11:11,0	0/0:13:13,0	0/0:17:17,0	0/0:10:10,0	./.:0:.,.	0/0:14:14,0	./.:0:.,.	./.:0:.,.	0/0:10:10,0	./.:0:.,.	./.:0:.,.	./.:0:.,.	0/1:12:6,6	0/1:8:3,5	0/0:14:14,0	./.:0:.,.
MockRefGenome	135654	.	C	G	.	PASS	AC=10;AF=0.050;DP=1069;AV=16.04;NS=51	GT:DP:AD	0/0:22:22,0	0/1:60:44,16	0/0:29:29,0	0/0:37:37,0	./.:0:.,.	0/0:20:20,0	0/0:18:18,0	./.:0:.,.	0/0:24:24,0	./.:0:.,.	0/0:32:31,1	0/0:10:10,0	./.:0:.,.	0/1:25:15,10	0/0:22:22,0	0/0:14:14,0	0/1:18:11,7	0/1:10:7,3	./.:0:.,.	0/0:16:16,0	0/0:13:13,0	0/0:15:15,0	0/0:19:19,0	0/0:13:13,0	0/0:10:10,0	0/0:11:11,0	0/0:13:13,0	0/0:18:18,0	0/0:11:11,0	./.:0:.,.	0/0:15:15,0	./.:0:.,.	./.:0:.,.	0/0:10:10,0	./.:0:.,.	./.:0:.,.	./.:0:.,.	0/0:12:12,0	./.:0:.,.	0/0:14:14,0	./.:0:.,.
MockRefGenome	135903	.	A	T	.	PASS	AC=6;AF=0.030;DP=751;AV=17.90;NS=29	GT:DP:AD	0/0:30:30,0	0/0:18:18,0	./.:0:.,.	0/0:74:74,0	./.:0:.,.	./.:0:.,.	./.:0:.,.	./.:0:.,.	./.:0:.,.	./.:0:.,.	./.:0:.,.	./.:0:.,.	./.:0:.,.	./.:0:.,.	./.:0:.,.	./.:0:.,.	./.:0:.,.	0/0:10:10,0	./.:0:.,.	./.:0:.,.	./.:0:.,.	./.:0:.,.	1/1:19:0,19	./.:0:.,.	./.:0:.,.	./.:0:.,.	./.:0:.,.	0/0:10:10,0	./.:0:.,.	./.:0:.,.	./.:0:.,.	0/0:18:18,0	0/1:13:5,8	0/1:12:3,9	0/0:23:23,0	./.:0:.,.	./.:0:.,.	./.:0:.,.	./.:0:.,.	0/0:16:16,0	./.:0:.,.
MockRefGenome	136447	.	G	T	.	PASS	AC=68;AF=0.340;DP=1565;AV=18.90;NS=73	GT:DP:AD	0/0:17:17,0	0/0:93:93,0	1/1:45:0,45	0/0:62:61,1	1/1:16:0,16	1/1:21:0,21	1/1:28:0,28	0/0:16:16,0	1/1:52:0,52	0/0:18:18,0	0/0:35:35,0	1/1:13:0,13	0/0:18:18,0	0/0:16:16,0	1/1:31:0,31	0/0:18:18,0	./.:0:.,.	0/0:24:24,0	1/1:10:0,10	1/1:17:0,17	1/1:13:0,13	./.:0:.,.	1/1:23:0,23	1/1:24:0,24	1/1:17:0,17	1/1:24:0,24	1/1:22:0,22	1/1:28:0,28	1/1:16:0,16	1/1:14:0,14	1/1:17:0,17	1/1:15:0,15	./.:0:.,.	./.:0:.,.	1/1:16:0,16	1/1:10:0,10	0/0:14:14,0	0/1:13:9,4	0/1:17:8,9	0/1:21:11,10	0/1:10:5,5
MockRefGenome	136558	.	C	T	.	PASS	AC=31;AF=0.155;DP=1261;AV=15.85;NS=67	GT:DP:AD	./.:0:.,.	0/0:54:54,0	0/1:22:8,14	0/0:30:30,0	1/1:14:0,14	0/1:20:11,9	0/1:23:10,13	./.:0:.,.	0/1:43:27,16	0/0:14:14,0	0/0:29:29,0	0/0:12:12,0	0/0:16:16,0	0/0:13:13,0	0/1:27:17,10	0/0:15:15,0	./.:0:.,.	0/0:18:18,0	0/0:12:12,0	0/0:15:15,0	0/1:13:4,9	1/1:14:0,14	0/0:19:19,0	0/0:18:18,0	0/1:15:5,10	0/1:20:11,9	0/1:20:11,9	0/0:23:23,0	1/1:12:0,12	1/1:13:0,13	0/1:17:5,12	1/1:14:0,14	./.:0:.,.	./.:0:.,.	1/1:15:0,15	1/1:10:0,10	0/0:14:14,0	0/0:13:13,0	0/0:13:13,0	0/0:18:18,0	./.:0:.,.
MockRefGenome	136641	.	T	C	.	PASS	AC=73;AF=0.365;DP=1566;AV=18.58;NS=77	GT:DP:AD	0/0:16:16,0	0/0:93:93,0	1/1:44:0,44	0/0:61:60,1	1/1:16:0,16	1/1:22:0,22	1/1:27:0,27	0/0:16:16,0	1/1:51:0,51	0/0:16:16,0	0/0:35:35,0	1/1:13:0,13	0/0:19:19,0	0/0:15:15,0	1/1:30:0,30	0/0:17:17,0	0/0:25:25,0	0/0:22:22,0	1/1:12:0,12	1/1:17:0,17	1/1:14:0,14	1/1:16:0,16	1/1:22:0,22	1/1:23:0,23	1/1:17:0,17	1/1:24:0,24	1/1:22:0,22	1/1:27:0,27	1/1:14:0,14	1/1:13:0,13	1/1:19:0,19	1/1:15:0,15	./.:0:.,.	./.:0:.,.	1/1:16:0,16	1/1:11:0,11	0/0:15:15,0	0/1:13:9,4	0/1:16:8,8	0/1:21:12,9	0/1:9:4,5
MockRefGenome	136652	.	G	A	.	PASS	AC=12;AF=0.060;DP=1581;AV=18.71;NS=78	GT:DP:AD	0/0:17:17,0	0/0:93:93,0	0/0:44:44,0	0/0:62:62,0	0/1:16:10,6	0/0:22:22,0	0/0:27:27,0	0/0:16:16,0	0/0:52:52,0	0/0:19:19,0	0/0:35:35,0	0/0:13:13,0	0/0:19:19,0	0/0:15:15,0	0/0:30:30,0	0/0:17:17,0	0/0:25:25,0	0/0:23:23,0	0/0:12:12,0	0/0:17:17,0	0/0:14:14,0	0/0:17:17,0	0/0:23:23,0	0/0:24:24,0	0/0:17:17,0	0/0:24:24,0	0/0:22:22,0	0/0:27:27,0	1/1:14:0,14	1/1:13:0,13	0/0:19:19,0	0/1:15:5,10	./.:0:.,.	./.:0:.,.	1/1:16:0,16	1/1:11:0,11	0/0:15:15,0	0/0:13:13,0	0/0:16:16,0	0/0:21:21,0	0/0:10:10,0
MockRefGenome	136670	.	G	A	.	PASS	AC=12;AF=0.060;DP=1596;AV=18.94;NS=77	GT:DP:AD	0/0:17:17,0	0/0:93:93,0	0/0:45:45,0	0/0:62:62,0	0/1:16:10,6	0/0:22:22,0	0/0:28:28,0	0/0:16:16,0	0/0:52:52,0	0/0:19:19,0	0/0:35:35,0	0/0:13:13,0	0/0:19:19,0	0/0:16:16,0	0/0:31:31,0	0/0:18:18,0	0/0:25:25,0	0/0:24:24,0	0/0:12:12,0	0/0:17:17,0	./.:0:.,.	0/0:17:17,0	0/0:23:23,0	0/0:24:24,0	0/0:17:17,0	0/0:24:24,0	0/0:22:22,0	0/0:28:28,0	1/1:14:0,14	1/1:13:0,13	0/0:19:19,0	0/1:15:5,10	./.:0:.,.	./.:0:.,.	1/1:16:0,16	1/1:11:0,11	0/0:15:15,0	0/0:13:13,0	0/0:17:17,0	0/0:22:22,0	0/0:10:10,0
MockRefGenome	137903	.	C	G	.	PASS	AC=5;AF=0.025;DP=878;AV=15.33;NS=39	GT:DP:AD	0/0:16:16,0	0/0:68:68,0	0/0:17:17,0	0/0:36:36,0	0/0:12:12,0	./.:0:.,.	0/0:20:20,0	0/0:10:10,0	0/1:10:5,5	0/0:12:12,0	0/0:14:14,0	0/0:10:10,0	./.:0:.,.	0/0:14:14,0	./.:0:.,.	./.:0:.,.	0/0:12:12,0	0/0:11:11,0	./.:0:.,.	./.:0:.,.	./.:0:.,.	./.:0:.,.	0/1:13:8,5	./.:0:.,.	./.:0:.,.	./.:0:.,.	0/1:10:6,4	0/1:21:11,10	0/0:10:10,0	0/0:21:21,0	./.:0:.,.	0/0:16:16,0	0/0:14:14,0	0/0:10:10,0	0/0:12:12,0	0/0:12:12,0	./.:0:.,.	0/0:10:10,0	./.:0:.,.	0/0:13:13,0	./.:0:.,.
MockRefGenome	137909	.	C	G	.	PASS	AC=12;AF=0.060;DP=877;AV=15.51;NS=35	GT:DP:AD	0/0:16:16,0	0/0:68:68,0	0/0:17:17,0	0/0:36:36,0	0/0:12:12,0	./.:0:.,.	0/1:20:7,13	./.:0:.,.	1/1:10:0,10	./.:0:.,.	0/0:14:14,0	0/0:10:10,0	./.:0:.,.	0/0:14:14,0	./.:0:.,.	./.:0:.,.	0/0:12:12,0	0/0:11:11,0	./.:0:.,.	./.:0:.,.	./.:0:.,.	0/1:8:3,5	1/1:12:0,12	./.:0:.,.	./.:0:.,.	./.:0:.,.	0/1:10:6,4	1/1:21:0,21	0/0:10:10,0	0/0:21:21,0	./.:0:.,.	0/0:16:16,0	0/1:14:9,5	./.:0:.,.	0/0:12:12,0	0/0:12:12,0	./.:0:.,.	0/0:10:10,0	./.:0:.,.	./.:0:.,.	./.:0:.,.
MockRefGenome	137930	.	C	G	.	PASS	AC=5;AF=0.025;DP=874;AV=15.45;NS=38	GT:DP:AD	0/0:15:15,0	0/0:68:68,0	0/0:17:17,0	0/0:36:36,0	0/0:12:12,0	./.:0:.,.	0/0:20:20,0	0/0:10:10,0	0/0:10:10,0	0/0:12:12,0	0/0:14:14,0	0/0:10:10,0	./.:0:.,.	0/0:14:14,0	./.:0:.,.	./.:0:.,.	0/0:12:12,0	0/0:11:11,0	./.:0:.,.	./.:0:.,.	./.:0:.,.	./.:0:.,.	0/0:13:13,0	./.:0:.,.	./.:0:.,.	./.:0:.,.	0/0:10:10,0	0/0:21:21,0	./.:0:.,.	1/1:21:0,21	./.:0:.,.	0/0:16:16,0	0/0:14:14,0	0/0:10:10,0	0/0:12:12,0	0/1:12:4,8	./.:0:.,.	0/0:10:10,0	./.:0:.,.	0/0:13:13,0	./.:0:.,.
MockRefGenome	137938	.	C	G	.	PASS	AC=29;AF=0.145;DP=840;AV=15.45;NS=31	GT:DP:AD	./.:0:.,.	1/1:51:51,0	0/0:17:0,17	1/1:36:36,0	1/0:12:6,6	./.:0:.,.	0/0:20:0,20	1/1:10:10,0	0/0:10:0,10	1/1:12:12,0	1/1:14:14,0	0/0:10:0,10	./.:0:.,.	./.:0:.,.	./.:0:.,.	./.:0:.,.	1/1:12:12,0	./.:0:.,.	./.:0:.,.	./.:0:.,.	./.:0:.,.	./.:0:.,.	0/0:13:0,13	./.:0:.,.	./.:0:.,.	./.:0:.,.	0/0:10:0,10	0/0:21:0,21	0/0:10:0,10	0/0:21:0,21	./.:0:.,.	0/0:16:0,16	0/0:14:0,14	0/0:10:0,10	./.:0:.,.	1/0:12:4,8	./.:0:.,.	1/0:10:5,5	./.:0:.,.	1/1:13:13,0	./.:0:.,.
MockRefGenome	137957	.	C	T	.	PASS	AC=12;AF=0.060;DP=857;AV=15.19;NS=36	GT:DP:AD	0/0:15:15,0	0/0:68:68,0	0/0:17:17,0	0/0:36:36,0	0/0:12:12,0	./.:0:.,.	0/1:20:7,13	./.:0:.,.	0/1:10:5,5	./.:0:.,.	0/0:14:14,0	1/1:10:0,10	./.:0:.,.	0/0:12:12,0	./.:0:.,.	./.:0:.,.	0/0:12:12,0	0/0:11:11,0	./.:0:.,.	./.:0:.,.	./.:0:.,.	./.:0:.,.	0/1:13:5,8	./.:0:.,.	0/1:6:3,3	./.:0:.,.	0/0:10:10,0	0/1:21:10,11	0/0:10:10,0	0/0:21:21,0	./.:0:.,.	0/0:16:16,0	1/1:14:0,14	./.:0:.,.	0/0:10:10,0	0/0:12:12,0	./.:0:.,.	0/1:10:5,5	./.:0:.,.	0/0:12:12,0	./.:0:.,.
MockRefGenome	137960	.	C	G	.	PASS	AC=16;AF=0.080;DP=857;AV=15.06;NS=36	GT:DP:AD	./.:0:.,.	0/0:68:68,0	1/1:17:0,17	0/0:36:36,0	0/0:12:12,0	./.:0:.,.	0/1:20:13,7	0/0:10:10,0	0/1:10:5,5	0/0:12:12,0	0/0:14:14,0	0/0:10:10,0	./.:0:.,.	0/0:12:12,0	./.:0:.,.	./.:0:.,.	0/0:12:12,0	0/0:11:11,0	./.:0:.,.	./.:0:.,.	./.:0:.,.	./.:0:.,.	0/1:13:8,5	./.:0:.,.	0/1:6:3,3	./.:0:.,.	1/1:10:0,10	0/1:21:11,10	0/0:10:10,0	0/0:21:21,0	./.:0:.,.	1/1:16:0,16	0/0:14:14,0	./.:0:.,.	./.:0:.,.	0/1:12:4,8	./.:0:.,.	0/0:10:10,0	./.:0:.,.	0/0:12:12,0	./.:0:.,.
MockRefGenome	137987	.	C	T	.	PASS	AC=5;AF=0.025;DP=828;AV=15.66;NS=32	GT:DP:AD	0/0:14:14,0	0/1:66:44,22	0/0:16:16,0	0/0:36:36,0	0/0:12:12,0	./.:0:.,.	0/0:19:19,0	0/1:10:6,4	0/0:10:10,0	./.:0:.,.	0/0:14:14,0	0/0:10:10,0	./.:0:.,.	./.:0:.,.	./.:0:.,.	./.:0:.,.	0/1:11:7,4	./.:0:.,.	./.:0:.,.	./.:0:.,.	./.:0:.,.	./.:0:.,.	0/0:13:13,0	./.:0:.,.	./.:0:.,.	./.:0:.,.	./.:0:.,.	0/0:20:20,0	./.:0:.,.	0/0:21:21,0	./.:0:.,.	0/0:16:16,0	0/0:14:14,0	./.:0:.,.	0/0:10:10,0	0/0:12:12,0	./.:0:.,.	0/0:10:10,0	./.:0:.,.	0/0:10:10,0	./.:0:.,.
MockRefGenome	138084	.	G	C	.	PASS	AC=14;AF=0.070;DP=802;AV=14.44;NS=32	GT:DP:AD	0/1:15:6,9	0/1:58:40,18	0/0:13:13,0	0/0:32:32,0	0/1:8:4,4	0/0:12:12,0	0/0:19:19,0	./.:0:.,.	./.:0:.,.	./.:0:.,.	0/1:12:9,3	0/0:10:10,0	./.:0:.,.	./.:0:.,.	./.:0:.,.	./.:0:.,.	0/1:10:3,7	0/1:9:5,4	./.:0:.,.	./.:0:.,.	./.:0:.,.	./.:0:.,.	0/1:17:4,13	./.:0:.,.	./.:0:.,.	0/0:11:11,0	./.:0:.,.	0/0:17:17,0	0/0:10:10,0	0/1:16:8,8	0/0:12:12,0	1/1:12:0,12	0/0:13:13,0	./.:0:.,.	./.:0:.,.	1/1:10:0,10	./.:0:.,.	./.:0:.,.	0/0:12:12,0	0/0:11:11,0	./.:0:.,.
MockRefGenome	138096	.	G	A	.	PASS	AC=19;AF=0.095;DP=819;AV=14.35;NS=34	GT:DP:AD	0/1:15:10,5	0/0:59:59,0	0/0:13:13,0	1/1:33:0,33	./.:0:.,.	0/0:12:12,0	0/0:19:19,0	./.:0:.,.	./.:0:.,.	./.:0:.,.	0/0:12:12,0	0/0:10:10,0	./.:0:.,.	./.:0:.,.	./.:0:.,.	./.:0:.,.	0/0:10:10,0	0/0:10:10,0	./.:0:.,.	./.:0:.,.	./.:0:.,.	./.:0:.,.	0/0:17:17,0	./.:0:.,.	./.:0:.,.	0/0:11:11,0	./.:0:.,.	0/0:18:18,0	0/0:10:10,0	0/0:16:16,0	0/0:12:12,0	0/0:14:14,0	0/0:13:13,0	./.:0:.,.	./.:0:.,.	0/0:10:10,0	./.:0:.,.	0/1:8:5,3	0/1:12:5,7	1/1:11:0,11	./.:0:.,.
MockRefGenome	138099	.	C	T	.	PASS	AC=7;AF=0.035;DP=829;AV=14.56;NS=34	GT:DP:AD	0/0:15:15,0	0/0:59:59,0	1/1:13:0,13	0/0:33:33,0	./.:0:.,.	0/0:12:12,0	0/1:19:6,13	./.:0:.,.	./.:0:.,.	./.:0:.,.	0/0:12:12,0	0/0:10:10,0	./.:0:.,.	./.:0:.,.	./.:0:.,.	./.:0:.,.	0/0:11:11,0	0/0:11:11,0	./.:0:.,.	./.:0:.,.	./.:0:.,.	./.:0:.,.	0/0:17:17,0	./.:0:.,.	./.:0:.,.	0/0:12:12,0	./.:0:.,.	0/1:18:10,8	0/0:10:10,0	0/0:17:17,0	0/0:13:13,0	0/0:14:14,0	0/1:13:9,4	./.:0:.,.	./.:0:.,.	0/0:11:11,0	./.:0:.,.	./.:0:.,.	0/0:12:12,0	0/0:11:11,0	./.:0:.,.
MockRefGenome	138102	.	T	C	.	PASS	AC=8;AF=0.040;DP=834;AV=14.47;NS=34	GT:DP:AD	0/0:15:15,0	0/1:59:18,41	0/0:13:13,0	0/0:33:33,0	./.:0:.,.	0/0:12:12,0	0/0:19:19,0	0/1:8:4,4	./.:0:.,.	./.:0:.,.	0/1:12:6,6	0/0:10:10,0	./.:0:.,.	./.:0:.,.	./.:0:.,.	./.:0:.,.	0/1:11:8,3	0/1:11:4,7	./.:0:.,.	./.:0:.,.	./.:0:.,.	./.:0:.,.	0/0:17:17,0	./.:0:.,.	./.:0:.,.	0/0:12:12,0	./.:0:.,.	0/0:18:18,0	0/0:10:10,0	0/0:17:17,0	0/0:13:13,0	0/0:14:14,0	./.:0:.,.	./.:0:.,.	./.:0:.,.	0/0:11:11,0	./.:0:.,.	./.:0:.,.	0/0:12:12,0	0/0:11:11,0	./.:0:.,.
MockRefGenome	138111	.	G	A	.	PASS	AC=19;AF=0.095;DP=847;AV=14.53;NS=36	GT:DP:AD	0/1:15:10,5	0/0:61:61,0	0/0:13:13,0	1/1:34:0,34	0/0:10:10,0	0/0:12:12,0	0/0:19:19,0	./.:0:.,.	./.:0:.,.	./.:0:.,.	0/0:12:12,0	0/0:10:10,0	./.:0:.,.	./.:0:.,.	./.:0:.,.	./.:0:.,.	0/0:11:11,0	0/0:11:11,0	./.:0:.,.	./.:0:.,.	./.:0:.,.	./.:0:.,.	0/0:17:17,0	./.:0:.,.	./.:0:.,.	0/0:12:12,0	./.:0:.,.	0/0:19:19,0	0/0:10:10,0	0/0:18:18,0	0/0:13:13,0	0/0:14:14,0	0/0:13:13,0	./.:0:.,.	./.:0:.,.	0/0:11:11,0	./.:0:.,.	0/1:8:5,3	0/1:12:5,7	1/1:11:0,11	./.:0:.,.
MockRefGenome	138114	.	T	C	.	PASS	AC=20;AF=0.100;DP=849;AV=14.66;NS=35	GT:DP:AD	0/0:15:15,0	0/1:62:43,19	0/0:13:13,0	0/0:34:34,0	0/1:11:6,5	0/0:12:12,0	1/1:19:0,19	0/1:8:4,4	./.:0:.,.	./.:0:.,.	0/1:12:6,6	0/0:10:10,0	./.:0:.,.	./.:0:.,.	./.:0:.,.	./.:0:.,.	0/1:11:3,8	0/1:11:7,4	./.:0:.,.	./.:0:.,.	./.:0:.,.	./.:0:.,.	0/1:17:4,13	./.:0:.,.	./.:0:.,.	0/0:12:12,0	./.:0:.,.	0/1:19:10,9	0/0:10:10,0	0/1:18:9,9	0/0:13:13,0	1/1:14:0,14	0/0:13:13,0	./.:0:.,.	./.:0:.,.	1/1:11:0,11	./.:0:.,.	./.:0:.,.	0/0:12:12,0	0/0:11:11,0	./.:0:.,.
MockRefGenome	138117	.	T	C	.	PASS	AC=8;AF=0.040;DP=865;AV=14.89;NS=36	GT:DP:AD	0/0:15:15,0	0/1:64:21,43	0/0:14:14,0	0/0:35:35,0	0/0:11:11,0	0/0:12:12,0	0/0:19:19,0	0/1:8:4,4	./.:0:.,.	./.:0:.,.	0/1:12:6,6	0/0:10:10,0	./.:0:.,.	./.:0:.,.	./.:0:.,.	./.:0:.,.	0/1:12:9,3	0/1:11:4,7	./.:0:.,.	./.:0:.,.	./.:0:.,.	./.:0:.,.	0/0:17:17,0	./.:0:.,.	./.:0:.,.	0/0:12:12,0	./.:0:.,.	0/0:19:19,0	0/0:10:10,0	0/0:18:18,0	0/0:14:14,0	0/0:14:14,0	0/0:13:13,0	./.:0:.,.	./.:0:.,.	0/0:11:11,0	./.:0:.,.	./.:0:.,.	0/0:12:12,0	0/0:12:12,0	./.:0:.,.
MockRefGenome	138120	.	C	T	.	PASS	AC=9;AF=0.045;DP=869;AV=14.86;NS=35	GT:DP:AD	./.:0:.,.	0/1:64:21,43	0/0:14:14,0	0/0:35:35,0	0/0:11:11,0	0/0:12:12,0	0/0:19:19,0	0/1:8:4,4	./.:0:.,.	./.:0:.,.	0/1:12:6,6	0/0:10:10,0	./.:0:.,.	./.:0:.,.	./.:0:.,.	./.:0:.,.	0/1:12:9,3	0/1:11:4,7	./.:0:.,.	./.:0:.,.	./.:0:.,.	./.:0:.,.	0/0:17:17,0	./.:0:.,.	./.:0:.,.	0/0:12:12,0	./.:0:.,.	0/0:19:19,0	0/0:10:10,0	0/0:18:18,0	0/0:14:14,0	0/0:14:14,0	0/0:13:13,0	./.:0:.,.	./.:0:.,.	0/0:11:11,0	./.:0:.,.	./.:0:.,.	./.:0:.,.	0/0:12:12,0	./.:0:.,.
MockRefGenome	138159	.	A	T	.	PASS	AC=11;AF=0.055;DP=917;AV=14.98;NS=41	GT:DP:AD	0/0:15:15,0	0/0:67:67,0	1/1:17:0,17	0/0:36:36,0	0/0:11:11,0	0/0:12:12,0	0/0:20:20,0	./.:0:.,.	0/0:10:10,0	./.:0:.,.	0/0:13:13,0	1/1:10:0,10	./.:0:.,.	./.:0:.,.	./.:0:.,.	./.:0:.,.	0/0:12:12,0	0/0:11:11,0	./.:0:.,.	0/1:7:4,3	./.:0:.,.	./.:0:.,.	0/0:18:18,0	./.:0:.,.	./.:0:.,.	0/0:13:13,0	0/1:10:4,6	0/0:22:22,0	0/0:10:10,0	0/0:21:21,0	0/0:15:15,0	0/0:14:14,0	0/1:13:9,4	./.:0:.,.	./.:0:.,.	0/0:12:12,0	./.:0:.,.	0/1:10:5,5	0/0:12:12,0	0/0:12:12,0	./.:0:.,.
MockRefGenome	138162	.	T	C	.	PASS	AC=11;AF=0.055;DP=917;AV=15.05;NS=39	GT:DP:AD	./.:0:.,.	0/0:67:67,0	1/1:17:0,17	0/0:36:36,0	0/0:11:11,0	0/0:12:12,0	0/0:20:20,0	./.:0:.,.	0/0:10:10,0	./.:0:.,.	0/0:13:13,0	1/1:10:0,10	./.:0:.,.	./.:0:.,.	./.:0:.,.	./.:0:.,.	0/0:12:12,0	0/0:11:11,0	./.:0:.,.	0/1:7:4,3	./.:0:.,.	./.:0:.,.	0/0:18:18,0	./.:0:.,.	./.:0:.,.	0/0:13:13,0	0/1:10:4,6	0/0:22:22,0	0/0:10:10,0	0/0:21:21,0	0/0:15:15,0	0/0:14:14,0	0/1:13:9,4	./.:0:.,.	./.:0:.,.	0/0:12:12,0	./.:0:.,.	0/1:10:5,5	./.:0:.,.	0/0:12:12,0	./.:0:.,.
MockRefGenome	138174	.	G	A	.	PASS	AC=8;AF=0.040;DP=913;AV=14.71;NS=42	GT:DP:AD	0/0:14:14,0	0/0:67:67,0	0/0:17:17,0	0/0:36:36,0	0/0:11:11,0	0/0:12:12,0	0/0:20:20,0	./.:0:.,.	0/0:10:10,0	./.:0:.,.	0/0:13:13,0	1/1:10:0,10	./.:0:.,.	./.:0:.,.	./.:0:.,.	./.:0:.,.	0/0:12:12,0	0/0:11:11,0	./.:0:.,.	0/1:7:4,3	./.:0:.,.	./.:0:.,.	0/0:18:18,0	./.:0:.,.	0/1:7:3,4	0/0:13:13,0	0/1:10:4,6	0/0:21:21,0	0/0:10:10,0	0/0:21:21,0	0/0:15:15,0	0/0:14:14,0	0/0:13:13,0	./.:0:.,.	./.:0:.,.	0/0:12:12,0	./.:0:.,.	0/1:10:5,5	0/0:12:12,0	0/0:12:12,0	./.:0:.,.
MockRefGenome	139882	.	G	A	.	PASS	AC=26;AF=0.130;DP=1616;AV=18.75;NS=77	GT:DP:AD	0/0:39:39,0	0/0:91:91,0	0/0:32:32,0	0/1:81:44,37	0/0:18:18,0	0/0:15:15,0	./.:0:.,.	0/0:18:18,0	0/0:42:42,0	0/0:18:18,0	0/0:22:22,0	./.:0:.,.	0/0:17:17,0	0/0:23:23,0	0/1:16:10,6	0/0:17:17,0	0/0:21:21,0	0/0:23:22,1	0/0:12:12,0	0/0:13:13,0	0/0:16:16,0	0/0:16:16,0	0/1:18:9,9	0/0:13:13,0	./.:0:.,.	0/0:10:10,0	0/0:17:17,0	0/0:33:33,0	0/0:23:23,0	0/0:18:18,0	0/0:15:15,0	0/0:12:12,0	0/0:12:12,0	0/0:16:16,0	0/0:22:22,0	0/0:17:17,0	0/0:19:19,0	0/0:12:12,0	0/0:22:22,0	0/0:23:23,0	./.:0:.,.
MockRefGenome	139924	.	C	G	.	PASS	AC=10;AF=0.050;DP=1596;AV=18.84;NS=73	GT:DP:AD	0/0:39:39,0	0/1:91:71,20	0/0:32:32,0	0/0:81:81,0	0/0:18:18,0	0/0:14:14,0	./.:0:.,.	0/1:18:14,4	0/0:41:41,0	0/0:17:17,0	0/0:22:22,0	./.:0:.,.	0/1:17:7,10	0/0:23:23,0	0/1:16:10,6	0/1:17:13,4	0/0:21:21,0	0/0:22:22,0	0/0:12:12,0	0/0:12:12,0	0/0:16:16,0	0/0:16:16,0	./.:0:.,.	0/0:13:13,0	./.:0:.,.	0/0:10:10,0	0/0:17:17,0	0/0:33:33,0	0/0:23:23,0	0/0:18:18,0	0/0:15:15,0	0/0:12:12,0	0/0:12:12,0	0/0:15:15,0	0/0:22:22,0	0/0:16:16,0	./.:0:.,.	0/0:12:12,0	0/0:22:22,0	0/0:23:23,0	./.:0:.,.
MockRefGenome	139945	.	G	A	.	PASS	AC=15;AF=0.075;DP=1571;AV=18.62;NS=74	GT:DP:AD	0/0:39:39,0	0/0:90:89,1	0/0:32:32,0	0/1:81:44,37	0/0:18:18,0	0/0:14:14,0	./.:0:.,.	0/0:18:18,0	0/0:40:40,0	0/0:17:17,0	0/0:22:22,0	./.:0:.,.	0/0:14:14,0	0/0:23:23,0	0/0:15:15,0	0/0:16:16,0	0/0:21:21,0	0/0:21:20,1	0/0:11:11,0	0/0:12:12,0	0/0:16:16,0	0/0:16:16,0	0/0:18:18,0	0/0:13:13,0	./.:0:.,.	0/0:10:10,0	0/0:16:16,0	0/0:33:33,0	0/0:21:21,0	0/0:18:18,0	0/0:15:15,0	0/0:12:12,0	0/0:12:12,0	0/0:14:14,0	0/0:22:22,0	0/0:16:16,0	0/0:18:18,0	0/0:12:12,0	0/0:22:22,0	0/0:23:23,0	./.:0:.,.
MockRefGenome	139963	.	T	C	.	PASS	AC=52;AF=0.260;DP=1544;AV=18.22;NS=74	GT:DP:AD	0/1:39:23,16	0/1:90:20,70	0/0:32:32,0	0/1:81:38,43	0/0:17:17,0	0/0:14:14,0	./.:0:.,.	0/1:18:8,10	0/0:39:39,0	1/1:17:0,17	0/1:22:3,19	./.:0:.,.	0/1:14:9,5	0/1:23:18,5	0/0:14:14,0	0/1:16:9,7	1/1:21:0,21	0/1:21:5,16	0/0:11:11,0	0/0:12:12,0	0/0:16:16,0	0/0:15:15,0	./.:0:.,.	./.:0:.,.	./.:0:.,.	0/0:10:10,0	0/0:16:16,0	0/0:33:33,0	0/1:19:12,7	0/0:18:18,0	0/0:13:13,0	0/0:12:12,0	./.:0:.,.	0/0:13:13,0	0/1:22:10,12	0/0:16:16,0	0/1:18:6,12	0/1:12:7,5	0/1:22:17,5	0/1:22:12,10	0/1:7:4,3
MockRefGenome	140029	.	G	A	.	PASS	AC=34;AF=0.170;DP=1381;AV=17.28;NS=65	GT:DP:AD	0/1:37:21,16	0/0:78:78,0	0/0:30:30,0	0/1:78:37,41	0/0:15:15,0	0/0:15:15,0	./.:0:.,.	0/0:15:15,0	0/0:36:36,0	0/0:16:16,0	0/0:19:19,0	./.:0:.,.	0/0:14:14,0	0/0:19:19,0	0/0:12:12,0	0/0:16:16,0	0/1:15:11,4	0/0:21:21,0	./.:0:.,.	0/0:12:12,0	0/0:15:15,0	0/0:12:12,0	./.:0:.,.	./.:0:.,.	./.:0:.,.	./.:0:.,.	0/0:14:14,0	0/0:31:31,0	0/0:16:16,0	0/0:17:17,0	./.:0:.,.	0/0:12:12,0	0/0:11:11,0	0/0:13:13,0	0/0:21:21,0	0/0:16:16,0	0/0:17:17,0	0/1:11:6,5	0/1:19:14,5	0/1:19:13,6	0/1:6:3,3
MockRefGenome	140050	.	C	T	.	PASS	AC=41;AF=0.205;DP=1416;AV=17.71;NS=65	GT:DP:AD	0/1:38:22,16	0/0:81:81,0	0/0:32:32,0	1/1:79:1,78	0/0:15:15,0	0/0:15:15,0	./.:0:.,.	0/1:15:7,8	0/0:36:36,0	0/0:16:16,0	0/0:19:19,0	./.:0:.,.	0/0:14:14,0	0/0:20:20,0	0/0:12:12,0	0/0:16:16,0	0/0:15:15,0	0/0:22:22,0	./.:0:.,.	0/0:12:12,0	0/0:15:15,0	0/0:14:14,0	./.:0:.,.	./.:0:.,.	./.:0:.,.	./.:0:.,.	0/0:14:14,0	0/0:31:31,0	0/1:16:10,6	0/0:17:17,0	./.:0:.,.	0/0:12:12,0	0/0:11:11,0	0/0:13:13,0	0/1:21:10,11	0/0:16:16,0	0/0:17:17,0	0/1:12:7,5	0/1:20:15,5	0/1:19:13,6	0/1:6:3,3
MockRefGenome	140083	.	G	A	.	PASS	AC=14;AF=0.070;DP=1477;AV=17.74;NS=73	GT:DP:AD	0/0:38:38,0	0/0:84:84,0	0/0:32:32,0	0/1:81:44,37	0/0:16:16,0	0/0:15:15,0	./.:0:.,.	0/0:16:16,0	0/0:37:37,0	0/0:16:16,0	0/0:19:19,0	./.:0:.,.	0/0:16:16,0	0/0:23:23,0	0/0:12:12,0	0/0:16:16,0	0/0:19:19,0	0/0:22:22,0	0/0:10:10,0	0/0:12:12,0	0/0:15:15,0	0/0:14:14,0	0/0:17:17,0	0/0:13:13,0	./.:0:.,.	0/0:10:10,0	0/0:15:15,0	0/0:32:32,0	0/0:17:17,0	0/0:18:18,0	0/0:11:11,0	0/0:12:12,0	0/0:12:12,0	0/0:13:13,0	0/0:22:22,0	0/0:16:16,0	0/0:17:17,0	0/0:12:12,0	0/0:21:21,0	0/0:20:20,0	./.:0:.,.
MockRefGenome	140158	.	T	C	.	PASS	AC=40;AF=0.200;DP=1600;AV=19.10;NS=71	GT:DP:AD	0/1:39:23,16	0/1:91:71,20	0/0:32:32,0	0/1:80:37,43	0/0:18:18,0	0/0:15:15,0	./.:0:.,.	0/1:18:14,4	0/0:42:42,0	0/0:18:18,0	0/0:22:22,0	./.:0:.,.	0/1:17:7,10	0/0:23:23,0	0/0:16:16,0	0/1:17:13,4	0/0:21:21,0	0/0:23:23,0	0/0:12:12,0	0/0:13:13,0	0/0:16:16,0	0/0:16:16,0	./.:0:.,.	./.:0:.,.	./.:0:.,.	0/0:10:10,0	0/0:17:17,0	0/0:33:33,0	0/1:22:15,7	0/0:18:18,0	0/0:15:15,0	0/0:12:12,0	./.:0:.,.	0/0:16:16,0	1/1:22:0,22	0/0:17:17,0	./.:0:.,.	0/1:12:7,5	0/1:22:17,5	0/1:23:13,10	0/1:6:3,3
MockRefGenome	140161	.	G	A	.	PASS	AC=24;AF=0.120;DP=1600;AV=19.46;NS=68	GT:DP:AD	0/0:39:39,0	0/0:91:91,0	0/1:32:20,12	0/0:81:81,0	0/0:18:18,0	0/1:15:7,8	./.:0:.,.	./.:0:.,.	0/0:42:42,0	0/0:18:18,0	0/0:22:22,0	./.:0:.,.	0/0:17:17,0	0/0:23:23,0	0/1:16:10,6	0/0:17:17,0	0/0:21:21,0	0/0:23:23,0	1/1:12:0,12	1/1:13:0,13	./.:0:.,.	./.:0:.,.	0/1:18:9,9	0/1:13:8,5	./.:0:.,.	1/1:10:0,10	0/1:17:8,9	0/1:33:14,19	0/0:22:22,0	0/0:18:18,0	0/1:15:6,9	0/0:12:12,0	0/1:12:5,7	0/1:16:5,11	0/0:22:22,0	0/0:17:17,0	0/0:19:19,0	./.:0:.,.	0/0:22:22,0	0/1:23:19,4	./.:0:.,.
MockRefGenome	140869	.	C	A	.	PASS	AC=12;AF=0.060;DP=1554;AV=18.97;NS=71	GT:DP:AD	0/0:31:31,0	0/1:60:16,44	0/0:35:35,0	0/0:77:77,0	0/0:18:18,0	0/0:20:20,0	0/0:18:18,0	./.:0:.,.	0/0:24:24,0	0/1:9:4,5	0/1:28:14,14	0/0:13:13,0	0/1:21:12,9	./.:0:.,.	0/0:28:28,0	./.:0:.,.	0/1:9:5,4	0/0:16:16,0	0/0:11:11,0	0/0:18:18,0	0/0:20:20,0	0/0:13:13,0	0/0:13:13,0	0/0:15:15,0	0/0:22:22,0	0/0:10:10,0	0/0:15:15,0	./.:0:.,.	0/0:23:23,0	0/0:14:14,0	0/0:13:13,0	0/0:11:11,0	0/1:11:7,4	0/0:29:29,0	0/0:18:18,0	0/0:16:16,0	0/0:20:20,0	0/0:17:17,0	0/0:27:27,0	0/0:32:32,0	0/0:10:10,0
MockRefGenome	140919	.	C	T	.	PASS	AC=38;AF=0.190;DP=1554;AV=18.40;NS=75	GT:DP:AD	0/1:31:15,16	0/0:60:60,0	0/0:35:35,0	0/1:77:39,38	0/0:18:18,0	0/0:20:20,0	0/0:18:18,0	./.:0:.,.	0/0:24:24,0	./.:0:.,.	0/0:28:28,0	0/0:13:13,0	0/0:21:21,0	./.:0:.,.	0/0:28:28,0	./.:0:.,.	./.:0:.,.	0/0:16:16,0	0/0:11:11,0	0/0:18:18,0	0/0:20:20,0	0/0:13:13,0	0/0:13:13,0	0/0:15:15,0	0/0:22:22,0	0/0:10:10,0	0/0:15:15,0	./.:0:.,.	0/0:23:23,0	0/0:14:14,0	0/0:13:13,0	0/0:11:11,0	0/0:11:11,0	0/0:29:29,0	0/0:18:18,0	0/0:16:16,0	0/0:20:20,0	0/1:17:13,4	0/1:27:19,8	0/1:32:21,11	./.:0:.,.
MockRefGenome	140920	.	G	A	.	PASS	AC=38;AF=0.190;DP=1554;AV=18.39;NS=75	GT:DP:AD	0/1:31:15,16	0/0:60:59,1	0/0:35:35,0	0/1:77:39,38	0/0:18:18,0	0/0:20:20,0	0/0:18:18,0	./.:0:.,.	0/0:24:24,0	./.:0:.,.	0/0:28:28,0	0/0:13:13,0	0/0:21:21,0	./.:0:.,.	0/0:28:28,0	./.:0:.,.	./.:0:.,.	0/0:16:16,0	0/0:11:11,0	0/0:18:18,0	0/0:20:20,0	0/0:13:13,0	0/0:13:13,0	0/0:15:15,0	0/0:22:22,0	0/0:10:10,0	0/0:15:15,0	./.:0:.,.	0/0:23:23,0	0/0:14:14,0	0/0:13:13,0	0/0:11:11,0	0/0:11:11,0	0/0:29:29,0	0/0:18:18,0	0/0:16:16,0	0/0:20:20,0	0/1:17:13,4	0/1:27:19,8	0/1:32:21,11	./.:0:.,.
MockRefGenome	140938	.	G	A	.	PASS	AC=12;AF=0.060;DP=1545;AV=18.97;NS=71	GT:DP:AD	0/0:31:31,0	0/0:60:60,0	0/0:35:35,0	0/0:77:77,0	0/0:18:18,0	0/1:20:8,12	0/0:18:18,0	./.:0:.,.	0/1:24:16,8	./.:0:.,.	0/0:27:27,0	0/0:13:13,0	0/0:20:20,0	./.:0:.,.	0/0:28:28,0	./.:0:.,.	./.:0:.,.	0/0:16:16,0	0/1:11:5,6	1/1:18:0,18	0/0:20:20,0	0/1:13:3,10	0/1:13:5,8	0/0:15:15,0	0/0:22:22,0	0/0:10:10,0	0/1:15:5,10	./.:0:.,.	0/0:23:23,0	0/0:14:14,0	0/0:13:13,0	0/0:11:11,0	0/0:11:11,0	0/0:29:29,0	0/0:17:17,0	0/0:16:16,0	0/0:20:20,0	0/0:17:17,0	0/0:27:27,0	0/1:32:22,10	0/0:10:10,0
MockRefGenome	140947	.	C	T	.	PASS	AC=30;AF=0.150;DP=1540;AV=18.57;NS=72	GT:DP:AD	0/0:31:31,0	0/1:60:28,32	0/0:35:35,0	0/1:77:38,39	0/0:18:18,0	0/0:20:20,0	0/0:18:18,0	./.:0:.,.	0/0:24:24,0	./.:0:.,.	1/1:27:0,27	0/0:13:13,0	0/1:20:5,15	./.:0:.,.	0/0:28:28,0	./.:0:.,.	./.:0:.,.	0/1:16:4,12	0/0:11:11,0	0/0:18:18,0	0/0:20:20,0	0/0:13:13,0	0/0:13:13,0	0/0:15:15,0	0/0:21:21,0	0/0:10:10,0	0/0:15:15,0	./.:0:.,.	0/0:23:23,0	0/0:14:14,0	0/0:13:13,0	0/0:11:11,0	0/0:11:11,0	0/0:29:29,0	0/0:17:17,0	0/0:16:16,0	1/1:20:0,20	0/0:17:17,0	0/0:26:26,0	0/0:32:32,0	0/0:10:10,0
MockRefGenome	140950	.	G	A	.	PASS	AC=34;AF=0.170;DP=1535;AV=18.28;NS=74	GT:DP:AD	0/1:31:15,16	0/0:60:60,0	0/0:35:35,0	0/1:77:39,38	0/0:18:18,0	0/0:20:20,0	0/0:18:18,0	./.:0:.,.	0/0:24:24,0	./.:0:.,.	0/0:27:27,0	0/0:13:13,0	0/0:20:20,0	./.:0:.,.	0/0:27:27,0	./.:0:.,.	./.:0:.,.	0/0:16:16,0	0/0:11:11,0	0/0:18:18,0	0/0:20:20,0	0/0:13:13,0	0/0:13:13,0	0/0:15:15,0	0/0:21:21,0	0/0:10:10,0	0/0:15:15,0	./.:0:.,.	0/0:23:23,0	0/0:14:14,0	0/0:13:13,0	0/0:11:11,0	0/0:11:11,0	0/0:29:29,0	0/0:17:17,0	0/0:16:16,0	0/0:20:20,0	0/1:17:13,4	0/1:26:18,8	0/1:32:21,11	./.:0:.,.
MockRefGenome	140995	.	A	C	.	PASS	AC=79;AF=0.395;DP=1208;AV=18.52;NS=58	GT:DP:AD	1/0:30:14,16	1/1:59:59,0	1/1:34:34,0	1/0:76:39,37	1/1:17:17,0	./.:0:.,.	1/1:18:18,0	./.:0:.,.	1/1:24:24,0	./.:0:.,.	./.:0:.,.	1/1:13:13,0	./.:0:.,.	./.:0:.,.	1/1:27:27,0	./.:0:.,.	./.:0:.,.	1/1:15:15,0	./.:0:.,.	./.:0:.,.	./.:0:.,.	./.:0:.,.	1/1:12:12,0	1/1:15:15,0	1/1:21:21,0	1/1:10:10,0	./.:0:.,.	./.:0:.,.	1/1:23:23,0	1/1:14:14,0	1/1:13:13,0	1/1:11:11,0	1/1:11:11,0	1/1:29:29,0	./.:0:.,.	1/1:16:16,0	./.:0:.,.	1/0:16:12,4	1/0:26:18,8	1/0:32:21,11	./.:0:.,.
MockRefGenome	141042	.	C	T	.	PASS	AC=29;AF=0.145;DP=1397;AV=17.57;NS=67	GT:DP:AD	0/1:26:13,13	0/0:58:58,0	0/0:27:27,0	0/1:65:32,33	0/0:16:16,0	0/0:16:16,0	0/0:16:16,0	./.:0:.,.	0/0:22:22,0	./.:0:.,.	0/0:28:28,0	0/0:11:11,0	0/0:20:20,0	./.:0:.,.	0/0:26:26,0	./.:0:.,.	./.:0:.,.	0/0:15:15,0	./.:0:.,.	0/0:18:18,0	0/0:19:19,0	0/0:12:12,0	0/0:12:12,0	0/0:15:15,0	0/0:19:19,0	0/0:10:10,0	0/0:15:15,0	./.:0:.,.	0/0:23:23,0	0/0:13:13,0	0/0:11:11,0	0/0:10:10,0	./.:0:.,.	0/0:24:24,0	0/0:15:15,0	0/0:15:15,0	0/0:18:18,0	0/1:13:9,4	0/1:23:15,8	0/1:31:21,10	./.:0:.,.
MockRefGenome	141064	.	G	C	.	PASS	AC=30;AF=0.150;DP=1423;AV=17.58;NS=69	GT:DP:AD	0/1:26:13,13	0/0:58:58,0	0/0:29:29,0	0/1:73:38,35	0/0:16:16,0	0/0:16:16,0	0/0:16:16,0	./.:0:.,.	0/0:23:23,0	./.:0:.,.	0/0:28:28,0	0/0:11:11,0	0/0:20:20,0	./.:0:.,.	0/0:26:26,0	./.:0:.,.	./.:0:.,.	0/0:15:15,0	./.:0:.,.	0/0:18:18,0	0/0:20:20,0	0/0:12:12,0	0/0:12:12,0	0/0:15:15,0	0/0:19:19,0	0/0:10:10,0	0/0:15:15,0	./.:0:.,.	0/0:23:23,0	0/0:13:13,0	0/0:12:12,0	0/0:10:10,0	./.:0:.,.	0/0:25:25,0	0/0:16:16,0	0/0:16:16,0	0/0:17:17,0	0/1:14:10,4	0/1:24:16,8	0/1:31:21,10	./.:0:.,.
MockRefGenome	141091	.	G	A	.	PASS	AC=38;AF=0.190;DP=1486;AV=17.81;NS=73	GT:DP:AD	0/1:28:14,14	0/0:60:60,0	0/0:31:31,0	0/1:77:39,38	0/0:16:16,0	0/0:19:19,0	0/0:17:17,0	./.:0:.,.	0/0:23:23,0	./.:0:.,.	0/0:28:28,0	0/0:11:11,0	0/0:21:21,0	./.:0:.,.	0/0:27:27,0	./.:0:.,.	./.:0:.,.	0/0:16:16,0	0/0:10:10,0	0/0:18:18,0	0/0:20:20,0	0/0:13:13,0	0/0:12:12,0	0/0:15:15,0	0/0:20:20,0	0/0:10:10,0	0/0:15:15,0	./.:0:.,.	0/0:23:23,0	0/0:13:13,0	0/0:12:12,0	0/0:10:10,0	0/0:10:10,0	0/0:26:26,0	0/0:17:17,0	0/0:16:16,0	0/0:18:18,0	0/1:17:13,4	0/1:26:18,8	0/1:32:21,11	./.:0:.,.
MockRefGenome	141094	.	G	C	.	PASS	AC=38;AF=0.190;DP=1489;AV=17.73;NS=74	GT:DP:AD	0/1:28:14,14	0/0:60:60,0	0/0:31:31,0	0/1:78:39,39	0/0:16:16,0	0/0:19:19,0	0/0:17:17,0	./.:0:.,.	0/0:23:23,0	./.:0:.,.	0/0:28:28,0	0/0:11:11,0	0/0:21:21,0	./.:0:.,.	0/0:27:27,0	./.:0:.,.	./.:0:.,.	0/0:16:16,0	0/1:10:4,6	0/0:18:18,0	0/0:20:20,0	0/0:13:13,0	0/0:12:12,0	0/0:15:15,0	0/0:20:20,0	0/0:10:10,0	0/0:15:15,0	./.:0:.,.	0/0:23:23,0	0/0:13:13,0	0/0:12:12,0	0/0:10:10,0	0/0:10:10,0	0/0:26:26,0	0/0:18:18,0	0/0:16:16,0	0/0:18:18,0	0/1:17:13,4	0/1:26:18,8	0/1:32:21,11	./.:0:.,.
MockRefGenome	141121	.	C	A	.	PASS	AC=32;AF=0.160;DP=1515;AV=18.19;NS=73	GT:DP:AD	0/0:28:28,0	1/1:60:0,60	0/0:32:32,0	0/1:78:39,39	0/0:17:17,0	0/0:20:20,0	0/0:18:18,0	./.:0:.,.	0/0:23:23,0	./.:0:.,.	0/1:28:10,18	0/0:13:13,0	1/1:21:0,21	./.:0:.,.	0/0:27:27,0	./.:0:.,.	./.:0:.,.	0/1:16:8,8	0/0:10:10,0	0/0:18:18,0	0/0:20:20,0	0/0:13:13,0	0/0:12:12,0	0/0:15:15,0	0/0:21:21,0	0/0:10:10,0	0/0:15:15,0	./.:0:.,.	0/0:23:23,0	0/0:14:14,0	0/0:12:12,0	0/0:11:11,0	0/1:10:6,4	0/0:28:28,0	0/0:18:18,0	0/0:16:16,0	0/1:18:13,5	0/0:17:17,0	0/0:27:27,0	0/0:32:32,0	0/0:10:10,0
MockRefGenome	141191	.	C	T	.	PASS	AC=17;AF=0.085;DP=546;AV=12.90;NS=21	GT:DP:AD	./.:0:.,.	0/1:33:13,20	0/0:14:14,0	0/0:20:20,0	./.:0:.,.	./.:0:.,.	0/1:11:3,8	./.:0:.,.	0/0:24:24,0	0/1:11:7,4	0/1:17:14,3	./.:0:.,.	./.:0:.,.	0/1:12:7,5	./.:0:.,.	1/1:11:0,11	1/1:14:0,14	./.:0:.,.	./.:0:.,.	./.:0:.,.	./.:0:.,.	./.:0:.,.	0/1:7:3,4	./.:0:.,.	./.:0:.,.	./.:0:.,.	./.:0:.,.	./.:0:.,.	./.:0:.,.	0/1:17:5,12	./.:0:.,.	0/1:8:3,5	./.:0:.,.	./.:0:.,.	./.:0:.,.	./.:0:.,.	./.:0:.,.	./.:0:.,.	./.:0:.,.	./.:0:.,.	./.:0:.,.
MockRefGenome	141218	.	C	T	.	PASS	AC=16;AF=0.080;DP=549;AV=13.24;NS=21	GT:DP:AD	./.:0:.,.	0/1:33:20,13	1/1:14:0,14	0/0:20:20,0	./.:0:.,.	./.:0:.,.	0/1:11:8,3	./.:0:.,.	1/1:24:1,23	0/1:11:4,7	0/1:17:3,14	./.:0:.,.	./.:0:.,.	0/1:12:5,7	./.:0:.,.	0/0:11:11,0	0/0:14:14,0	./.:0:.,.	./.:0:.,.	./.:0:.,.	./.:0:.,.	./.:0:.,.	0/1:7:4,3	./.:0:.,.	./.:0:.,.	./.:0:.,.	./.:0:.,.	./.:0:.,.	./.:0:.,.	0/1:17:12,5	./.:0:.,.	./.:0:.,.	./.:0:.,.	./.:0:.,.	./.:0:.,.	./.:0:.,.	./.:0:.,.	./.:0:.,.	./.:0:.,.	./.:0:.,.	0/1:8:5,3
MockRefGenome	141281	.	T	C	.	PASS	AC=18;AF=0.090;DP=522;AV=12.67;NS=21	GT:DP:AD	./.:0:.,.	0/1:32:12,20	0/1:14:5,9	0/0:19:19,0	./.:0:.,.	./.:0:.,.	0/0:11:11,0	./.:0:.,.	0/1:22:13,9	0/1:10:6,4	0/1:17:14,3	./.:0:.,.	./.:0:.,.	0/1:12:7,5	./.:0:.,.	1/1:11:0,11	1/1:13:0,13	./.:0:.,.	./.:0:.,.	./.:0:.,.	./.:0:.,.	./.:0:.,.	0/1:7:3,4	./.:0:.,.	./.:0:.,.	./.:0:.,.	./.:0:.,.	./.:0:.,.	./.:0:.,.	0/1:17:5,12	./.:0:.,.	0/1:8:3,5	./.:0:.,.	./.:0:.,.	./.:0:.,.	./.:0:.,.	./.:0:.,.	./.:0:.,.	./.:0:.,.	./.:0:.,.	0/1:8:5,3
MockRefGenome	141566	.	T	G	.	PASS	AC=18;AF=0.090;DP=824;AV=16.26;NS=35	GT:DP:AD	0/1:24:10,14	0/0:44:44,0	0/0:21:21,0	1/1:35:0,35	./.:0:.,.	./.:0:.,.	./.:0:.,.	./.:0:.,.	0/0:30:30,0	0/0:16:16,0	0/0:12:12,0	0/0:11:11,0	0/0:13:13,0	0/0:16:16,0	0/0:11:11,0	./.:0:.,.	./.:0:.,.	./.:0:.,.	./.:0:.,.	./.:0:.,.	./.:0:.,.	./.:0:.,.	0/0:10:10,0	0/0:12:12,0	./.:0:.,.	0/0:14:14,0	0/0:13:13,0	0/0:18:18,0	./.:0:.,.	./.:0:.,.	0/0:15:15,0	./.:0:.,.	./.:0:.,.	./.:0:.,.	./.:0:.,.	./.:0:.,.	0/0:15:15,0	0/1:7:3,4	0/1:11:4,7	0/1:18:12,6	./.:0:.,.
MockRefGenome	141572	.	C	A	.	PASS	AC=18;AF=0.090;DP=821;AV=16.17;NS=35	GT:DP:AD	0/1:24:10,14	0/0:44:44,0	0/0:21:21,0	1/1:35:0,35	./.:0:.,.	./.:0:.,.	./.:0:.,.	./.:0:.,.	0/0:30:30,0	0/0:16:16,0	0/0:12:12,0	0/0:11:11,0	0/0:13:13,0	0/0:16:16,0	0/0:10:10,0	./.:0:.,.	./.:0:.,.	./.:0:.,.	./.:0:.,.	./.:0:.,.	./.:0:.,.	./.:0:.,.	0/0:10:10,0	0/0:12:12,0	./.:0:.,.	0/0:14:14,0	0/0:12:12,0	0/0:18:18,0	./.:0:.,.	./.:0:.,.	0/0:15:15,0	./.:0:.,.	./.:0:.,.	./.:0:.,.	./.:0:.,.	./.:0:.,.	0/0:14:14,0	0/1:7:3,4	0/1:11:4,7	0/1:18:12,6	./.:0:.,.
MockRefGenome	141629	.	C	T	.	PASS	AC=18;AF=0.090;DP=797;AV=15.91;NS=35	GT:DP:AD	0/1:24:10,14	0/0:44:44,0	0/0:21:21,0	1/1:35:0,35	./.:0:.,.	./.:0:.,.	./.:0:.,.	./.:0:.,.	0/0:29:29,0	0/0:15:15,0	0/0:12:12,0	0/0:11:11,0	0/0:12:12,0	0/0:16:16,0	0/0:10:10,0	./.:0:.,.	./.:0:.,.	./.:0:.,.	./.:0:.,.	./.:0:.,.	./.:0:.,.	./.:0:.,.	0/0:10:10,0	0/0:10:10,0	./.:0:.,.	0/0:14:14,0	0/0:12:12,0	0/0:18:18,0	./.:0:.,.	./.:0:.,.	0/0:15:15,0	./.:0:.,.	./.:0:.,.	./.:0:.,.	./.:0:.,.	./.:0:.,.	0/0:14:14,0	0/1:7:3,4	0/1:10:3,7	0/1:18:12,6	./.:0:.,.
MockRefGenome	141695	.	A	G	.	PASS	AC=26;AF=0.130;DP=959;AV=16.00;NS=46	GT:DP:AD	0/1:26:10,16	0/0:53:53,0	0/0:21:21,0	0/1:71:35,36	./.:0:.,.	./.:0:.,.	./.:0:.,.	./.:0:.,.	0/0:28:28,0	0/0:13:13,0	0/0:12:12,0	0/0:11:11,0	0/0:12:12,0	0/0:16:16,0	./.:0:.,.	./.:0:.,.	0/0:15:15,0	./.:0:.,.	./.:0:.,.	./.:0:.,.	./.:0:.,.	./.:0:.,.	0/0:10:10,0	0/0:10:10,0	0/0:10:10,0	0/0:14:14,0	0/0:10:10,0	0/0:19:19,0	./.:0:.,.	./.:0:.,.	0/0:14:14,0	./.:0:.,.	./.:0:.,.	./.:0:.,.	./.:0:.,.	./.:0:.,.	0/0:15:15,0	./.:0:.,.	0/1:11:4,7	0/1:23:17,6	./.:0:.,.
MockRefGenome	141707	.	C	T	.	PASS	AC=27;AF=0.135;DP=961;AV=16.04;NS=46	GT:DP:AD	0/1:26:10,16	0/0:53:53,0	0/0:21:21,0	0/1:71:35,36	./.:0:.,.	./.:0:.,.	./.:0:.,.	./.:0:.,.	0/0:28:28,0	0/0:13:13,0	0/0:12:12,0	0/0:11:11,0	0/0:13:13,0	0/0:16:16,0	./.:0:.,.	./.:0:.,.	0/1:15:8,7	./.:0:.,.	./.:0:.,.	./.:0:.,.	./.:0:.,.	./.:0:.,.	0/0:10:10,0	0/0:10:10,0	0/0:10:10,0	0/0:14:14,0	0/0:10:10,0	0/0:19:19,0	./.:0:.,.	./.:0:.,.	0/0:14:14,0	./.:0:.,.	./.:0:.,.	./.:0:.,.	./.:0:.,.	./.:0:.,.	0/0:15:15,0	./.:0:.,.	0/1:11:4,7	0/1:23:17,6	./.:0:.,.
MockRefGenome	141740	.	G	A	.	PASS	AC=28;AF=0.140;DP=977;AV=15.80;NS=49	GT:DP:AD	0/1:26:9,17	0/0:53:53,0	0/0:21:21,0	0/1:72:35,37	./.:0:.,.	./.:0:.,.	./.:0:.,.	./.:0:.,.	0/0:30:30,0	0/0:13:13,0	0/0:12:12,0	0/0:11:11,0	0/0:13:13,0	0/0:16:16,0	0/0:10:10,0	./.:0:.,.	0/0:15:15,0	./.:0:.,.	./.:0:.,.	./.:0:.,.	./.:0:.,.	./.:0:.,.	0/0:10:10,0	0/0:11:11,0	0/0:10:10,0	0/0:14:14,0	0/0:12:12,0	0/0:19:19,0	./.:0:.,.	./.:0:.,.	0/0:14:14,0	./.:0:.,.	./.:0:.,.	./.:0:.,.	./.:0:.,.	./.:0:.,.	0/0:15:15,0	0/1:6:3,3	0/1:11:4,7	0/1:23:17,6	./.:0:.,.
MockRefGenome	143190	.	G	C	.	PASS	AC=14;AF=0.070;DP=622;AV=15.91;NS=23	GT:DP:AD	1/1:10:0,10	0/0:63:63,0	0/0:10:10,0	1/1:33:0,33	0/1:9:5,4	./.:0:.,.	0/0:10:10,0	0/0:11:11,0	./.:0:.,.	./.:0:.,.	./.:0:.,.	./.:0:.,.	0/0:23:23,0	./.:0:.,.	0/0:25:25,0	0/0:14:14,0	0/0:16:16,0	0/0:14:14,0	./.:0:.,.	./.:0:.,.	./.:0:.,.	./.:0:.,.	0/0:10:10,0	./.:0:.,.	./.:0:.,.	./.:0:.,.	./.:0:.,.	./.:0:.,.	./.:0:.,.	./.:0:.,.	./.:0:.,.	./.:0:.,.	./.:0:.,.	./.:0:.,.	./.:0:.,.	./.:0:.,.	0/0:16:16,0	./.:0:.,.	./.:0:.,.	./.:0:.,.	./.:0:.,.
MockRefGenome	143224	.	A	G	.	PASS	AC=15;AF=0.075;DP=607;AV=15.54;NS=24	GT:DP:AD	0/0:10:10,0	0/1:60:34,26	1/1:10:0,10	0/0:33:33,0	./.:0:.,.	./.:0:.,.	1/1:10:0,10	0/0:11:11,0	./.:0:.,.	./.:0:.,.	./.:0:.,.	./.:0:.,.	0/1:21:9,12	0/1:8:5,3	1/1:25:0,25	0/0:13:13,0	0/0:16:16,0	0/0:14:14,0	./.:0:.,.	./.:0:.,.	./.:0:.,.	./.:0:.,.	1/1:10:0,10	./.:0:.,.	./.:0:.,.	./.:0:.,.	./.:0:.,.	./.:0:.,.	0/1:8:3,5	./.:0:.,.	./.:0:.,.	./.:0:.,.	./.:0:.,.	./.:0:.,.	./.:0:.,.	./.:0:.,.	0/0:15:15,0	./.:0:.,.	./.:0:.,.	./.:0:.,.	./.:0:.,.
MockRefGenome	143228	.	A	G	.	PASS	AC=12;AF=0.060;DP=606;AV=16.33;NS=21	GT:DP:AD	1/1:10:0,10	0/0:60:60,0	0/0:10:10,0	1/1:33:0,33	./.:0:.,.	./.:0:.,.	0/0:10:10,0	0/0:11:11,0	./.:0:.,.	./.:0:.,.	./.:0:.,.	./.:0:.,.	0/0:21:21,0	./.:0:.,.	0/0:25:25,0	0/0:13:13,0	0/0:16:16,0	0/0:14:14,0	./.:0:.,.	./.:0:.,.	./.:0:.,.	./.:0:.,.	0/0:10:10,0	./.:0:.,.	./.:0:.,.	./.:0:.,.	./.:0:.,.	./.:0:.,.	./.:0:.,.	./.:0:.,.	./.:0:.,.	./.:0:.,.	./.:0:.,.	./.:0:.,.	./.:0:.,.	./.:0:.,.	0/0:15:15,0	./.:0:.,.	./.:0:.,.	./.:0:.,.	./.:0:.,.
MockRefGenome	143255	.	T	C	.	PASS	AC=11;AF=0.055;DP=594;AV=15.04;NS=25	GT:DP:AD	0/0:10:10,0	0/1:60:34,26	1/1:10:0,10	0/0:33:33,0	0/1:9:5,4	./.:0:.,.	0/0:10:10,0	0/0:11:11,0	./.:0:.,.	./.:0:.,.	./.:0:.,.	./.:0:.,.	0/1:19:7,12	0/1:8:5,3	0/0:25:25,0	0/0:13:13,0	0/0:14:14,0	0/0:14:14,0	./.:0:.,.	./.:0:.,.	./.:0:.,.	./.:0:.,.	1/1:10:0,10	./.:0:.,.	./.:0:.,.	./.:0:.,.	0/1:8:5,3	./.:0:.,.	0/1:8:3,5	./.:0:.,.	./.:0:.,.	./.:0:.,.	./.:0:.,.	./.:0:.,.	./.:0:.,.	./.:0:.,.	0/0:15:15,0	./.:0:.,.	./.:0:.,.	./.:0:.,.	./.:0:.,.
MockRefGenome	143335	.	T	A	.	PASS	AC=9;AF=0.045;DP=639;AV=19.52;NS=27	GT:DP:AD	./.:0:.,.	0/0:65:65,0	0/0:10:10,0	./.:0:.,.	0/0:11:11,0	./.:0:.,.	0/0:10:10,0	0/1:22:16,6	./.:0:.,.	./.:0:.,.	0/1:17:13,4	./.:0:.,.	0/1:31:24,7	0/1:14:10,4	0/0:25:25,0	0/1:37:25,12	0/0:26:26,0	0/0:18:18,0	./.:0:.,.	./.:0:.,.	./.:0:.,.	./.:0:.,.	0/0:10:10,0	./.:0:.,.	./.:0:.,.	./.:0:.,.	./.:0:.,.	./.:0:.,.	0/0:16:16,0	0/0:15:15,0	./.:0:.,.	./.:0:.,.	./.:0:.,.	./.:0:.,.	./.:0:.,.	./.:0:.,.	0/1:33:24,9	./.:0:.,.	./.:0:.,.	./.:0:.,.	./.:0:.,.
MockRefGenome	143418	.	C	T	.	PASS	AC=6;AF=0.030;DP=630;AV=18.43;NS=28	GT:DP:AD	./.:0:.,.	0/0:75:75,0	1/1:10:0,10	./.:0:.,.	0/0:13:13,0	./.:0:.,.	1/1:10:0,10	0/0:18:18,0	./.:0:.,.	./.:0:.,.	0/0:13:13,0	./.:0:.,.	0/0:29:29,0	0/0:12:12,0	0/0:25:25,0	0/0:27:27,0	0/0:28:28,0	0/0:21:21,0	./.:0:.,.	./.:0:.,.	./.:0:.,.	./.:0:.,.	1/1:10:0,10	./.:0:.,.	./.:0:.,.	./.:0:.,.	./.:0:.,.	./.:0:.,.	0/0:17:17,0	0/0:17:17,0	./.:0:.,.	./.:0:.,.	./.:0:.,.	./.:0:.,.	./.:0:.,.	./.:0:.,.	0/0:25:25,0	./.:0:.,.	./.:0:.,.	./.:0:.,.	./.:0:.,.
MockRefGenome	143457	.	C	T	.	PASS	AC=10;AF=0.050;DP=654;AV=19.14;NS=28	GT:DP:AD	./.:0:.,.	0/0:80:80,0	1/1:10:0,10	./.:0:.,.	0/0:13:13,0	./.:0:.,.	1/1:10:0,10	0/0:18:18,0	./.:0:.,.	./.:0:.,.	0/0:13:13,0	./.:0:.,.	0/0:30:30,0	0/0:12:12,0	1/1:25:0,25	0/0:27:27,0	0/0:28:28,0	0/0:22:22,0	./.:0:.,.	./.:0:.,.	./.:0:.,.	./.:0:.,.	1/1:10:0,10	./.:0:.,.	./.:0:.,.	./.:0:.,.	./.:0:.,.	./.:0:.,.	0/0:17:17,0	0/0:19:19,0	./.:0:.,.	./.:0:.,.	./.:0:.,.	./.:0:.,.	./.:0:.,.	./.:0:.,.	0/0:25:25,0	./.:0:.,.	./.:0:.,.	./.:0:.,.	./.:0:.,.
MockRefGenome	143466	.	T	C	.	PASS	AC=10;AF=0.050;DP=653;AV=18.86;NS=29	GT:DP:AD	./.:0:.,.	0/0:80:80,0	1/1:10:0,10	./.:0:.,.	0/0:13:13,0	./.:0:.,.	1/1:10:0,10	0/0:18:18,0	./.:0:.,.	./.:0:.,.	0/0:13:13,0	./.:0:.,.	0/0:30:30,0	0/0:12:12,0	1/1:25:0,25	0/0:27:27,0	0/0:28:28,0	0/0:22:22,0	./.:0:.,.	./.:0:.,.	./.:0:.,.	./.:0:.,.	1/1:10:0,10	./.:0:.,.	./.:0:.,.	./.:0:.,.	./.:0:.,.	./.:0:.,.	0/0:17:17,0	0/0:19:19,0	./.:0:.,.	./.:0:.,.	./.:0:.,.	./.:0:.,.	./.:0:.,.	./.:0:.,.	0/0:25:25,0	./.:0:.,.	./.:0:.,.	./.:0:.,.	./.:0:.,.
MockRefGenome	143861	.	G	A	.	PASS	AC=5;AF=0.025;DP=696;AV=16.65;NS=23	GT:DP:AD	./.:0:.,.	0/1:54:35,19	0/0:32:32,0	0/0:47:47,0	./.:0:.,.	./.:0:.,.	0/0:12:12,0	./.:0:.,.	0/0:14:14,0	0/0:12:12,0	0/0:12:12,0	./.:0:.,.	0/1:7:3,4	./.:0:.,.	0/0:10:10,0	./.:0:.,.	0/0:19:19,0	0/0:16:16,0	./.:0:.,.	0/0:17:17,0	./.:0:.,.	./.:0:.,.	./.:0:.,.	./.:0:.,.	./.:0:.,.	0/0:11:11,0	0/1:10:5,5	0/0:18:18,0	./.:0:.,.	0/1:10:5,5	0/0:15:15,0	./.:0:.,.	./.:0:.,.	./.:0:.,.	./.:0:.,.	./.:0:.,.	./.:0:.,.	./.:0:.,.	./.:0:.,.	./.:0:.,.	./.:0:.,.
MockRefGenome	143878	.	G	A	.	PASS	AC=8;AF=0.040;DP=691;AV=16.17;NS=24	GT:DP:AD	./.:0:.,.	0/0:53:53,0	0/0:32:32,0	0/0:47:47,0	./.:0:.,.	./.:0:.,.	0/1:12:5,7	./.:0:.,.	0/0:14:14,0	0/0:12:12,0	0/0:12:12,0	0/1:6:3,3	./.:0:.,.	./.:0:.,.	0/0:10:10,0	./.:0:.,.	0/0:19:19,0	0/0:16:16,0	./.:0:.,.	0/1:17:10,7	./.:0:.,.	./.:0:.,.	./.:0:.,.	./.:0:.,.	./.:0:.,.	0/1:11:8,3	0/0:10:10,0	0/0:18:18,0	./.:0:.,.	0/1:10:5,5	0/1:15:8,7	./.:0:.,.	./.:0:.,.	./.:0:.,.	./.:0:.,.	./.:0:.,.	./.:0:.,.	./.:0:.,.	./.:0:.,.	./.:0:.,.	./.:0:.,.
MockRefGenome	143891	.	C	T	.	PASS	AC=6;AF=0.030;DP=689;AV=17.33;NS=21	GT:DP:AD	./.:0:.,.	0/1:54:47,7	0/0:32:32,0	0/0:47:47,0	./.:0:.,.	./.:0:.,.	0/0:12:12,0	./.:0:.,.	0/0:13:13,0	0/0:12:12,0	./.:0:.,.	./.:0:.,.	./.:0:.,.	./.:0:.,.	0/0:10:10,0	./.:0:.,.	0/0:19:19,0	0/1:16:6,10	./.:0:.,.	0/0:17:17,0	./.:0:.,.	./.:0:.,.	./.:0:.,.	./.:0:.,.	./.:0:.,.	0/0:11:11,0	0/0:10:10,0	0/0:18:18,0	./.:0:.,.	0/1:10:5,5	0/0:15:15,0	./.:0:.,.	./.:0:.,.	./.:0:.,.	./.:0:.,.	./.:0:.,.	./.:0:.,.	./.:0:.,.	./.:0:.,.	./.:0:.,.	./.:0:.,.
MockRefGenome	143914	.	G	C	.	PASS	AC=9;AF=0.045;DP=683;AV=17.10;NS=21	GT:DP:AD	./.:0:.,.	0/1:54:7,47	0/0:32:32,0	0/0:46:46,0	./.:0:.,.	./.:0:.,.	0/0:12:12,0	./.:0:.,.	0/0:13:13,0	./.:0:.,.	0/1:11:5,6	./.:0:.,.	./.:0:.,.	0/1:9:5,4	0/0:10:10,0	./.:0:.,.	0/1:19:6,13	0/1:16:10,6	./.:0:.,.	0/0:17:17,0	./.:0:.,.	./.:0:.,.	./.:0:.,.	./.:0:.,.	./.:0:.,.	0/0:11:11,0	./.:0:.,.	0/0:18:18,0	./.:0:.,.	0/0:10:10,0	0/0:15:15,0	./.:0:.,.	./.:0:.,.	./.:0:.,.	./.:0:.,.	./.:0:.,.	./.:0:.,.	./.:0:.,.	./.:0:.,.	./.:0:.,.	./.:0:.,.
MockRefGenome	143924	.	T	C	.	PASS	AC=6;AF=0.030;DP=682;AV=17.10;NS=21	GT:DP:AD	./.:0:.,.	0/0:54:54,0	0/0:32:32,0	0/0:46:46,0	./.:0:.,.	./.:0:.,.	0/1:12:5,7	./.:0:.,.	0/0:13:13,0	./.:0:.,.	0/1:11:7,4	./.:0:.,.	./.:0:.,.	./.:0:.,.	0/1:10:4,6	./.:0:.,.	0/0:19:19,0	0/0:16:16,0	./.:0:.,.	0/1:17:7,10	./.:0:.,.	0/1:8:4,4	./.:0:.,.	./.:0:.,.	./.:0:.,.	0/0:11:11,0	./.:0:.,.	0/0:18:18,0	./.:0:.,.	0/0:10:10,0	0/0:15:15,0	./.:0:.,.	./.:0:.,.	./.:0:.,.	./.:0:.,.	./.:0:.,.	./.:0:.,.	./.:0:.,.	./.:0:.,.	./.:0:.,.	./.:0:.,.
MockRefGenome	143939	.	C	T	.	PASS	AC=9;AF=0.045;DP=678;AV=16.39;NS=23	GT:DP:AD	./.:0:.,.	0/0:52:52,0	0/0:32:32,0	1/1:46:0,46	./.:0:.,.	./.:0:.,.	0/0:12:12,0	./.:0:.,.	0/0:13:13,0	0/0:12:12,0	0/0:11:11,0	./.:0:.,.	./.:0:.,.	./.:0:.,.	0/0:10:10,0	./.:0:.,.	0/0:19:19,0	0/0:16:16,0	./.:0:.,.	0/0:17:17,0	./.:0:.,.	./.:0:.,.	./.:0:.,.	./.:0:.,.	./.:0:.,.	0/0:11:11,0	./.:0:.,.	0/0:18:18,0	./.:0:.,.	0/0:10:10,0	0/0:15:15,0	./.:0:.,.	./.:0:.,.	./.:0:.,.	./.:0:.,.	./.:0:.,.	./.:0:.,.	./.:0:.,.	./.:0:.,.	0/1:9:3,6	./.:0:.,.
MockRefGenome	143951	.	G	C	.	PASS	AC=8;AF=0.040;DP=676;AV=16.22;NS=23	GT:DP:AD	./.:0:.,.	0/0:52:52,0	0/0:32:32,0	0/0:46:46,0	./.:0:.,.	./.:0:.,.	0/0:12:12,0	./.:0:.,.	1/1:13:0,13	0/0:12:12,0	0/0:11:11,0	0/1:6:3,3	./.:0:.,.	./.:0:.,.	0/1:10:4,6	./.:0:.,.	0/0:19:19,0	0/0:16:16,0	./.:0:.,.	0/0:17:17,0	./.:0:.,.	./.:0:.,.	./.:0:.,.	./.:0:.,.	./.:0:.,.	0/1:11:8,3	0/1:8:3,5	0/0:18:18,0	./.:0:.,.	0/0:10:10,0	0/1:14:7,7	./.:0:.,.	./.:0:.,.	./.:0:.,.	./.:0:.,.	./.:0:.,.	./.:0:.,.	./.:0:.,.	./.:0:.,.	./.:0:.,.	./.:0:.,.
MockRefGenome	144025	.	C	G	.	PASS	AC=6;AF=0.030;DP=724;AV=16.52;NS=25	GT:DP:AD	./.:0:.,.	0/0:51:51,0	0/0:31:31,0	0/0:46:46,0	./.:0:.,.	./.:0:.,.	0/0:11:11,0	./.:0:.,.	0/0:12:12,0	0/0:12:12,0	0/0:12:12,0	./.:0:.,.	./.:0:.,.	./.:0:.,.	0/0:10:10,0	./.:0:.,.	0/0:18:18,0	0/0:15:15,0	./.:0:.,.	0/0:17:17,0	./.:0:.,.	./.:0:.,.	./.:0:.,.	./.:0:.,.	./.:0:.,.	0/0:10:10,0	./.:0:.,.	0/0:18:18,0	1/1:13:0,13	0/1:10:5,5	0/0:14:14,0	0/1:8:5,3	./.:0:.,.	./.:0:.,.	./.:0:.,.	1/1:17:0,17	./.:0:.,.	./.:0:.,.	./.:0:.,.	./.:0:.,.	./.:0:.,.
MockRefGenome	144060	.	G	A	.	PASS	AC=15;AF=0.075;DP=746;AV=15.85;NS=27	GT:DP:AD	./.:0:.,.	0/1:52:8,44	0/0:32:32,0	0/0:47:47,0	./.:0:.,.	./.:0:.,.	0/0:11:11,0	./.:0:.,.	0/0:14:14,0	./.:0:.,.	0/1:12:4,8	./.:0:.,.	./.:0:.,.	0/1:9:4,5	0/0:10:10,0	0/1:8:3,5	1/1:18:0,18	0/1:16:13,3	./.:0:.,.	0/0:17:17,0	./.:0:.,.	./.:0:.,.	./.:0:.,.	./.:0:.,.	./.:0:.,.	0/0:10:10,0	0/0:11:11,0	0/0:18:18,0	1/1:13:0,13	0/0:10:10,0	0/0:15:15,0	0/1:8:3,5	./.:0:.,.	./.:0:.,.	./.:0:.,.	0/1:17:5,12	./.:0:.,.	./.:0:.,.	./.:0:.,.	./.:0:.,.	./.:0:.,.
MockRefGenome	144112	.	C	T	.	PASS	AC=8;AF=0.040;DP=764;AV=17.00;NS=25	GT:DP:AD	./.:0:.,.	1/1:54:0,54	0/0:32:32,0	0/0:47:47,0	./.:0:.,.	./.:0:.,.	0/0:12:12,0	./.:0:.,.	0/0:14:14,0	./.:0:.,.	0/1:12:5,7	./.:0:.,.	./.:0:.,.	./.:0:.,.	0/0:10:10,0	0/1:8:3,5	0/0:18:18,0	0/1:16:7,9	./.:0:.,.	0/0:17:17,0	./.:0:.,.	./.:0:.,.	./.:0:.,.	./.:0:.,.	./.:0:.,.	0/0:11:11,0	0/0:11:11,0	0/0:18:18,0	0/0:13:13,0	0/0:10:10,0	0/0:15:15,0	./.:0:.,.	./.:0:.,.	./.:0:.,.	./.:0:.,.	0/0:20:20,0	./.:0:.,.	./.:0:.,.	./.:0:.,.	./.:0:.,.	./.:0:.,.
MockRefGenome	144115	.	G	A	.	PASS	AC=13;AF=0.065;DP=764;AV=16.52;NS=27	GT:DP:AD	./.:0:.,.	0/0:54:54,0	0/0:32:32,0	0/0:47:47,0	./.:0:.,.	./.:0:.,.	0/1:12:7,5	./.:0:.,.	1/1:14:0,14	0/0:12:12,0	0/1:12:8,4	./.:0:.,.	./.:0:.,.	./.:0:.,.	0/1:10:6,4	./.:0:.,.	0/0:18:18,0	0/0:16:16,0	./.:0:.,.	0/0:17:17,0	./.:0:.,.	0/1:8:5,3	./.:0:.,.	./.:0:.,.	./.:0:.,.	0/0:11:11,0	0/0:11:11,0	0/0:18:18,0	0/0:13:13,0	1/1:10:0,10	0/0:15:15,0	./.:0:.,.	./.:0:.,.	./.:0:.,.	./.:0:.,.	0/1:20:14,6	./.:0:.,.	./.:0:.,.	./.:0:.,.	./.:0:.,.	./.:0:.,.
MockRefGenome	145711	.	T	C	.	PASS	AC=7;AF=0.035;DP=665;AV=23.50;NS=26	GT:DP:AD	./.:0:.,.	0/0:51:51,0	0/0:37:37,0	./.:0:.,.	0/0:24:24,0	./.:0:.,.	./.:0:.,.	./.:0:.,.	1/1:50:0,50	./.:0:.,.	./.:0:.,.	./.:0:.,.	./.:0:.,.	./.:0:.,.	0/0:28:28,0	./.:0:.,.	./.:0:.,.	./.:0:.,.	./.:0:.,.	./.:0:.,.	0/0:11:11,0	./.:0:.,.	0/0:10:10,0	0/0:18:18,0	./.:0:.,.	0/0:11:11,0	0/1:31:18,13	0/0:31:31,0	0/0:28:28,0	0/0:21:21,0	0/1:36:19,17	0/0:31:31,0	0/1:15:12,3	0/0:25:25,0	0/0:31:31,0	0/0:12:12,0	./.:0:.,.	0/1:17:8,9	./.:0:.,.	./.:0:.,.	./.:0:.,.
MockRefGenome	145712	.	G	A	.	PASS	AC=6;AF=0.030;DP=665;AV=23.22;NS=27	GT:DP:AD	./.:0:.,.	0/0:51:51,0	0/0:37:37,0	./.:0:.,.	1/1:24:0,24	./.:0:.,.	./.:0:.,.	./.:0:.,.	0/0:50:50,0	./.:0:.,.	./.:0:.,.	./.:0:.,.	./.:0:.,.	./.:0:.,.	0/0:28:28,0	./.:0:.,.	./.:0:.,.	./.:0:.,.	./.:0:.,.	./.:0:.,.	0/0:11:11,0	./.:0:.,.	0/0:10:10,0	0/0:18:18,0	./.:0:.,.	0/0:11:11,0	0/0:31:31,0	0/0:31:31,0	0/1:28:16,12	1/1:21:1,20	0/0:36:36,0	0/0:31:31,0	0/0:15:15,0	0/0:25:25,0	0/0:31:31,0	0/0:12:12,0	./.:0:.,.	0/0:17:17,0	./.:0:.,.	./.:0:.,.	./.:0:.,.
MockRefGenome	145755	.	T	A	.	PASS	AC=5;AF=0.025;DP=680;AV=23.44;NS=27	GT:DP:AD	./.:0:.,.	0/0:52:52,0	0/0:37:37,0	./.:0:.,.	0/0:24:24,0	./.:0:.,.	./.:0:.,.	./.:0:.,.	0/0:50:50,0	./.:0:.,.	./.:0:.,.	./.:0:.,.	./.:0:.,.	./.:0:.,.	0/0:28:28,0	./.:0:.,.	./.:0:.,.	./.:0:.,.	./.:0:.,.	./.:0:.,.	0/0:11:11,0	./.:0:.,.	0/0:10:10,0	0/0:18:18,0	./.:0:.,.	0/0:11:11,0	0/0:31:31,0	1/1:31:0,31	0/0:30:30,0	0/0:21:21,0	0/0:36:36,0	0/0:32:32,0	0/1:15:12,3	0/0:25:25,0	0/0:31:31,0	0/0:12:12,0	./.:0:.,.	0/0:17:17,0	./.:0:.,.	./.:0:.,.	./.:0:.,.
MockRefGenome	145825	.	A	G	.	PASS	AC=33;AF=0.165;DP=1478;AV=18.68;NS=66	GT:DP:AD	0/1:27:16,11	0/0:84:84,0	0/0:22:22,0	0/1:105:56,49	./.:0:.,.	0/0:13:13,0	0/0:10:10,0	0/0:12:12,0	0/0:18:18,0	0/0:14:14,0	0/0:19:19,0	0/0:11:11,0	0/0:12:12,0	0/0:20:20,0	./.:0:.,.	0/0:14:14,0	0/0:20:20,0	0/0:17:17,0	0/0:12:12,0	0/0:10:10,0	./.:0:.,.	./.:0:.,.	0/0:26:26,0	./.:0:.,.	0/0:14:14,0	./.:0:.,.	0/0:13:13,0	0/0:12:12,0	0/0:12:12,0	0/0:17:17,0	./.:0:.,.	0/0:15:15,0	0/0:11:11,0	0/0:18:18,0	0/0:13:13,0	0/0:14:14,0	0/0:17:17,0	./.:0:.,.	./.:0:.,.	0/1:37:29,8	./.:0:.,.
MockRefGenome	145828	.	T	C	.	PASS	AC=17;AF=0.085;DP=1478;AV=18.41;NS=70	GT:DP:AD	0/0:27:27,0	0/1:84:50,34	0/0:22:22,0	0/0:105:105,0	./.:0:.,.	0/0:13:13,0	0/0:10:10,0	1/1:12:0,12	0/0:18:18,0	./.:0:.,.	0/1:19:9,10	0/0:11:11,0	0/0:12:12,0	0/1:20:6,14	./.:0:.,.	./.:0:.,.	0/1:20:8,12	0/1:17:3,14	0/0:12:12,0	0/0:10:10,0	0/0:17:17,0	./.:0:.,.	0/0:26:26,0	./.:0:.,.	0/0:14:14,0	./.:0:.,.	0/0:13:13,0	0/0:12:12,0	0/0:12:12,0	0/0:17:17,0	./.:0:.,.	0/0:15:15,0	0/0:11:11,0	0/0:18:18,0	0/0:13:13,0	0/0:14:14,0	0/0:17:17,0	./.:0:.,.	./.:0:.,.	0/0:37:37,0	0/0:10:10,0
MockRefGenome	145831	.	C	G	.	PASS	AC=35;AF=0.175;DP=1478;AV=18.63;NS=68	GT:DP:AD	0/1:27:16,11	0/0:84:84,0	0/0:22:22,0	0/1:105:56,49	./.:0:.,.	0/0:13:13,0	0/0:10:10,0	0/0:12:12,0	0/0:18:18,0	0/0:14:14,0	0/0:19:19,0	0/0:11:11,0	0/0:12:12,0	0/0:20:20,0	./.:0:.,.	0/0:14:14,0	0/0:20:20,0	0/0:17:17,0	0/0:12:12,0	0/0:10:10,0	0/0:17:17,0	./.:0:.,.	0/0:26:26,0	./.:0:.,.	0/0:14:14,0	./.:0:.,.	0/0:13:13,0	0/0:12:12,0	0/0:12:12,0	0/0:17:17,0	./.:0:.,.	0/0:15:15,0	0/0:11:11,0	0/0:18:18,0	0/0:13:13,0	0/0:14:14,0	0/0:17:17,0	./.:0:.,.	./.:0:.,.	0/1:37:29,8	./.:0:.,.
MockRefGenome	145909	.	C	T	.	PASS	AC=19;AF=0.095;DP=1427;AV=18.13;NS=68	GT:DP:AD	0/0:25:25,0	0/0:82:82,0	1/1:21:0,21	0/0:104:104,0	./.:0:.,.	1/1:13:0,13	0/0:10:10,0	0/0:10:10,0	0/0:18:18,0	0/0:14:14,0	0/0:19:19,0	0/1:10:5,5	0/0:12:12,0	0/0:18:18,0	./.:0:.,.	0/0:14:14,0	0/0:18:18,0	0/0:17:17,0	0/1:12:5,7	0/1:9:4,5	./.:0:.,.	0/1:7:4,3	0/1:25:10,15	./.:0:.,.	0/1:12:5,7	./.:0:.,.	0/0:13:13,0	0/0:12:12,0	0/0:12:12,0	0/0:16:16,0	./.:0:.,.	0/1:14:8,6	0/0:11:11,0	0/0:17:17,0	0/0:13:13,0	0/0:12:12,0	0/0:17:17,0	./.:0:.,.	./.:0:.,.	0/0:35:35,0	0/1:10:5,5
MockRefGenome	145933	.	C	T	.	PASS	AC=35;AF=0.175;DP=1407;AV=18.33;NS=64	GT:DP:AD	0/1:24:16,8	0/0:80:80,0	0/0:21:21,0	0/1:104:55,49	./.:0:.,.	0/0:13:13,0	0/0:10:10,0	0/0:10:10,0	0/0:18:18,0	0/0:14:14,0	0/0:19:19,0	0/0:10:10,0	0/0:12:12,0	0/0:17:17,0	./.:0:.,.	0/0:14:14,0	0/0:18:18,0	0/0:17:17,0	0/0:12:12,0	./.:0:.,.	0/0:16:16,0	./.:0:.,.	0/0:24:24,0	./.:0:.,.	0/0:12:12,0	./.:0:.,.	0/0:13:13,0	0/0:12:12,0	0/0:12:12,0	0/0:16:16,0	./.:0:.,.	0/0:14:14,0	0/0:11:11,0	0/0:17:17,0	0/0:13:13,0	0/0:12:12,0	0/0:17:17,0	./.:0:.,.	./.:0:.,.	0/1:34:28,6	./.:0:.,.
MockRefGenome	145986	.	C	T	.	PASS	AC=13;AF=0.065;DP=1295;AV=17.95;NS=57	GT:DP:AD	0/0:25:25,0	0/0:75:75,0	0/0:21:21,0	0/1:100:45,55	./.:0:.,.	0/0:12:12,0	0/0:10:10,0	0/0:10:10,0	0/0:18:18,0	0/0:14:14,0	0/0:18:18,0	0/0:10:10,0	0/0:12:12,0	0/0:16:16,0	./.:0:.,.	0/0:13:13,0	0/0:18:18,0	0/0:14:14,0	./.:0:.,.	./.:0:.,.	0/0:17:17,0	./.:0:.,.	0/0:23:23,0	./.:0:.,.	0/0:13:13,0	./.:0:.,.	0/0:11:11,0	./.:0:.,.	0/0:12:12,0	0/0:17:17,0	./.:0:.,.	0/0:15:15,0	0/0:11:11,0	0/0:15:15,0	0/0:13:13,0	0/0:14:14,0	0/0:16:16,0	./.:0:.,.	./.:0:.,.	0/0:32:32,0	0/0:10:10,0
MockRefGenome	146003	.	C	G	.	PASS	AC=27;AF=0.135;DP=1319;AV=17.90;NS=60	GT:DP:AD	0/1:25:16,9	0/0:78:78,0	0/0:21:21,0	0/1:101:55,46	./.:0:.,.	0/0:13:13,0	0/0:10:10,0	0/0:10:10,0	0/0:18:18,0	0/0:14:14,0	0/0:19:19,0	0/0:10:10,0	0/0:12:12,0	0/0:18:18,0	./.:0:.,.	0/0:13:13,0	0/0:20:20,0	0/0:16:16,0	./.:0:.,.	./.:0:.,.	0/0:17:17,0	./.:0:.,.	0/0:24:24,0	./.:0:.,.	0/0:13:13,0	./.:0:.,.	0/0:11:11,0	0/0:11:11,0	0/0:12:12,0	0/0:17:17,0	./.:0:.,.	0/0:15:15,0	0/0:11:11,0	0/0:16:16,0	0/0:13:13,0	0/0:14:14,0	0/0:17:17,0	./.:0:.,.	./.:0:.,.	0/1:32:26,6	./.:0:.,.
MockRefGenome	146030	.	C	G	.	PASS	AC=27;AF=0.135;DP=1332;AV=17.97;NS=61	GT:DP:AD	0/1:26:16,10	0/0:80:80,0	0/0:21:21,0	0/1:101:55,46	./.:0:.,.	0/0:13:13,0	0/0:10:10,0	0/0:12:12,0	0/0:18:18,0	0/0:14:14,0	0/0:19:19,0	0/0:10:10,0	0/0:12:12,0	0/0:19:19,0	./.:0:.,.	0/0:13:13,0	0/0:20:20,0	0/0:16:16,0	./.:0:.,.	./.:0:.,.	0/0:17:17,0	./.:0:.,.	0/0:24:24,0	./.:0:.,.	0/0:13:13,0	./.:0:.,.	0/0:12:12,0	0/0:11:11,0	0/0:12:12,0	0/0:17:17,0	./.:0:.,.	0/0:15:15,0	0/0:11:11,0	0/0:17:17,0	0/0:13:13,0	0/0:14:14,0	0/0:17:17,0	./.:0:.,.	./.:0:.,.	0/1:32:26,6	./.:0:.,.
MockRefGenome	146033	.	G	A	.	PASS	AC=11;AF=0.055;DP=1340;AV=17.76;NS=63	GT:DP:AD	0/0:26:26,0	0/0:81:81,0	1/1:21:0,21	0/0:101:101,0	./.:0:.,.	1/1:13:0,13	0/0:10:10,0	0/0:12:12,0	0/0:18:18,0	0/0:14:14,0	0/0:19:19,0	0/0:10:10,0	0/0:12:12,0	0/0:18:18,0	./.:0:.,.	0/0:14:14,0	0/0:20:20,0	0/0:16:16,0	./.:0:.,.	0/1:9:4,5	./.:0:.,.	./.:0:.,.	0/1:24:9,15	./.:0:.,.	0/1:13:5,8	./.:0:.,.	0/0:12:12,0	0/0:11:11,0	0/0:12:12,0	0/0:17:17,0	./.:0:.,.	0/0:15:15,0	0/0:11:11,0	0/0:17:17,0	0/0:13:13,0	0/0:14:14,0	0/0:17:17,0	./.:0:.,.	./.:0:.,.	0/0:32:32,0	0/1:10:5,5
MockRefGenome	146042	.	G	A	.	PASS	AC=11;AF=0.055;DP=1343;AV=17.94;NS=63	GT:DP:AD	0/0:26:26,0	0/1:81:41,40	0/0:21:21,0	0/0:101:101,0	./.:0:.,.	0/0:13:13,0	0/0:10:10,0	0/1:12:8,4	0/0:18:18,0	0/1:14:11,3	0/0:19:19,0	0/0:10:10,0	0/1:12:8,4	1/1:19:0,19	./.:0:.,.	0/1:14:6,8	0/0:20:20,0	0/1:16:13,3	./.:0:.,.	./.:0:.,.	0/0:17:17,0	./.:0:.,.	0/0:24:24,0	./.:0:.,.	0/0:13:13,0	./.:0:.,.	0/0:12:12,0	0/0:11:11,0	0/0:12:12,0	0/0:17:17,0	./.:0:.,.	0/0:15:15,0	0/0:11:11,0	0/0:17:17,0	0/0:13:13,0	0/0:14:14,0	0/1:17:9,8	./.:0:.,.	./.:0:.,.	0/0:32:32,0	0/0:10:10,0
MockRefGenome	146054	.	G	C	.	PASS	AC=25;AF=0.125;DP=1353;AV=18.23;NS=61	GT:DP:AD	0/1:26:16,10	0/0:81:81,0	0/0:21:21,0	0/1:101:55,46	./.:0:.,.	0/0:13:13,0	0/0:10:10,0	0/0:12:12,0	0/0:18:18,0	0/0:14:14,0	0/0:19:19,0	0/0:10:10,0	0/0:12:12,0	0/0:20:20,0	./.:0:.,.	0/0:14:14,0	0/0:20:20,0	0/0:16:16,0	./.:0:.,.	./.:0:.,.	0/0:17:17,0	./.:0:.,.	0/0:24:24,0	./.:0:.,.	0/0:13:13,0	./.:0:.,.	0/0:13:13,0	0/0:11:11,0	0/0:12:12,0	0/0:17:17,0	./.:0:.,.	0/0:15:15,0	0/0:11:11,0	0/0:18:18,0	0/0:13:13,0	0/0:14:14,0	0/0:18:18,0	./.:0:.,.	./.:0:.,.	0/1:32:26,6	./.:0:.,.
MockRefGenome	146112	.	G	C	.	PASS	AC=50;AF=0.250;DP=1407;AV=18.62;NS=61	GT:DP:AD	0/1:27:11,16	0/1:84:60,24	0/0:22:22,0	0/1:104:49,55	./.:0:.,.	./.:0:.,.	1/1:10:0,10	0/1:12:6,6	1/1:18:0,18	0/1:14:10,4	0/1:19:14,5	0/1:11:6,5	0/1:12:4,8	0/0:20:20,0	./.:0:.,.	0/1:14:8,6	0/1:20:8,12	0/1:17:9,8	./.:0:.,.	0/1:10:6,4	0/1:17:5,12	0/1:7:3,4	0/1:26:19,7	./.:0:.,.	0/0:14:14,0	./.:0:.,.	0/1:13:9,4	0/0:12:12,0	1/1:12:0,12	1/1:17:0,17	./.:0:.,.	1/1:15:0,15	./.:0:.,.	0/1:18:15,3	1/1:13:0,13	1/1:14:0,14	0/1:18:9,9	./.:0:.,.	./.:0:.,.	0/1:37:23,14	0/0:10:10,0
MockRefGenome	146113	.	A	T	.	PASS	AC=50;AF=0.250;DP=1407;AV=18.62;NS=61	GT:DP:AD	0/1:27:11,16	0/1:84:60,24	0/0:22:22,0	0/1:104:49,55	./.:0:.,.	./.:0:.,.	1/1:10:0,10	0/1:12:6,6	1/1:18:0,18	0/1:14:10,4	0/1:19:14,5	0/1:11:6,5	0/1:12:4,8	0/0:20:20,0	./.:0:.,.	0/1:14:8,6	0/1:20:8,12	0/1:17:9,8	./.:0:.,.	0/1:10:6,4	0/1:17:5,12	0/1:7:3,4	0/1:26:19,7	./.:0:.,.	0/0:14:14,0	./.:0:.,.	0/1:13:9,4	0/0:12:12,0	1/1:12:0,12	1/1:17:0,17	./.:0:.,.	1/1:15:0,15	./.:0:.,.	0/1:18:15,3	1/1:13:0,13	1/1:14:0,14	0/1:18:9,9	./.:0:.,.	./.:0:.,.	0/1:37:23,14	0/0:10:10,0
MockRefGenome	146114	.	T	C	.	PASS	AC=50;AF=0.250;DP=1407;AV=18.62;NS=61	GT:DP:AD	0/1:27:11,16	0/1:84:60,24	0/0:22:22,0	0/1:104:49,55	./.:0:.,.	./.:0:.,.	1/1:10:0,10	0/1:12:6,6	1/1:18:0,18	0/1:14:10,4	0/1:19:14,5	0/1:11:6,5	0/1:12:4,8	0/0:20:20,0	./.:0:.,.	0/1:14:8,6	0/1:20:8,12	0/1:17:9,8	./.:0:.,.	0/1:10:6,4	0/1:17:5,12	0/1:7:3,4	0/1:26:19,7	./.:0:.,.	0/0:14:14,0	./.:0:.,.	0/1:13:9,4	0/0:12:12,0	1/1:12:0,12	1/1:17:0,17	./.:0:.,.	1/1:15:0,15	./.:0:.,.	0/1:18:15,3	1/1:13:0,13	1/1:14:0,14	0/1:18:9,9	./.:0:.,.	./.:0:.,.	0/1:37:23,14	0/0:10:10,0
MockRefGenome	146337	.	C	T	.	PASS	AC=9;AF=0.045;DP=1095;AV=17.04;NS=46	GT:DP:AD	0/0:18:18,0	0/0:41:41,0	0/0:22:22,0	0/0:50:50,0	./.:0:.,.	./.:0:.,.	0/0:12:12,0	./.:0:.,.	0/0:38:38,0	./.:0:.,.	./.:0:.,.	0/0:22:22,0	./.:0:.,.	0/1:21:12,9	0/0:20:20,0	./.:0:.,.	./.:0:.,.	0/1:16:9,7	./.:0:.,.	0/0:14:14,0	0/0:15:15,0	0/0:12:12,0	./.:0:.,.	0/0:10:10,0	./.:0:.,.	./.:0:.,.	./.:0:.,.	0/0:17:17,0	./.:0:.,.	0/0:16:16,0	0/0:15:15,0	./.:0:.,.	0/0:12:12,0	0/0:11:11,0	./.:0:.,.	./.:0:.,.	0/1:14:8,6	0/0:16:16,0	0/0:12:12,0	0/0:15:15,0	0/0:17:17,0
MockRefGenome	146352	.	G	T	.	PASS	AC=13;AF=0.065;DP=1100;AV=16.55;NS=49	GT:DP:AD	0/0:18:18,0	0/1:41:17,24	0/0:22:22,0	0/0:50:50,0	./.:0:.,.	./.:0:.,.	0/0:12:12,0	0/1:8:4,4	0/0:38:38,0	./.:0:.,.	./.:0:.,.	0/0:22:22,0	./.:0:.,.	0/1:21:12,9	0/0:20:20,0	0/1:6:3,3	./.:0:.,.	0/1:16:9,7	./.:0:.,.	0/0:14:14,0	0/0:16:16,0	0/0:12:12,0	./.:0:.,.	0/0:10:10,0	./.:0:.,.	./.:0:.,.	./.:0:.,.	0/0:17:17,0	./.:0:.,.	0/0:16:16,0	0/0:15:15,0	./.:0:.,.	0/0:12:12,0	0/1:11:6,5	./.:0:.,.	./.:0:.,.	0/1:14:4,10	0/0:16:16,0	0/0:12:12,0	0/0:15:15,0	0/0:17:17,0
MockRefGenome	146403	.	A	G	.	PASS	AC=15;AF=0.075;DP=1163;AV=17.55;NS=49	GT:DP:AD	0/0:18:18,0	0/1:41:30,11	0/1:24:14,10	0/0:51:51,0	./.:0:.,.	./.:0:.,.	1/1:14:0,14	./.:0:.,.	0/1:40:21,19	./.:0:.,.	0/0:14:14,0	0/0:22:22,0	./.:0:.,.	0/1:23:18,5	0/0:21:21,0	./.:0:.,.	0/0:14:14,0	0/0:18:18,0	./.:0:.,.	0/0:17:17,0	0/0:16:16,0	./.:0:.,.	./.:0:.,.	0/1:10:6,4	./.:0:.,.	./.:0:.,.	./.:0:.,.	1/1:20:0,20	./.:0:.,.	0/1:16:5,11	0/1:15:10,5	./.:0:.,.	0/1:14:10,4	0/0:12:12,0	./.:0:.,.	./.:0:.,.	0/0:15:15,0	0/0:16:16,0	0/0:13:13,0	./.:0:.,.	0/0:18:18,0
MockRefGenome	147502	.	G	A	.	PASS	AC=14;AF=0.070;DP=1248;AV=20.21;NS=42	GT:DP:AD	0/0:36:36,0	0/0:123:123,0	0/0:18:18,0	0/1:27:24,3	0/1:16:13,3	0/0:16:16,0	./.:0:.,.	./.:0:.,.	0/0:21:21,0	./.:0:.,.	0/1:16:12,4	0/0:21:21,0	0/0:15:15,0	0/0:19:19,0	0/0:15:15,0	0/0:11:11,0	0/1:17:13,4	0/1:23:16,7	./.:0:.,.	./.:0:.,.	0/0:14:14,0	0/0:10:10,0	./.:0:.,.	./.:0:.,.	0/0:10:10,0	0/0:14:14,0	0/0:20:20,0	0/0:31:31,0	0/1:18:13,5	./.:0:.,.	0/0:22:22,0	0/0:10:10,0	./.:0:.,.	0/1:12:7,5	0/0:34:34,0	0/0:25:25,0	./.:0:.,.	./.:0:.,.	./.:0:.,.	./.:0:.,.	./.:0:.,.
MockRefGenome	147813	.	C	G	.	PASS	AC=31;AF=0.155;DP=1220;AV=16.24;NS=59	GT:DP:AD	0/0:14:14,0	0/1:52:44,8	0/1:22:13,9	0/0:41:41,0	0/0:17:17,0	0/1:17:8,9	1/1:17:0,17	0/1:9:3,6	0/0:37:37,0	0/1:17:13,4	0/1:11:5,6	1/1:13:0,13	./.:0:.,.	0/0:17:17,0	1/1:11:0,11	0/1:13:10,3	./.:0:.,.	./.:0:.,.	0/1:10:4,6	0/0:13:13,0	0/1:11:6,5	0/0:12:12,0	0/0:23:23,0	0/0:13:13,0	0/1:19:13,6	./.:0:.,.	1/1:18:0,18	0/0:22:22,0	0/1:19:10,9	0/0:22:22,0	0/0:17:17,0	./.:0:.,.	0/1:17:13,4	0/1:27:23,4	0/0:14:14,0	0/0:10:10,0	0/1:17:9,8	0/0:14:14,0	0/1:11:4,7	./.:0:.,.	./.:0:.,.
MockRefGenome	147829	.	G	A	.	PASS	AC=15;AF=0.075;DP=1221;AV=15.73;NS=63	GT:DP:AD	0/0:14:14,0	0/1:52:8,44	0/0:22:22,0	0/0:41:40,1	0/0:17:17,0	./.:0:.,.	0/0:17:17,0	0/1:9:6,3	0/0:37:37,0	0/1:17:10,7	0/1:11:6,5	0/0:13:13,0	./.:0:.,.	1/1:17:0,17	0/0:11:11,0	0/1:13:3,10	./.:0:.,.	./.:0:.,.	0/0:10:10,0	0/0:13:13,0	0/0:11:11,0	0/0:12:12,0	0/0:23:23,0	0/0:13:13,0	0/0:19:19,0	./.:0:.,.	0/0:18:18,0	0/0:22:22,0	0/0:19:19,0	0/0:22:22,0	0/0:17:17,0	./.:0:.,.	0/0:17:17,0	0/0:27:27,0	0/0:14:14,0	0/0:10:10,0	0/1:17:9,8	0/0:14:14,0	0/0:11:11,0	0/0:12:12,0	./.:0:.,.
MockRefGenome	147875	.	G	A	.	PASS	AC=62;AF=0.310;DP=1198;AV=15.72;NS=60	GT:DP:AD	1/1:14:14,0	1/0:51:8,43	1/0:21:8,13	1/1:39:38,1	0/0:17:0,17	1/0:15:9,6	1/1:17:17,0	1/0:8:5,3	0/0:36:0,36	1/0:17:4,13	1/0:11:6,5	1/1:13:13,0	./.:0:.,.	0/0:17:0,17	1/1:10:10,0	1/0:13:3,10	./.:0:.,.	./.:0:.,.	1/0:10:6,4	0/0:12:0,12	1/0:10:4,6	0/0:12:0,12	1/0:23:8,15	0/0:12:0,12	1/0:19:6,13	./.:0:.,.	1/0:18:10,8	0/0:21:0,21	1/0:17:9,8	0/0:22:0,22	0/0:16:0,16	./.:0:.,.	1/0:17:4,13	1/0:26:4,22	0/0:14:0,14	0/0:10:0,10	1/0:17:8,9	1/0:14:7,7	1/1:10:10,0	1/0:12:5,7	1/0:9:6,3
MockRefGenome	147881	.	T	C	.	PASS	AC=28;AF=0.140;DP=1194;AV=16.03;NS=58	GT:DP:AD	0/0:14:14,0	0/0:51:51,0	0/0:21:21,0	0/0:39:39,0	1/1:17:0,17	0/0:15:15,0	0/0:17:17,0	./.:0:.,.	0/0:36:35,1	0/0:17:17,0	0/0:11:11,0	0/0:13:13,0	./.:0:.,.	0/0:17:17,0	0/0:10:10,0	0/0:13:13,0	./.:0:.,.	./.:0:.,.	0/1:10:6,4	1/1:12:0,12	0/1:10:4,6	0/1:11:3,8	0/0:23:23,0	0/1:12:7,5	0/1:19:6,13	./.:0:.,.	0/0:18:18,0	0/1:21:11,10	0/1:17:9,8	1/1:22:0,22	0/0:16:16,0	./.:0:.,.	0/1:17:4,13	0/1:26:6,20	1/1:14:0,14	1/1:10:0,10	0/0:17:17,0	0/1:14:9,5	0/0:10:10,0	0/0:12:12,0	./.:0:.,.
MockRefGenome	147882	.	A	T	.	PASS	AC=28;AF=0.140;DP=1195;AV=15.46;NS=59	GT:DP:AD	0/0:14:14,0	0/1:51:8,43	0/1:21:8,13	0/0:39:38,1	0/0:17:17,0	0/1:15:9,6	0/0:17:17,0	0/1:8:5,3	1/1:36:1,35	0/1:17:10,7	0/1:11:6,5	0/0:13:13,0	./.:0:.,.	1/1:17:0,17	0/0:10:10,0	0/1:13:3,10	./.:0:.,.	./.:0:.,.	0/0:10:10,0	0/0:12:12,0	0/0:10:10,0	0/1:11:8,3	0/1:23:8,15	0/1:12:5,7	0/0:19:19,0	./.:0:.,.	0/0:18:18,0	0/1:21:10,11	0/0:17:17,0	0/0:22:22,0	1/1:16:0,16	./.:0:.,.	0/0:17:17,0	./.:0:.,.	0/0:14:14,0	0/0:10:10,0	0/1:17:9,8	./.:0:.,.	0/0:10:10,0	0/1:12:5,7	0/1:9:6,3
MockRefGenome	147895	.	C	T	.	PASS	AC=10;AF=0.050;DP=1179;AV=15.95;NS=57	GT:DP:AD	0/0:14:14,0	0/0:51:51,0	0/0:21:21,0	0/1:39:15,24	0/0:17:17,0	0/0:15:15,0	0/0:15:15,0	./.:0:.,.	0/0:36:36,0	0/0:17:17,0	0/0:11:11,0	0/0:13:13,0	./.:0:.,.	0/0:16:16,0	0/0:10:10,0	0/0:13:13,0	./.:0:.,.	./.:0:.,.	./.:0:.,.	0/0:12:12,0	0/0:10:10,0	0/0:11:11,0	0/0:23:23,0	0/0:12:12,0	0/0:19:19,0	./.:0:.,.	0/0:18:18,0	0/0:21:21,0	0/0:17:17,0	0/0:21:21,0	0/0:16:16,0	./.:0:.,.	0/0:17:17,0	0/0:26:26,0	0/0:14:14,0	./.:0:.,.	0/0:17:17,0	0/0:13:13,0	0/0:10:10,0	0/0:12:12,0	./.:0:.,.
MockRefGenome	147897	.	G	A	.	PASS	AC=18;AF=0.090;DP=1177;AV=16.31;NS=54	GT:DP:AD	0/0:14:14,0	0/0:51:51,0	0/1:21:13,8	0/0:39:39,0	0/0:17:17,0	0/1:15:6,9	1/1:15:0,15	./.:0:.,.	0/0:36:36,0	0/0:17:17,0	0/0:11:11,0	1/1:13:0,13	./.:0:.,.	0/0:16:16,0	1/1:10:0,10	0/0:13:13,0	./.:0:.,.	./.:0:.,.	./.:0:.,.	0/0:12:12,0	0/1:10:6,4	0/0:11:11,0	0/0:22:22,0	0/0:12:12,0	0/1:19:13,6	./.:0:.,.	0/1:18:8,10	0/0:21:21,0	0/1:17:8,9	0/0:21:21,0	0/0:16:16,0	./.:0:.,.	0/1:17:13,4	0/0:26:26,0	0/0:14:14,0	./.:0:.,.	0/0:17:17,0	0/0:13:13,0	0/1:10:3,7	0/0:12:12,0	./.:0:.,.
MockRefGenome	147926	.	C	T	.	PASS	AC=26;AF=0.130;DP=1162;AV=15.75;NS=57	GT:DP:AD	0/0:14:14,0	0/0:51:51,0	0/0:21:21,0	0/0:37:37,0	1/1:17:0,17	0/0:15:15,0	0/0:15:15,0	./.:0:.,.	0/0:35:34,1	0/0:17:17,0	0/0:11:11,0	0/0:13:13,0	./.:0:.,.	0/0:16:16,0	0/0:10:10,0	0/0:13:13,0	./.:0:.,.	./.:0:.,.	0/1:9:5,4	1/1:11:0,11	0/1:10:4,6	0/1:11:3,8	0/0:22:22,0	0/1:12:7,5	0/1:19:6,13	./.:0:.,.	0/0:18:18,0	0/1:21:11,10	0/1:17:9,8	1/1:20:0,20	0/0:16:16,0	./.:0:.,.	0/1:17:4,13	0/1:26:6,20	1/1:14:0,14	./.:0:.,.	0/0:17:17,0	0/1:13:9,4	0/0:10:10,0	0/0:12:12,0	./.:0:.,.
MockRefGenome	147929	.	T	C	.	PASS	AC=14;AF=0.070;DP=1159;AV=15.93;NS=56	GT:DP:AD	0/0:14:14,0	0/0:51:51,0	0/1:21:8,13	0/0:37:37,0	0/0:17:17,0	0/1:15:10,5	0/0:15:15,0	./.:0:.,.	1/1:34:1,33	0/0:17:17,0	0/0:11:11,0	0/0:13:13,0	./.:0:.,.	0/0:16:16,0	0/0:10:10,0	0/0:13:13,0	./.:0:.,.	./.:0:.,.	./.:0:.,.	0/0:11:11,0	./.:0:.,.	0/1:11:8,3	0/1:22:8,14	0/1:12:5,7	0/0:19:19,0	./.:0:.,.	0/0:18:18,0	0/1:21:10,11	0/0:17:17,0	0/0:20:20,0	1/1:16:0,16	./.:0:.,.	0/0:17:17,0	0/0:26:26,0	0/0:14:14,0	./.:0:.,.	0/0:17:17,0	./.:0:.,.	0/0:10:10,0	0/1:11:4,7	0/1:9:6,3
MockRefGenome	147992	.	T	C	.	PASS	AC=15;AF=0.075;DP=1106;AV=15.36;NS=55	GT:DP:AD	0/0:13:13,0	0/0:50:50,0	0/0:21:21,0	1/1:37:1,36	0/0:15:15,0	0/0:17:17,0	0/0:13:13,0	./.:0:.,.	0/0:37:37,0	0/0:17:17,0	0/0:10:10,0	0/0:13:13,0	./.:0:.,.	0/0:14:14,0	0/0:11:11,0	0/0:12:12,0	./.:0:.,.	./.:0:.,.	./.:0:.,.	0/0:12:12,0	0/0:10:10,0	0/0:10:10,0	0/0:23:23,0	0/0:12:12,0	0/0:16:16,0	./.:0:.,.	0/0:16:16,0	0/0:20:20,0	0/0:18:18,0	0/0:20:20,0	0/0:13:13,0	./.:0:.,.	0/0:15:15,0	0/0:26:26,0	0/0:12:12,0	0/0:10:10,0	0/0:16:16,0	0/0:12:12,0	0/0:10:10,0	0/1:9:6,3	./.:0:.,.
MockRefGenome	148013	.	A	G	.	PASS	AC=16;AF=0.080;DP=1131;AV=15.64;NS=53	GT:DP:AD	0/0:13:13,0	0/1:51:8,43	0/0:21:21,0	0/0:38:37,1	0/0:15:15,0	./.:0:.,.	0/0:14:14,0	0/1:9:6,3	0/0:37:37,0	0/1:17:10,7	0/1:11:6,5	0/0:13:13,0	./.:0:.,.	1/1:14:0,14	0/0:11:11,0	0/1:13:3,10	./.:0:.,.	./.:0:.,.	./.:0:.,.	0/0:12:12,0	0/0:10:10,0	0/0:10:10,0	0/0:23:23,0	0/0:13:13,0	0/0:18:18,0	./.:0:.,.	0/0:16:16,0	0/0:21:21,0	0/0:18:18,0	0/0:20:20,0	0/0:14:14,0	./.:0:.,.	0/0:15:15,0	0/1:26:23,3	0/0:13:13,0	0/0:10:10,0	0/1:16:8,8	0/0:12:12,0	0/0:10:10,0	./.:0:.,.	./.:0:.,.
MockRefGenome	148016	.	C	A	.	PASS	AC=9;AF=0.045;DP=1138;AV=16.47;NS=51	GT:DP:AD	1/1:13:0,13	0/0:51:51,0	0/0:21:21,0	0/0:38:38,0	0/0:15:15,0	0/0:17:17,0	0/0:14:14,0	./.:0:.,.	0/0:37:37,0	0/0:17:17,0	0/0:11:11,0	0/0:13:13,0	./.:0:.,.	0/0:14:14,0	0/0:11:11,0	0/0:13:13,0	./.:0:.,.	./.:0:.,.	./.:0:.,.	0/0:12:12,0	0/0:10:10,0	0/0:10:10,0	0/0:23:23,0	0/0:13:13,0	0/0:18:18,0	./.:0:.,.	0/0:16:16,0	0/0:21:21,0	0/0:18:18,0	0/0:20:20,0	0/0:15:15,0	./.:0:.,.	0/0:15:15,0	0/0:26:26,0	0/0:13:13,0	0/0:10:10,0	0/0:16:16,0	0/1:12:6,6	./.:0:.,.	./.:0:.,.	./.:0:.,.
MockRefGenome	148027	.	G	A	.	PASS	AC=14;AF=0.070;DP=1159;AV=16.15;NS=55	GT:DP:AD	0/0:13:13,0	0/0:51:51,0	0/1:21:8,13	0/0:38:38,0	0/0:16:16,0	0/1:17:10,7	0/0:16:16,0	./.:0:.,.	1/1:37:1,36	0/0:17:17,0	0/0:11:11,0	0/0:13:13,0	./.:0:.,.	0/0:14:14,0	0/0:11:11,0	0/0:13:13,0	./.:0:.,.	./.:0:.,.	./.:0:.,.	0/0:12:12,0	0/0:10:10,0	0/1:11:8,3	0/1:23:8,15	0/1:13:5,8	./.:0:.,.	./.:0:.,.	0/0:16:16,0	0/1:22:11,11	0/0:18:18,0	0/0:22:22,0	1/1:15:0,15	./.:0:.,.	0/0:15:15,0	0/0:26:26,0	0/0:13:13,0	0/0:10:10,0	0/0:16:16,0	./.:0:.,.	./.:0:.,.	0/1:9:3,6	0/1:8:5,3
MockRefGenome	148049	.	C	T	.	PASS	AC=11;AF=0.055;DP=1180;AV=16.41;NS=56	GT:DP:AD	1/1:13:0,13	0/0:51:51,0	0/0:21:21,0	0/0:38:38,0	0/0:16:16,0	0/0:17:17,0	0/0:17:17,0	./.:0:.,.	0/0:37:37,0	0/0:17:17,0	0/0:11:11,0	0/0:13:13,0	./.:0:.,.	0/0:15:15,0	0/0:11:11,0	0/0:13:13,0	./.:0:.,.	./.:0:.,.	./.:0:.,.	0/0:13:13,0	0/0:11:11,0	0/0:11:11,0	0/0:23:23,0	0/0:13:13,0	0/0:20:20,0	./.:0:.,.	0/0:16:16,0	0/0:22:22,0	0/0:18:18,0	0/0:22:22,0	0/0:16:16,0	./.:0:.,.	0/0:15:15,0	0/0:26:26,0	0/0:14:14,0	0/0:10:10,0	0/0:16:16,0	0/1:13:7,6	./.:0:.,.	0/0:11:11,0	./.:0:.,.
MockRefGenome	148079	.	C	T	.	PASS	AC=17;AF=0.085;DP=1233;AV=16.13;NS=61	GT:DP:AD	0/0:13:13,0	0/0:52:52,0	0/0:22:22,0	1/1:41:1,40	0/0:17:17,0	0/0:18:18,0	0/0:18:18,0	0/0:10:10,0	0/0:37:37,0	0/0:17:17,0	0/0:11:11,0	0/0:13:13,0	./.:0:.,.	0/0:17:17,0	0/0:12:12,0	0/0:13:13,0	./.:0:.,.	./.:0:.,.	0/0:10:10,0	0/0:13:13,0	0/0:11:11,0	0/0:12:12,0	0/0:23:23,0	0/0:13:13,0	0/0:20:20,0	./.:0:.,.	0/0:18:18,0	0/0:22:22,0	0/0:19:19,0	0/0:22:22,0	0/0:17:17,0	./.:0:.,.	0/0:17:17,0	0/0:27:27,0	0/0:14:14,0	0/0:10:10,0	0/0:17:17,0	0/0:13:13,0	0/0:10:10,0	0/1:12:8,4	0/1:8:3,5
MockRefGenome	148088	.	G	A	.	PASS	AC=28;AF=0.140;DP=1233;AV=16.36;NS=58	GT:DP:AD	1/1:13:0,13	0/1:52:44,8	0/1:22:9,13	0/0:41:41,0	0/0:17:17,0	0/1:18:11,7	0/0:18:18,0	0/0:10:10,0	1/1:37:1,36	0/0:17:17,0	0/0:11:11,0	0/0:13:13,0	./.:0:.,.	0/0:17:17,0	0/0:12:12,0	0/1:13:10,3	./.:0:.,.	./.:0:.,.	0/0:10:10,0	0/0:13:13,0	0/0:11:11,0	0/1:12:9,3	0/1:23:8,15	0/1:13:5,8	0/0:20:20,0	./.:0:.,.	0/0:18:18,0	0/1:22:11,11	0/0:19:19,0	0/0:22:22,0	1/1:17:0,17	./.:0:.,.	0/0:17:17,0	0/0:23:23,0	0/0:14:14,0	0/0:10:10,0	./.:0:.,.	0/1:13:5,8	0/1:10:7,3	0/1:12:4,8	0/1:9:5,4
MockRefGenome	148091	.	C	T	.	PASS	AC=12;AF=0.060;DP=1235;AV=16.53;NS=60	GT:DP:AD	1/1:13:0,13	0/0:52:52,0	0/0:22:22,0	0/0:41:41,0	0/0:17:17,0	0/0:18:18,0	0/0:18:18,0	0/0:10:10,0	0/0:37:37,0	0/0:17:17,0	0/0:11:11,0	0/0:13:13,0	./.:0:.,.	0/0:17:17,0	0/0:12:12,0	0/0:13:13,0	./.:0:.,.	./.:0:.,.	0/0:10:10,0	0/0:13:13,0	0/0:11:11,0	0/0:12:12,0	0/0:23:23,0	0/0:13:13,0	0/0:20:20,0	./.:0:.,.	0/0:18:18,0	0/0:22:22,0	0/0:19:19,0	0/0:22:22,0	0/0:17:17,0	./.:0:.,.	0/0:17:17,0	0/0:27:27,0	0/0:14:14,0	0/0:10:10,0	0/0:17:17,0	0/1:13:7,6	./.:0:.,.	0/0:12:12,0	./.:0:.,.
MockRefGenome	148097	.	A	G	.	PASS	AC=41;AF=0.205;DP=1237;AV=16.13;NS=63	GT:DP:AD	0/0:13:13,0	1/1:52:0,52	0/1:22:9,13	0/0:41:40,1	0/0:17:17,0	0/1:18:10,8	0/0:18:18,0	0/1:10:7,3	1/1:37:0,37	0/1:17:10,7	0/1:11:6,5	0/0:13:13,0	./.:0:.,.	1/1:17:0,17	0/0:12:12,0	1/1:13:0,13	./.:0:.,.	./.:0:.,.	0/0:10:10,0	0/0:13:13,0	0/0:11:11,0	0/1:12:6,6	0/1:23:8,15	1/1:13:0,13	0/1:20:7,13	./.:0:.,.	0/0:18:18,0	0/1:22:11,11	0/1:19:9,10	0/0:22:22,0	1/1:17:0,17	./.:0:.,.	0/0:17:17,0	0/1:27:24,3	0/0:14:14,0	0/0:10:10,0	0/1:17:9,8	0/1:13:6,7	./.:0:.,.	0/1:12:5,7	0/1:9:6,3
MockRefGenome	149141	.	C	T	.	PASS	AC=21;AF=0.105;DP=844;AV=15.03;NS=29	GT:DP:AD	./.:0:.,.	0/0:19:19,0	1/1:17:0,17	0/0:25:25,0	./.:0:.,.	./.:0:.,.	./.:0:.,.	./.:0:.,.	0/0:16:16,0	./.:0:.,.	0/0:12:12,0	./.:0:.,.	./.:0:.,.	0/0:15:15,0	1/1:13:0,13	./.:0:.,.	0/0:12:12,0	./.:0:.,.	./.:0:.,.	0/1:10:5,5	0/1:21:7,14	1/1:12:0,12	1/1:10:0,10	./.:0:.,.	1/1:12:0,12	./.:0:.,.	./.:0:.,.	1/1:14:0,14	0/0:12:12,0	0/0:17:17,0	1/1:19:0,19	./.:0:.,.	./.:0:.,.	0/0:16:16,0	0/0:14:14,0	./.:0:.,.	./.:0:.,.	./.:0:.,.	./.:0:.,.	0/1:15:9,6	./.:0:.,.
MockRefGenome	149143	.	A	G	.	PASS	AC=5;AF=0.025;DP=845;AV=15.33;NS=27	GT:DP:AD	./.:0:.,.	0/0:20:20,0	0/0:17:17,0	0/0:25:25,0	./.:0:.,.	./.:0:.,.	0/0:16:16,0	./.:0:.,.	0/0:16:16,0	./.:0:.,.	0/0:12:12,0	./.:0:.,.	./.:0:.,.	0/0:15:15,0	0/0:13:13,0	./.:0:.,.	0/0:12:12,0	./.:0:.,.	./.:0:.,.	0/0:10:10,0	0/0:21:21,0	0/0:12:12,0	0/0:10:10,0	./.:0:.,.	0/0:12:12,0	./.:0:.,.	./.:0:.,.	0/0:14:14,0	0/0:12:12,0	0/0:17:17,0	0/0:19:19,0	./.:0:.,.	./.:0:.,.	0/0:16:16,0	0/0:14:14,0	./.:0:.,.	./.:0:.,.	./.:0:.,.	./.:0:.,.	./.:0:.,.	./.:0:.,.
MockRefGenome	149183	.	C	T	.	PASS	AC=5;AF=0.025;DP=829;AV=15.27;NS=26	GT:DP:AD	./.:0:.,.	0/0:20:20,0	0/0:17:17,0	0/0:25:25,0	./.:0:.,.	./.:0:.,.	0/0:16:16,0	./.:0:.,.	0/0:15:15,0	./.:0:.,.	0/0:12:12,0	./.:0:.,.	./.:0:.,.	0/0:15:15,0	0/0:13:13,0	./.:0:.,.	0/0:12:12,0	./.:0:.,.	./.:0:.,.	0/0:10:10,0	0/0:19:19,0	0/0:12:12,0	0/0:10:10,0	./.:0:.,.	0/0:12:12,0	./.:0:.,.	./.:0:.,.	0/0:13:13,0	0/0:12:12,0	0/0:17:17,0	0/0:19:19,0	./.:0:.,.	./.:0:.,.	0/0:16:16,0	0/0:12:12,0	./.:0:.,.	./.:0:.,.	./.:0:.,.	./.:0:.,.	./.:0:.,.	./.:0:.,.
MockRefGenome	149186	.	C	A	.	PASS	AC=5;AF=0.025;DP=830;AV=15.27;NS=26	GT:DP:AD	./.:0:.,.	0/0:20:20,0	0/0:17:17,0	0/0:25:25,0	./.:0:.,.	./.:0:.,.	0/0:16:16,0	./.:0:.,.	0/0:15:15,0	./.:0:.,.	0/0:12:12,0	./.:0:.,.	./.:0:.,.	0/0:15:15,0	0/0:13:13,0	./.:0:.,.	0/0:12:12,0	./.:0:.,.	./.:0:.,.	0/0:10:10,0	0/0:19:19,0	0/0:12:12,0	0/0:10:10,0	./.:0:.,.	0/0:12:12,0	./.:0:.,.	./.:0:.,.	0/0:13:13,0	0/0:12:12,0	0/0:17:17,0	0/0:19:19,0	./.:0:.,.	./.:0:.,.	0/0:16:16,0	0/0:12:12,0	./.:0:.,.	./.:0:.,.	./.:0:.,.	./.:0:.,.	./.:0:.,.	./.:0:.,.
MockRefGenome	149302	.	T	C	.	PASS	AC=15;AF=0.075;DP=762;AV=12.97;NS=31	GT:DP:AD	./.:0:.,.	0/0:16:16,0	0/0:15:15,0	0/0:21:21,0	./.:0:.,.	0/1:8:5,3	0/1:16:5,11	./.:0:.,.	1/1:14:0,14	./.:0:.,.	0/0:12:12,0	./.:0:.,.	./.:0:.,.	0/0:14:14,0	0/0:12:12,0	./.:0:.,.	./.:0:.,.	./.:0:.,.	0/1:8:5,3	1/1:10:0,10	0/1:16:10,6	./.:0:.,.	0/1:9:4,5	./.:0:.,.	0/0:10:10,0	0/1:8:3,5	./.:0:.,.	0/0:12:12,0	0/0:11:11,0	0/0:15:15,0	0/0:17:17,0	./.:0:.,.	./.:0:.,.	0/0:14:14,0	0/0:12:12,0	./.:0:.,.	./.:0:.,.	./.:0:.,.	./.:0:.,.	0/1:13:7,6	./.:0:.,.
MockRefGenome	149831	.	C	T	.	PASS	AC=10;AF=0.050;DP=960;AV=17.17;NS=41	GT:DP:AD	0/0:28:28,0	0/0:62:62,0	./.:0:.,.	0/0:14:14,0	0/0:10:10,0	./.:0:.,.	./.:0:.,.	./.:0:.,.	./.:0:.,.	./.:0:.,.	1/1:27:0,27	./.:0:.,.	0/1:19:7,12	0/1:15:4,11	0/0:25:25,0	./.:0:.,.	./.:0:.,.	0/1:12:5,7	0/0:19:19,0	0/0:20:20,0	0/0:11:11,0	./.:0:.,.	0/0:14:14,0	./.:0:.,.	./.:0:.,.	./.:0:.,.	0/0:11:11,0	0/0:22:22,0	0/0:14:14,0	0/0:12:12,0	./.:0:.,.	./.:0:.,.	0/0:15:15,0	0/0:25:25,0	./.:0:.,.	./.:0:.,.	./.:0:.,.	./.:0:.,.	0/0:13:13,0	./.:0:.,.	./.:0:.,.
MockRefGenome	149832	.	G	A	.	PASS	AC=9;AF=0.045;DP=960;AV=16.98;NS=41	GT:DP:AD	0/0:28:28,0	1/1:62:0,62	./.:0:.,.	0/0:14:14,0	0/0:10:10,0	./.:0:.,.	./.:0:.,.	./.:0:.,.	./.:0:.,.	./.:0:.,.	0/0:27:27,0	./.:0:.,.	0/1:19:12,7	0/1:15:11,4	0/0:25:25,0	./.:0:.,.	./.:0:.,.	0/1:12:7,5	0/0:19:19,0	0/0:20:20,0	0/0:11:11,0	./.:0:.,.	0/0:14:14,0	./.:0:.,.	./.:0:.,.	./.:0:.,.	0/0:11:11,0	0/0:22:22,0	0/0:14:14,0	0/0:12:12,0	./.:0:.,.	./.:0:.,.	0/0:15:15,0	0/0:25:25,0	./.:0:.,.	./.:0:.,.	./.:0:.,.	0/1:9:4,5	0/1:13:7,6	./.:0:.,.	./.:0:.,.
MockRefGenome	149858	.	C	G	.	PASS	AC=10;AF=0.050;DP=949;AV=16.88;NS=43	GT:DP:AD	0/0:28:28,0	0/0:62:62,0	./.:0:.,.	0/0:14:14,0	1/1:10:0,10	./.:0:.,.	./.:0:.,.	./.:0:.,.	./.:0:.,.	./.:0:.,.	0/0:27:27,0	./.:0:.,.	0/0:19:19,0	0/0:14:14,0	0/0:24:24,0	./.:0:.,.	./.:0:.,.	0/0:12:12,0	0/0:17:17,0	1/1:20:0,20	0/0:11:11,0	./.:0:.,.	0/0:14:14,0	./.:0:.,.	./.:0:.,.	./.:0:.,.	0/0:10:10,0	0/0:21:21,0	1/1:14:0,14	1/1:12:0,12	./.:0:.,.	./.:0:.,.	0/0:15:15,0	0/0:25:25,0	./.:0:.,.	./.:0:.,.	./.:0:.,.	./.:0:.,.	0/0:13:13,0	./.:0:.,.	./.:0:.,.
MockRefGenome	149861	.	C	A	.	PASS	AC=10;AF=0.050;DP=948;AV=16.86;NS=43	GT:DP:AD	0/0:28:28,0	0/0:62:62,0	./.:0:.,.	0/0:14:14,0	1/1:10:0,10	./.:0:.,.	./.:0:.,.	./.:0:.,.	./.:0:.,.	./.:0:.,.	0/0:27:27,0	./.:0:.,.	0/0:19:19,0	0/0:14:14,0	0/0:24:24,0	./.:0:.,.	./.:0:.,.	0/0:12:12,0	0/0:17:17,0	1/1:20:0,20	0/0:11:11,0	./.:0:.,.	0/0:14:14,0	./.:0:.,.	./.:0:.,.	./.:0:.,.	0/0:10:10,0	0/0:21:21,0	1/1:14:0,14	1/1:12:0,12	./.:0:.,.	./.:0:.,.	0/0:15:15,0	0/0:25:25,0	./.:0:.,.	./.:0:.,.	./.:0:.,.	./.:0:.,.	0/0:13:13,0	./.:0:.,.	./.:0:.,.
MockRefGenome	149870	.	C	T	.	PASS	AC=6;AF=0.030;DP=944;AV=16.81;NS=42	GT:DP:AD	0/0:28:28,0	0/0:61:61,0	./.:0:.,.	0/0:14:14,0	0/0:10:10,0	./.:0:.,.	./.:0:.,.	./.:0:.,.	./.:0:.,.	./.:0:.,.	0/0:27:27,0	./.:0:.,.	0/0:19:19,0	0/0:14:14,0	0/0:24:24,0	./.:0:.,.	./.:0:.,.	0/0:12:12,0	0/0:17:17,0	0/0:20:20,0	0/0:11:11,0	./.:0:.,.	0/0:14:14,0	./.:0:.,.	./.:0:.,.	./.:0:.,.	./.:0:.,.	0/0:21:21,0	0/0:14:14,0	0/0:12:12,0	./.:0:.,.	./.:0:.,.	0/0:15:15,0	0/0:25:25,0	./.:0:.,.	./.:0:.,.	./.:0:.,.	0/1:9:5,4	0/1:12:5,7	./.:0:.,.	./.:0:.,.
MockRefGenome	149888	.	C	G	.	PASS	AC=18;AF=0.090;DP=908;AV=16.90;NS=39	GT:DP:AD	0/0:25:25,0	0/0:59:59,0	./.:0:.,.	0/0:14:14,0	./.:0:.,.	./.:0:.,.	./.:0:.,.	./.:0:.,.	./.:0:.,.	./.:0:.,.	0/0:26:26,0	./.:0:.,.	0/0:19:19,0	0/0:14:14,0	1/1:24:0,24	./.:0:.,.	./.:0:.,.	0/0:11:11,0	0/1:17:13,4	0/0:20:20,0	1/1:11:0,11	./.:0:.,.	0/1:17:3,14	./.:0:.,.	./.:0:.,.	./.:0:.,.	./.:0:.,.	1/1:21:0,21	0/0:14:14,0	0/0:12:12,0	./.:0:.,.	./.:0:.,.	0/0:15:15,0	0/0:24:24,0	./.:0:.,.	./.:0:.,.	./.:0:.,.	0/1:9:5,4	0/1:12:5,7	./.:0:.,.	./.:0:.,.
MockRefGenome	149915	.	C	T	.	PASS	AC=11;AF=0.055;DP=921;AV=16.24;NS=42	GT:DP:AD	0/0:25:25,0	0/0:58:58,0	./.:0:.,.	0/0:14:14,0	0/0:10:10,0	./.:0:.,.	./.:0:.,.	./.:0:.,.	./.:0:.,.	./.:0:.,.	0/0:26:26,0	./.:0:.,.	0/0:18:18,0	0/0:14:14,0	0/0:24:24,0	./.:0:.,.	./.:0:.,.	0/0:11:11,0	0/0:17:17,0	0/0:20:20,0	0/0:11:11,0	./.:0:.,.	0/0:14:14,0	./.:0:.,.	./.:0:.,.	./.:0:.,.	./.:0:.,.	0/0:21:21,0	0/0:14:14,0	0/0:12:12,0	./.:0:.,.	./.:0:.,.	0/0:15:15,0	0/0:23:23,0	./.:0:.,.	./.:0:.,.	./.:0:.,.	0/1:9:5,4	0/1:12:5,7	./.:0:.,.	./.:0:.,.
MockRefGenome	149924	.	G	C	.	PASS	AC=5;AF=0.025;DP=729;AV=16.52;NS=33	GT:DP:AD	0/0:25:25,0	0/0:58:58,0	./.:0:.,.	0/0:13:13,0	0/0:10:10,0	./.:0:.,.	./.:0:.,.	./.:0:.,.	./.:0:.,.	./.:0:.,.	./.:0:.,.	./.:0:.,.	./.:0:.,.	./.:0:.,.	1/1:24:0,24	./.:0:.,.	./.:0:.,.	0/0:11:11,0	./.:0:.,.	./.:0:.,.	./.:0:.,.	./.:0:.,.	1/1:14:0,14	./.:0:.,.	./.:0:.,.	./.:0:.,.	./.:0:.,.	0/0:20:20,0	0/0:14:14,0	0/0:12:12,0	./.:0:.,.	./.:0:.,.	0/0:15:15,0	0/0:23:23,0	./.:0:.,.	./.:0:.,.	./.:0:.,.	./.:0:.,.	0/0:12:12,0	./.:0:.,.	./.:0:.,.
MockRefGenome	149972	.	C	A	.	PASS	AC=17;AF=0.085;DP=746;AV=14.00;NS=36	GT:DP:AD	./.:0:.,.	./.:0:.,.	./.:0:.,.	./.:0:.,.	0/0:10:10,0	./.:0:.,.	./.:0:.,.	./.:0:.,.	./.:0:.,.	./.:0:.,.	1/1:19:0,19	./.:0:.,.	1/1:18:0,18	1/1:10:0,10	0/0:25:25,0	./.:0:.,.	./.:0:.,.	./.:0:.,.	0/0:16:16,0	0/0:20:20,0	0/0:12:12,0	./.:0:.,.	0/0:10:10,0	./.:0:.,.	./.:0:.,.	./.:0:.,.	0/0:12:12,0	0/0:19:19,0	0/0:12:12,0	0/0:12:12,0	./.:0:.,.	./.:0:.,.	1/1:13:0,13	1/1:22:0,22	./.:0:.,.	./.:0:.,.	./.:0:.,.	0/1:8:4,4	0/1:10:7,3	./.:0:.,.	./.:0:.,.
MockRefGenome	149975	.	G	T	.	PASS	AC=19;AF=0.095;DP=766;AV=14.31;NS=36	GT:DP:AD	./.:0:.,.	./.:0:.,.	./.:0:.,.	./.:0:.,.	0/0:10:10,0	./.:0:.,.	./.:0:.,.	./.:0:.,.	./.:0:.,.	./.:0:.,.	1/1:21:0,21	./.:0:.,.	1/1:18:0,18	1/1:11:0,11	0/0:25:25,0	./.:0:.,.	./.:0:.,.	./.:0:.,.	0/0:16:16,0	0/0:20:20,0	0/0:12:12,0	./.:0:.,.	0/0:10:10,0	./.:0:.,.	./.:0:.,.	./.:0:.,.	0/0:12:12,0	0/0:20:20,0	1/1:12:0,12	0/0:12:12,0	./.:0:.,.	./.:0:.,.	1/1:13:0,13	1/1:22:0,22	./.:0:.,.	./.:0:.,.	./.:0:.,.	0/1:8:4,4	0/1:11:7,4	./.:0:.,.	./.:0:.,.
[truncated: 17,121 more rows]
[truncated: 22 more columns]
